# Supplementary material for: Intracellular growth of Mycobacterium tuberculosis after macrophage cell death leads to serial killing of host cells
Source: eLife journal article supplement (doi:10.7554/elife.22028), 2017-01-28
Supplement: supp [file elife-22028-supp-v1.zip]

Archive with 23 entries (23 files):
- elife_poa_e22028_Source_code_2.m
- elife_poa_e22028_Video_3.mp4
- elife_poa_e22028_Figure_1_source_data.xlsx
- elife_poa_e22028_Figure_1_figure_supplement_4.pdf
- elife_poa_e22028_Video_2.mp4
- elife_poa_e22028_Video_7.mp4
- elife_poa_e22028_Figure_7_source_data_1.xlsx
- elife_poa_e22028_Figure_9_figure_supplement_1.pdf
- elife_poa_e22028_Video_1.mp4
- elife_poa_e22028_Figure_5_figure_supplement_1.pdf
- elife_poa_e22028_Video_5.mp4
- elife_poa_e22028_Figure_8_figure_supplement_1.pdf
- elife_poa_e22028_Source_code_3.m
- elife_poa_e22028_Video_4.mp4
- elife_poa_e22028_Figure_7_source_data_3.xlsx
- elife_poa_e22028_Figure_1_figure_supplement_5.pdf
- elife_poa_e22028_Source_code_1.m
- elife_poa_e22028_Figure_1_figure_supplement_3.pdf
- elife_poa_e22028_Figure_1_figure_supplement_1.pdf
- elife_poa_e22028_Video_6.mp4
- elife_poa_e22028_Figure_1_figure_supplement_2.pdf
- elife_poa_e22028_Figure_6_source_data.xlsx
- elife_poa_e22028_Figure_7_source_data_2.xlsx
