# Supplementary material for: Intracellular growth of Mycobacterium tuberculosis after macrophage cell death leads to serial killing of host cells
Source: eLife journal article supplement (doi:10.7554/elife.22028), 2017-01-28
Supplement: supp [file elife-22028-supp-v1.zip › elife_poa_e22028_Figure_1_figure_supplement_1.pdf]

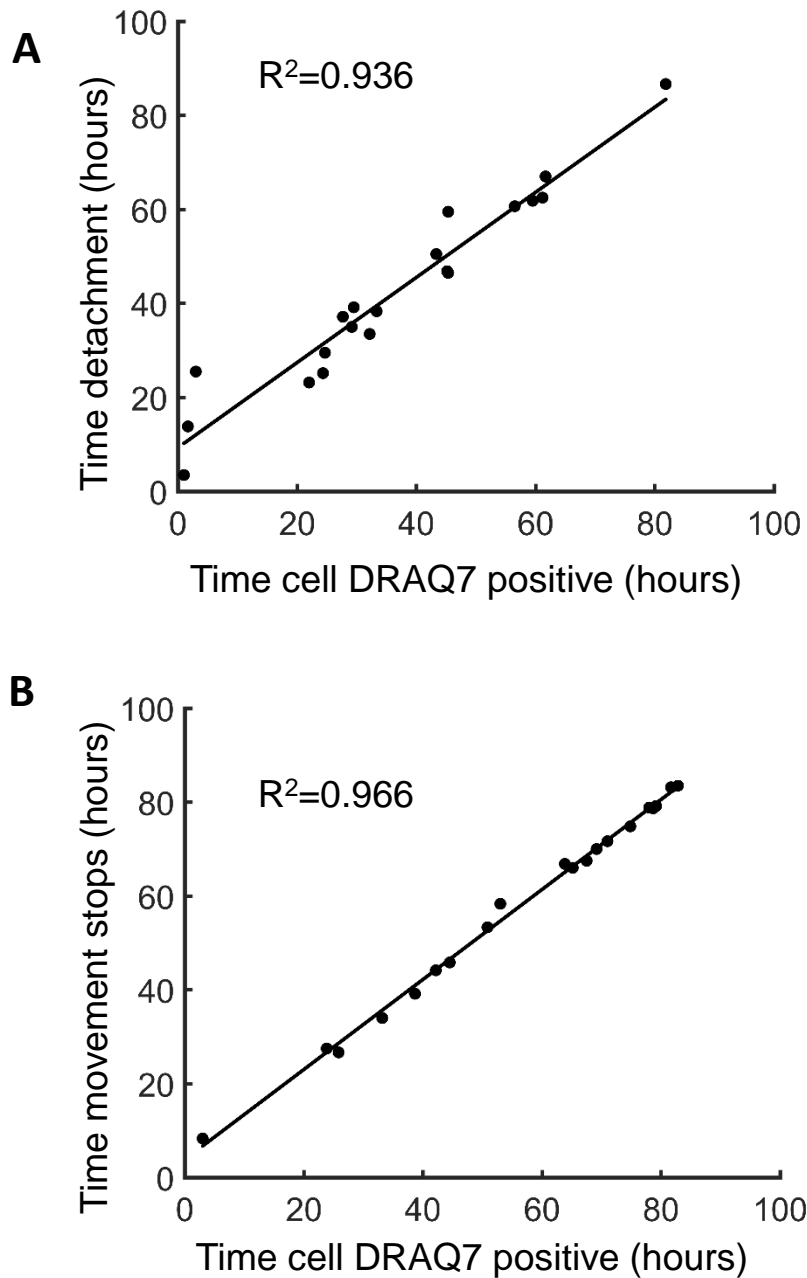

**Figure 1-Figure supplement 1.** Measures of cell death. Time of cell death induced by Mtb and determined by macrophage dynamics was correlated to macrophage death as determined by uptake of the dead cell stain DRAQ7. Time of DRAQ7 uptake was correlated to time of macrophage detachment (**A**) or time of cessation of movement of internal cellular structures (**B**).
