# Supplementary material for: Intracellular growth of Mycobacterium tuberculosis after macrophage cell death leads to serial killing of host cells
Source: eLife journal article supplement (doi:10.7554/elife.22028), 2017-01-28
Supplement: supp [file elife-22028-supp-v1.zip › elife_poa_e22028_Figure_1_figure_supplement_2.pdf]

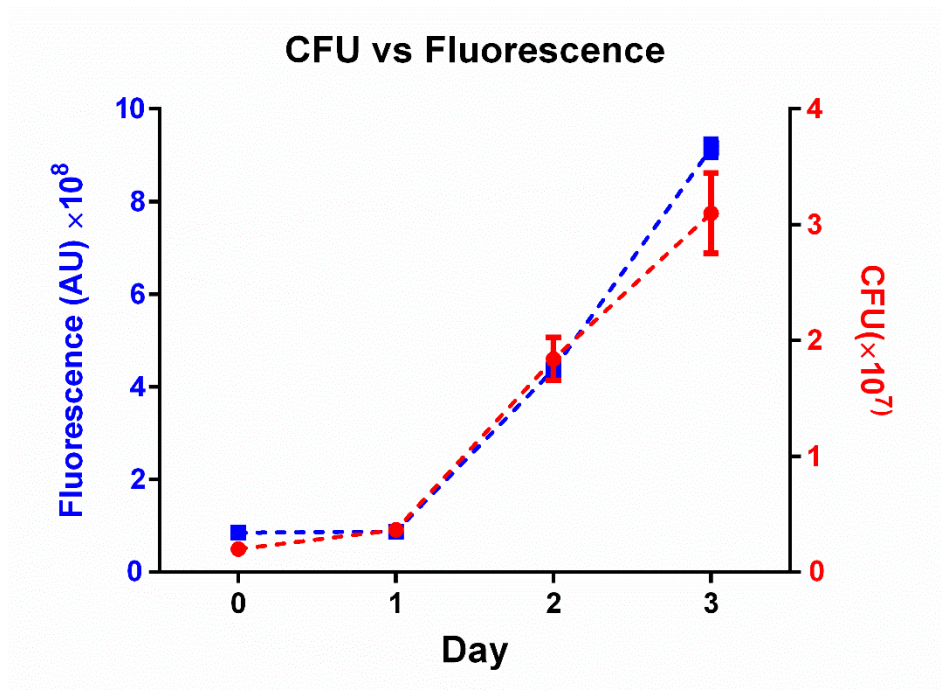

**Figure 1-Figure supplement 2.** Fluorescence as a measure of Mtb numbers. we tracked the increase in Mtb by fluorescence (blue squares) versus by colony forming units (CFU, red circles) over 3 days of growth in culture. Means and standard deviations of triplicates. One of two independent experiments.
