# Supplementary material for: Intracellular growth of Mycobacterium tuberculosis after macrophage cell death leads to serial killing of host cells
Source: eLife journal article supplement (doi:10.7554/elife.22028), 2017-01-28
Supplement: supp [file elife-22028-supp-v1.zip › elife_poa_e22028_Figure_1_figure_supplement_3.pdf]

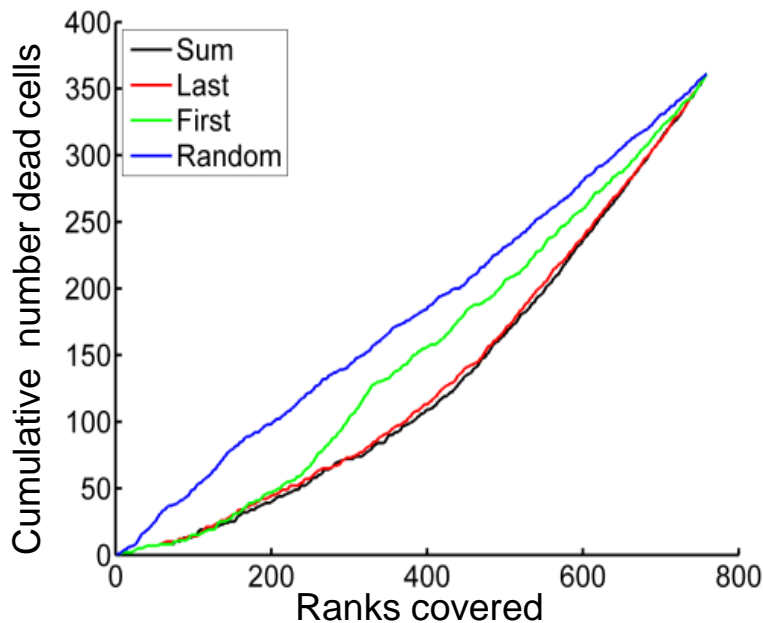

**Figure 1-Figure supplement 3.** MDMs were ranked according to sum of Mtb internalized (black), number of Mtb in the last aggregate internalized (red), number of Mtb in the first aggregate internalized (green), or randomly (blue). Ranks (x-axis) were then plotted against the cumulative number of dead cells present up to each rank (y-axis). Ranking according to the sum of Mtb internalized gave the best separation between the top 50% and the bottom 50% of ranks (ratio top/bottom = 2.6), followed by number of Mtb in the last clump internalized (2.4), number of Mtb in the first clump (1.4), or randomized ranking (1.0). All values were significant relative to the randomized ranking ( $p < 0.0001$ ), as determined from 10,000 randomizations.
