# Supplementary material for: Intracellular growth of Mycobacterium tuberculosis after macrophage cell death leads to serial killing of host cells
Source: eLife journal article supplement (doi:10.7554/elife.22028), 2017-01-28
Supplement: supp [file elife-22028-supp-v1.zip › elife_poa_e22028_Figure_1_figure_supplement_4.pdf]

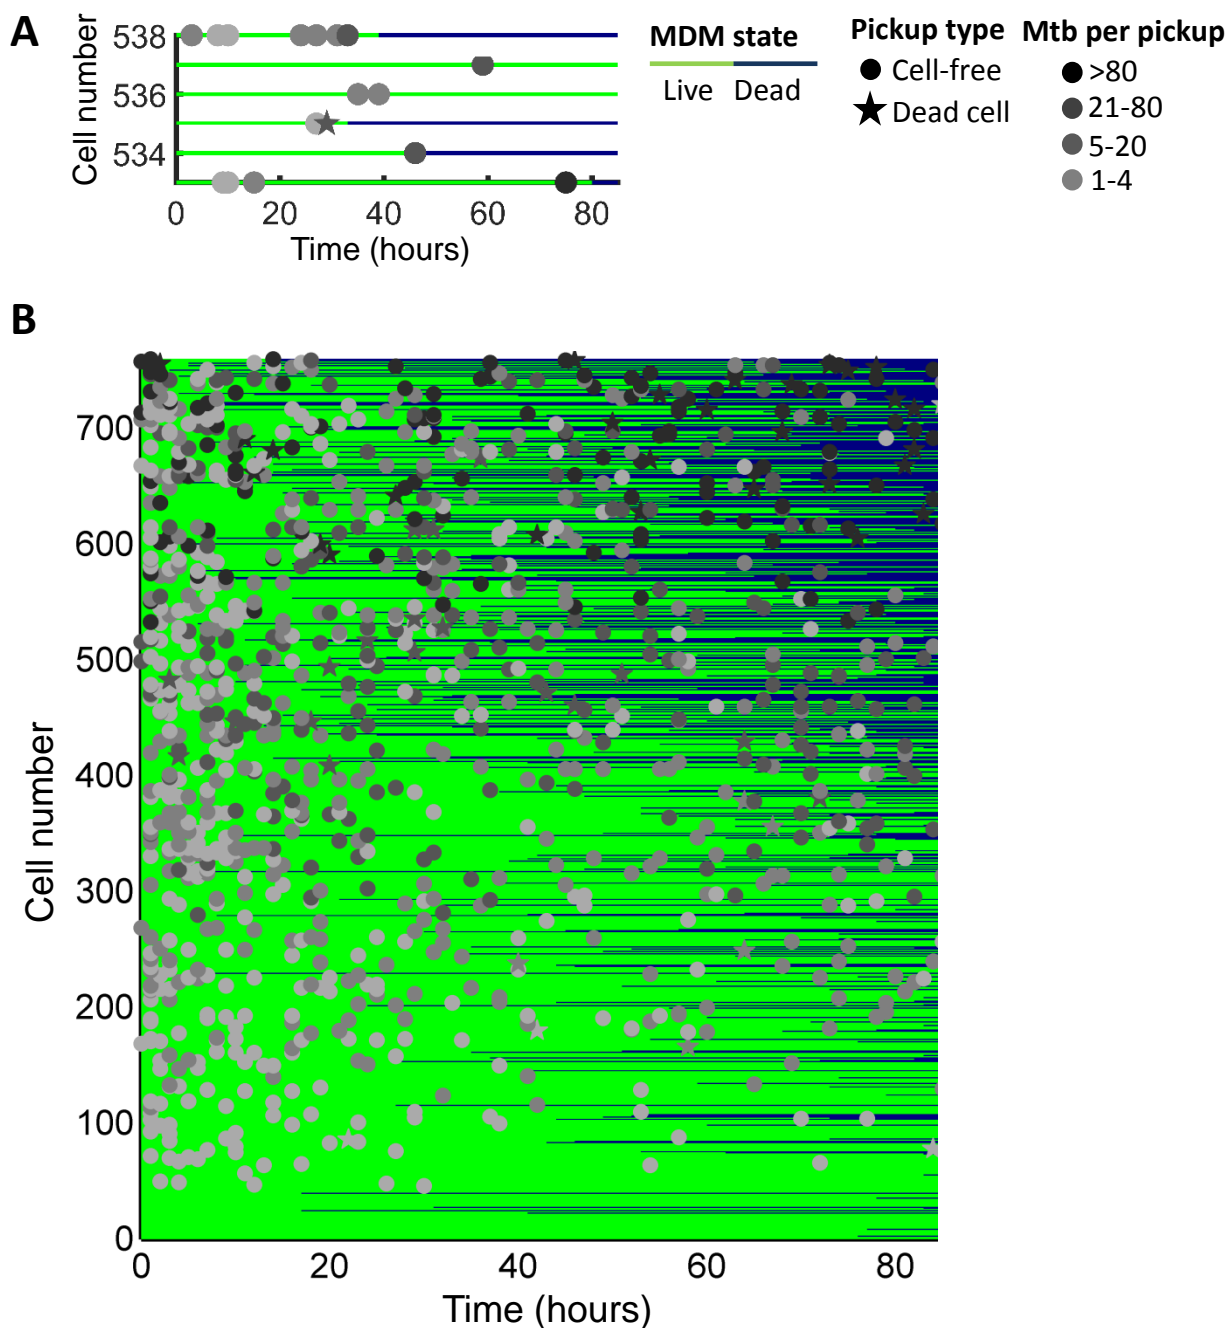

**Figure 1-Figure supplement 4:** Outcomes of macrophage-Mtb interactions. **(A)** A subset of cells is shown as an example. Macrophages were numbered on the y-axis based on the sum of Mtb internalized, with cells internalizing the largest number at the top of the chart. The fate of each macrophage over time is represented by one line which intersects the y-axis at the rank of the cell. The time of macrophage death, if it occurred, is at the point where the line changes from green to dark blue. The timing and number of bacteria per pickup event is indicated by the x-axis location and shade of the marker, respectively. Pickups of cell-free Mtb are marked as circles, and pickups of dead infected cells as stars. **(B)** The full dataset of 759 cells from five independent imaging experiments. For cells which died and detached, the dark blue line was extended from the point of cell death to movie end.
