# Supplementary material for: Intracellular growth of Mycobacterium tuberculosis after macrophage cell death leads to serial killing of host cells
Source: eLife journal article supplement (doi:10.7554/elife.22028), 2017-01-28
Supplement: supp [file elife-22028-supp-v1.zip › elife_poa_e22028_Figure_1_source_data.xlsx]

## Sheet: Sheet1
12165	8437	6601.5	6601.5	7098.25	7835.25	8832.5	8832.5	7989.25	7280.75	6751.5	6751.5	6792	7160.75	7656	8634.25	8756.5	9870.75	9621.75	10442.2	10575	10703.2	10981.2	11103.5	12512.5	12742	13331.8	12905.2	12905.2	12888.2	12064.8	11537	10285.2	10092.8	9304.25	8787.75	8102.5	7704.75	7380.75	7074.25	6825.25	6825.25	6462.5	6259	6259	6019.25	6019.25	6305.25	6613.5	7168.5
34690	33381.5	31336.5	27785.5	25552.8	25480.5	25464.8	27102	28334	28847.5	28779	28837	29338	29232.2	28685.5	29203.5	29457	29319.8	29752.2	29912.8	29752.2	29900.5	29814.2	29878.5	29937.5	30069.8	30440	30440	29701.5	28052.8	26753.2	26494.5	26019.2	26051.2	26726.5	26820.5	26098.2	26155.2	26877.8	26137.2	25999.5	26291.5	26045	25422.2	24874.2	24436	24436	24735	24883	25447.8
15564	14165.8	13339	12789	12566.2	12374	12328	11794.8	11816	11816	12482	12183	12780.2	13008.8	13233	13758.5	14079	14080	14084	14083	13859	13435	13128.8	13030.8	12992.5	12992.5	12992.5	12909	12596.5	12074.8	11506.8	11206.2	11419.8	11419.8	11541.8	11530.5	11530.5	11206.8	11206.8	11319.8	11904	12647.2	12748.2	12988	12958	12688.2	12622	12830	12830	13058
181	149.5	150.75	130	122.25	122.25	126	128	126.75	138.5	140.5	124.25	121.25	126.25	123.25	120.5	123.25	126.75	124.75	119.5	127	116.5	107.25	111.25	104.25	99	108.75	117	117	126	126	121.5	120.5	118.25	114.75	123	123	133.25	145	159.5	169.5	191.5	191.5	186.5	156.75	153.5	153.5	153.5	152	155
2595	2209	2209	1959.75	1959.75	1813.5	2062.25	2001.75	2596.75	2436.25	2812.75	2864.5	2864.5	2657.25	3028	3309	3040.5	3454	3627	3732	3775	3921.5	3934.5	4036.25	4187.75	4315	4714.75	4824	4892.25	4754	4598	4556.75	4496.75	4338.5	4496.75	4608.75	4411.25	4251.75	4079	3402	3012.5	3012.25	2888	2866.25	2928.75	3087.25	2849.75	3065.25	3278.5	3487.75
221	230.5	278.75	270.5	213.25	198.25	275.25	400	973.75	973.75	963.5	374.25	169.5	157	163.75	331.5	1204.5	7852.5	20412.2	27849	27854.8	27854.8	25411.5	23790	23236.2	22509.5	22509.5	20190	15964.2	12457.2	11797.5	11663	11341	11829.5	12413.8	12465.5	13174.8	13303.2	13520.2	14203	13907	13674.5	13674.5	13600	13600	13603	13674.5	14537	16071.8	17556.2
10230	10230	9936.5	9157	8617.25	8207.75	7608.75	7608.75	7432.75	8003.75	8696.5	8805.25	8805.25	9043	9124.25	9044.25	9095.25	9013	8843.5	8412	8463	8146.5	8685.25	9044	9555.5	10133.8	10253	10253	9974	9490.5	9213.5	9213.5	9336.5	9181.5	9186	9200.75	9200.75	9367.75	9729.75	10075	10339.2	10354.8	10625.8	10638.2	11009.2	10690.8	10890.8	10977.8	11009	10750
28284	28669.8	28002.2	27430.2	28093.8	27763	26944.8	27009.8	27934.8	28109.2	28931.5	28931.5	28850.8	28387.8	27318	27318	28161.2	28614.5	28850.2	29113.2	28850.2	29352.5	29954.5	30497	30246.8	30246.8	29648.8	29192.2	28401	28401	29076.5	30111.5	31771.8	31891.8	32214.8	33034.2	33649.8	33649.8	33649.8	33588.5	33412.2	32897.2	32240.2	32240.2	33225.5	33587	34321.5	35388.8	34321.5	34798.2
193	157	153.25	150.25	162.5	157.25	148.5	113.25	92.75	92.75	102.25	100	108	121.25	121.25	128.75	223	471.25	477	520.25	683	722.5	728	827.75	827.75	755.5	719.5	677.75	602.75	502.75	462.75	416.75	381.75	285	233	209.75	196.75	190.75	188.5	178.75	174.5	177.75	184.75	177.75	182.75	179	183.25	190.5	213	221.75
238	210	204.5	189.25	184.75	197.5	197.5	174	149	136.5	136.5	134	148.75	162.5	164.75	164.75	168	168	164.75	167.75	167.75	171.25	165.25	170.75	172.25	175	166.75	166.75	159.75	164.25	163	167	170	180.75	176.5	168.5	178.25	175.75	175	184.5	189.75	175.25	175.75	164.5	162.25	159	161.75	166.5	172.75	183.25
36942	35108	32706	31074.8	30988.5	30194	29790.2	30202.2	31875.5	33545.2	35084	35084	35070	34969.5	34679.5	34535.8	34603	34488	34488	34437	34737.5	34319.5	34875.5	34907.5	35336.5	35336.5	35949.8	36863.2	37068.5	37068.5	36439	35974.5	35360.2	34469.8	34905.8	34014.8	33059.2	33037.8	31911.2	31550.5	31167.5	31047	31092.2	31092.2	31092.2	30931.8	30674.5	30584.2	30800	30800
6402	6909.5	7451.5	8952	9346.5	9499.75	9613.5	9124.5	8479.5	8126.5	8032.75	8032.75	8220.75	8270	8346.5	8432.5	8432.5	9002	9352.25	9592	9760.5	9790.25	9729.5	9954.75	10151	10120.5	9751	9733	9297	8981.75	8716.25	8705.75	8534.75	8654	8884.25	9111	8987.75	8987.75	8899.25	8699.75	8568.5	8580.5	8438.5	8369	8369	8602	8658.25	8645.25	8872.25	9270.25
15777	14734.2	14228	13987.5	13687.5	13283.8	12897.2	12929	12929	13406.5	13535.8	13535.8	13202.5	12394.2	12203.2	12203.2	12263.8	12263.8	12131	11515.2	10953.2	10373.8	9767.25	9440.5	9440.5	9790.75	9646.75	9470	9470	8671.25	8671.25	8604.75	9095.5	10023.2	10488.8	10596.5	11146.2	12207.2	13051.5	13356.2	13361.8	13190.8	13190.8	13306.2	13811	14588.5	14588.5	14384.2	13253.5	13384.8
3080	2970	3064.25	3062.25	2250	2250	2490.5	2392.5	2293	2469.75	2196.5	2387.25	2451.25	2214.75	2672.75	3743.75	4678.5	5557.75	5981.5	6081.25	6315	6608.5	7182.75	7648.25	7906.5	7788	7937.5	7952	7799	7799	8034.75	8249	8522.5	8722.75	8884.25	9001.25	8985.75	8840.75	8515.75	8091.5	7705.75	7584.5	7740.75	7905.25	7623.5	8013.25	8126	8087	8279.5	8442.25
3704	3454.5	3454.5	3234.5	2978.25	2753.5	2610.75	2600.25	2713.25	2604.75	2814.25	3169.75	3118	3105.5	3040.5	2992	2992	3229.5	3193.5	3193.5	3053.5	3005	2703.25	2576.5	2543.25	2707.5	2702	2868.75	3016	3016	2898.75	2794	2661.25	2605	2605	2612.25	2683	2690.5	2690.5	2642	2597.5	2496.25	2496.25	2476.25	2463.25	2250.25	2347.25	2347.25	2698.75	3176.75
25604	24612.5	23845.8	23295	23221.5	22716.2	22706	22835.2	22835.2	23236	23353.2	23485.5	23485.5	23378.2	23378.2	23685	24246.8	24720.2	24888.5	25030.8	25366.8	25839.5	26144	26144	26102.2	25148.2	23851	23070.8	22755.2	22477.2	22477.2	22098	21949	22062	22703.2	23095.5	23381	24026.8	23986.5	24076	24230.5	24697.5	24765	25080.2	24736.5	24613	24575	24764	24569	24873.5
37603	41358.5	42072	41211.2	45635.8	47359.5	47087.5	45249.5	47213.2	43856.2	43358.5	43358.5	46061.2	47995.5	49642.5	49711.8	51559.2	50179.8	52420	54232.5	58595.5	59015.5	60558.5	61067.5	61958.8	62882.8	64381.8	65272.8	65381.5	65381.5	64592.2	64583.5	64583.5	64129.2	63520.2	64125.8	63694	63109	63387.2	63924.2	64179.8	63985.8	66460.5	70204	73141	74108.8	75311.5	75158	68417.5	54836
6269	5621.25	5306.5	5073.5	4811	4633.75	4524.5	4405.25	4441.5	4403.75	4482.75	4540	4563.5	4537.5	4679.5	4817.25	5227.5	8436.5	14187.2	18103.2	18294.2	18294.2	16735.5	14348	13677.2	13602.8	13844	13589	12801.2	9818.25	7291	6442.75	6442.75	6531.75	7146.75	7348.5	8216.25	8906.75	10899.8	12123.2	12932.2	13743	14401.5	14978.2	15776.8	17048.5	18652.8	20140.5	24348.8	26000.8
3673	2978.75	2326.5	1635.5	1753.5	1566	1724.75	1724.75	1724.75	1863.5	1873.25	2285.25	2149.25	2185.25	1875.75	1875.75	1867.75	1759	1723	1595.25	1709.5	1756.75	1770	2056	2351.5	2205.5	2459.5	2459.5	1969.25	2159	2302.5	1982.5	2042	2042	1971.25	1971.25	1964	1918.25	2023.5	2163.75	2320.25	2275.75	2564.5	2469.75	2383.25	2383.25	2383.25	2285	2021	2318.75
727	686.25	666	666	733.25	886	1051.5	1051.5	1018	1001	1075.5	1007	1149.25	1171	1255.25	1835.75	3011.5	3367	3367	2675	2675	2440.5	2527.5	2781	2965.75	2965.75	3139	3228	3346.25	3346.25	3256	3161	3174.25	3075.25	2992.5	2804	2682	2569.5	2365	2348.5	2348.5	2505.5	2662.5	2748.5	2748.5	2775.25	2761.75	2756.25	2696.5	2696.75
12186	12399	12188	11915.2	12499.5	12510.8	13157	13648	13648	13221.2	11722.2	10997.8	9866.25	10522.5	10421.2	10678	10356	10356	10234	9222	8275	7910.75	8472.75	7852.75	8126	8126	7367	6421	6421	6909	9260.25	10253	11042	10210	10063.8	10063.8	11283	11742	11742	12253.8	10870.5	9874	9115.5	9549	9372.75	9657.5	10129.8	11131.5	12121.2	13192.2
226	206	202.75	202.75	214	284.5	359.75	359.75	357.25	357.25	380.75	467.5	488.25	626.75	769.75	845.75	824.5	824.5	800.75	768.5	733.25	714	672	650.25	659	705.25	733.5	739.75	741.75	697.5	706.75	703.5	695.25	729.5	766.75	782	775.25	782.25	759.5	764.75	769.25	769.25	773.25	768	733.75	720.25	703	703	714.5	728
18379	15697.8	14647	13668.2	12916	13050.5	13072.8	13072.8	13563	13935	14418.2	14418.2	14510.2	14510.2	15275	15084.5	15084.5	14978.8	14213.5	14213.5	14470.8	15667.5	16944.2	17892.5	18334	18334	18195	17874.8	17468	17185.2	16772	16729	16705.2	16934.8	16754.8	16703.5	16168.5	15704.5	14298.8	12998.8	12747.8	12747.8	14181.8	14611.5	15019.5	15416.2	16245.5	17187.5	17921.8	17921.8
20699	17920	16856.8	16573.2	15970.8	15986.5	15986.5	15329	15942.5	15942.5	15494	15085.2	15485.2	15670.8	16286	15947.2	15874	15037.2	14392.2	14392.2	14500	14500	14242.2	14029.8	14029.8	13902.2	13624.5	13354.2	13957	13821.8	13580	14002	14409	14343	14583.2	14927.8	15118.8	15210.2	15444.2	15806.8	16588.8	17187.8	17187.8	17085	16838	17058.5	17088.5	17614.2	18311.8	18738.2
195	193	192.5	207.5	236.75	224.75	224.75	210.75	183	175.5	176.5	185	182.25	177	181.25	171	159	150	154.25	159.25	163	188.25	211.25	205.5	205.5	219.75	223	233	252	269.75	283.25	281	282.75	273	265.25	265.25	270.75	270.25	291.25	312.5	308.75	263.5	482.5	263	253.25	256.5	281	281	307	316.5
4091	3429.75	3018.5	2870	2792.25	2713.25	2612.75	2540.25	2540.25	2443.75	2540.75	2640	2608.75	2592.5	2619	2453.25	2490.5	2693.5	2698.5	2857	2989	3081	3153.5	3148.25	3072.75	3068.25	2946.75	2873.5	2946.75	2898.25	2885.25	2857.75	2980	2815	2774.5	2730.5	2818.25	2695.5	2689.5	2656	2584.75	2472.25	2370.25	2326.75	2274	2234.25	2279.5	2403.25	2579.75	2622.5
1565	1500	1477.25	1465	1411.75	1430.5	1398.5	1398	1366.75	1319	1273.75	1267.25	1276.75	1256.75	1280.5	1304	1329	1297.25	1329	1366.5	1407.75	1431	1431	1421.5	1479.25	1544.75	1478.75	1505	1512.5	1492.75	1483.75	1477.75	1440	1371	1371	1328.75	1340.75	1361.25	1361.25	1301.75	1228	1191.25	1162.75	1120.25	1086	1074	1017.5	1017.5	1023	1025.25
1598	1728.5	1830.5	1830.5	1830.5	1795	1791	1743.25	1802.5	1748.25	1745	1745	1795.5	1720.25	1772.25	1848	1918.75	1903.25	1903.25	1909.5	1906.75	1868.5	1928.75	1928.75	1887	1859	1840.25	1783	1789	1725.25	1664.75	1668.75	1693.75	1660.25	1734.25	1739.75	1702.75	1757.25	1757.25	1741.75	1707.5	1711.5	1654.5	1673	1678.5	1686.25	1670.25	1658.5	1654.25	1651.75
28793	29312.8	29312.8	28997.8	27547.5	26762	26740.2	26880.2	26407.2	26880.2	27604	27705	28153.2	28153.2	27558	27558	27766.8	28014.5	28302.5	28302.5	28526.8	28534.2	28344.2	28591.5	28591.5	28084.2	27277	26568.5	26121.5	26068.2	26068.2	25934.8	25847.2	26207.2	26302.2	26117.8	26398.5	26576.2	26483	25794.5	25940.5	25940.5	25940.8	26103.8	26103.8	25953.8	25573	25573	25965	25999
5518	5679.5	5679.5	5543.25	5429.75	5246.25	5106.75	5106.75	5222.5	5126	5132.75	5222.75	5291.25	5318.25	5366.5	5366.5	5376.5	5239.25	5151.25	5012	5068	5052	5124.75	5052	5018.5	4935.5	4881.75	4862.25	4881.75	4935.5	5030.75	5153.25	5328	5534.25	5534.25	5408	5400.75	5239.75	5022.5	4891.75	4736.5	4598.25	4499.75	4355.75	4355.75	4407.25	4691.75	4824	4824	4728.75
12125	11399.8	10177.5	9193	8784.25	8474.75	8587.75	8587.75	9128.75	9648.25	10032.2	10435.8	10582	11002.5	11153	11257.5	11366.5	11373.5	11176	11100.8	10771.2	10505.5	10096	9441	9356.5	9356.5	9540.5	9723.75	9883.5	9952.25	9858.25	9882.5	9882.5	9788	9728	9590.75	9585.75	9447.75	9154	8804.25	8382.75	8290.75	8494.75	8869.25	9015.75	9398	9684.5	9796.25	10147.2	10708
10597	10600.8	10601.5	10573.8	10554	10445.8	10299.2	10311	10527	10575.8	10706	10754.5	10751.2	10739.2	10631.2	10533.8	10336.2	9967.75	9529.75	9342.25	8986	8936.75	9172.75	9237.25	9055.75	9055.75	8769.5	8634.75	8542.5	8238.5	7954	7772.75	7772.75	7916.25	8068.25	8217.75	8311.25	8311.25	8363.75	8380.25	8450.25	8450.25	8531.5	8569.25	8571.25	8568.75	8535.75	8480	8369.25	8369.25
74	79.75	79.75	77	66.5	63.25	63	63.75	63.75	65.5	68.25	66	65.25	70.25	72.5	70.5	74.25	73.75	70.25	70.25	88.25	113.25	137.25	156.5	157	157	136.75	124.75	124.75	126.25	125.5	134.5	132	120.5	117.5	131.25	124.75	133	140	148.75	142.25	146	149	147.5	138.75	143.25	130.5	120.75	112.5	119.75
203	250	252.5	252.5	222.75	215	213.75	222	225.5	229.25	229.75	227	214.75	211.75	213	268.75	304.75	304.75	416.25	303	212.25	193	188.5	184	189.25	193.75	194.25	191.75	189.75	190.25	184.25	184.25	647.25	1457.5	1993.25	2098.5	2154.75	2107	2259.25	2246	2121.25	2113.25	2177	2162.75	2212.5	2282.75	2358.5	2468.75	2595.75	2638
5051	4754.75	4608	4428	4373	4469	4236.25	4131.25	4189.5	4220.25	4094.5	4220.25	4497.75	4856.5	5303.75	5550	5550	5525.75	5525.75	5494.25	5507.5	5764.5	5964	5922.5	6031	6031	6031	6038.75	6042.25	6023.75	6093	6195.25	6350	6617	6845.5	7001	7001	7030.25	7086.75	7011.5	6903.25	6894.25	6736.25	6528.75	6341	6341	6402.75	6621.25	6807.5	6977.75
3428	3408	3380.5	3028.75	2635.75	2491.25	2419.5	2419.5	2554.25	2721.75	2957.25	2976.5	2865.5	2902.75	2960	2986	3228	3385.75	3474.25	3480	3442.25	3434.5	3294	3115	3055.75	2967	2879.5	2824	2683.75	2643.75	2634.75	2634.75	2623	2629.5	2560	2538.25	2538.25	2561.25	2658	2797.5	2828.5	2910.75	2937.75	2982.25	3119.75	3272.75	3252	3454.5	3463.5	3425.75
274	274	997.5	2215	3085.75	3931.25	3751.5	3416	3266	2240.5	2091.5	2167	2007.25	1917.25	2048.25	2344.5	2930.25	3182.75	3352.25	3414.25	3412.25	3380.25	3415	3414.5	3358.5	3190.5	3041.25	2633.5	1948	1505.5	1505.5	1520.75	1764.25	2057.75	2326.25	2657.5	3000	3162.5	3148	3281.5	3281.5	3418.75	3576.75	3656.5	3656.5	3656.5	3554	3202.25	3178	3172.5
544	375	309.5	309.5	310	321.5	310.75	316.75	301	284.75	274.25	280.5	283.5	279.25	259.75	255.75	251	237	252.25	278.5	289.5	290.75	298	304.5	310.5	324.25	339.5	346.5	337.5	330	324.5	315	311	295.25	264.75	240	237.25	217.75	193.25	195.25	222.5	226.25	253.25	269	272.25	264.75	265	259.25	248.25	238.5
2623	2292.5	2274.75	1980.25	1642.5	1432.25	1371	1350	1297.5	1255	1255	1343.5	1517	1666	1666	1704	1705.25	1732.25	1695.25	1776	1801.5	1699.5	1664	1719.75	1671.25	1630.75	1630.75	1619.5	1619.5	1644.5	1715.5	1830.5	2029	2295.25	2389.75	2554.5	2697	2718.5	2663	2663	2522.75	2346.75	2085	2057.75	1898.5	1889	1958	1956	1939.5	1880.5
1083	1364.5	1576.5	1576.5	1414.25	1416.75	1563.25	1566.25	1566.25	1558.75	1424.25	1227.5	1100	1100	1029.5	1029.5	988	1017.5	1029.25	1009	1009	1011.75	1021.75	1043.75	1112.75	1112.75	1123.25	1124.25	1124.25	1142.25	1140.75	1147.75	1212.25	1286.25	1401	1483.25	1488.25	1427.5	1488.25	1489.5	1510.5	1601.25	1741.5	1730	1612.25	1570.75	1429.5	1429.5	1399.25	1314
13874	13570.2	13846.2	14106.8	13632.2	13632.2	13226.5	12082	10872.8	10475.5	9438.5	9438.5	10591.5	10280.2	10865.5	11134	9590	9316.5	10315.5	10315.5	11219	11801.8	12049.5	12208.2	12805.2	13596.2	14087.5	14123.8	14269	14604.5	14191.5	14261.5	14230	13876.5	13410.8	12742.5	12103.2	12052.2	11722	12052.2	12189.2	12404.2	12080.5	12080.5	11813.8	11502.5	11502.5	11647.2	11989	12164.2
1718	1623.75	1582	1591.75	1591.75	1720.75	1778.75	1851	2001	2243.75	2262.25	2273.25	2473	2473	2461	2461	2447.5	2424.75	2255.25	2257.25	2508.75	2678.25	2838.5	2943.75	2985.25	3088	2973.75	2876.5	2749.75	2801.25	2801.25	3119.75	3206	3556.5	3555.25	3232.25	3179	3179	3065	3160	3333.5	3355	3355	3332.5	3059.5	3119	3384.75	4450.75	5395	5953.75
55186	52168.8	48433.5	44720.8	45216.5	44109.5	44109.5	43432.2	42419	42419	42488.8	44466	46471.5	47595	46945	49297.5	50464	50881	50138.5	51771.2	52335.5	51951.8	52667.2	56329.8	59063.2	60136.2	62353.2	62353.2	59118.2	55736	55197.2	53521.5	53521.5	53065.2	52028.8	50540.2	48363.5	48569.8	50479.5	49737.2	50398.8	51654	52413	51155	50759.5	50617	50556.8	48970.2	48663	49962
5062	4337	4080.5	4080.5	4039	3981.5	3926.25	3988.5	4010.75	4135	4160.5	4204	4212	4171.75	4199.75	4199.75	4119.5	3990	3867	3778.75	3843.25	3843.25	3790.25	3767.75	3767.75	3678.25	3678.25	3667.25	3612.5	3572.25	3505.5	3287	3077.25	2831.75	2599	2513.25	2391.5	2180.5	2230.75	2163.75	2163.75	2200.25	2287.25	2462.75	2603.5	2445	2512.75	2607	2610	2617.5
374	282.25	233.25	222	209.75	216.75	207.75	201	201	219	203.75	201.25	204.25	196.5	185.75	185.75	187.25	185.25	184	191	191	179.75	181.25	169.25	167	177	182.5	182.5	182.5	185.25	186.75	183.5	183.75	188.75	185	173.25	170.75	170.75	170.75	178.25	186.5	186.5	178.75	179.75	173.75	164	163.25	171	166.75	158.25
31369	29886	28637.2	27927.5	27324	26861.5	26861.5	26915.5	26877.5	26872.5	26846.8	26847.5	26847.5	27478.5	28036	28036	28054.8	27573	27198	27185	26917.5	26795.2	26997.5	27418.2	27841.8	28880.2	28976.8	29312.2	29420.2	29146	29009	29082	29149.5	29464.8	29840.2	30028	30172.5	30216.2	30101.8	29996.2	30126	30126	29924.5	30072.5	29963.8	29667.8	29497	29608.2	29608.2	29999
9052	9235.75	8655.75	8418	8620.5	8423	8109	7661	7519.25	7062.5	6867.5	7022.25	7057.5	7057.5	7272.25	7499	7525.5	7548.5	7443.5	7426.5	7426.5	7456.75	7696.75	7951.5	7951.5	7619.75	7186.75	6905	6888.75	6906	6838.75	6777.25	6424.25	6285.25	6203	6203	6394.75	6505.75	6693.75	7210.25	7736.5	8356	8740	9008.75	9133.25	9202	9202	8918	8726	8726
28166	30362.2	30362.2	30460.5	29152.5	28242.8	27121.2	25839.8	25661	25661	26761	29501.5	30098.5	30098.5	29736.8	29383.8	28894	28394.2	27608	27775.2	26995	26266	26063.2	26493.5	26365.2	26453	26453	26266.8	25718.8	25448.5	25448.5	25918.5	26646	28887.5	32264	34287.5	35296.8	36249.8	36566.2	36650.5	36852.8	37267.5	37485.8	37719.8	37719.8	37360	37086.8	37165	37244.5	37930.8
12711	13618.8	14299.2	14299.2	13820.8	13649	13062.8	12527	11955.8	11354.5	11433.5	12277.2	12722.2	13465.8	13593.8	13373	13473.2	13155	12547.8	12547.8	13290	13891	14402	14402	14385.5	13937	13580.8	13580.8	13518.8	13151.2	13094.5	13321.8	13321.8	13705	14575.8	15056.5	15583.2	15720.2	16306.8	16579.8	17445.2	17428.2	17513	17513	17337.8	17330.8	17179	17306.8	17417.8	17557.8
52861	44548.2	40155.2	38561.8	38561.8	38561.8	38139	38039.5	38340.5	38340.5	39733.2	41930.2	42889.2	44413.2	45163.2	48309.5	48681	49188	48019.8	46452.5	46194	46936.8	46100	46989.2	48548.5	49416.2	48686	49610.8	49599.8	48741.8	48809	49300	48487.5	46871.8	47983	47869.2	46121.2	47381.8	46786	46786	46465	48094	48629.5	49132.5	49521.8	49591.2	49101.5	48977.5	49305.8	49630.5
9689	9042.75	8639.75	8407.25	8275.25	8274	8193.75	8106.5	8137.75	8143.5	8170.5	8261.5	8343.5	8529	8710.5	8811	8896.5	8896.5	8861.25	8740.75	8736.75	8719.5	8734.25	8777.75	8862.5	8991.5	9044	9124.25	9109.25	8968.5	8838.5	8823.5	8823.5	8902.5	9038.5	9197.5	9276.75	9308	9276.75	9253.5	9202.5	9150	9126.5	9039.5	9110.5	9110.5	9096	9106	9173.25	9288
43988	41281.5	38218.8	36448.5	35673.2	35490.8	35490.8	35802.5	36501	37290.2	37839	37839	38180.2	38660.5	39118.8	38923.5	38848	37643.8	36710.5	36128.5	36096.2	35765.5	35949.5	36281.2	36647.2	36417.5	36417.5	36156.2	35989.8	35636	35131.8	35076.8	35019.5	34841.5	34806.5	34910.2	34805.2	34805.2	34805.2	34504.8	34748.2	34756.2	34517.2	34517.2	34568.5	33952.5	32992.5	32286.5	31865.5	31162.2
9999	9822.25	9159.75	8206.5	7864.5	7864.5	8138.75	9800.5	10140.8	10833.5	10691.8	10761.5	11160.8	11683.8	11460.2	11707.5	11676.2	11384	11264.5	11428.5	11428.5	11886.2	12442.8	12520.2	12664.5	12847.2	12673	12478.8	12478.8	12451	12283.8	12121.5	12082.2	12211.8	12211.8	12211.8	12244.2	12229	12104	12104	12104	12109	12042.2	12008.5	11976	12051.2	12051.2	12043.5	12149.8	12299.5
4801	4501	4325.75	4259.5	4238.25	4189	4140.5	4108.75	4078.5	4078.5	4095.5	4095.5	4054.5	4001	4048.5	4055.25	4002	3987.75	3871.25	3534.5	3225.25	3097.5	3083.5	3083.5	3228.25	3429.5	3429.5	3563	4813.5	6804	7721.25	7968.5	7829.25	7829.25	8331	9190.75	9694.75	9694.75	9618.75	9493.75	9399.5	9162.5	9212.5	9031.5	9051.25	9051.25	9051.25	8943.25	8658.75	8681
5428	5214.75	5085.25	5084.75	4946.75	4730.25	4738.25	4594	4594	4685.25	4930.25	5320	5787.5	5994.5	5994.5	5658.5	5062	4627.25	4388	4157.25	4034.25	4019	3984.25	3895.75	3909.25	3850	3781	3781	3843.25	3755.5	3615.5	3394.5	3341	3341	3411.25	3506.75	3577.75	3651.5	3700.75	3686	3732.25	3766.5	3813.75	3821.25	3852	3874.5	3891.5	3879	3921.5	3933.75
4673	4191.5	3530	2649	2025.5	1750.25	1737.5	1819.25	1885.5	1948.25	2138.75	2265.5	2373.5	2376	2587.5	2875.75	2913.5	2930.5	2958	2850.75	2882.5	3005.75	2819.75	3004.5	3137.25	3010	3085	3085	3085	3008.5	3279	3638.25	3936.5	3876	3987.5	4068.75	4053	4112	4112	3865.25	3724.75	3548.75	3548.75	3722.25	3863.5	4025.75	4242	4290.25	4375.25	4327
15786	14999.5	14805	14602.2	14620	15001.8	15483.2	15947.2	16152	16152	16038	15954.2	15949	15949	16127	16249.5	16249.5	16201	16066.2	16031.5	15878.2	15656.2	15293.5	15112	14870	14798.2	14861.5	14898.5	15156.2	15313.2	15611.5	15882.8	15882.8	16070.5	16165.8	16165.8	16124	15893.2	15893.2	15792	15789	15809.5	15894	15894	15894	15854	16106.5	16135.5	16212	16697.8
167	152.5	145.5	132.5	138.75	148	140.25	143	189.5	302.25	443.25	443.25	342.75	430.5	479.25	497.5	509	631.5	592	648	543.5	743	750	992.25	1457.25	2056	2199.75	2473.25	2456.5	2166.25	1900.5	1769	1572.75	1414	1382	1276.25	1276.25	1372.25	1448.25	1515	1635.75	1740.25	1758.5	1706	1703.75	1593.25	1461.75	1454.25	1443.5	1538.5
18808	12215.8	9284.25	9284.25	9970	11162	12104	12104	11282.5	10428.5	9849.75	9849.75	9870.75	9999.25	10725.2	12267.2	12676.8	13982.5	13181	14558.2	14917.2	15326	15776.5	16287.2	18197.5	18210	18589.8	17500	17500	17500	16131.5	15567	14075.2	14056.2	13088.5	12363.2	11378.8	10830.8	10398.2	9865	9654.5	9654.5	9095.25	9024.75	9024.75	8416.75	8318.25	8543.75	8829.5	9845
235	202.25	184.75	179.75	177	173	173.25	165.75	165.5	157.5	153	150.25	147	142.5	137	129.5	130.75	119.75	120.5	120.5	129	119	117.5	107.5	112.25	107.25	107.25	110.75	114.5	117.75	122.75	117.75	115.5	117.5	112	112	118.25	118.5	114.5	121	126.5	122.75	134.25	134.25	134.5	127.25	129	123	124	122.5
189	154.25	123.25	111.75	111.75	109.75	110	108.25	100.25	98	97	97	101.5	101.5	95.5	94.25	94.25	94.5	106	109.5	112.75	108.25	112.5	104.5	108.5	112	121	114.25	121.75	122.75	124	119	120	114	109	104.75	104.75	106	106.5	115.25	116.25	125.75	131	135.25	139.25	142.25	142.25	134.5	143.25	142
172	146.5	150.75	137.75	137.75	137.5	131.5	124.75	117.75	102	103.5	99.5	99.5	106	107.75	107.75	112.75	103.25	105.5	97	98.75	90.75	99.25	97	103.75	115	115	106.5	109.5	114.5	113.75	111.5	111.5	98.5	99.25	97.75	108.25	108.5	114.5	116.25	113.75	102.5	109.5	112	100.5	96	103.5	94.5	94.5	103
5695	6379.25	7075.75	7758	8178	8708.75	8951	8982	9245.25	9388.25	9660	9387.75	9164.75	8418.5	7787.75	6980.25	6057.75	5403.75	5162.25	5162.25	5443.75	5930.75	6385	6739.5	6870	7209.75	7587.25	8094	8244	8594.75	8598.25	8845.25	9140	9551.25	9900.25	10264	10751.5	10728.8	10937.2	10638.2	10590.8	10321.8	10634.5	10742.5	11154	11323.5	11323.5	11500.2	11606.2	11931.8
18000	16365	15686.8	14710.2	14543.2	14487	14473	13772.8	13907.2	13907.2	14785.5	14562.8	15024.8	15326.8	15488	15923	16417	16697.5	16697.5	16537	16152	15418	15026	14970.8	15073.5	15127.5	15127.5	14905.2	14477.2	13882.2	13553.8	13323	13512.2	13512.2	13453	13314.8	13315.2	13037.8	13037.8	13157	13847.2	14635.2	14917.2	15074.8	15091.8	15061	14945	14937	14937	15014.5
6029	5653.75	5491.75	5474	5402.5	5337.25	5230.75	5225.75	5064	4807	4622	4566.5	4474	4406	4406	4436.25	4620	4699.75	4699.75	4672.75	4624	4445.75	4190.5	4021.75	3899.25	3527.75	2964.75	2619.75	2570.75	2570.75	2610.25	2641.5	2702.5	2802.5	2877	2916.5	2969	3013.25	3040.25	3052	3069.75	3086.75	3110.75	3145.25	3195.5	3259.5	3326.75	3385.25	3420	3430.5
9443	8909.25	8628.25	8450	8358.75	8167.75	7732.5	7469.25	7469.25	7406	7193.5	7140	6803	6658	6701.5	6776.25	6689.75	6777	7222.5	7841.25	8289.5	8395.75	8405	8449	8386.5	8145	7720.5	7543.5	7543.5	7664.25	7772.25	7794.75	7878.25	7815	7747	7647.25	7734.5	9062.25	10866.2	11478	11478	10091	9383	9362.5	9362.5	10274.8	11693	12319.8	12319.8	12407.8
754	673	622.75	584.25	540	497.5	500.5	472.25	497.75	483.5	474.5	428	404.5	404.5	400.75	410.75	407.75	411.75	407.25	408.75	409	409	417.75	412	391.75	384.25	382.5	374.25	362	365	360.75	358.25	363.5	375.5	363.5	355.5	379.75	394.25	394.25	394.25	393.25	340.5	323.75	295.25	295.25	303	323.25	301	323.25	309.5
8185	6883	6852.75	6852.75	7994.25	8899.75	9582.75	9586.75	9586.75	8501.25	5932	4698.75	4394.75	4182.75	4060	4060	4193.25	4310.75	4458.5	4634.75	4742.75	4776.75	4863.25	5005.25	5100	5152.5	5191.75	5191.75	5164.5	5153	5115.5	5077.75	5005.75	4915.75	4827.75	4756.5	4703.25	4681	4695	4706.25	4718.75	4759.25	4784.5	4784.5	4758.25	4737.75	4742.25	4734.75	4774.75	4815
214	177.25	155.5	132	106	92.75	92.75	86.25	84.5	92.25	98.25	98.25	103.75	103.75	100.75	90.5	87	87	94.75	110.5	122.5	124.25	114.5	122.75	111.5	111	114.5	116.5	116.5	122	127	124.5	128	134.25	127	120	121.25	117.5	117	110.75	101.5	101.25	101.25	100.75	95	101.75	101.75	109	111.25	114
21000	18988.8	18233.5	17650.8	16866.8	16382.2	16078	15724	16170.8	16102	16046.5	16269.5	16373.2	16635.8	17280.5	17931.2	18475.8	18838.2	18973.8	19274	19503.5	19590.5	19590.5	19329.8	18797.8	17928.2	17198	16738	16517.2	16417	16513.5	16508.5	16248.8	16095.2	16147.8	15702.2	15402.5	15206	14840.5	14593.2	14373.2	14195.2	14021.8	14021.8	14022	14834	15702.2	16233.8	16512	16629.5
1769	1529.5	1269.5	1173.75	1173.75	1281.75	1377	1515.5	1639.75	1632	1632	1579	1483	1396.75	1284.5	1194.25	1184	1152.25	1188.75	1224.5	1239.25	1238.75	1238.75	1220.75	1222.5	1223.5	1241.5	1257.25	1308.25	1295.75	1303.5	1272.5	1269.25	1269.25	1324.5	1470.25	1555.75	1555.75	1620.5	1621.75	1577.5	1666	1704.25	1623	1551	1591.75	1591.75	1552.5	1595	1624.25
1354	1307	1226	1127.75	1078	1065.5	1065.5	1078	1078.5	1108.75	1140.5	1175.25	1189	1208	1234.25	1241.5	1236.25	1220.75	1165.75	1160.25	1155	1155	1170	1174	1162	1162	1171.5	1176	1172.25	1156.5	1079.25	980.25	970.25	917.5	914.25	918.5	918.5	907.5	923.75	934.5	986.5	999.5	999.5	977.5	946.5	943.75	943.75	942.75	923.75	932.25
9747	9200.25	8750.25	8462	8185.5	8125.5	7798.5	7728.5	7960.75	8239.25	8366.25	8495.25	8495.25	8466	8383.5	8372.25	8259.25	8262.75	8308.25	8227.75	8019	7821	7566.75	7419.25	7419.25	7356.75	7257.75	7320	7575.5	7671.5	7946.25	8047.25	8115.75	8074.25	8149.25	8081	8081	8025	8120	7927	7932.25	7936.75	8008.5	7929.25	7922.5	7911.5	7954.5	7844	8046.5	8236
5731	5881	5668.75	5720	6024	6392.5	6442.25	6690.5	6888.5	7062.75	7087.75	7087.75	7192	7344.75	7574	7781.25	7979	8120.75	8120.75	7977.25	7400.5	6863.75	6473.75	6432.25	6235.5	6062.25	5806.75	5648.25	5614	5614	5742	5959.25	6141	6160.75	6103.25	6133	6252.75	6317.75	6627.75	7172.5	7555.75	7702.5	7809.5	7784.5	7662.75	7540.75	7191.75	7128.25	7318.25	7825.75
11960	13560.5	14450.8	14450.8	14450.8	15060.5	15083.5	16807	17533	17533	16450.8	16450.8	15205.8	15300.2	14350.5	13678.2	12750	12655.2	12655.2	12694.8	12694.8	13506	12843.8	11687.8	11700.5	12819.5	12128.2	12024.2	12221.5	12524	12432.2	12432.2	12089	12393	11325	11012	11712.2	11837.8	12250.8	12454.5	12449.2	12234	12175.2	11248.8	10852	11325.8	11325.8	12839	14009.2	14596
2108	1531.5	1026.25	892.5	810.5	861.75	1058.25	1380.5	1514.75	1787	1969	2017.5	2172	2186.5	2186.5	1872.5	1697.5	1697.5	1695.75	2095	2470.75	2746.75	2656.75	2766.25	2492	2492	2500	2736.5	2821	2821	2765.25	2673	2605.5	2605.5	2569.5	2569.5	2487.25	2341.25	2278.25	2136.75	2177.75	2321	2354.25	2359	2391	2435	2443.75	2531.5	2678.5	2916.25
8357	8452.5	8452.5	8159.75	7966.75	7612.25	7389.25	7273.25	7657.25	7372.75	7198.5	7016.75	6929.75	6929.75	6460.5	6550.75	6967.75	7034.75	7003.25	7164.75	7064.25	7091.75	7250	7174	7174	7407	7358.5	7083.5	7129	7372.5	7308	7050	6990.5	6260.25	5968.75	5715.25	5789.25	6148.25	6303	6627	6627	6627	6504	6491	6036.5	6474.5	6342	6289	6504.5	6621
288	276	268.25	255.5	249.75	243.5	238.5	232.5	232.5	229	235.75	223.5	224.25	211	221	338.5	538.5	583.5	623	621.5	543.25	508	549.25	515.75	473.75	503	525.75	514.5	547	547	602.25	532.5	575	615.5	678.25	610.5	618.25	584.75	502.5	502.25	527.25	545.75	518.25	531.75	517.5	490	445.5	420.75	409.5	408.5
11230	10808.2	10808.2	10246	10246	10152.5	9879.5	9879.5	9889.25	9940.75	10072	10229.2	10636.2	10679.8	10859	10801.8	11416.2	10803.2	10871	11254.2	11046.5	10702.2	10702.2	11009	11032.5	11306.8	11682.8	11937.5	12279.5	12540.2	13027.5	13947.8	14884.2	15692.5	16222	16544.8	16544.8	16395.2	16459.2	16082.5	16082.5	19578.2	25290.8	26970.2	27274.2	24852.5	22995.2	21216	21284.8	21053
2758	2675.75	2640.75	2557.5	2415.75	2209.5	2178.25	2178.25	2328	2449.75	2537.25	2597.75	2597.75	2638.5	2522.5	2452.5	2282.75	2461	2458.25	2500.25	2418.5	2352.25	2302.25	2066	2076.25	2415.25	2546.5	2693.75	2849.75	2865.75	3129.5	3339	3339.75	3422.5	3422.5	3459.25	3565	3614.75	3634.5	3610.25	3723.75	3732	3993.5	4131.75	4131.75	3995.75	3857.25	3809.75	3809.75	3931.25
205	192	171.25	154.75	153.5	158.75	152	152.5	151.75	151.75	149	152.25	159.25	166.5	172.75	172.75	173.75	168.75	162	150.75	150.75	150.75	144	143	155	157	145.25	149.75	155.5	155.5	154	160.75	155.5	143	129.25	123.25	123.25	125.25	132.25	138.25	138.25	137	140.25	146	139.5	146	149.25	157	170.75	178.5
9256	8384.5	7962.25	7872.5	7872.5	8067	8325.5	8697	8697	8573.5	8252	8055.25	8045	7998	8294.5	8385.5	8500.5	8866.75	8990.25	8829.75	8817	8485.25	8295.5	8157.75	8295.5	8103.5	8019.5	8087	8238.25	8230.25	8384.5	8452	8489.5	8489.5	8419.5	8303	8153	7908.25	7645.75	7522.25	7470.25	7478.75	7413.5	7575.5	7842.5	8337.25	9137.75	9873.75	10195.5	10312.2
651	651	632.25	615.75	569.5	565	517.75	498	498	503	527.5	536.5	536.5	522	501.75	501.75	502	509.25	502.5	503.5	469.5	442	433	433	420.75	414.5	416.25	471.5	605.25	676.25	676.25	651.25	606	592.75	564.75	548.75	542.75	521.75	513.5	504	491.75	483.25	479.5	469.75	448.75	448.75	451.5	486.75	500.75	517.25
8178	6886	6235.5	5885	5653	5557.75	5453.25	5234.5	5038	5009.5	4996.5	5105.75	5177.75	5177.75	5064.75	4843.5	4629	4545	4465.75	4442.5	4368.25	4252.75	4110.25	4110.25	3948.25	3791	3676.25	3518.75	3241	2932	2932	2960.25	3161	3366	3366	3480	3534.75	3659.25	3658.25	3658.25	3494.25	3479.25	3461.5	3426	3516.75	3609	3732	3889.25	3889.25	4024.5
14987	13938.5	13392	13086.5	12914.5	12647.2	12465	12402.5	12402.5	12525.5	12708.2	12816.5	12816.5	12816.5	12854.2	12897.2	12802	12790.2	12533.8	12340.2	12194.2	12163.5	12149.5	12204.5	12176.5	12098.8	12037.2	11960	11939.5	12034.2	12120.2	12073	12126.8	12070.8	11846.5	11846.5	12162.8	12524.2	13001.8	13390	13777.8	13834.8	14014.5	14135.5	14205.8	14205.8	14420	14530.5	14609.2	14653.2
16186	15254.2	14571.8	14431.2	14431.2	14562	14815.2	15342.5	16068.5	17204.8	18144.8	18235	18235	18193.2	18193.2	18253.5	19013.2	20306.8	21346.2	21525	21778.8	21907.5	21941.8	21941.8	22111	21967.8	21822.2	21425.5	20829.2	20705.2	20552	20643.8	20863.2	21249	21549.8	22106	22480.2	22878	23026	23026	23079.5	23079.5	23448.5	23804.8	24112.5	24174.8	24339	24229	24229	24015.2
879	762.25	703	542.75	531.25	385.25	385.25	259.25	337.75	514.5	572.5	491.75	591.75	782.75	861.5	1008.75	1077.5	1123	1126.25	1067.25	1027	952	867.75	804.75	846	878.5	886	916.75	943.5	954.5	928	877.75	907.75	865.5	865.5	928	981	1015.75	1052.75	1072	1108.75	1108.75	1084.5	1021.25	976.75	976.75	929.75	873.5	919.75	872.25
7787	7787	7981	8004.25	7362.75	8271.75	7558	7340.25	7326	7326	7326	7370.75	7248.75	6746	7203.75	7203.75	7490.5	7822.75	8183.75	8607	9369.5	10182.5	10581.5	10714.2	10714.2	10880.2	10643.2	10142.8	9847.25	9795.75	9699	9764.25	10723.2	12369	13351.2	13351.2	13391.2	13248.5	13174	13323.5	13680	13398.8	13475	13775.2	13483	13388	13271.8	13271.2	13271.2	13398.5
336	305.5	291	290.25	290.25	290.25	276.5	281.5	276.5	276.5	263.25	263	247.25	247.25	260.25	259.75	259.75	259.75	249.25	242.25	236.5	236.5	232.25	229.5	226.5	231.25	214	221	223.5	231.75	216	222.75	222.75	229.75	228	246.5	252.75	240.5	229	235	222.5	222.5	220.5	229.75	230	232.5	232.5	236.75	236.75	235
6294	5331.25	4840.25	4710.25	4416.25	4197	3847	3895.25	3562.25	3562.25	3636.25	3614.25	3730	4077	4411.5	4364	4417.75	4417.75	4561	4770	4860	4985	5118.5	5267.75	5334.25	5334.25	5308.25	5366	5330.25	5262.75	5313.75	5391.25	5445.25	5412	5497	5506	5527.25	5541	5662.25	5658.5	5644	5488.5	5414.5	5414.5	5410.5	5429.25	5454.75	5469.25	5469.25	5469.25
1547	1445	1390.5	1358.25	1358.25	1370.25	1351.25	1358	1358	1318.25	1301	1287	1263.75	1259.25	1255.5	1227.5	1227.5	1207.5	1181	1205.75	1204.25	1204.25	1204.25	1200.75	1207.25	1182	1182	1215	1224	1229	1229	1194.5	1192.5	1185	1170	1184.5	1226	1213	1213	1264.75	1247.75	1242.25	1270	1270	1270	1268	1233	1191	1184.25	1184.25
1262	1242	1202.75	1096.75	1005	951	906.75	951	1070.25	1277.25	1322.75	1322.75	1400.25	1302.75	1315.75	1297.5	1408.5	1408.5	1385.5	1336.75	1414	1431.5	1517.25	1721.25	1867.5	1951.75	2018.25	2018.25	2018.25	2012.75	2050	2010.5	2010.5	2072.75	2123.25	2117	2117	2024.25	1890.5	1800.75	1741.25	1611	1427	1344.25	1343.75	1408.5	1460	1553	1555	1589.25
234	239.25	239.25	197	135.75	147.5	147.5	202	360.5	539	617.25	591.25	591.25	566.75	526.75	516	465	437.75	430	344.5	203	143.25	134	139.75	140.25	141.75	141.75	141.75	135.25	136.75	145.75	142	152.5	166.25	181.25	188.75	188.75	179.25	179.75	168.5	146.75	146.75	134.25	134.25	136.5	166.5	190.25	195.75	209.25	216.75
5831	5485.5	4980.5	4714.75	4639.5	4570.5	4381.75	4167.25	4167.25	4400.25	4271.25	4241.25	4475	4198.5	4068	3895.75	4078.25	4078.25	4399.25	4559.75	4559.75	4326.75	4259.75	3802	3689.75	3881	4111.75	3931	3931	3893.5	3847	3798	3753.5	3817	3634.75	3402.75	3405	3615	3615	3867.75	3976.75	4191.75	4230.75	4107.25	4058.5	4114.75	4041.75	4057.25	4202.75	4167
133	175	175	166.25	108.5	87.75	84.75	86	84.75	86	81.5	79.5	81	92.5	99.25	122.75	123.25	135	135	137	131.5	131.5	140.75	125	140.25	147.5	146	133.5	154	151.5	140.75	149	151.25	149.5	145.5	149.5	150.25	150.75	148.25	155.25	153	153	159.5	162	155.75	155.75	155.75	160	163	164.25
201	188	165	161.25	176	165.75	176	176	162.75	160	150.5	150.5	149	149	140.5	143.75	139.75	140	143.25	146.5	142.25	137.25	134.75	129.5	123	113.75	118.75	118.75	119.25	126.25	126.25	129.5	126.75	121.5	114	116.75	116.75	127	141.75	142.5	149	155.5	171.5	180	291	528.25	730.5	897.75	1014.5	1082.75
2696	2686.5	2626.75	2507.75	2420	2358.5	2293.75	2221	2170	2210.25	2216.75	2222	2266.5	2295	2316	2335.5	2388.25	2388.25	2411.5	2385.25	2276	2196	2123.75	2019.25	1910.5	1771.25	1548.25	1269.25	1188	1188	1370.5	1718.5	1860.5	1914.75	1891.75	1898.5	1867.75	1812.25	1812.25	1814.5	1905.75	2009.25	2090	2090	1987.5	1912.25	1894.5	1894.5	1962.5	2160.75
4296	3993	3833.5	3725.25	3604.25	3389.75	3388.25	3388.25	3486	3700.75	3707.75	3707.75	3687.75	3651.25	3641	3634.25	3607.75	3436.25	3190.25	3024	2951.5	2878.5	2878.5	2983	2946.5	3085.25	3207.25	3250.5	3308.25	3340.75	3371.25	3448	3418.5	3391	3251.5	3365.25	3260.25	3260.25	3271.75	3258.25	3149.5	3149.5	3102	3086.5	3160.25	3262	3344.75	3439	3501	3504.5
1166	812	616.5	540.75	533.5	508.25	482.75	459.75	416.25	399.5	376.5	376.5	382.25	420.5	438.25	438.25	438.25	475.75	539.75	588.25	644.5	743	839	889.5	889.5	897.25	905.25	894	842.5	824.5	784.75	751.75	763	714.75	683.75	668.25	691.25	691.25	680.5	627	634	564.25	564.25	621.5	687	749.5	802	834.5	832	775.25
342	314	289.5	288	288	288	303	296.75	266.5	255	244.25	244.25	239.25	239	227.25	229.25	223.25	223.25	225.75	229	225.5	229.25	226.25	227.25	222.25	228.25	222.25	222.25	222.25	232.25	222	241	244	236.25	224.5	237.75	243	248.25	249	249	245.75	245.75	239.5	228.25	222.75	197.25	186.25	193.5	194.5	194.5
5789	5548.5	5208	4838.75	4586.25	4568.5	4568.5	4677.5	4696.75	4795.25	4769	4708.25	4806	5030	5105.5	5311.75	5461	5742	6034.75	6450	6481.5	6528.5	6528.5	6446	6518.75	6872.5	6981.25	6813.5	6995	6894.5	6894.5	7126.75	7196.5	6934	7074	6904.25	6780.75	6476.25	6123	5806.25	5762	5762	5897.75	6148.25	6206.25	6247	6213.25	6288.75	6288.75	6490.25
9606	8920	8101.25	7012.75	6926.75	6926.75	7839	8022.5	8174.5	8237	8349	8434	8893.25	9273.75	9273.75	8942	8564.75	8360.75	8205.25	7908.5	7846	7846	7699	7502.75	7302.5	7135.25	7135.25	7516.75	7836.75	7929.5	7929.5	7796.5	7732.75	7732.75	7705.5	7801	7812	7812	7670.25	7628.75	7628.25	7485.75	7535	7666.75	7701	7668.5	7767	7782	7995.5	8345.5
2054	704.25	232	197	207.25	154.5	121.25	123	118.5	110.75	128.5	192.25	175	276.25	356	326	303	303	331	232.5	171	176.25	201.5	165.25	201.5	202.75	188	173.5	201.25	181.5	190.5	198.5	223.75	225	243.25	253.5	253.5	245.75	253.75	263	281.75	284	306.75	313.5	340.5	339.25	342.75	347.75	326.5	321.75
63552	61937	61183	57233.2	55094.8	52063.8	52063.8	54201.8	54300.2	55395	59425.5	57530	60380	61873.5	60380	58118.8	58487.8	56546.2	53955	52101.2	49709.8	48901	46951	46654.5	46654.5	49002.5	50071	52657.8	54863.2	56045.8	56451	56614.5	57835.5	59878.5	61086.8	59850.2	60217.2	58335.2	56146.5	56054.2	55515.5	53593.2	52332.8	54015.2	53953	55606.5	55055.2	56770.2	56770.2	57117.2
12160	13903	18376.8	19860	16869.5	15565.8	18625	15896.8	15734.2	16748	16431	16431	18442.5	18584	21475.5	22213.5	23378.2	24262.5	25597.8	25880.2	26064.2	25897.2	26119.2	26969.8	28611	28982	30000	30000	31016	31952.5	32449.2	33031.8	33529.2	33928.2	33925.8	33925.8	34125.5	33539.2	33539.2	32708.5	33542	32600.5	32428.8	31026	29470.8	29329.8	29653.2	30449	30449	33065.5
114	111.25	105.75	105.75	106.25	101.5	102.25	102.25	102.25	98.5	95.25	86.75	88	88	90.25	95.5	101	98.25	102.5	103	106	102	104	104	107.5	106.5	104	109.5	103.25	96.75	91.25	98	91.25	91.25	93	89.25	89.25	90	108.25	89.5	89.5	86.75	88.75	88.75	88.75	93.25	98.75	199.25	200.25	200.25
1121	1108.5	1108.75	1051.75	982.25	934.5	911.25	895.5	866.25	862	889.75	898	879	885.75	902.5	933	980.5	980.5	972.25	928.75	890	855.5	822.25	821.75	762.25	762.25	733	749.75	803.25	835	804	804	779.75	769.25	769.25	788.25	865	865	925	882.25	865.75	818.5	846.25	799.5	846.25	822.25	807.5	791	833	833
8411	6848	4847.5	3244.75	2654.75	2372	2029.75	1993.25	1986	1852.5	1952.75	1813	1934.25	2534.75	3138.75	3888.25	4287.5	5191.75	5425.25	6275.5	6911.5	7570.25	8203.5	8314.75	8314.75	8174.5	8108.5	8074.25	8109.25	8061	7801.75	7797.75	7753	7753	7753	7675	7653.5	7693.5	7409.5	7518	7694.5	7694.25	7667.25	7667.25	7497.75	7503	7372.5	7254.75	7249.5	7336.5
5264	5224.25	4828.25	4395	4639	4982.75	4982.75	5483	5483	5552.75	5528.75	5468.75	5701	5712.5	5538	5527.5	5646	5447.75	5463.25	5463.25	5482.75	5356.75	5322.5	5468.25	5134.75	4760.75	4307.25	3996.25	3996.25	4094.25	4288.25	4532.25	4565.25	4716.75	4670.25	4499.5	4472.25	4718.5	4366	4414.5	4756.25	4897.25	4675.25	4675.25	4946.75	4895.75	4895.75	4951	5019	4945.75
6121	6121	6063.25	5941.25	5918.25	5372.25	3998.25	5014.75	5094.75	5196.5	6293.25	6293.25	6223.75	6223.75	6117.5	6406	5893	5893	5496	4834.25	3508.5	3013.25	2929.25	2929.25	3651.5	5868.75	7095.25	7424.5	6997.5	6658.25	6562.75	6674	6315.25	6464	6869.25	6716.5	5810.75	6319.75	6202.5	6081.75	6306	6306	6701.75	6793.25	6962	6962	7300.75	6943.75	6980.5	7166
1061	1213.75	1257	1302.5	1334.5	1330.5	1318.5	1362.75	1362.75	1347.75	1275	1331.75	1339.75	1342.75	1466.5	1548.25	1558.75	1578	1545.75	1530	1535.5	1536	1549.5	1522.5	1514.75	1496.75	1500	1500	1528.25	1562	1590.25	1590.25	1553	1529.25	1456	1419	1419	1423.75	1423.75	1428.75	1464.25	1505.75	1519.5	1495.25	1499.25	1482.75	1471.5	1471.5	1460	1464
187	201.5	226.5	234.75	219.5	215	195	188	184.25	190	198.75	206.75	219.25	230.5	243.75	254.25	260.75	272.5	272.5	264.5	247.75	259.75	259.75	273	274	274	264	264	737.75	1753	2255.25	2270.5	2270.5	2270.5	2263.25	2265.75	2331	2307	2357	2330	2330	2316.25	2301	2301	2295.75	2295.75	2241.25	2266.25	2247.75	2250.25
18086	16868	15392.8	15392.8	15438.8	16602.8	17366.8	17459.2	17364.5	16994.5	17152.5	17113	16945.2	17135.2	17135.2	16739	15989.2	15386.8	14970.5	14553.8	14468.8	14360.5	14360.5	14054	13657.5	13510	13136.2	13238.2	13215.5	13040.2	13040.2	13271	13396.5	13706.2	14850.2	16944.2	18339.2	18339.2	18480	18301	18190	18073	18007	18059.5	18495.8	18548.5	18716.8	18821.8	18938.8	19164.5
3910	3742	3477.75	3188	3161.75	3126.75	3027.25	3027.25	2975.5	2833	2662.5	2582.5	2604.5	2700	2666.25	2685.5	2685.5	2642	2588.5	2554	2525.5	2525.5	2420	2237.5	2294.75	2617	2685.25	2844.75	2897.75	3034.25	3087	3366.25	3681.75	3870.25	3836.25	3933.25	4013	4059	4459.25	5069.25	5753.25	6116.75	6116.75	6190.25	6190.25	6368.75	6614.25	6639.25	6664.5	6598
704	613.25	541.25	509.75	497.5	502.25	489.25	465.5	459.5	466	466	468.25	469.5	470.5	473.25	455.5	455.5	458	457	457	471	471	471.75	473.25	448	443.75	454.75	457.75	444.25	450	442	448	457.75	456	483.5	485.5	441.75	429.75	420.5	420.5	407.5	420.5	395.5	395.5	354.5	309.5	291.5	282.25	267.75	288
18484	25584.5	42405	57616.5	63679.8	66604.8	67694.8	67737.8	67737.8	65428	64405.2	63315.8	61616.8	56119.5	46494.5	40634	37565.5	34011	33149.8	27168	24127.2	23614.5	23614.5	24479.2	25072.5	25317	25381.5	25510.2	25824	26268	26941.8	27681.5	28366	29264.8	30080	30775	31618.5	32341	32921.8	33473.8	33928.8	34441.8	35131.2	36021	37063	38277	39725.5	40976.8	41345.8	41662.8
562	562	713.75	965.25	1057.25	1057.25	1023.5	1020	1020	1112.5	1232.75	1245.5	1300.5	1271.75	1278.75	1307.5	1327.25	1376	1940.5	3379	4881.5	5505	5649.5	5649.5	5492.25	5199	4713.75	4229	4087	4048	4250	4393.5	4442.25	4526.5	4694.75	4827	4869.5	4931	4933.75	4972.5	4924	4924	4896.75	4849.25	4813	4649.25	4589.25	4589.25	4813.75	4969.75
301	296.25	321.25	311	272	276.75	256	244.25	242	246.5	243	250	255	254	257	264	266	261	256.25	239.75	236	231.25	245.5	254.75	254.75	251.5	250	243	243	243	244	243	253	250.5	263.25	267.75	267.75	255.75	245	245	231.25	237.75	254.75	254.75	246.25	256.25	255.25	257	257.25	261.5
10048	9027.75	8508.25	8297.5	8067.25	7970	7791	7673.5	7747.5	7870	7824.75	7975.25	8070.5	8108.75	8331.25	8537.5	8731	8731	8757.5	8733.75	8724.75	8681.25	8760.5	8840.5	9331	10242.5	10650	10662	10662	10685.2	10644.2	10708.5	10776	10803.2	10917.8	10917.8	10761	10552.5	10567.8	10485.5	10636	10891.2	11533	12482	13355.5	13948.2	13845.8	14247.5	14412.5	14482
3507	2925.5	2467.25	2270.25	2096.25	1893.25	1810.75	1785.75	1813.5	1881	2050	2167	2167	2037	1967	1962	1902.25	1898.5	1886	1926.25	1926.25	2056	2230.25	2285	2285	2269.5	2224.25	2123.5	2064	1970.5	1902.5	1869	1709.5	1686	1500.75	1503.75	1631	1739.25	1832.75	2019	2250.5	2298.5	2297.75	2187.5	2141	1953.75	1953.75	2024.25	2328.25	2507.25
2457	2162.25	2021.75	1903.5	1734	1747.5	1655	1918.25	2081.25	2093.25	2645.5	3780	4339.25	4837	5069.25	5011.5	4604.75	4352.25	4409	4182.25	4083.25	4141	4037.25	3925.75	4074.25	4350	4091.75	4350	4329.75	4348.5	4456.75	4675.75	4741.75	4990.75	5258.5	5580.5	5580.5	4929.25	4950.75	3265	2303.25	2303.25	2111.25	2111.25	2936.75	4673.75	5732	5732	6195.75	6113.5
183	155	142.5	142.5	137.25	129.5	126.75	126.75	126.75	125.25	127.25	105.75	126.75	119.5	117.5	112.5	113.5	113.5	105.25	115	122	124.75	119.75	126.5	127	129.25	132.25	132.25	127.25	132.5	124.5	125.25	130.75	125	120	120.75	105	105	116.25	104.75	111.25	116.5	110	101.75	107.75	107.75	102.75	110.25	117.5	126.25
1415	1415	1335.5	1188	1090.5	1034.5	928.25	941.25	789.25	754	776.5	888.25	726.25	734.75	825	825	789.5	889.5	889.5	806.75	771.75	620.75	620.75	720.75	758.75	770.75	784.5	815	1064	1279	1422.25	1481	1509	1509	1428.75	1390.5	1349.75	1301.25	1318.75	1341.75	1324.75	1310.75	1322.5	1322.5	1362.5	1517.25	1847.75	2143.5	2143.5	1861.5
20329	20158	19980	19732	18631.8	16407.2	14428	14160	14160	14681.2	14944.2	15332.2	15697.2	16309.5	17288.5	17288.5	17171.8	15677	15687	14840.2	15384.2	14782.5	15792.5	16210.2	18270.8	19708.5	19815.2	19417.8	19536.8	19766.2	19597.8	19830	20157.5	20256.8	20429.5	20894.8	21370.8	21417.2	21417.2	21330.2	21167.2	20820	20513	20111.5	19662	19590.2	19196.8	18860.5	19421	19739
275	275	248	232	244.5	230	228.5	207	212	212.75	222.25	227.5	230.25	224.75	221	220.75	220.75	217.5	208.75	209.5	202.25	194	196.25	202.75	185.25	177.25	177.75	183	183	745.25	745	744.25	729.75	169.5	169.5	179.5	184.5	196.25	200.25	190.75	190.75	190	184.25	175.25	195	181.25	184.5	186.25	186.25	182.5
2145	2065.25	1940.5	1831.25	1747.25	1698	1657	1746.5	1697.5	1705.25	1774.25	1824.5	1838.25	1905	1987.5	2093.25	2093.25	2081	2071.5	1951.75	1912.25	1877.75	1816.75	1804.75	1796.25	1777.25	1785	1762.25	1762.25	1823.25	1820.25	1894.5	1903.25	1889.25	1876	1912.5	1965.25	2031.25	2086.75	2166.25	2087.75	2034	1964	1780	1704	1704	1741	1748.5	1764.5	1802.5
2104	2110.25	2110.25	2028.25	1861.25	1831.5	1831.5	2036.75	2329	2412	2412	2335.75	2335.75	2416.5	2772.75	3158.75	3420	3478.75	3602.5	3518.75	3420.5	3030.5	2628.5	2335.25	2129.75	2089.5	2071.25	2115.5	2156.5	2156.5	2129.25	2153.25	2175.25	2197	2291.75	2334.25	2423.5	2653	2856.75	3007.25	3118.5	3125.75	3125.75	3022.75	2882.25	2731.25	2710.5	2696.75	2773.5	2853
578	586.25	586.25	572	534	504.25	496	483.25	483.25	487.5	460	458.5	499.25	458.25	445.75	474	472.75	444.25	444.25	461.25	449.25	423.75	445.25	489.5	461.75	476.75	531.5	528.75	476.25	531.25	496.75	480.75	480.75	539	579.75	743	728.25	804.25	820.25	824.75	719.75	719.75	588	487.75	466.25	440	421.25	421.25	431.25	432.25
7758	7502	7159.25	6875.75	6678.75	6632.5	6632.5	6528.5	6475.5	6465	6544.75	8693	11248	12195	12195	11260	10990.5	10420.2	10386.8	10599.8	10423	10423	10527.8	10642	10742	10742	10549.5	10710.5	10803.5	11077	11077	11380.2	11233.2	11316	11223	12126.2	13716	15005.2	14605.2	14605.2	14422.5	13682.5	13207	12644.8	10279.5	6878.5	5438.75	5384.25	5663.5	5759.5
4507	4481	4481	4502.5	4502.5	4455.25	4512	4459	4459	4659.5	4845.25	4816.5	4842	4637.25	4637.25	4478.75	4449.25	4419	4548.25	4548.25	4581.75	4613.5	4613.5	4551.25	4551.25	4591.25	4574.75	4539.25	4595.25	4547.75	4530.25	4533.5	4613.5	4579.5	4589.5	4622.75	4622.75	4599	4583.75	4489.75	4374.75	4262.25	4155.5	4233	4226.25	4245.5	4920.75	8669.5	15203.5	19810.8
18323	17411.2	16418.2	15335	14317.8	13851.5	13455.5	12656.2	12336	12336	12464	12830.2	13311.2	14121	14726.5	14844	15045.2	15045.2	15086.2	15006	15112.5	15018.2	14852.8	14827.8	14827.8	14827.8	14700.5	14445.2	14153	13925.2	13823	13686.8	13431.5	13185	13311	13311	13311	13119.2	12978	12588.2	12190.5	11640.8	11296.5	11162.5	11208.8	11275.8	11671.8	11996	12279.8	12629
3027	2858.75	2747	2593.25	2362	2138.75	2002.25	1977.5	1977.5	2082.75	2178.75	2296	2363.25	2359.75	2289	2338.25	2348	2274	2145.5	2129.5	2109.75	2109.75	2182.25	2182.25	2176.75	2087.25	2087.25	2104.25	2185	2282.25	2282.25	2293.25	2313	2313	2313.25	2313.25	2304.5	2292	2267.25	2211.75	2107.75	2024	1954.75	1954.25	1954.25	2025	1993.5	1993.5	1875.75	1875.75
11661	10504.2	9786.5	9466.25	9466.25	9466.25	9356.75	9242.75	9127	8954	8753.5	8472.5	8279.25	8185.75	8027.25	8027.25	8139.25	8542.75	8648	8648	8360.5	7879.75	7412.5	7121.75	7121.75	6794	6705.75	6506.25	6506.25	6516.75	6516.75	6551.75	6844.25	6594.25	6787.25	6846.75	6719	6614.5	6614.5	6533.25	6533.25	6569.25	6493.5	6477.25	6386	6243.25	6079.75	5871.25	5743.5	5743.5
1387	1387	1341.25	1234.25	1335.5	1192.25	1180.25	1094	1125.25	1125.25	1207.25	1207.25	1303	1365	1297.5	1271	1366	1271	1163.5	1107.25	1090.75	1071.75	1090.75	1084.5	1072.75	1089.75	1114.5	1126	1169.25	1200.25	1223	1223	1224.5	1268	1284.75	1259.25	1259.25	1252.5	1190.75	1147	1125	1112.5	1112.5	1099.25	1031.75	1037	1126	1056	1106	1114.5
13114	12155.5	10424.8	9289	8376.25	8220	8220	8220	8557.75	9902	10713.5	11914.5	13467	14609	15259.8	16105	16105	15591.8	15280.2	14875.8	14588.5	14372	14372	14866.2	16174.5	17219.8	17873.5	17853.2	17853.2	17113	16211.2	15711	15711	15605.8	14742.5	13944	13173.5	12927.2	13109	13688	15533	17138.2	17926	18196.8	18573	18573	17770.5	17833.5	18230	17578
210	117	87.25	86	86	92	95	119.5	178.75	212.75	243.5	263.75	264	243.75	256.25	239.75	202.75	152.5	114.75	95.5	95.5	85.75	96.25	121.5	151.75	161.25	175.5	175.5	165.25	184.75	184.75	188.25	229.25	249	268.5	287.25	287.25	257	253.5	228.25	228.25	237.25	248.5	251.5	251.5	251.5	265	273	268.75	286.5
1945	1985.75	1990.25	2036.5	2036.5	2134.75	2423.75	2713	2935	3033.5	3077.75	3153	3320.75	3435.75	3446.5	3446.5	3342	3142	3022.25	2901.5	2673	2367	2066	1959.25	1938.75	1938.75	1953.5	1947.75	1947.75	1984.75	2040.75	2153	2351.75	2550.25	2480.75	2660	2774.5	2774.5	2792.25	2845	2936.25	3040.25	3136	3377.25	3719.75	3961.25	4113	4228.25	4228.25	4123
9200	10232.5	10973.2	11013.8	10986.5	10986.5	10430.8	9752.5	9385.25	9385.25	9504	10083.8	10674.8	11076.5	11481.8	11595.2	11884.2	11991.8	12274.5	12058	11969.5	11301.8	11414.8	11520	12399.5	12966	13054.2	13109.5	13291.8	13412.2	13809	14610.2	14915.8	15096.8	15108.5	14993	14863.8	14821.8	14463.8	14190.8	13981	14184	14297.5	14449	14902	15210.5	15324.2	15242.5	15329	15330
220	197	185.5	177.25	175.75	178.25	175	175	167.25	163.75	162.75	143.25	151.25	150.5	129.25	118	128.75	129.5	149.25	149.75	166.5	168.75	156.25	139	147.75	147.75	150.25	150.25	150	152	146	146	144.75	149	146	142	141.25	143.25	144.5	144.5	149.25	150.75	155.75	155.75	155.75	153.5	162.25	150.75	142.75	148.25
36091	35491.2	34333.8	33484.5	33421.2	33258.5	33321.5	33295	33187.5	33181.2	33277	33236.2	33453.2	33959.8	34633.5	35019.8	35279.8	35692	35646.2	35350.5	35153.8	34524.2	33865.8	32383.5	30615.2	30573.2	30573.2	31766.5	32711.8	32980.5	33283.5	34228.2	34774.2	34848	34848	34266.8	34080.2	33395.2	31888	30417	29564.5	29199.2	29067.5	29063	29064	29517.8	31114.2	32881.2	33775.8	34202.2
7102	6290.25	5560.5	5157	5157	5450	5890	6096.25	6129.25	6096.25	5951.25	5648	5541.5	5473.25	5541.5	5677.75	5708.5	5772.5	5805.5	5844.5	5844.5	5849.25	5822.75	5822.75	5727.25	5727.25	5716.25	5692.25	5759.5	5886	5827	5822.5	5816	5701	5701	5678.25	5677.25	5654	5634.25	5509.5	5362.5	5221.5	5221.5	5302.5	5316.5	5250.5	5236.25	5080.75	4987.5	4987.5
2932	3058.75	3058.75	3072.75	2994	2912.75	2879	2836.25	2725.5	2534.25	2316.75	2112.5	2193.5	2047.25	2047.25	2051.25	2284.5	2494	2611.75	2505.25	2605.25	2610.25	2629	2630.75	2649.75	2684.75	2653.75	2653.75	2753	2885.75	3020.25	3036.25	2996.75	2990.25	2972.75	2889	2871.5	2854.5	2853.25	2812.5	2766	2664	2556	2518.5	2518.5	2330.25	2004.75	1808.75	1808.75	1842.75
139	130	127.5	119	114	114	114	114.25	108.5	100.75	91.75	96.75	101.75	137.75	148	150.25	136.5	127.75	127.75	122.25	123	125	130	123.75	123.25	116	120	119	120.75	125.5	130	126.75	131	129.75	138.75	132.5	139.75	137.25	137.25	131.75	136	124.5	123.25	122.25	126.25	126.75	132	142	158.25	167.5
16565	16607.8	16386.8	15971.8	16275.8	16336.2	16006	15923.2	16003.8	16003.8	15950.2	15830.8	15471	15239.2	15222	15222	15323.5	15518.8	15816.2	16749.2	17997.5	19052	19103.8	19150.8	19225.8	19522.5	19147.2	19498.5	19565.5	19512.5	19245	19161.8	18270.5	16807.2	16195.8	16195.8	16315.2	16271.5	16271.5	16328	16337.8	16490.2	16613.5	16613.5	16689.5	16716.8	16764.5	16722.2	16946.2	17096.5
9528	8979.75	8440.25	8096.5	7848.5	7723.5	7611.5	7596.75	7607	7510	7465	7469.5	7469.5	7492.75	7601.25	7611.5	7642	7647.5	7555.5	7547.5	7515.25	7404	7286	7236.75	7107.75	7107.75	7045.75	6944	6854.5	6854.5	6740	6598	6598	6569.25	6615.75	6695	6712.5	6712.5	6759	6794.5	6794.5	6794.5	6707.75	6707.75	6696.5	6737.75	6724.75	6811.5	6775	6735.5
254	253.5	248.75	229.75	224.75	211.75	204.5	213.5	215.5	205.5	194.5	204.5	182	183.5	188.25	202	189.5	189.5	181.5	185.5	180	171.5	175	177.5	178.75	188.5	192.5	197	194.75	195.25	189	185.5	185.5	176.25	176.25	180.5	193.75	191.25	201	194.25	195.25	195.25	195.25	192	197.5	193.75	194	213.75	219.75	213.25
59636	56861.5	55292.2	54244	55292.2	55306.5	55241	56410.5	58255	57252.2	57991	59315.5	59699.2	59699.2	61890.8	63076.8	63076.8	62954	63042.5	62245.2	61349.8	61423	61368.5	60932.8	60932.8	61842.2	63589.8	64421.5	64421.5	63009.2	58915.5	55192.8	53844.2	53141.5	52195.2	51640.8	51640.8	51640.8	51649.5	53382.8	57284.2	60167.2	62107.5	64815.8	67579.5	70071	70932	71984	73200.5	74652.2
41083	39742	37693.8	35660.2	33892.5	32939.5	31951.5	31438.2	30284.2	29607.5	28967	28642.2	28642.2	28327.2	28327.2	28593.8	28907.2	29805.2	29847	29807	29383.2	29631.2	29631.2	29896	30087.5	30392	30714.8	31369.8	32516	33427.2	34632.5	36427	37351.2	38127.8	40289.8	43587.5	46566.2	47979.2	47992.5	47981.8	48568	49249.8	50668.5	52133.8	53211.5	54618.8	55603.8	56444	57627	58843.2
27611	26328.8	26037.2	24717.2	23364.2	22658.5	22273	21736	22418	23071.2	23439.2	24069.2	24197.2	24042	24168.5	24614.2	24953.2	25267.5	25267.5	25149	24910.8	24665.2	24275.5	24665.2	24468.8	24364.2	24106.2	23872.2	22745.5	22754.2	21809.2	22799.8	22731.8	23349.8	23038.2	23582	23577	24185.2	24696.2	24696.2	24986.8	25060.5	24466.8	24123.2	24123.2	24123.2	24050	24515	24815	25085
2553	2478.25	2374.5	2371	2347.75	2378.75	2435.25	2511.5	2577.5	2614	2635.75	2619.5	2619.5	2657.25	2667.5	2749.5	2771.75	2742.25	2671.75	2703	2703	2641.75	2696	2817	2779.5	2796.25	2893.5	2877.75	2832.25	2909.75	2850.25	2771.75	2728.25	2798.75	2798.75	2842.75	2861.5	2948.25	2954.75	2864.75	2760.25	2572	2373.5	2282.75	2237	2237	2335.25	2533.5	2645.25	2793
5472	5472	6370	7145.5	6901.75	7816	7564.5	7700	7153.75	7523.75	7153.75	7184.75	7539.5	7366.5	7440.25	8054.5	8411.5	8521.5	8787	8459.75	8747.5	8233.25	8583.75	7715.75	7835.75	7126.5	7212.75	7212.75	7481.5	7828.25	7914.25	8843.5	7914.25	7993.75	7465	7975	7674.25	7987.5	8210.5	8374.75	8210.5	7983.25	7178.25	6254.5	6154.75	5732.25	5795.75	6352.5	6786.25	7105.25
2595	2226.25	1863	1776.75	1945.5	2143.75	2171.25	2171.25	2182	2097	2097	2305.25	2594.75	2667.5	2740.75	2740.75	2729	3048	3048	3123.25	2881.25	2576.75	2576.75	2850.5	3029.25	3205.75	3231.25	3212.25	3212.25	3170.75	2950.5	2755	2729.25	2729.25	3083.75	3125.5	3381.25	3406.75	3224	3169.5	3209	3096.25	3150	3418.5	3129.25	3465	3756.25	3756.25	3863.25	3945
3519	3300	3199.75	3108.25	3020.75	3019.75	2982	2982	3084.75	3073.5	3062.75	2884.5	2564.5	2338.75	2193	2171.25	2171.25	3201.75	4633	5262.25	5262.25	4833.25	4682.75	4616	4616	4694.75	4923.25	5230.25	5529.25	5773.25	5812	5854.25	6042.25	6042.25	6042.25	6195.5	5964.5	5662.5	5678	5508	5508	5541.75	5584.25	5684.75	5836	5847.5	5962	6089.25	6371.25	6701.25
29478	25348.2	22146.5	20714.5	19166	17910.5	17430.5	17430.5	17430.5	17364	16525.8	16294.8	15379.8	14725.2	15125.8	17313	15400.8	17600.5	17847.5	18221.8	16652.5	18408.2	18408.2	19321.5	19680.2	20371.2	20926.8	20926.8	20823	20204.8	19782.8	19782.8	19436.5	19866	19452.2	19145.2	19073.2	19073.2	18506.5	18796.2	19727	20236.8	21213.5	21565	21857.5	21857.5	21590.5	21783.5	21162.5	21065.5
47527	45028.8	42728.8	39433.8	34801.8	31950.8	30849.2	29422.2	28140.8	28031.8	28031.8	28468.2	29673	32527.5	36714.8	39074.5	39074.5	38799	37055.8	35520.8	35520.8	35515.8	36540.2	37223.8	38895.5	41791.5	42655.5	43432	43169.8	42166.2	41363.8	41973	41973	43095.5	45335.8	46486.8	47230.2	46610.8	47576.2	47875.8	48975	50066.8	50710.2	51180.5	51158.5	51983.5	51913	50902	50775.5	50850.5
27427	24414.2	18461.2	13743.8	11123	9829.75	9714.5	10018.2	10357.8	10875.8	11729	13482.2	16440.8	20068.5	23332.2	25267.2	26237.5	26918.8	27233.8	27352.2	27379.2	27380.5	27557.8	27942.5	28333.8	28672	28723	28988.8	28988.8	28988.8	28824.2	28924	29060.8	29060.8	28983.5	29107.2	29089.2	28847	28847	28726.5	28638.2	28518	28532	28998.5	28976.5	29569.2	29569.2	29525.8	28917.2	28665.2
9432	8471.25	7517.25	7024.25	6836.75	6633.5	6633.5	6446.5	6538.25	6850.25	7024	7030.75	7078.5	7078.5	7180.75	7139.75	7124	7219.75	7219.75	6951	6558.5	6604.5	6596.5	6948	7136.75	7136.75	7136.75	7289	7422.5	7452.25	7592.75	7574	7574	7796.25	7805.25	7925.75	8052.75	7900.5	7678.75	7640	7687.75	7586.75	7588	7438.75	7475	7213.5	6829.5	6270	6424.5	6289.5
80	79.25	80.25	84	75.25	75.25	65.75	68.75	65	72.25	72.25	71.75	73.75	71.75	66.75	66.75	72.75	69.5	72.75	74.25	74.25	69.5	67.5	60	60	61.5	62.25	57.75	65.75	77.25	74.5	79	79	76.5	71.75	68.25	68.25	68.25	63.75	63.25	64.25	64	64.75	66.25	66.25	67.25	71.5	82.75	83.5	84
3758	3327	2986.75	2922	2708.75	2633.5	2641.25	2654.75	2654.75	2711.5	2720.75	2720.75	2677.5	2618	2621.75	2659.75	2640.25	2667.75	2621.5	2482.5	2455.25	2524	2455.25	2454.75	2368	2350.5	2264.75	2263.5	2345.25	2377.75	2377.75	2389.5	2387	2414.75	2461.75	2418.5	2478.5	2462.5	2296.75	2236.25	2313.25	2167.75	2185.75	2193.25	2139.25	2139.25	2212.75	2325.25	2431	2431
15807	20718.8	18194.8	20777.2	20777.2	20673.8	20540.5	21267.8	21267.8	21267.8	20726.8	21100.2	21433	20430	20430	20087	20087	20380.2	21733.5	21934.5	22180.5	21521.5	20553.8	20519	19613.2	18513.2	19019.8	18966.2	19344.5	19344.5	19448.5	18940.2	18856.8	17649.5	17936.5	18026	18026	18964.2	19925.2	20149	20242.5	20020.2	20020.2	20255.5	21256.5	22339.2	22821.2	22821.2	22568.8	22363.5
4105	3825.25	3646.25	3497.25	3420.75	3390.5	3360	3353	3332.25	3319.5	3294.5	3302	3302	3221.5	3202	3294.25	3301.75	3298	3298	3291.75	3233.25	3153.5	3120	3080	3080	3075.5	3127.75	3185.75	3242.75	3264	3264	3264	3245	3268.25	3320	3330.25	3318.25	3342.5	3353.5	3326.75	3326.75	3358.5	3330.25	3216	3181.5	3181.5	3102.75	3020.75	3003.5	3003.5
775	3394.75	4997.5	5116.25	4770.25	4086.25	4093.75	3763.25	3138.25	3138.25	3628.5	3907	4285.5	4632.75	4590.5	4590.5	4634.5	4384	4213.75	4240	4526	4529	4750	4756.75	4668	4476.25	4241.75	4019.75	3864.25	3845.25	3845.25	4011.5	4187	4287.25	4293.5	4331.25	4335.25	4388.5	4359.75	4575.5	4310	4508.5	4552	4764.25	4710.75	4765.75	4722	4722	4698.25	4669.5
217	197.75	183.25	173.25	175.25	177	178.75	178.75	196.75	177	180.5	174.5	175.75	172.5	172.5	168	168	168	170.25	180.25	180.25	189.5	205	193	193.5	205.25	203.25	203	215	230.25	400.25	400.25	403	407.5	223.5	223.5	240.75	321.5	337.25	374	374	285.25	282.5	268.5	262.5	286.25	286.25	262.25	259.75	243.75
441	502.75	638.5	616.75	611.25	512	382.25	382.25	425	667.5	702.25	665	910.25	1122.5	1122.5	1802.25	1842.75	1325	1325	1065.5	1037.25	972.5	960.75	923.75	934.25	991.75	1024.75	1418.25	1418.25	2239	2360.5	1692.5	1208	1329	1329	1726.25	2775.75	5329	9411	11590.8	11750.5	11771.2	11699.8	11661.8	11531.8	11354.5	11209.8	11090.2	10996	10990.8
205	169	151.25	141.5	142.25	138.25	138.25	139.75	149	149	146.5	151.75	154.75	140.25	152.25	162	152.75	152	158.25	160	158.5	160	159.25	159.75	162.5	168.5	175.5	175.5	177.5	176	168	168	168	163.5	164.25	177	188.75	203.5	204	202	197.75	181	176.25	176.25	179.25	182.5	182.5	178	171.25	172.5
94330	85558.2	81099.2	78828.2	76619.8	74898.8	74223.2	73831.5	73706.8	72834	72321.2	72065	71831.8	71638.8	71295.5	71256.2	71182.8	70876.5	70767.5	70451	69922.2	69922.2	70007.8	69593.2	68291.2	68291.2	67711.8	67711.8	68256.8	69207.5	69930.5	70173.8	70173.8	70173.8	70550.5	71839	73388.5	74470	75254.5	75254.5	75506	75556.5	75826.2	75874.2	75874.2	76150.5	76503.8	76649.8	77519.5	78574
29365	29443.5	29650.5	29518.5	28427.5	27979	27412	26871.2	27016.5	27054.8	26888	26631	26625.5	26128.8	26128.8	26128.8	25888.5	25711.5	25673.5	25673.5	25673.5	25593.2	25851	26623.5	26080	26713.2	26771.5	26700.8	26326.2	26356.5	26046.5	26162.5	26162.5	26731	27348.8	27693.8	27982.5	28329	28559	28832.5	29390	30125.8	30775.5	30936.2	31142	30969.5	31141.5	31184	31184	30979.2
13758	11811.8	10863.2	10635	10743.2	10743.2	10875.5	11654.2	12934.2	13494	13736.5	14004.2	13924.8	13924.8	14033.8	14065.5	14256.8	14294.8	14677.2	14942	14882.5	14697	14697	14697	14687.8	14615.2	14559.8	14593.2	14498.8	14498.8	14498.8	14483.8	14534.8	14589.8	14606.8	14790.5	15036	15036	15004	14795	14863.2	14895.8	15458.2	15806.5	17671.5	21305.5	23659.2	24405.2	24846.5	24846.5
8582	7968	7515.75	7515.75	7958.5	8937.5	9448.75	9448.75	9695.75	9474.25	9382.25	9532.75	10011.8	22306.2	47469.5	57583.8	57618.2	54543.2	53290.5	51099	52455.5	53503	52309.5	50054.8	50054.8	48228.2	47560.5	47560.5	47375.5	48725.5	48975	49760.2	48116	45931.8	40746	36037.2	32989.8	29721.2	27608.2	26036.8	24924	24158.5	23220	21810.5	20863	19659.8	18643.5	17613	17303.8	17022.2
3574	3915.75	3959.75	3981.25	4485	4539.75	4902	5397	5397	5245	4625.75	4625.75	3851.75	3950	4658.25	4625.25	4530.5	4395	3199.75	2174.75	1665	1399.5	1399.5	1834.75	2831.75	3134.5	3134.5	2672.5	2672.5	2743	3659.5	4349	4729.25	4814	4814	4859.25	4967	5226.5	5226.5	4862.25	4899	4464.25	3969.25	4292.25	4338.25	4112	4112	4388.25	4339.5	4519.5
16917	16423.8	17769.2	16699	14330.5	14460	13141	12527.2	12405.8	12067	12015.5	12215.8	12657.5	13526.8	13661	13866.8	13368.8	12772	12772	12576.5	12597	13171.5	13366.8	13033.8	13365	13092.2	12905.2	13032.2	13475.2	13700.2	13777	14263.5	14812.5	15534.2	16059.5	16355.8	16423	16809.5	17228.8	17552.5	17680.8	17641	17412	17508	17191.5	17065.5	17003.5	16622.2	15956	15742.2
6848	6838	6648.25	6538	6417	6301.5	6235.5	6224.75	6130.25	6112	6012	5987.25	5987.25	6103.75	6086.25	6149	6149	6078.5	5954	5949	5904.25	5858.25	5954.5	6045.25	5963.75	6008.75	6038	6038	5993.75	6049	6002.5	6082.25	6019.5	6033	6029.25	6132.5	6134.75	6095.25	6046.75	5932.75	5873.5	5842.5	5923	5923	5983.5	5939.75	6017.75	6097	6132.25	6164.75
6044	5771	5377	4912.75	4764	4712.5	4712.5	4969	5274.5	5398	5398	5375	5393	5338.25	5328.5	5384.25	5466.5	5384.25	5493.75	5612	5659.75	5551	5590	5609	5508.5	5500.5	5503	5595.25	5569	5624.5	5641.25	5641.25	5557.5	5397.25	5148	5110.75	5110.75	5110.75	5065.25	5113.25	5176.75	5174	5259.5	5282.25	5427	5434	5480.5	5546.75	5587.75	5587.25
167	151	151	150.25	156	163.5	163.5	158	159.75	157	145.75	145.5	146	137.5	129.75	136	134	128.75	133.75	138.75	142	142.5	142.75	145.75	146.25	140.25	141	140.75	128.25	125.25	118	110	113.5	121	113.5	118.25	133.25	130	121	126	133.75	123	124.5	128	128	128	124.75	133.25	127.75	132.75
5314	4907	4546.5	4316	4185.5	4060.75	3931.25	3828.75	3725	3487.75	3015.25	2684	2615	2603.75	2663.25	2740.5	2904.5	3085.75	3129.25	3141	3212.5	3212.5	3167.5	3167.5	3166.25	3113.5	3106	3074.25	3067.25	3068.5	3087.25	3105	3126.5	3126.5	3041.25	2887.5	2777.25	2716	2583.75	2514.75	2545.75	2588.75	2697	2867.75	2867.75	2723.25	2738.25	2738.75	2638.75	2628
2961	2885.75	2916.5	2901	2901	3082.5	3181	3161	3178.75	3202.75	3202.75	3246	3164	3257.25	3336.5	3363.75	3355	3459	3528.75	3551	3554	3554	3479.75	3436.25	3297.75	3042.75	3033.25	2885.25	3005.25	3167	3196.5	3037.25	3196.5	3128.5	3135.75	3235	3235	3160.25	3196.75	3142.5	3110.5	3116	3136	3117.5	3112.5	3067.5	2910.75	2910.75	2915.5	3119.75
8636	8315.5	8457.75	8408.5	8407.25	8459.25	8459.25	8466.25	8514.25	8458	8297.25	8457.25	8461.25	8299.25	8459	8437.25	8528.25	8208.75	8359.25	8107.75	7907	7815.25	7908	7789.75	7608.75	7629	7532.25	7468	7396.75	7334.5	7217.75	7222.25	7094.75	7030	6960	7004.5	6945.5	6757.75	6753.75	6702	6646.75	6646.75	6807.5	6943.25	7103.25	7142.25	7287.75	7301	7176.5	7121.75
11615	12432.2	12595.8	12789.2	12324.5	11996.2	11587.2	11680.2	11701	12260.2	12336	12336	12008.5	11945.8	11750.8	11943.2	12194.8	12307.2	12579.8	12969.2	12946.8	12958.8	12892	12398.2	12380	12335.2	11858.2	11562	11408.8	10855.8	10205.5	10131.8	10735	10735	11196.2	11550.5	11482	11468.8	11308.8	11087.8	11067.2	11105.8	11105.8	10890.5	10470.5	9827	9095.75	8688.5	8660.5	8660.5
11996	12530.5	13466.2	14380.2	14556	14588.2	14378.5	14307	14307	14061.5	14008.5	14117.2	14000.5	13888.5	13888.5	13749.8	13495.2	13468.5	13468.5	13468.5	13259.5	13792.2	13638.8	13638.8	13893.8	14300	14150	14634.5	14828.5	15399	15157.5	15521.8	15608.5	15608.5	15718.8	16033.2	16276.2	16276.2	15791.2	15729.2	15384.2	15384.2	15609.8	15609.8	15440.2	15544.5	15544.5	15744.2	16089.5	16347
3700	2925.25	2691.25	2691.25	2688.25	2593	2453.5	2373.25	2373.25	2434.75	2476.75	2551.75	2650.25	2795	3127.75	3560	3820	4046.75	4372.5	4630.5	4940.5	5545.5	6125.5	6489	6815.75	6952.75	6952.75	6877.25	6768.5	6670.25	6635.25	6653.25	6659	6823.75	7025.25	7137.75	7262	7274	7275.75	7255.5	7257	7163.75	7086	6927.75	6751.5	6504.25	6166.5	5852.5	5689.25	5617.75
2042	1525.75	1313.5	1292.25	1330.5	1268.25	1314.5	1420.5	1377	1260.5	1263	1200.25	1200.25	1200.25	1287.5	1281	1264	1210	1235.25	1235.25	1367.25	1503.25	1575	1575	1563	1545	1598.25	1433.25	1471.25	1385.25	1386.5	1256.75	1292.75	1278	1318	1318	1321.75	1326.25	1284	1388	1265.75	1322.25	1394.5	1474.25	1376	1474.25	1436.5	1300.5	1222.25	1199.25
5772	6745.75	7359.75	7359.75	6720.75	7073.5	7116.5	6644.25	6885	7368.75	6947.5	6947	7161.5	7161.5	7161.5	7135.75	6822.75	6641.5	6866.75	6641.5	5890.5	4484	4207.5	3870.5	4326	5457.5	5485	4838.5	6344.5	6344.5	4779	5226.5	6641	5753.5	5003	5363.75	5846.75	5394.75	5150.75	5604.5	5479	5479	5412.75	5412.75	4992.75	4608.75	4115	3907.25	3643.75	3634.5
40935	39607.8	39834	39192.2	37907.8	36700.8	37555.8	36636	35730.2	35974.8	35234.8	34073.2	34073.2	34730.8	33186	34639.8	34870.8	33472.2	32295.5	32295.5	31454.5	31294.8	31559.5	31530.2	31945.8	32243.2	32524.8	32437.5	32378.2	31998.2	31777.8	31777.8	32323.8	33220	33220	33650	33936	33934.5	34382.5	34562.5	34562.5	34440.2	34411	34130.2	33563.2	33930.2	33290.2	32793.5	33290.2	34004.2
2052	916.75	508	456.75	461	500.5	515.25	616.75	616.75	620.25	618.5	580.25	580.25	620.5	592.5	623.5	596.75	517.75	461	427.5	393.75	381.75	381.75	372.75	396	449	466.75	470.5	504	535.75	549	549	533.25	548.25	524.75	524.75	616.5	614	743.75	838.25	868.5	858	858	858	809	791.75	841	841.75	803.25	823.75
72880	66134	61491.5	57576.2	55040.5	53328	52531	52449.5	52449.5	53112	53761	53761	54873.5	54386	54397.8	54409	54409	53825.5	53760.5	53657.5	53575.5	53575.5	53019.5	52312.5	52435.2	51997.2	52585.5	53145.5	53145.5	52081.2	50935.5	49698.2	49604	48902.5	48902.5	49834	49289.5	47889.5	48479	50568.5	51634.2	51302.2	53092.8	53567.5	52300.2	51241.5	52278.2	52007.8	51106.2	50513.5
20117	18405.2	16982.2	16968	17830.5	17536.5	18218.2	18435.2	18651.8	18611.5	19294.2	19294.2	20653.8	21878	22674.2	23061.8	22991.2	22643	23085.8	23125	23398.8	23822	23822	23044	22425.5	22243.5	22243.5	23334	23957	24296.5	24296.5	24296.5	24455.8	24676.2	24909.2	25749.5	26791.2	26903.5	27554.5	27081.2	26370.5	25758.2	24929.8	24929.8	24752.8	25124	24583	24618.2	24592.2	24592.2
15249	13386.2	12233	11212	11212	10394.5	10382	10382	10529.2	11171.8	11342	11342	11569	11982.8	12225	12719.5	12719.5	13041.5	12775.5	13066.5	12830	13334.8	12849.2	12700.2	12462	12330.5	12213.5	12292.2	12507	12292.2	12096.8	11932.8	11952.8	11688.5	11966	11966	11813.8	11691.2	11488	11269.5	11146	11264.2	11152.2	11307.2	11262	11529.5	11529.5	11778.2	11854.2	12106.8
24322	21515.8	19357.2	18475.2	18299.8	18299.8	18857.5	20248	21414.8	22008.5	22065	22418.5	22985	23452	23487.8	23636.8	23734.2	23356.2	23495.5	24179.2	24230.5	24230.5	24942.2	25118.5	25625.8	26388	26561.5	26348.2	26348.2	25794.2	25156.2	25125	25125	26113	26753	26753	26752	26001.8	24508.2	22854.2	21634.2	20572.8	20141	20009	20156.5	20305.5	20567.2	20628.2	20628.2	20652.8
42673	38384.5	34975.2	33286	32314	31177	30442.5	30382	30095	30095	29952	30509	30974	32072.2	32280.8	32303.8	32631.5	32043.8	31459.8	30848.8	31008.2	30767.2	31368.5	31774.2	32141	31913.5	31913.5	32136.5	31660.2	30739.5	30647.5	31019	31019	31468.8	31662.8	31927.2	32291.5	31992	31828	32190.5	32006.8	31267	32006.8	32060.2	31387	31371.2	31945.8	31588	32028.5	32301.2
4441	3011.25	2497.25	2413.5	2303	2303	2294.75	2405.25	2407.5	2407.5	2309.25	2379.25	2380.75	2649	2921.5	3132.5	3166.75	3236.25	3292.75	3442.75	3657.25	3756	3756	3833.75	3860.25	3901.75	3949	4019.75	4111.75	3995.75	3942	3845.75	3793.75	3679.75	3556.5	3574.25	3722	3722	3848.5	3937.75	4048.25	4253	4410.75	4410.75	4380.5	4383.75	4320.75	4354.75	4531.25	4592.75
2479	843.75	252.25	192.75	187	174.25	189.5	206.25	206.25	179.25	176.75	163.75	163.75	179.75	195	210.5	210.5	202.25	201	201.5	201.5	198.5	195.5	198.5	198.25	192.5	192	184.5	179.75	175.75	175.75	172	173.5	186.25	206.25	227.25	227.5	227.5	224	224	223.5	237.25	237.25	237	227.75	233.5	239.75	303.25	312.25	312.25
5789	13809.8	19684.5	20647	18560.2	17552.2	17552.2	17552.2	18351.8	20647.5	23457.8	26306.2	27842.2	28323.2	28288.8	28424	28561.2	28712.2	28856.8	29193.5	29544.2	29863.8	29996.2	30239.5	30684.5	31115	31152.5	31152.5	30735.5	29941.2	29139.8	28574.5	28263.5	28340.5	28340.5	28630	28756	28756	28497.2	27839	27768.2	27768.2	27765.8	28233.8	28256.5	28253.2	28045	28297.5	28392	28878
45564	39245.8	36068.2	35013.5	34476	34200.8	34200.8	34603.8	35564.8	36211	36211	36362	36299	36000.2	36000.2	36272.8	36392.8	36442.8	36460.8	36590	36257.5	35777.8	35332.8	35175	34880	35175	35444	35676.5	35868.8	36042.8	35868.8	34991	34482.5	33625.8	32495.5	32985.5	33536.5	32890	31875.8	31834.5	31600.2	31475.8	31646.2	32468.8	32471.5	32225.2	33064	32796.5	32796.5	33488.2
101931	93477	86658	80244	75365.2	72874.8	71721.5	71089	71089	73469.5	77590	79061.8	80942	81845.5	84441.2	87070	88120.8	88120.8	87427.2	88362.8	88119.2	88018.2	88701.2	89641.2	90878	93273	95651	97824.2	97824.2	97257.2	94078.2	92163.5	92163.5	91411.8	85534.2	70824	58792.2	56035.5	56035.5	58394.2	61024.2	63975	66663.2	68683	70060.5	71154.8	72272.2	73865.5	75539.5	76920.2
2973	1531.25	615	333.75	333.75	327.25	343	375.75	379.75	374.25	379.75	366.5	357	362	335.75	315.75	300.25	300.25	299.75	302.75	302.75	292.5	316	316	323.75	320.75	320.75	315.25	303.25	279.25	264.25	264.25	269.75	272.25	284.25	284.25	272.75	266	260.25	260.25	262.5	262.5	272.25	282.25	271	272	272	265.5	265.5	268.5
4709	3272.75	2541.75	2234.5	1921.25	1798.5	1798.5	1698.75	1698.75	1706.75	1591.25	1576.5	1649	1678.25	1636.5	1631.25	1692.75	1692.75	1846	2085	2085	2093.5	2102	2193	1959.25	2167.75	2196	2129.5	2138.5	2138.5	2107.75	2092.75	2024.75	2001	2059.5	2013.75	2070.5	2070.5	2043.5	1984.75	1963.25	1945	1963.25	1967.5	2035	2164.5	2274.5	2275	2290.5	2358.25
74931	71380.2	68152.8	64632	60275	55873.8	54050.8	52313	52313	54889.8	57996.2	57724.8	57724.8	54128.2	48672	48638.2	46881.5	46025	49320.8	50363.2	51597.2	56732.5	56732.5	58295	60231.8	61285	60083.2	62590	63961.5	63961.5	60585.8	57871.2	53649.8	53546.8	55291.2	54754.8	54754.8	52523.5	50067.5	50067.5	52328.2	61405.8	64657	64657	62850	59394.5	54920.8	48851	48388	48388
3975	2764	2243.5	2099	2100.75	2053.5	2053.5	2053.5	2051.5	2122	2186	2159.5	2159.25	2177	2112.75	2113.5	2109.75	2095.5	2005.75	2018.75	1906	1846	1764	1668	1604.25	1558	1558	1558	1559.5	1525	1569.5	1478.25	1413.75	1413.75	1455.75	1487.75	1484.25	1656.75	1644.5	1644.5	1644.5	1797	2017.75	1958.5	1966	1689	1495	1446.75	1461	1382.25
3778	1376	514.25	488	495.5	472	483.25	489	489	478	486.75	478.25	466.75	466.75	521.25	553.25	618	619	584	558.75	543.25	534	534	548.5	547.25	548.25	530.75	511.75	511.75	558	645	690.25	726.25	726.25	703.75	735.25	717.25	618	612.5	545.75	513	513	499.5	509.75	508.25	546.25	546.25	569.25	600	667.25
3138	911.25	176.5	164.5	153	142.75	144.5	138.75	137.25	132	140	129.5	132.75	139.5	142.75	140.5	141.75	140.5	139.25	139.25	135.5	135.5	142.25	142.25	150.25	159.75	157.5	152.75	152.25	147.75	147.75	142.5	146.25	146.25	142.25	136.25	131.75	131.75	129.25	134.75	143.75	152.5	154.5	154.5	156	157.5	154.75	142.75	146	142.75
9957	5284	3357.25	3357.25	3320.75	3372.5	3532	3676.25	3439.5	3657.25	3516.25	3489.75	3667.25	3952.5	3858.75	4030	4030	3908.5	3935	3854.75	3871	4143.75	4343	4422.5	4422.5	4328.25	4188	4005	3986.75	3986.75	4115.75	4225.25	4369	4562.5	4693.75	4784.5	4883.75	4926.75	4926.75	4857.25	4857.25	4974	5256.5	5473	5473	5297	4991.25	4907.25	4907.25	5058
23748	19026.8	17452.2	17138.2	16905.5	16823.8	16949	16896.2	16950.5	17133.8	17133.8	16788.2	16788.2	17185.5	17272.5	17992.2	18387.2	18042	17554.2	17261.2	16931.2	16931.2	16785.8	16785.8	16731.5	16555.8	16546.8	16504.5	16567.5	16699.2	16808.8	16789.5	16991	16960	16867.8	16902.8	16902.8	16782	16603.2	16262.8	16262.8	16276	16162	16548.8	16548.8	16570.8	16359	16579.5	16572.2	16758
3285	1022.25	216.5	209.25	263.75	316	359.25	637	1205.25	1190.5	1147.75	585.75	197.75	197.75	205	211.75	211.5	220.75	227.25	236.5	235	248	263	268.5	255	270	250.5	215.5	189	201	196	186.25	181.25	185.5	178.25	177.75	174.25	164.25	157.25	160	160	166	167.5	167.5	180	183	181.25	190.75	190.75	193.25
4102	1659	732.25	670.5	670.5	751.25	999.5	1181.25	1424.25	1769	1937.25	1987.5	2094.75	2103.25	2056.25	2168	2180.25	2180.25	2333.75	2465	2481.5	2490.75	2490.75	2492.5	2480.25	2444.75	2492.25	2511.75	2404.5	2350.75	2350.75	2350.75	2263.5	2152.25	2135	2260.25	2273.25	2385.75	2385.75	2371.75	2371.75	2299.5	2269	2312.5	2384.5	2362.5	2362.5	2365.25	2309.25	2309.25
140	125.5	109.75	98	87.75	86.75	96	378	869.5	1082.5	1182.75	1092	1008.75	953.25	985.5	979.25	982.5	1073.25	2797.75	7134.5	9389.25	9389.25	8771	6079	4908.75	4698.5	4698.5	4992	5176.5	5176.5	5164.25	5306.25	5306.25	5777.75	6620	7228.5	7834	8442.75	8774.75	8774.75	8751	8787.5	8628.25	8655	8865.75	9177.75	8956.25	9569.5	9966.75	10649.8
92	63	45	39.75	39.75	39.75	37	36.5	37.5	40.25	57.5	58	58	50.25	39	36.25	33.25	29.5	29.5	26.5	27.25	393.75	861.75	263.75	272.25	278.25	49.75	43.5	47.25	43.5	38.25	34.75	39.25	37.25	37.25	35.75	37.75	37.75	39.25	39.25	39	37	34.25	34.25	35.5	36.25	37.75	37.75	36.25	39.75
68	54.5	57.75	49	42.25	42.25	49.5	43.25	44.5	42.5	42.25	34.75	34.75	34.25	36	33.75	33.5	35.25	35.25	37	36.75	41.25	43.75	40.75	35.25	42.75	42.75	35.25	41.75	48.5	48.75	45	52.75	89.25	788.25	1322.25	1675.75	1755	1366.25	1259	1043.25	1069.75	1156	1696.5	2417	2605.25	2662.25	2605.25	2573	2484.5
570	483.5	408	393.5	393.5	385.5	387	367.5	333.25	333.25	439.5	747.5	914.5	914.5	1081.5	1046	1046	1147.75	1163.25	1156.5	1160	1133.75	1133.75	1108.25	1065.25	1068.75	1119	1111.75	1130	1143	1131.25	1131.25	1125	1125	1086	1039.5	1039.5	1044.75	1376.5	2000.5	2559.75	2695	3007.5	3007.5	2367.75	1518.25	1128.5	1055.75	1024.25	1024.25
706	597.5	513.75	467	427.75	427.5	389.75	388.75	336.5	323	323	311.5	306	318.25	293.75	274.5	265.75	253.5	249	252.75	246.75	239.5	219	189	175.75	175.75	179.75	195.75	229.5	232.75	232.75	207.25	216	208	201.5	217	221.75	209	209.5	237.25	230.25	228	270.25	230.25	212.25	218.75	244.25	224.5	234	250.25
260	234.75	221.75	221.75	224.75	207.75	207.75	188.25	167	163	163	165.5	163	163	154.5	151.75	149	149	139.25	125.25	116.25	113.5	113.5	108	95.75	93.5	102.5	91.5	103.75	120.5	134	142.5	150.75	149.75	135.5	142	140.5	139	148.75	156.75	153	151	162.5	151.5	150.5	157.5	165.5	168.5	168.5	172
206	190	182.5	182.5	184.75	180.75	175.25	157.5	143.75	137.5	137.5	137.5	130.5	134	146	125.5	120.5	127	120.25	120.25	126.5	126.5	133.75	125	113	115.75	126.75	113.75	121.5	137.75	121.5	123	132.75	135	125.75	130.25	130.25	131.25	136	138.5	142.25	139.5	138	138	137.75	137.75	134.75	140.5	135.5	137.5
4601	4582.5	4493.25	3239	1063.25	32.75	26.75	27.5	24	18.75	18.75	18.5	19.25	19.75	23.75	23.75	23.75	23.75	24.25	21.25	18.5	17.75	17	17	19.25	27	0.001	0.001	0.001	0.001	0.001	0.001	0.001	0.001	0.001	0.001	0.001	0.001	0.001	0.001	0.001	0.001	0.001	0.001	0.001	0.001	0.001	0.001	0.001	0.001
174	132.5	105.75	87.75	87.25	103.25	131.75	168	209.5	219.5	205.5	205.5	205.5	196	196.75	190.25	179	162.5	179	165.5	152	139	142	140.75	137.25	136.5	135.75	136.5	139	148.75	148.25	159.75	162.25	149.5	150	143.75	120.75	103	106.5	100	100	95.5	104.75	116.5	123.75	136	156.5	168	169	176
150	108	86.25	75	64	55	55	61.5	65.25	67	67.75	66	63	57.5	59.75	245	297.25	292.5	298.75	86.75	47.75	38.75	36	34.5	34	35.75	38	38.5	38.5	38.25	38.25	39.25	42.25	42.5	49.5	42.75	41	38	42.75	42.75	44.75	44.75	44.75	41.75	36.5	36	36	38	37	36.5
305	339	343	343	327.25	328	340	352	356.5	386.25	353	333	342.75	354	338.25	355.5	355.5	359.25	346.25	373.75	380.25	386	342.75	357	335.25	335.25	349.5	356.5	347	356.5	358	345	340	340	334	334	342.25	374	374	293.25	293.25	271.75	239	295	310	310	326.25	308.25	308.25	313.25
86	65.25	51	45.5	48	49.5	49.5	49	46.75	38.75	36	35	35	33.25	34.25	30.75	31.25	29.75	29.75	29.75	30.25	27.5	27	27.75	27.25	28.25	30	31	32	33	33	33	31.25	26.75	26	26	29.25	29.25	29.25	28.25	24.75	22.75	21	23.75	24	27.25	26.75	27	21	19
133	133	144.25	163.5	159.25	148	148.5	142.5	133.25	133.25	132	129.75	129.5	134.75	144.75	154.5	164.75	164.75	172	167.75	170.5	159.5	149.75	138	153.25	153	160.75	160.75	175.5	179.25	189.25	186.25	186.25	169.25	164	152.25	164.5	171.75	170.25	167.75	167.75	167.75	163	164.5	158.75	150.5	148.5	153	149	155.5
185	105.75	111	92.75	88.5	97.25	97.25	96.25	85	83	75.5	67.25	66.75	60	60	61.5	59.5	64.5	72	67.75	67.75	67	62.5	65	65	59.25	104	103	67	72.5	70.75	65.25	65.25	65.25	129.5	128.5	127	146.25	74	61	74	90.75	76.25	77.75	77.75	77.75	66.5	57	46.75	47.25
47	42.25	40	36.75	33	33	27.75	23.5	27.25	25.75	24	25.25	25.25	23	23	19.75	19.25	18.25	21.75	18.5	20.5	18.5	21	175	306.75	470.25	470.25	470.25	269.5	144.5	30	87.5	21.75	22	20	22.75	19.75	21.75	21.75	21.75	25.75	30	41	41	41	39	36.5	55.75	23	29.25
86	70.5	62.5	61.25	61.25	61.25	61.5	60.75	72.75	112	110.25	68	110.25	147.75	184	295	295	291.25	248.25	172.25	172.25	809.5	2413.5	3691.75	4003	4003	3924.5	3788	2954.5	1466	709.75	700.25	705	719	714.5	749	750.25	795	751.25	751.25	751.25	745.75	768.75	854.5	935.5	937.5	937.5	923	902	836.5
24	24	26.5	29.75	27	22.25	27.75	25.25	24.75	24.75	30.75	25.25	27	28	28	26.25	31	32.5	32.5	32.5	37.5	35	31.75	26.75	28	28	29.25	33	37.5	37.5	37.5	33.75	32.75	31	32.75	31	33	32.5	34	33.25	36.25	36.75	40.5	40.5	39.5	35	32	32	33.25	32.75
132	85.75	65.5	57	50.25	48.75	47	45.5	43.25	42	42	41.5	41.25	37	40.25	36.25	29.5	30	116	296.25	330	379	334.25	281.25	280.5	330.5	280.5	289.5	321.75	330.5	870.75	2113.5	2975.5	3231.5	3377.25	3377.25	3177	2892.25	2690.25	2657	2657	2887.75	2887.75	3466.5	3977.25	4223.5	4481.25	4481.25	4200	4202.5
80	70423.8	95082	95082	92760.8	86323	78123.5	72465	68037.8	64238.8	60687.5	59033.2	58588.5	57656	55426.2	51443.2	46522	41587	37352	34000.8	31381.8	26261.2	18255.2	13506	12899	12899	13060	13199.5	13199.5	13178.2	13052.5	13042.5	12976	12984.8	13015.2	12972.5	12864.5	12896.8	12858.8	12747.8	12839.5	12964.5	13002.5	13054.5	13102.2	13067.8	13148.5	13169	13188.2	13224.8
20	19.75	19.75	22	22	21.75	19.5	20.25	36.75	71.5	94.75	113	385.25	909.25	909.25	1219.75	943	344.25	71	71	32.25	32.25	34.5	21.75	24.75	21.75	26	27	65.75	139.5	184.5	185	181	193.75	183.75	183.75	181.75	146.5	148.25	168.5	144.75	184.75	184.75	189	160.25	130.25	129	141	141	162.75
118	105	90.25	77.5	67.5	67.5	57.5	55	56.75	68.25	57.75	59.75	60	55	54.75	54.5	50	46	48.75	44.75	44.75	47.5	48	47	47	46	45.75	44	41	37	33.25	33.25	34.75	38.75	40	40	38.25	35	35	32.25	33.5	40	50	44	44	43.75	42.75	41.25	38.75	41.25
44	51	54.75	58.75	52.75	53.5	49.75	46.25	42.25	44.75	37.75	34.5	35.25	42	35.25	33.75	27.75	23.5	23.5	21.5	21.5	24.5	27	27	27.75	27.75	23.25	19.5	16.5	16.5	18.25	19.75	21.5	22.5	22.5	21	20.5	19.75	19.75	20.25	19.75	19.75	20	19	19.25	18.25	69.75	71.75	74	25.75
63	72.5	87	99.5	100	105.25	98.75	93.5	85.75	81.5	77	70.75	71.25	71.25	66.25	68.25	71.75	70	70	72.75	72	71.75	72.25	67.75	68.25	73.5	75	79.25	79.25	76	77	75.5	70.25	70.25	69.75	62.75	57.75	60.25	63.25	63.25	63.25	64.25	62	56.75	56.75	60.25	64.5	62.5	62.5	60
253	233.75	202.75	175.25	160.5	150.5	158.25	147	140	151.5	175.25	155.25	151	154.5	154.5	141.25	163.5	180.75	196.75	175	172	149.5	144.75	134.75	133.75	135.25	131.5	121.5	124.5	110	110.5	110.5	126.25	127.5	131.75	116.75	124.5	122.75	122.25	124	126.5	136.5	342.75	779.75	1073.25	1163	1214.25	1214.25	1239.25	1228.25
758	752.75	752.75	784.75	849.75	851.25	851.25	865.25	809	780	797.5	880.5	960	1011.75	1019.5	1008	1010	1010	1010	1021.25	1026.25	1018.5	998.5	998.5	987	987	990.5	977.25	977.25	944.25	907.5	879	879	887	889.25	928.5	974.75	984.75	1017	1017	1003.25	961.25	928.75	902.75	845.5	753	662.75	580	572.25	560.75
67	57.5	49.5	40.75	37	35	35	34	32.75	33.75	31.75	28.25	28.25	28	28	28	30	30	30.75	29.25	28	27.5	26	22.5	20	21.75	21	21.5	21	24	20.5	20.5	20	24	20.5	23.5	19.75	23.25	22.5	27	29.25	29.25	28.25	29	28	26.25	28.25	28.25	26.75	26.25
118	105	90.25	77.5	67.5	67.5	57.5	55	56.75	68.25	57.75	59.75	60	55	54.75	54.5	50	46	48.75	44.75	44.75	47.5	48	47	47	46	45.75	44	41	37	33.25	33.25	34.75	38.75	40	40	38.25	35	35	32.25	33.5	40	50	44	44	43.75	42.75	41.25	38.75	41.25
64	60.5	60.5	3889.75	11968.5	16853	17057.5	17741.8	17528.8	15948	13105.2	10107.5	8314.75	7600.5	7179.75	7138.75	7098	6714.25	6221.25	5915.5	5915.5	5851	5805	5675.25	5448.25	5185.5	4764.5	4764.5	5634.25	6529.75	8065	8435.5	8435.5	9078	10481	11324.8	11324.8	11840.2	11840.2	12852.2	14125	14459.2	14459.2	14026	12760.8	10881.2	9254.5	8380.5	8380.5	8327.25
88	89.5	89.5	88	81.5	81.5	71.75	61.75	59.75	54.75	54.75	54.75	51	47.25	50.5	46.25	47	52.25	56	233.5	671.5	883.25	953.25	953.25	752.75	728.25	755.25	784.5	817	848.5	730.5	678.5	628	707.25	809.25	895	888.75	1006.75	1142.75	1009.25	1096.25	1096.25	1096.25	980.5	881.25	655.75	560	539.25	539.25	640.25
222	199.75	184.75	184.25	181.5	174.5	176.25	191.5	186.5	172	163.75	152.25	152.25	135.5	142.75	129.5	115.5	103.25	117.25	99.75	117.25	140.25	160.75	174.5	185	184.5	186	172.75	171.25	155.25	139.5	134.75	134.75	115.25	108.75	107	98.25	106.75	106.25	107.5	124.5	147.5	161	209.25	245.75	254.5	246.75	258	281.75	306.5
60	56.5	49.5	46.75	43.75	36.5	32.5	28.25	28.25	29.75	29.75	29.75	29.25	26.25	26.25	29.25	28.75	32	33.5	31.25	32	31.5	31.5	26.75	27.5	27.5	31	25.25	29.75	28	24	21.75	21.75	21.75	23	23.75	27	28.25	28	28	27.75	26.25	27.25	26.75	28.75	27.5	28	27.5	27.5	26.5
159	113.75	95	89.75	81.5	64.75	64.75	889	3134.5	6111	8922	9284.5	10502.8	10484.8	10080	9668.25	9668.25	9408.5	8942.25	8238.75	7305	6289.25	5671	5228	5065	4949.5	4616	4716.75	4488	4500.75	4500.75	4871.75	5182.25	5264.5	5797.25	6359.75	7338.75	7215.75	7766.5	7010	7866.75	7358.25	7142.5	6452.75	6452.75	6451.75	6230.25	5985	5506.5	5511
124	90	72	72	378	767	921.75	922.25	731.75	620.5	483.25	417	406	406.75	474.75	606.5	672.25	672.25	690	766.75	763.25	598.25	692.75	634.5	486.75	480.5	555	501.75	530.75	530.75	530.75	523.75	559	565.75	662.25	696.75	696.75	739.75	681.5	633.25	633.25	685.25	692.5	712.75	712.75	707.75	685	679.5	638	635.25
126	88.5	69	63.25	60.5	54.75	48.25	48.25	49.5	54.5	61	303.75	786	1021.25	1039.25	1071.75	1840.25	2981.25	3556.5	3556.5	3369	3324.25	3324.25	3368	3592	3901	3995.75	3995.75	3995.75	4051.5	4172.75	4170	4334	8478.75	23330	41360	47789.2	49705.8	49597.2	49538	45822.5	39172	30455	27316.5	27316.5	27473.2	27683.8	27953	28189.5	28324.8
68	46	35	31.5	31.5	32	35.25	40.75	43	42.25	45.25	52	87	137.25	179.75	197.75	286.25	370.25	410.5	445.5	441	453.25	442	453.25	428.75	380.5	380.5	393.75	399.25	453.5	453.5	393.75	364.25	303.5	303.5	287.5	301.75	384.25	450	465.75	465.75	437.5	437.5	442.5	470.25	510.5	510.5	547.5	570	528.75
106	91.75	80	69.25	59	55.5	52.5	52.5	55	57.5	58	58	56.75	55.25	50.5	46.75	47.25	46	46	44.5	47	52.25	54.25	49	54.25	51.75	45.75	41	46.25	45.5	49.75	52.25	52.25	51	53	55.5	48.75	51.75	47.75	43.5	43.5	44.5	38.25	43.75	43.75	43.75	45.25	45.25	42.25	37
52	40	35.75	35	31.5	32.75	36.25	32.75	30	27.75	27.5	26	25	22	21.5	17.75	17.75	22.5	23	24	24.75	21.75	21.5	21.25	21.25	20.75	21	20	23.25	22.25	21.5	25.75	28	27	27.75	27.75	28.5	25	19	14	18.75	14	12.5	14	15.25	12.5	15.25	15	16.25	13
53	47.25	40.75	35	31	27	27	27	27	25.25	25.25	26	23	22.75	20.25	18.25	16.5	19.25	20	27.25	30.75	32.25	32.25	32.25	30	27.75	24.75	29.5	25	23.75	23.75	27.25	23	21.25	19.25	21	17.75	18	17.75	17.75	16.5	16.75	16.75	15.5	15.75	18.25	19	19.75	23.5	29
8374	6798	5658.75	4773.75	3702.25	2533.5	1755.25	1438.25	1271.75	1140.75	1017.75	1017.75	1128.75	1195.5	1194.5	1298.5	1318.5	1510.5	1913.75	2305.5	2398.25	2397.75	2507.5	2506.75	2553.5	2553.5	2547.5	2156.25	1764	1606.75	1606.75	1697.5	1697.5	1772.5	2066.75	1800.75	2025.25	2252	2207.75	2207.75	2519.75	2507.25	2914.5	2788	2142	1595.25	1784.75	1256.5	766.5	793
60	159.75	184.5	184.5	180.25	153.25	132.5	134.5	131.5	131.5	131.5	142.5	140.25	154.25	151.25	151.25	132.75	125	125	129.25	161.25	161.25	163.25	166	191.25	203.75	204.25	204.75	163.75	163.75	153.75	162.75	156.25	169	169	184.5	222.25	265.25	299	329	356.25	376.25	385.5	391.75	391.75	359.25	260.5	145.25	93.5	93.5
90	65.75	55	51.5	48.25	44.5	41.25	38.25	34.75	35.75	34.75	32.75	29	28.5	26.75	24	24	27	29	28	28	29.25	29.25	28.75	33.25	33.25	30	26.25	25	25	25	25	23.75	21.25	21.25	21.75	19.25	18.75	21	17.75	17.75	18.75	16.5	16.5	18.5	18	19	19.25	20	19
13	22.75	24.75	27.25	26.75	27.75	30.25	35.75	36.5	36.5	31.75	33.25	33.25	33.75	33.75	34.75	35	32.25	31.5	31.5	30.5	30.5	29.75	31.5	31.25	36	33.25	32.25	30.25	30.25	30.25	28.5	31.5	27.25	27.5	28.75	30.75	29.25	29.5	34	32.25	32.25	33	36.5	33.5	34	34	32.25	30.25	27.5
32	33.75	29.5	25.75	31.5	35	25.25	20.75	23.25	23	19.75	22.5	22.5	21	20.25	15.25	15.25	17	20	17.25	18.75	16.75	18.75	18.5	20.75	22	22	22	24.75	24.5	23.5	24.5	24.5	23.75	23.75	23.75	27.25	26.5	28.5	21	21.5	16.25	17.75	17.75	17.75	14.75	14.25	12.25	11.75	12.25
217	174	149.5	137.75	130.75	120.75	107.75	101.25	99.25	95.75	91	84.75	79.5	75	72	71	71	71	71.75	72	71.5	72.75	71.25	71.25	68	72	68.5	65.75	63	62.75	62.75	61.5	61.75	68	77.25	69.75	69.75	78.75	68.75	60.25	63.5	66.5	63.25	61.75	65	65	63.75	57.5	65.5	62
120	97.25	88	87.5	81	70.5	62.5	59.25	55.5	55.25	52.75	51.25	50.75	53.5	50.75	50.5	46.5	52.25	47.25	50.75	50	52	50	48.75	46.75	46.25	42.75	38	35	31.25	31.25	31.25	29.5	30.5	30.5	37.25	36.75	37	36.5	39.25	40.5	43	44.5	44.5	44	42.25	41.25	38	41.25	38
80	72.5	66.25	59.25	57	54.75	47.25	41.5	40.5	36.75	33.5	30.5	26	26	28.5	30	35.25	39.5	42.75	45.5	49.25	53.25	54.75	57.5	62	57.75	57.5	63.25	63.75	59.5	63.5	63.5	55.5	55.5	50.5	49	50.25	49.5	48	48.75	47	48.5	47.5	47.5	44.25	49.25	49.25	52.25	51.75	51.75
125	119.5	119.5	101.75	82.5	74.75	70	70.25	61	73.75	69.25	115.75	103.25	103.25	61.5	62.25	55.75	56	63.25	61	63.5	65.25	55	48.75	51	51	53.75	53.75	58.75	59.25	53.5	50.75	53	51.75	51.75	51.75	48.25	48.25	46.75	42.75	46	48.75	47.75	48.75	50.5	50.5	50.5	52.25	51.25	48.25
1025	2310.5	2310.5	2566	2588.5	2595.5	2717	2916.75	2916.75	2925.25	6818	15564.8	21587.8	22953.2	23515.2	23840.8	23940.2	24068	24068	23966	20991.5	15571	12862	12528.2	12585.8	13203.2	14391.2	14314.8	14437	12134.8	9738.75	8046.5	7044	6072.5	6072.5	7015.5	6858	7076.5	7363.75	6922.5	6178.5	5925.5	5048.5	4256.5	4227	3596.75	3205.25	2977	2816.5	2634.25
50	46.75	46.5	39.75	36	36	35.75	37	37	35.25	31	26.75	22.25	26.75	27	29.5	41.25	51.75	51.75	51.75	64.25	86.25	92.25	92.25	95.75	92.5	76.75	85.25	89.5	79	60	62	45.75	45.75	40.25	49.5	73.25	76.5	102.25	105.75	102	100.5	119.25	119.25	119.25	116.75	118.75	104.25	103.5	110.5
44	33.5	28	24.75	20.5	22	21.5	23.5	28	30.25	28.25	30	33.25	35.75	35.75	36	35.25	39.75	47	41	43.75	49.75	50.75	43.75	44.25	43.25	37.25	34.75	35.25	36	42.5	42.5	43.5	43.5	45	48.5	49.75	58.5	62	71.25	62.25	71.25	70.25	62	61	68.75	68.75	73.5	73.5	68.5
70	61.5	45.75	37.25	35.75	35.75	34.75	33.75	33.75	32.75	28.5	26	26	23.5	25.5	58.75	125.75	172	174.25	188	204.25	196.5	158.5	134	134	119.5	127.5	126.5	148	126.5	105.75	100.25	111.5	111.5	140.25	163.25	163.25	168.5	163.25	153	139	144.75	125.5	125.75	132.75	159	182.5	202.5	219.5	254.5
112	102.25	100.25	86.25	82.75	88	82.25	75.75	75.75	61.75	52	51	48.25	46	41.25	40.5	36.75	37	33.25	39	35	34.75	35.25	42	36	36	36.25	36.25	31.75	34.25	38.5	41.75	42	42.75	47.75	45.5	48.75	47.25	50	50.25	56.25	55	55.25	53.75	47.25	46	47.5	47	44.5	44.5
37	36.75	33	25.25	21	19.5	21	19.5	19	17.5	15.5	12.5	12	12	15	15	15	13.5	12.75	12.75	13.5	13.75	15.25	14.25	14.25	16.25	16.25	15	13	12	12	14.75	16	16	17	15.75	15.25	13.5	15	15	14	14.5	14.5	12	12	12.75	11	11.25	14	12.25
24	21.75	22.25	23	23	251.5	692.5	892	937.5	901.5	920.75	962.25	988.5	951	983.5	951	896.75	860	844.75	844.75	849	899.5	973	1000.75	1000.75	966.75	912.5	911.5	883.25	909.75	904.5	878.25	827.75	822.5	822.5	820.5	842.75	852.5	838	876	906.75	933.5	888	888	888	871.25	841.5	852.75	877.25	877.25
144	125.5	95	82	76.75	78	77	73.25	73.25	67.75	58.75	58.25	61.75	61.75	62.25	73.5	74.75	69.5	69.75	66.75	50	34.5	41.75	47.5	85.25	102.5	108.5	102.5	90.5	75	60.75	60.75	55.25	42.5	30.75	42	30.25	22.5	34.75	47.75	55.25	62	64.75	64.75	68.25	82.25	102	102	101.75	83
65	55.75	52.5	46.5	46.5	45.75	41.75	36.75	36.25	34.5	36.25	37.25	35.5	38.5	43.5	37.5	28.25	33.75	30.5	24.75	30	32	28.75	27.5	27.75	27.5	26.25	27.5	28.75	28.5	29	28.25	27.5	23.75	27.25	24.75	25	23	23	22.75	22	20.75	19	17.25	17.25	19	22.5	25	25.25	24.75
40	35.5	27.75	18.75	17.25	16	19.25	19.75	20.25	20.25	22.75	23.75	39.25	40.25	40.25	41.75	97.75	156.75	389.5	567.5	635	635	693.5	655.25	717.25	682.25	682.25	642	687.25	686	724.75	801	1254.5	1241.75	1237.75	1233.75	857.75	769.5	812.5	812.5	756.25	756.25	775.25	761.25	788.75	822.5	822.5	831.25	831.25	833.25
30	50	51.75	54.25	48.5	43	40.25	43.75	39.5	38.5	37.75	34.25	34.25	34.25	34	36	38.75	34.25	40.5	36.25	36.75	34.5	37	32.25	34	28.75	25.75	25.75	26.5	24.5	25.75	26.75	25.75	24.75	26.25	25.5	23.25	21.25	20.25	20.25	20.25	20.75	22.25	22.25	22.5	20.75	20.25	20.75	23.5	20.5
67	51	46.25	44	36.5	35.75	39.5	43.5	41.75	41.75	40.5	40.5	38.75	33.75	38.5	40.25	38.5	37.75	37.75	35.75	33	28.5	28	24.25	22.25	22.5	26	24.5	24.75	27	27.5	26.25	29.5	29.75	26.25	25	26.25	24.5	25.25	27	25.5	23.75	22.75	23	21.5	24.75	27	29.25	28.5	28.5
14	51.75	59.25	59.25	48.5	46.25	44.75	42	42.75	34	22.5	19	23	23	30.25	32	36	39.25	37.75	30.5	37.25	31	24.5	22.25	20.5	20.5	19.75	24	29.5	29.5	27.75	30.75	34.25	33	34.75	34.75	36.5	39	45.5	52.5	57.5	57	54.5	54.25	51	48	50	50	52.5	54.75
28	32	32	31	27.5	25.75	23.5	25.75	28.25	64.5	134.5	164.25	164.25	137	117.25	103	103	145.75	193.25	208	208	203.75	203.75	212.75	236.5	254.5	268.75	256.25	255.5	253.25	228.25	228.25	213.5	217.25	252.25	285	17144.5	53364.8	78751.8	85595	85595	84601	74364.5	63602	0.001	0.001	0.001	0.001	0.001	0.001
77	65	57.75	52.25	52.25	55.75	53.75	55.25	56.5	49.5	44	44	44	42.5	42.5	43.5	42	38.5	42.25	39	36.75	38.5	37.25	36.75	37	38.5	35.75	35.75	38.25	41.25	39.5	39.5	42.75	42.75	40.5	39	40.5	38.25	38.25	38.25	35.25	35.5	29.5	31	35.5	39	37.75	38.25	38.25	38.25
88	88	102.75	99.25	103.75	105.75	85.75	85.75	98.75	93.25	99.25	99.25	82.5	76.5	81.5	80.75	90.25	96	99.75	96	94.25	89.25	89	89	95.5	105.25	113.25	118.75	119.5	121.5	121.25	123.5	130.5	139.75	133.25	139.75	137.25	133.5	127.5	128.25	120.25	121.5	119.75	119.75	121.5	124	124	121	113.5	106.25
41	33.5	33.5	28	23	27.25	28	26.25	23.25	24	19.25	19.25	19	23.5	24	26.5	24	21	20	17.75	17.75	18.25	19.75	18	18.25	18.25	20	19.5	26.25	27.25	24.25	18.75	18.75	18.25	18.25	18.25	18.5	19.75	17.75	15.5	15.75	14.5	13.5	14.5	12.75	10.75	12.75	14	14	15.75
31	23	20.25	18	18	18	16.5	15	13.25	13.25	15.75	18.25	18.75	19	16	15	15	16	15.25	16	16.5	15	12.75	14.75	13.75	12.5	13.25	13.25	14	12.25	14.25	12.75	14.25	13	13.75	12.5	11.25	11.25	10.5	9.5	9.5	11	11	14.25	14.5	17.75	16.75	16	15.5	15.5
238	189.75	159.75	143.25	123.25	96.75	91.75	86	87.25	98.75	98.75	99.5	107.5	109.75	111.5	111.5	112.25	115.25	110	106.5	112	104.75	95.5	94	82.5	73	73	73	77	96	110.25	121.25	137.25	137	135.5	114.25	101.25	95.75	97	97	110	107	107	102.5	86.75	86.75	84	81.75	82.5	93.75
104	93.5	79.25	73.75	69.75	71.75	6257	20412	29079.8	29971	29971	28593.2	28593.2	28229.2	27872.8	27596.2	27431.8	27431.8	27707.8	26658.2	28902.2	29294	28524.2	28173	28173	27780.2	27696	27807.2	27807.2	28184.5	28586	28997.2	29723.2	29723.2	30524.2	30502.2	29308.8	29281.2	29380.2	29076.5	29517.8	29517.8	29136.8	28870.2	28797.8	28394.5	28797.8	29169.5	29143	29289.5
104	102.75	100.5	88.25	72	67.5	67.5	66.75	68.25	68.25	59.5	58.25	61	51.25	58.75	59.75	54.25	50.75	54.25	50.75	49.75	50	71.75	48.75	45.25	48.25	40.75	40.75	42.25	42.5	43.75	52	43.75	41.75	51.5	44.5	40.75	40.75	45.5	40	45	43	44	38.25	38.25	38	36.5	36.5	37	33.5
131	94.25	68.25	56.25	54.5	57.75	56.5	57.25	57.25	58.25	58.25	54.75	57	57	56	49	48	48	55	52	59.25	59.25	52.5	47.25	51	51.25	49.25	60.25	69.5	73.5	73.25	73.25	71.75	61.5	62.25	64	65.5	65.25	65.25	57.25	57.25	53.25	54	55.25	57.25	52.25	55	55	55.75	53.75
44	44	34	35.25	30.25	26	15.75	18.75	16	14.75	18	19.25	19.25	17.75	17.75	17.75	16.75	15.75	14.75	14	14	13.25	14	14	16	13	12	11.25	11.75	11.25	10.75	11.25	10.75	8.75	11.5	11.25	10.5	11.25	13.25	12.75	12.75	14.25	14.75	13.25	14	15	15	17	17	16.5
227	162.25	133	117.5	107	102	96.75	91.75	86.75	88.75	237	557	701	753.5	701	744.5	643.25	509.75	352	281.5	278	238	277.5	246.25	246.25	246.25	282.25	294.75	306.25	324.5	310	300.25	312	308.25	305	298	308	282.25	282.25	282.25	271	250.25	236.25	238	238	251.25	266	280.75	283.5	283.5
73	66.25	55.25	47.5	44.75	42.5	38	34	38	38	33	31	28	28	31.75	31.75	28.5	34.25	35.25	35.25	39.75	39.75	36	33.25	29.25	28.25	30	31.25	28.5	31.25	32.5	33.5	31	32.75	29	24.75	23.25	23.25	22.75	21.25	18.75	17.75	17.75	17.75	17.25	16.75	15.25	15.25	14.25	14.5
13794	13772.2	13500.2	13540	13540	13581	13581	13763.5	13836.2	14277.8	14401	14381.2	14377.5	14101.2	13968	13037.2	13055.2	12619.8	12623	13344	13518.5	13497	13547.5	13368.8	13344.2	13279	13219.5	12832.5	12515	12115	12115	12179.2	13236.8	13458.2	13532	13450.2	13201.5	12993	12851.5	12753.5	12656.5	12656.5	12658.8	12616.2	12617.2	12573.2	12249.5	12158.8	12053.8	11896.8
48	31.5	25	21.25	18	14.75	14.5	13.25	14	14	13.75	13	14.25	13	11.75	11.25	11.25	11.25	11.5	9.75	10.5	10.75	10.75	10.25	11.5	12.75	12.75	11.25	12	12.25	11.5	11.5	12.25	12	11.5	12.5	13.75	13.25	15	15	12.75	11.75	12.5	12	12.5	13	13	13	11.75	10.25
995	556.5	321.25	72.5	54.75	54.5	50	51	48	49.5	49.5	49.5	46.75	43.5	39.25	36.75	38	39.75	44	43.5	43.5	43	37.5	35	32.75	35.5	35.5	36.75	34	35.25	28.5	26.5	22.25	27	27.25	31	30.25	30.25	28.25	26.25	26.25	26.5	26.5	25.75	26.5	26.5	27	28.5	30.75	35.25
632	219.75	84.5	83.25	77	73	74	67.75	67.75	72.75	71.75	68.5	70.75	65	61.25	54	51.5	49.75	45.75	49.75	49.75	52.25	46.75	49.75	46.5	53.75	53.75	64.25	66.75	66.75	62.25	56	56	51.75	47.75	53.75	50.25	49.25	48	52.5	44.25	44.25	41.5	40.25	40.25	42.5	46.75	45	45	42.5
45	33.25	24.25	19.25	17.25	15	14	12.5	14.5	13.25	13	12.75	12.75	12.25	11.5	10.25	10	10	11	12.75	13.75	13.75	13.75	12	10.25	9.5	9.25	7.5	8	8	7	8.25	8.25	7.5	6.75	6	6	7.75	9	8.75	9.25	8	7	7	7.75	8	9	11	11	10.75
88	65	49.75	44	42	38.5	38.25	33.75	30	30	32.25	31.5	33	33.5	34.5	31.5	28.5	28.5	31	31	32	32.5	31.5	30.5	28.5	28.75	28.75	25.5	25.75	25.5	26.25	22.75	21.5	22.25	27.25	26	29.75	33	33	29.75	28.75	27.75	26.25	23.25	25	25.5	22.5	26.5	28	26.75
11	14.75	16.75	16.75	13	10.25	10.5	10.5	9.5	12.5	13.75	13	12.25	13	12.25	12	12.75	12.5	11	11.5	12.25	11.5	11.75	11.75	10.75	10.75	11.25	12.25	13.25	13.25	11.5	11.5	10	9.5	13	279.75	740.75	1001	1001	957.75	947.5	963.75	1001.75	1001.75	1109.5	1130.25	1033.25	878.25	892	892
46	47.25	42	35.5	37.25	37.75	36	41.25	41.25	39.75	31.75	28	25	25.75	27	30	32	32	30	26	25.75	25.25	26.5	25.25	25.25	24.25	22.5	21	18.25	14.75	14.75	16	16	20.25	24.25	21.75	20.75	22	23.5	21.5	22.75	25.75	23.25	23.5	23.5	23.5	23.5	27	30.5	30.5
76	69.75	62	55	52.5	50.75	49	49	52.25	48.25	47.25	52.25	47.75	43.5	47.75	47	47.25	47.75	49.5	46.5	49.5	50.25	50.75	51	51	51	48	44.75	41.75	41.75	39.25	39.25	41.25	41.25	44.75	47.5	48	49	49.75	58.5	59.75	59.75	53.5	55.25	53.5	51.25	49.25	47.75	47.75	48.5
38	31.5	28.5	25.75	22	22	19.25	15.25	15.25	15.25	16	16	18	16	17.5	17.5	18.25	14.5	14.25	10.5	9.75	9.75	10.25	11.25	12	12	13	12.25	12	11.25	12.25	11	10.25	10.75	10.25	7.75	8	10	7.5	7.5	9.5	10	9.25	10	10	9.75	9.75	10.25	11.5	11.75
1803	1865.5	1865.5	1963.25	2058.75	2164.25	2286.25	2332.5	2332.5	2358.75	2339.25	2338.25	2312.5	2301	2281.75	2307.5	2317	2345.75	2345.75	2335.75	2259.75	2187.75	2190.5	2256.75	2200.5	2201.75	2201.75	2238	2232.75	2291.75	2396.5	2403.75	2348	2346	2399.75	2340	2390.75	2459.75	2493	2503.75	2536.75	2536.75	2531.75	2502.25	2493.75	2476	2473	2492.25	2532	2509.25
85	73.5	73.25	66	59.5	55	51.75	48.75	45.25	45.5	42.75	43	38.5	43	41	44.75	40.5	42.75	42	41	37.25	39.5	39.5	39.5	41	42.5	46.25	52.25	51.25	55.25	62.5	62.5	79.5	95.5	103.75	125.25	167.75	197.25	209.25	237.25	270.25	279.25	279.25	262.5	248.25	248.25	227.75	257.25	258.75	260
67	49.75	48.75	38	38	39.25	35	40.25	41.25	36.75	34.75	34.75	34	32.75	32.75	33.5	33.5	31.75	34.5	31	32.75	32.25	31.25	25.75	24.75	24.75	25.25	26	26	27.25	27.25	25.5	22.75	25.75	25.75	25.25	24.25	28.25	30.75	26.25	25.25	30.25	30.25	25.75	30	32.5	31	28.5	28.5	26.25
138	125.5	113.5	100.75	87.5	76.5	67.75	67.75	67.75	64	63	60.5	60.5	67	73	85.75	112.5	134	142	157.25	155.25	158.25	161.5	163.5	169.25	169.25	158.75	133	106.75	100.75	100.75	91.5	108.75	97.5	118	108.5	141.25	147.75	160.75	164.25	165.25	149.5	158.25	170.75	148.5	162.5	177	173.5	154.25	141
431	157.75	67.75	64.5	67.75	63.5	58	51.5	51.5	51	52	49.5	49.5	51.5	47.75	44.75	42.25	44.25	42.25	36.75	35.25	36.25	33.25	33.5	37.5	39.5	42.75	42.75	43.25	47.5	46.25	48.25	49.25	43	40.25	39.5	37.25	35	33	33	34	31.5	34.5	34.5	34	34.5	37.25	36	43.5	43.25
58	43.75	43.75	37	31.5	27.5	43.75	22	20.25	21	20.75	20.75	21.25	21.25	23.75	60.75	60	54.5	54.5	19.5	17	17.5	17.25	19.25	17.75	19.75	19.75	22	21.5	25.25	24	24	18.25	20.75	16.25	18.75	16.5	16.5	16	15.5	15	15.5	16.5	15	15	13	13	12	13.5	15.5
28	29	23.75	24.5	25.75	21.5	20.25	21.75	21.75	45.75	45.75	45.75	57.75	39.25	39.25	39.75	39.75	27.5	24.5	22	19	18	23	21.75	22.5	25.75	25.75	27.5	26.75	32.5	34.75	36.75	37.25	43	44.25	45	49	51.5	54.5	54.75	55.5	56.75	55.5	56	55	54.5	56.75	61.75	56	64
49	39.25	34.5	34.5	30.75	27.25	19.5	22.5	22.25	22.75	18.25	19.25	19.25	17.25	19.25	21	24.25	24.25	24.25	21.5	19.25	19.25	32.75	59	70.5	85.5	114.5	107.25	116.75	121.25	125	119.25	117.5	117.5	113.75	113	112.25	112.25	374	390	395.25	397.5	144.75	133.25	133.25	124.25	110.75	110.75	103.25	90
207	257.75	284.25	287.25	287.25	287.5	304.75	288.5	294.25	294.25	288.75	288.75	282.25	290.75	295.25	308	296.75	301	301	307	316	317.75	332	341	371.25	362.25	378.75	345.75	328.75	305.5	310.5	310.5	332.25	348	374.5	386.25	384.75	407	407	384.5	373.75	351.25	346	346	351	367.5	369	363.25	363.25	363.25
187	180.5	159.5	145.5	152.75	139.75	139.75	134.75	128.25	127	127	128	135.25	146.5	146.5	157.75	142.5	150.75	163.25	180.5	186	186	185	183.5	191.5	192.25	198.25	203	203	203.25	210.5	217.75	212.5	212.5	222.25	208.25	209.25	205.25	217.5	217.5	217.5	194	188.5	183.75	183.75	209.75	209.75	238.5	261.5	249.75
81	67.5	59	55.25	54	51.25	51.25	51.25	52.75	50.25	48.25	47.25	52.25	52.25	50	52.25	48.5	41.5	38.25	38.5	35.75	34.75	34.75	32	32	34.5	35.75	35.75	36.25	35	35.25	39	40	43.75	44	41.75	38.25	41.75	38.25	37.25	34	32.75	32.75	33.5	36	37.25	38.25	39.75	35.5	31.75
58	43.5	43.5	3767	15675.5	26008.5	28755	28958.8	26901.5	26062.2	25535.2	25160.2	24835.8	24523	24523	24250.8	23972.8	23595	22997	22752.2	22752.2	23090.2	22831.8	22849.2	23634.2	23273.2	23479.8	23920.8	23988.5	23988.5	24150.8	24838.2	25293.5	25645	25645	25538.5	25538.5	25229.2	24342.2	24679.8	23935.5	23888.8	23966.2	23966.2	23966.2	24289.5	24311.8	24148.8	24700.2	25120.8
93	56.5	42.25	39.5	36.25	36	36	34.75	38.25	42	43.5	44	45.5	44	41	33.75	29.75	29.75	30	30	30.75	33.5	37.75	37.75	41.25	43.5	44.25	43	44.25	43.5	39.5	36	32.5	32.5	37.25	41.5	42.75	42.75	40.75	38.5	34.5	32	32	32	32.75	36.25	36.75	39	37.5	38.5
346	190.75	118.25	118.25	90	91.25	98	96.75	79.75	97	78.25	70.5	90.25	126	123.5	158.5	198.5	195.75	186	190.25	172	142.5	153.25	153.25	127.75	132.75	150.25	140.75	140.75	156	177	175.5	204.75	209.75	187.5	164	181	170.5	171	187.5	200	206.75	206.75	206.25	201	210.5	191.5	206.5	231	242
260	143.75	95.75	78.5	62.5	61.75	72.5	70.75	73	73	65.75	58.75	58.75	57	90	267	543	694	733	784	786	930.75	933.5	1052.5	1012.25	1115	1115	1115	1105.25	1174.75	1197.75	1098.75	1216	1299.25	1233	1169.5	1267	1286.25	1177	1181	1282	1311.5	1307.75	1415	1506.25	1487.25	1552.5	1563.25	1602.5	1563.25
535	266	145.75	112.75	96.75	87	87	88.25	124	231.5	816.25	1703	2197.5	2832.5	4070.5	4864.5	5067	5248.25	5248.25	5131.75	5091.25	5051.5	4332.25	4337.5	5345.5	7537.25	13306	15943.2	20317	20529	20172.5	20172.5	21906.5	23716.2	23716.2	25873.8	25873.8	27763	25192.2	28171	28831.2	26982.5	22814	26982.5	27695	28892	32459	32459	30269.8	24631.8
751	325	161	121.75	95	89.75	88.25	78.75	78	81.75	81.75	86.5	87.25	85.5	85.5	85.5	125.25	228.5	346	483.25	636.75	712.5	766	835.5	889	870	920.5	986	1069.25	1306.5	1690.5	1953	2053.5	2010.5	2014.5	1931.5	1817.5	1817.5	1757.75	1813.5	1913.25	1923.75	1794.75	1746	1715.75	1576	1466.5	1518.5	1494.5	1489.25
340	162.25	84.75	53.5	34.25	34.25	42.75	46.5	55	60.25	61.5	90.75	160.75	160.75	176.5	176.5	143.5	99	99	459.75	457.75	455.5	1284.75	554.75	89	101.5	101.5	91.25	81	67	62.75	62.75	64.5	65.25	76	85.25	79.5	59.5	108.5	183.5	188.5	251.75	253.5	236	212	194	173.75	170	173.75	1511.5
504	188	86.5	70	56.5	46.5	41.75	41.75	49	62.25	66.5	76	74.5	68.75	52.25	51.75	49	53	92.5	184	212	212	174.75	176.5	200.75	170.75	177.5	177.5	105	88.5	75	75	177.5	187.5	217.75	260	161.75	143.25	143.25	133.5	110	95.75	89.75	85.25	85.25	120	199.75	277	277	274.75
924	3105	3676	3676	3188.75	2755.25	2356.5	2021	1880	1862.25	1827.75	1786.25	1786.25	1765.25	1704.75	1698.25	1750	1750	1787	1832	1833.5	1887.5	1890.5	1936.25	1951.5	1989.5	1989.5	1966.25	1875.75	1816.75	1805.5	1813.75	1819.25	1878	1968.75	1968.75	1973.5	2039	1966.5	1933.75	1933.75	2059.75	2037.5	2240.75	2159.5	2181.25	1838.5	1677	1601.75	1661.5
1609	1609	766	444.5	394.75	343	287.5	271	271	276.25	270.5	291.25	284.25	278.5	269.25	270	270	270	267.75	256.5	245.5	245.5	249.5	243.75	233.75	245	233.5	219	211.25	217.25	211.25	202.5	192.75	193.75	179.5	179.5	177.25	183	177.5	209.75	231.75	249	220.75	228.75	216.25	222.25	193	196.5	227.25	245.25
401	204.75	133	123.5	112.5	104.5	98.5	93.25	92.25	89.75	83.75	77.25	69	62	58.25	56.5	57.75	55.75	55	53.75	53	51.5	51.75	49.75	48.75	48	43.75	43.75	53.25	71.75	79.5	86.75	90.75	90.75	96	100	105.25	111.25	104.75	102.5	84	54	54	34.75	36	38	39	34.75	39.25	46.25
768	768	266.75	88	73	73.75	65.5	62.75	65.5	65	68.25	63.25	66.75	62	64.25	61	66.5	69.5	69.5	70	68.5	58.25	58.25	68.25	71.5	83.25	83.25	103.5	100	114.25	102.75	111.75	81.75	99.75	80.5	82.25	78.25	70.5	65.5	61.5	50.75	42.5	39.75	40.75	39.75	42.5	46.5	53	60.5	60.5
344	120.25	39.25	37.75	42.75	33.5	32.75	25.25	20.5	16.25	17.25	21.5	26	27.5	30.25	30.25	33.25	30.25	28.25	24.75	22.5	22.5	22.5	23.75	22.5	20.5	19.5	21.25	21.5	25.75	25.75	25.75	20.25	19.75	19.75	23	38.25	61.25	61.25	61.25	39.5	25.25	24	25.25	24	23.5	25	25	26.5	26.5
1636	1230.5	1003.25	823.5	592.75	475.5	475.5	428.75	307.5	148.25	60.75	34.25	36.75	28	37	39.5	52.25	49.5	55	46	36	32	35.5	34.5	35	37.75	39	37.75	37.75	37.75	38.25	46.25	63.75	69.25	69.25	57.5	55	52.75	53.5	59.75	68.25	81.25	83.5	75.5	75.5	61.25	53.75	48.5	46	44.75
516	224.25	82.75	74.5	62.75	90.75	181	434.75	733.5	978.5	1377	1850.5	2131	2300	2300	2234.25	1733.75	1614	1614	1901.25	1947.75	1972.5	1972.5	1924.25	1851.25	1743.5	1743.5	1745.75	1745.75	1739.75	1872.75	1903.75	2060.25	2126.25	2126.25	2062.75	2062.75	2090.5	2264.25	2267.5	2383.75	2343.5	2216	2006.75	2089	1872.5	1881.75	2152.5	2216	2043
632	225.25	83.5	83.5	78.25	115.25	100.75	98.75	48	51.5	51.5	46.5	53.25	73.25	71.25	62.5	62.5	51	51	65	70.5	74.5	78.25	82.25	79	79	66.25	56.25	56.25	49.25	45.25	47.25	42.25	42.25	44.25	53.5	60	68.75	68.75	61.75	53.5	48.5	48.5	50.25	59.25	59.75	95.5	175	185.5	183
599	864.5	925.75	925.75	829.25	746.25	701	681	675.5	678.75	645	594.5	562.5	550.5	539.5	536.25	536.25	536.25	538.5	541	541	541	494.5	411.5	371	371	385.75	387.25	408.5	403.75	403.75	430	580.25	695.75	720.75	720.75	657	622.25	617.5	589.5	605	696.5	847	965.25	1007.25	1033.5	1070.75	1135.25	1270.25	1431.5
1184	497.5	242.75	212.25	198.25	198.25	187.75	163.5	133.25	118.25	111.75	110.25	107	97	89	97	95.25	102.75	102.75	102.25	91.25	84.75	82.5	78.25	80.25	80.25	81	81	81	83.25	80	80.75	77.25	85	77.75	80.25	80.5	87.5	81	80.5	73.25	69.75	62.25	63.5	63.75	72.75	63.75	72	69	75.75
780	242.75	70.25	62.75	52.5	62.75	59.75	45	37.5	46.25	81.75	239.25	283	283.5	427.5	427.5	422	501	505.75	500.5	472.25	459.25	429	416	410.25	422.75	452.25	532.25	586.5	602.75	602.75	645.25	653.25	614	616.5	625.25	612.75	619.5	765.5	1119.75	1519.5	1556.75	1835	2262.25	1835	1383	1016	534.5	530	530
155	134	111.25	98.5	98.5	102.5	119.5	135.5	146.25	165.25	185.75	185.75	192.5	183	171.75	171.75	183	173.25	175.25	167	167	168	177.75	188.25	188.25	176	161.5	167	148	155.75	185.75	198.75	193.25	195	189.5	182.25	174.5	166.25	166.25	166.25	155.5	143	151	153	167	172	183.75	189.75	183.5	202.75
106	106	81.25	66	58.5	56.75	49.5	47.25	47.25	48	46.5	45.5	37.75	37.5	33.25	35.5	34.25	36.5	35.5	35.75	35.5	35.75	32.75	32.75	33	33.75	31.25	31.25	27.75	27.75	29	31	32	33.25	33	31.25	28	27.25	27	24.75	26	30.25	35	35.5	35.5	36.75	34.25	31.5	33.75	33.75
53	53.75	66	71.25	78.75	78.75	70.75	57.75	50.75	50.75	46.25	45.25	39	39.25	37	34.75	33	31.75	32.5	32.5	36.25	37	37	34.25	34.25	34.25	30.75	32.25	36.5	35.25	31.5	31.5	34.5	31.5	28.75	32.75	39	39	38.25	39.75	35	34.5	29.75	30.75	28.75	30.75	30.75	34.75	34.75	37.25
121	103.75	91.25	71.5	77.5	77	82.25	76	76	74.25	74	65.5	59.25	63	52.75	43.25	42	44.5	44.5	46	46.25	48	45.25	40.5	42	39.75	36	36.5	39.5	33.5	33	38.25	38.25	33.25	38.25	40.25	41.25	39.25	39.25	34.5	36.25	34.5	39.75	40.25	47	45.5	46	40.5	42	42
177	145	131.25	117.75	106	99	99	96.25	91.25	83.5	85.25	76.25	70.75	71.75	68.5	64.75	64.75	64.75	65.25	58.5	67	68	65.5	58.5	65.5	62.75	61	55	60	54.25	51	54.75	56.25	51.75	55.75	61.75	59.75	58.5	58.75	55.25	52	50.75	51.5	55	62.5	70	70.25	70.25	72	69.75
128	109	109	15716.2	49432.2	61371.2	65940.8	62300.2	57922	50244.5	48565.5	42940	40113	38224.2	34394.5	27694	23184.2	23184.2	26314.2	37206	49850.8	57495.8	57495.8	57248	49392.2	40482	38422.2	38422.2	37639.5	35771.2	34897.5	30714.2	30714.2	32449.8	38276	36899	41679	45744	48246	48260.8	48260.8	41234.2	35714.8	32822.8	31028	28644.8	24939.2	20003.8	15282	13413.8
120	120	107	91.75	81.5	87.75	82.25	79	78	73.75	72.75	72.75	73.75	72.25	72.25	70.25	67.75	61.5	61.5	53.25	60.75	62	63	58.25	58.25	59	59.25	62	76.75	76.75	63	72.75	127	188.75	228.25	234.75	241.75	391.75	639.75	737.25	737.25	683	658.25	623.75	623.75	634.5	570.75	567.25	578.25	549.75
155	155	129	116	104.5	95.5	87.75	88	87.25	89	83.25	84.25	85	87.5	80	87.75	92.75	94.25	90	90	93	85.25	82.75	87.75	87.75	80.25	72.5	66.5	62.5	62.5	67.5	68.5	82.5	83.75	78.25	79.75	79.75	79.75	595.5	1453.5	2119.25	18666.5	51876.2	56831	56831	31931.2	15932.2	14111.5	14111.5	14801.5
121	124.75	137.75	150.25	146.25	158	160.25	149.75	138.75	132.5	123.25	123.25	115.75	125.25	161.25	172.75	201.5	278.75	467.25	752.25	1133.25	1133.25	1296.25	1118	1152.5	1152.5	5996	12961.5	19162.5	20763.5	20647.5	19296	20035.8	19892.8	19093.8	19259.8	19424.5	18956.2	18707.5	19710	19737.8	22349.2	25371.8	25371.8	24795.5	24870.8	25067.5	26657.2	30061.2	30672.5
944	721.75	630.5	608.25	608.25	609.25	626.5	622.25	618	601	584.5	584.5	584.5	601	584.25	611.75	585.25	573.75	547.75	549	532.25	521	534.75	521	527.5	530.75	540.75	520.5	520.5	487.25	447	447	449.25	477.75	497.75	502.75	513	528.25	540.25	540.25	540.25	500.5	470.75	422.75	380	351.25	395	363.25	370	391.25
696	547.5	483.5	463.25	481.75	478.5	468.5	495.75	499.5	479.75	463.5	478.25	450.75	440.75	455.25	464.25	464.25	464.25	494.75	467.25	458.75	435.25	434	434	449.5	469.25	465.75	485.75	476	463.5	444	441.25	441.25	423.25	406	417.5	443	417	402.5	409.5	396	396	412.5	454.5	449.5	448.25	408.75	376.75	372.5	376.25
213	212.5	209.75	217.25	218	189	194.75	219	461.25	804.75	1114.5	1148.25	1148.25	1108.5	1224.75	1408.25	1586.5	1612.25	1612.25	1585.25	1547.5	1518	1494	1490	1490	1472	1479.25	1460.75	1469	1433.75	1435.75	1418.25	1406.75	1406.75	1449.5	1463	1469.25	1517.5	1489.25	1489.25	1508	1529.75	1547	1584.5	1619.75	1636.5	1667	1661.25	1673.75	1655.75
570	517.25	487.75	487.75	489	477.5	495.5	492.5	477.75	477.75	477.75	469.5	467	450.25	429.5	442.5	428.25	428.25	428.25	449.25	469.25	500	504.5	504.5	488.5	470.5	458	458	461	462.5	478.5	500.25	513.5	529.25	529.25	515.5	511.5	480.25	477.5	483	494	499.5	519.75	521.25	538	557	563.25	548.75	579.75	579.75
450	393.75	409.5	539.25	1040.75	1342	1342	908.75	702.75	513.75	484.5	456.25	471.25	445.25	430.25	438.75	531.5	619.25	672.25	703.5	698.5	652	632.5	663	668.75	685.75	695	750.5	689	691.75	691.75	690.75	690.75	776	795	871.75	896	869.5	882.25	932.25	933.25	931	990.5	933.5	876.25	848.75	886.25	839.5	899.75	954.75
640	719.75	762.25	772.25	772.25	772.25	777.5	783.75	749.25	631	562.5	495.25	493	507.5	537.5	537.5	527	549	542.5	515	549.5	590	649.25	674.25	674.25	605.25	594.75	515.75	462	423.75	429.75	429.75	436.5	493	493	498.25	481.75	459.5	445	445	445.25	445.25	491.75	583.75	622.25	622.25	553.5	412.25	314.75	314.75
11210	7587	2700.75	472.75	457.25	439.25	423	437.5	432.5	433.25	454.25	454.25	436.75	454.5	428.75	420.5	432.75	449.75	429.75	449.75	470.75	503.5	524.25	524.25	519.25	497.5	471.25	442.25	425	423.5	412.25	412.25	431.5	434.75	448.75	448.75	426.75	400.75	400.75	381.5	381.5	359.25	372.25	340.25	343	376	376.25	349	361.75	364.25
449	396	392.5	357.5	352.25	352.25	357.25	358.25	381.5	555.75	830.5	962.5	962.5	939.75	851.75	739.75	710	642.25	629	553	498	498	540	574.25	640.25	661.25	661.25	697	763	796.25	796.25	781.5	781.5	770.25	760.25	766.5	780.5	784.75	798.75	812.25	831.25	824.75	824.75	848.25	879.25	895.25	935.5	935.5	902.5	888.25
1001	955.5	910.25	872.75	829.5	787.5	753.5	751	730.75	730.75	729	737.75	718	693	635.75	591	550.5	503	460.25	406	359	349.25	349.25	349.25	393.75	434.5	461.5	461.5	504	560	581	591.5	581.75	591.75	603.25	618.5	629.5	648.25	661	710.25	739.75	749.5	760.75	778.5	778.5	773.5	779.5	763	736.75	743.25
228	215.25	215.25	223.25	223.25	223.25	248.75	222.75	202.25	219.5	222.5	228.5	251.75	251.75	251.75	316.5	420.25	564.25	685.25	710	772.25	859.5	970.75	1077.25	1084.75	1084.75	1033.75	1037.25	1012.25	1086.75	1166	1166	1166	1254	1200.25	1279.5	1511	1378.75	1361.25	1361.25	1270.25	1270.25	1165.5	1236.25	1237.25	1292.25	1177	1266.25	1266.25	1277.75
1243	724.5	537.75	537.75	625.5	1012.75	1012.75	1003.75	818.25	569	537.75	580	639.25	639.25	610	610	569.5	564.75	586.5	584.25	584.25	596.75	613	615	597.75	595.25	511	429.75	429.75	414.25	490.5	611.25	649	801	1019	1071.5	1294	1294	928.25	1195.25	1424.25	955.25	4356.75	10755	10755	13930.8	13930.8	13891.2	14284.5	13946.2
757	880.5	893	1007.25	1011.75	917.25	869.75	894.75	880	898.5	946	1110.75	2651.5	5585	4303	4303	4319.25	2510	2009.5	1591.25	2009.5	2278.25	2058.75	1609.5	1592	1470.5	1383.75	1638.5	1916.5	2004.5	2005.5	2005.5	1868	1694.5	1674.75	1571.5	1716	3384.75	5432.5	8912.25	16241	22665.2	23077.2	23682.2	24464.5	24464.5	26512	32808.5	32808.5	24398
528	449	408.25	401.75	401.75	391.5	357.75	334.25	356	356	458.5	556	587.5	600.5	651.25	1004.75	1777.5	2314	2597.75	2713	2752.25	2752.25	2858.5	2920.75	2920.75	2899	2928	2902.5	2783.75	2932.5	3130	3014.75	2930	3125	2900.75	2865.5	2990.75	3085.75	3293	3541.75	3854	3963	3931	3931	3963	4021.25	4159.25	4284.75	4415.25	4563
604	606	629	642	659.25	608.25	624	608.25	592.5	571	571.75	536	524.75	524.75	487.25	428.5	438.5	379	375.75	432.5	433.5	380.75	386	379.5	371.75	371.25	375.75	371.25	367.75	369.75	374.25	369.75	355.25	337	327.25	327.25	355.25	400.25	399.5	405.5	405.5	389.5	380.25	384.25	384.25	370.25	363.5	363.5	382.25	384.25
773	767.75	751	724.25	695.25	666.25	639.25	618.25	618.25	624.5	718.75	943.5	943.5	739.75	700.5	543.25	520.5	480.5	480.5	666	1123.25	1572.75	2075.25	2717.5	2853.5	4014.75	3976.5	2795	2718.25	2948.25	2948.25	2948.25	2970.25	2788.75	2644.5	2644.5	2637.5	2489.75	2326.25	2229	2193	2183	2183	2221.5	2284.75	2322.5	2335.25	2380.5	2482.75	2573.75
571	571	509	485.25	463.5	453	431.75	408	390.25	407	416	416	436.25	880.75	1619.25	2153.5	2246.75	2245.25	2271	2271	2224.25	2177.75	2147	2147	2157.75	2218.75	2274	2362.75	2395.5	2528.75	2528.75	2401.75	2460.5	2468.5	2460.75	2745	6573	18845.2	31634.2	31634.2	28724	13220.2	5506.5	5506.5	5134.25	5289.75	5007	5223.5	5223.5	5376.75
486	608.75	701.75	764.25	764.25	764.25	736.25	712.25	680.5	634.25	634.25	643	648	642	721.25	643.5	574	583	585.5	585.5	628	658.75	675	675	650.25	591.5	491.75	475.75	434.5	453.75	483.25	483.25	418.75	450.25	400.75	398	455.5	493.25	515.75	550.25	555.5	579.5	555.5	535	501	521.25	510.75	597.75	718.25	750
794	748	719.25	719.25	716.25	753.25	767	767	673.25	736.5	685.5	612	614.75	614.75	530.75	498.75	498.75	521.75	558	688.25	782.75	704.75	746	807.5	748.5	729.25	680.5	727.5	634.25	634.75	749.5	749.5	749.5	733.25	817	1935.5	2834	3251.5	3251.5	2018	1038.5	559.75	540.75	588	588	762	654	629.5	711	807.25
82	72.25	68.75	69.25	59	62.25	80	48741.5	149215	202692	203952	204588	203659	203659	203495	204403	204896	205910	208602	212686	215140	215140	210966	205167	201759	201154	201180	202578	204174	206606	208082	207970	208808	209369	210456	210125	211051	210634	210684	210442	211448	210442	210410	210272	209388	208236	206990	205708	203573	202149
140	131	127.75	125.25	110.75	110.75	5515.5	15912.5	21334.2	21675	21471.5	21438.5	21445.5	21530.2	21434.5	21338	21338	21677.2	22224	22852.2	23317.2	23927	24135.2	24135.2	23811.2	21421.8	16734.8	14853.8	11718.5	8320.75	5409	4355.25	4355.25	4598	0.001	0.001	0.001	0.001	0.001	0.001	0.001	0.001	0.001	0.001	0.001	0.001	0.001	0.001	0.001	0.001
155	114	95.25	95.25	92.75	93.75	116.75	154.25	220.5	224.25	229.25	205.75	189.75	189.75	349	509.75	557	557.5	546.5	542	542	534	537.5	546.25	638	816.75	866.75	869	825.75	744.25	718	716.75	623.75	664.5	889.25	1207.25	1305.25	1460.25	1425.25	1353.25	1199.25	1191.5	1191.25	1158.5	1154	1239	1342.25	1392.75	1488.75	1559.25
444	375.5	319.5	255.25	238.5	268.5	268.5	288	295.75	305.25	305.75	343.25	524.5	754.75	858.75	875.25	875.25	881.25	930.25	1043.25	1062.75	993.75	1064.75	1119.5	1193.25	1219.75	1248.75	1210.75	1122	1074.5	1111.5	1087.5	1086.75	1072.75	1095.75	1076.25	1076.25	1149.5	1147	1221.5	1277.5	1284.25	1287	1295.75	1295.75	1295.5	1243.25	1173.25	1107.5	1107.5
3616	3673.5	3697.25	3842.5	3871.5	3871.5	3648.75	3623.25	3477.25	3477.25	4595.25	8889.75	15583.2	20409.5	21272.2	21272.2	18664.5	13937.2	12337.5	11224.5	11305	12472.5	12601.2	11920.2	11920.8	11877	11877	11877	12343	13076.5	13777.8	14235	14514.2	15082	15839	16590.2	17364.5	17788.5	17788.5	17758.5	18139.5	18113.5	18296	18989.2	20145.8	21351.2	22550.8	22550.8	21930.8	21376.5
71	70.75	68.25	68.75	73	75	75.75	79	75.75	68	57.5	56.25	56.25	60.75	60.75	66.25	63.5	57.75	57.5	63	59	80.75	87.25	86.25	61.75	65.75	58.25	58.25	67.75	121.5	182	225	281.25	226.25	256.75	422.25	416.25	312	298	203.25	203.25	203.25	257.5	399.25	393.25	311.75	413.5	417.25	417.25	449
16606	16973	16973	17829	18708.8	19145	19327.2	19327.2	19206.2	18872.8	18705	18588.2	18148.2	17469.5	17269.8	17269.8	17522.5	18020.5	18373.5	18598	18699.5	18750	18781.5	18781.5	18772.5	18684	18605	18605	18752.5	19076.5	19253.8	19325.5	19497	19585	19809.8	20050.2	20206	20268.5	20268.5	20204	20236.2	20236.2	20253.2	20361.5	20361.5	20481.8	20584.8	20800.5	20898	21046.8
137	137	119.25	112.75	96.5	97.25	97.25	174	316.5	381.5	381.5	381.5	477.25	625.75	711	711	649.5	516.5	516.5	600	988.5	1046.5	1046.5	767	604.5	581	581	581	573	618	563.25	563.25	829	1008.75	1381.75	1381.75	1117.5	946.25	963.25	922.75	832.75	854	1029.5	910.25	823	1185.75	1892	1556.5	1555.75	1615.75
61	59.5	56.75	56.75	59	91.5	171.25	236.25	260	271.25	281.75	298	295.75	294.25	312	270.25	288.5	293.5	296.5	268	281.5	281.5	290	305.5	305.5	322.5	522.25	1055.75	1205.25	1205.25	948.25	1093.25	8303.25	23017.8	30801.5	32908.2	36390.8	38251	38251	38617.8	38223.2	37829.2	37843.5	38348.8	38251.8	38489	38601.2	38699	38699	39029.8
176	165.75	157	151.75	148.75	140.5	130.25	124.5	121	121	121.5	127.75	137	151.25	180	199.25	199.25	175.25	199	180.25	166	166	154.75	146.25	146.25	150.25	165	176.5	189.75	189.75	206.25	216.25	282.75	367.5	612.25	612.25	538	300.25	329.25	265.5	279.5	281.75	339.25	331.5	352.75	344.5	330.75	270	246.75	246.75
3225	3031.5	2680.25	2573.75	2663	2663	1969.5	1125	1125	1321.5	2128	2461.5	2461.5	2466	2466	2392	2578.75	2767	2779.5	2782.25	2782.25	2767.75	2786.25	2639.75	2624	2785	2881	2888.5	2954.5	2954.5	2856.25	2856.25	2954.25	2650	2569.75	2569.75	2472.75	2440	2582.25	2610.5	2720.75	2649.25	2862	2930.5	3274.75	3274.75	3510.25	3428.25	3365.25	3017.75
88	99.75	101	101	98.25	98.25	104	230	466.75	619.5	692.5	710.75	768	735	721	668.5	715	764.75	931.25	927	1005	912.25	810	810	839.75	767	765.75	728.25	698.5	698.5	743.5	825.75	901	1034.75	1259.5	1439.25	1645.25	1971.75	2036.25	1805.75	1805.75	1558.25	1558.25	1545.5	1598.5	1638.25	1638.25	1575	1575	1506.25
151	245.25	245.25	232.5	189.25	98.25	90.75	90.75	85.75	77.25	121.75	126	83.5	80.5	89.5	80.5	81.25	86.75	92.5	100.25	147.25	157.25	222	306.25	388.75	403.5	467.5	435.5	479.5	596.25	693.25	623.25	702.5	702.5	671.75	691	729.5	655	819.5	1193.5	1295	1917.5	2212.5	2245.25	2359.25	2694	3111.5	3147.5	3500.75	3639
105	107	248	247.75	674	1165.75	1390.5	1423.5	1423.5	1346.5	1247.5	1235	1171.5	1216.5	1283.75	1337.75	1345.5	1391.75	1428.25	1428.25	1440.25	1471.25	1490	1511.25	1543.5	1538.25	1545	1560.5	1560.5	1530.25	1484.5	1465.25	1420.5	1387.75	1405	1399.5	1386	1423	1463	1461.25	1483.25	1483.25	1468.5	1438.75	1440.75	1420.25	1417.5	1418.5	1398.75	1370.25
1304	951.75	406.75	123.5	103	120.5	161	189.5	236.25	236.25	332.25	233.5	230	195.5	190	190	188.5	181.5	187	295.25	359.25	392.25	401.25	342.5	315.75	313.25	328.75	343.25	342	373	379	381.75	375.25	393.25	413	417.5	428.25	433.75	429.25	421	414.5	406	406	542.25	902.75	908.25	908.25	1263.5	918	567
142	114.75	104.25	104.25	98.25	104	131.5	192.5	205.5	205.5	169.5	164	154	156.75	234.5	301.25	506.25	17871.2	56323.5	81753.2	84561.2	86936.5	85891.2	85449	83831.2	84273.8	82998.8	82200	81305.2	80193.2	72015.2	58762	47838	38688.5	29373.8	22588.8	18007	0.001	0.001	0.001	0.001	0.001	0.001	0.001	0.001	0.001	0.001	0.001	0.001	0.001
255	224	201	201	179.25	179.5	169.25	157	147.25	159.5	200	278	330.5	340	330.5	321	294.75	299.75	267.5	267.5	240.25	230.5	218.25	216	227.5	245	255.75	338	338	363.25	367.25	301.75	301.75	342.75	343.75	343.75	360.25	313.25	307	273.75	278.25	252.25	234.75	234.75	247.25	235.75	239.25	254.25	237.75	233.75
153	101	108	97.25	91	98.75	107.25	133	146.5	165	165	140.5	140.5	129.5	210	267.5	270.5	146.75	145.75	103.25	103.25	94.25	93	81.5	82	82	82.75	83.75	95	122.25	117	109	116.75	95.75	95.75	95.75	94.5	84.75	85	83.25	84	79	79	79	75.25	96.5	97.75	97.75	76.75	75
41695	34059.2	26729.2	21740.8	21740.8	44240.5	100063	143782	158028	157813	163480	168356	175178	174822	159968	119222	68231.8	1678	0.001	0.001	0.001	0.001	0.001	0.001	0.001	0.001	0.001	0.001	0.001	0.001	0.001	0.001	0.001	0.001	0.001	0.001	0.001	0.001	0.001	0.001	0.001	0.001	0.001	0.001	0.001	0.001	0.001	0.001	0.001	0.001
137	110	100.25	94.75	108.25	108.25	95.75	97.5	123	150.5	191.5	229	223.75	265.75	299	351.75	435.5	499.25	563	635	693.25	695.25	714.5	798.25	808	820.5	894	854.5	854.5	903.5	939.5	927.5	934.5	943.5	939.5	912	939.5	1033.25	1237.25	1377.25	1437	1437	1403.75	1403.75	1387	1376.5	1374.5	1428.25	1428.25	4819.5
41	38.5	38.5	35.5	32.75	32.25	32.5	29	29.5	31.25	33.25	274	762.5	994	994	994	17233.8	63737.2	110415	128242	131055	131639	131502	130810	130367	128601	128548	127658	127296	126348	124700	120987	116978	114466	112476	110694	110160	109786	108598	106541	103169	100612	96705.2	88194.2	76335.5	63007.2	49171	0.001	0.001	0.001
86	65.75	65.75	63	174.75	190.25	191.5	82.75	98	98	115.25	150.5	240	369.25	452.25	510	619.75	869	1007.75	1119	1119	1028.75	1065.75	1375.75	1291.75	1383.5	1390.5	1214.25	1184.5	1147.75	1112.5	1112.5	1144.5	1113	1116	1162.5	1115.5	1115.5	1252.5	1432.5	1551.5	1622.75	1687	1724.75	1775.25	1786.75	1786.75	1797	1797	1739.25
86	86	58.25	70	68.5	68.5	88.25	140.75	143.75	171.75	166	181.75	181.75	194.75	229	246.25	282.75	333.5	327	300.75	346.75	353.75	362	529.25	529.25	529.25	553.75	761.25	522	868	649.5	654	439	449	449	452.5	466.5	466.5	454.5	467.75	458.75	487.5	497.25	560	560	610.25	605.75	605.75	532	428.25
559	487.5	453.75	390.5	391	454	417.5	378	372.5	403.25	352	327.75	344.5	354.25	354.25	367.5	396.75	385.5	388.5	388.5	425.5	430.25	491.75	491.75	447.25	386.5	393.5	396.25	498.5	605	657.75	686.25	690	708.75	731	740.75	799.5	1163.5	1135	1845.75	2704	3608.5	4033.5	4033.5	4227.5	4299.5	4156.5	4401.5	4527.25	4472.75
16	19	19	22.75	22.5	28	27.5	38.5	33.75	31.75	23	23.25	23	23	27	26.5	26.5	36	37	57.5	82	93.75	84	93.75	101.25	120.25	140.5	140.5	139.75	130	130	115.5	105.5	105.5	88.5	84	84	86.25	90	93.25	92	92.5	92.5	92.5	96	95.5	86.25	78.75	76.25	67.5
76	82.75	82.75	87.75	95	91.25	84	94.25	93.75	92.25	104.75	104.75	101.25	103	97	97	101.5	96	102.5	102.25	102.25	95.5	94	88.75	87.75	87.75	89.25	97	102.5	102.5	95.5	104	101	100.25	100.25	99.5	94.25	92	92	98.75	110	119	119	116.75	115.25	112	107.5	110.25	110.25	101.5
65	62.25	74.25	73.5	71.5	71.5	62.5	56	55.5	55.5	83.5	132.25	157.5	157.5	157.5	152.25	140.5	160.5	161.75	139.5	150.25	156.75	152.5	152.5	157	145.5	140.75	140.25	149.5	149.5	152.5	152.5	151.25	155	152.5	157.25	159.25	165.75	160.25	165.25	162.25	162.25	160.5	159.25	156.5	157.75	167.5	177.75	183.5	184.25
105	105	157.75	241.75	285	285	263.75	235.75	208.75	207.75	206.25	206.25	221	221	232	283.5	358.5	389.5	389.5	360.5	338.25	299.5	299.5	403.5	590.25	724	756.75	762.25	762.25	765	784.5	786.25	745.25	785.5	774.5	765	773.5	797	778.5	776.75	770	769.75	733	753.5	762.5	801.5	757.5	752	710	708
156	130.5	109.75	90	75.75	75.5	79.25	76.75	76.5	80.75	76.5	69	70.25	70.75	65.5	70.75	74.75	75.5	83.25	83.5	85.75	88	82.25	78.75	79	85.25	78	84.5	93	93	89.5	89.5	81.75	81.5	87.5	81.25	90.25	95	97.25	90.25	94.75	90	82.25	82.25	82.75	82.5	82.5	80.75	78.5	83
275	208.25	210.5	181.75	181.75	214	286.75	271.75	325.25	341.5	341.5	399.25	399.25	394	368.5	344.5	319.25	319.25	289.5	224	206.5	179	154.5	189	203.5	222	296.75	353	363.5	409.75	415.5	415.5	390.25	390.25	389.25	423	413.5	424.5	434.5	456	475.75	483.75	522	518	477	412.25	330.5	295.25	252.25	184
101	76.75	63	62	62	53	62.5	66.5	68.75	68.75	68.75	66.25	65	64.75	62.25	64.25	65.75	69	84	94.5	126.25	132.75	113.25	106.25	112	107.75	102.75	102	102.25	102.25	104	107.5	204	227.25	230.25	126.5	152	133	119.75	116.75	126.25	126.25	127.25	134.25	134.25	138.5	138.5	208.25	342.75	431
193	181	172.75	168	167	162.25	173	173	175.5	176	178.5	178.5	181.5	188	195.5	195.5	195.5	194	193	201.5	212	212	218	238	242	260.75	260.5	238.5	214.25	223.75	218	235.25	234.25	243.5	234.25	233.25	238.25	248	255.5	272	283	273.5	273.5	301	338	291	308	341.5	341.5	340
93	71.5	60.25	53	47.75	44.5	42	39.75	38	37	37.5	36	34.25	35.75	37.75	39.75	43.75	44.25	44.25	44.25	44.25	41.5	38	36.75	36.75	34.5	35.5	35.5	34.75	33.5	34	35.25	36	40	40	38.5	40	107.5	238	299.25	312.25	302.5	313	306	317.25	317.25	323.5	322.25	328	336
1353	1314.75	1310.5	1244.75	1144.75	1059.5	1059.5	1059.75	1059.75	1083.25	1113	1073.5	1015.5	1011.5	953	930.25	959.25	951.25	926.25	906.75	849.75	832.25	832.25	869	940.75	1004	1004	1004.5	1017.5	949.75	905.75	901.75	871	827	821.75	821.75	852.75	845.5	865.25	880	866.5	897.25	895.25	821.25	765.75	738	720.5	733.5	733.5	727.5
21	28.5	38.25	46	37.75	41.75	49.25	40.25	43.25	56	60.75	64	70.25	77.25	87	91	97.5	97.5	102	98.5	84	77.75	74.5	66	55.5	56.25	90.75	177.75	218.75	243.75	236	233.25	174.25	119.5	119.5	78.75	78.75	103	111	109.75	129.5	129.5	120	110.25	82.75	82.75	112	90.25	91.75	91.75
94	132.5	136.5	136.5	114.75	100.5	100.5	94.75	96.75	107.75	106.75	96.5	96.5	93.25	87.5	87.5	565	1308.75	1911.75	1996.5	1976	1897.75	1897.75	1798.75	1705.25	1685.5	1685.5	1680	1749.5	1779	1758.5	1655	1705.75	1652.5	1649.25	1655	1655	1606.75	1548	1536	1480	1481.25	1558.25	1579.25	1650.25	1744.25	1650.25	1594.75	1586.75	1597.5
472	568.25	578.25	578.25	510	429.75	348.75	305	296.25	296.25	307.5	437	677.75	820.25	833	837.5	837.5	819.5	801.75	815	815	859.75	865.75	865.75	889.5	914	1154.5	1573	1956.25	2061	1996.25	1981.5	1981.5	1981.5	2019.75	2125	2251.5	2301.25	2298.75	2298.75	2189.25	2063	1992.75	1992.75	2038.25	2098.25	2232.25	2260	2260	2201.25
3105	1907.25	1485.5	1455.75	1438.5	1420.25	1340.75	1169.25	1076.25	1037.5	1009.75	969.75	959.25	959.25	977.5	1031.25	1036.25	1060	1039.5	1008.75	979	940.25	940.25	890.5	876.25	803.75	805.5	805.5	841	1013.25	1224.75	1284.75	1309.5	1342.5	1293.75	1254	1306.75	1299.5	1294	1325.5	1320.5	1319.75	1319.75	1289.5	1245.75	1236.75	1236.75	1283.75	1351.5	1364.75
893	856.5	757	594.75	594.75	487.25	412.25	342	345.25	327.25	340.25	359.25	359.25	359.25	351.5	357.5	348.25	363	348.25	371	364.25	365.75	350	351.25	351.25	356.75	369	369	365.75	340.5	315.75	301	301	311	338.25	405.5	435.25	435.25	417.25	411	407.25	407.25	411.75	427.75	451.5	461.5	480.75	494	481.25	479.25
241	230.25	216.75	202	185.5	168.25	168	165.5	165.5	173.5	176.25	166.5	164	144	135.75	135.75	136.5	138.5	148.5	163.75	171	180.25	189	189	172.75	186.75	179.75	175.25	183.25	194	183.25	176	175	174.25	174.25	185.5	273	274.75	274.75	187	177.5	165.75	158.75	153.25	150.25	148.5	149.5	151.75	152.5	156.5
186	175	156.5	140.25	132.75	124.5	118.5	113.75	113.25	113	104.75	101.75	101	108	101	101	95.5	88.25	84.25	82.25	84.5	81.5	79.75	81.5	81.5	77	72.75	72.5	67.75	72.5	72	71.75	68	75	76.75	81.25	81.25	86	79.25	71.5	72	73.25	70	75.75	78	78.75	83.25	91.25	84.25	92
193	164.25	172.5	158.25	147.25	148	144.5	144.5	144.5	146.75	136.5	129.25	121	122	113.5	121.25	110	103	91.5	94.5	94.5	102.5	106	109.5	110.25	109.5	106.25	109.5	106	106.25	111.5	124.25	121	121	112	98.25	89.75	96.25	99.25	98.25	105	105	110.5	110.25	111.25	104.75	108.75	108.75	107	110
21	28	28.5	33	37.75	38.75	34.5	38.75	38.75	37.25	36	38.75	35.75	32.25	28.75	31.25	33	40.25	42.25	42.25	39.5	39.5	39.5	41.75	42.25	42.25	42.25	39.25	36	35.25	35.5	34.75	35.25	35.5	37.25	37	48.5	36.25	47.5	40.5	40.5	29.25	30.75	28	30.75	32.75	36.25	38	38	39.5
108	111	111	120.75	140.75	185.25	381	770	1013.75	1093.25	1105.5	1105.5	1108.75	1109.5	1139	1175.25	1168.75	1144.25	1144.25	1162	1147.75	1178.75	1225.25	1264.75	1262.5	1262.5	1304.5	1268	1236	1222.75	1271.75	1241.25	1267.25	1308.75	1327.5	1305.75	1305.75	1305.75	1336.25	1365.75	1417.25	1437	1479	1452.25	1469.5	1442.5	1476.25	1488.75	1606.75	1718.75
80	66.25	60.25	57.5	53.75	48.25	48	47.25	48.5	50.75	50.75	47	42.5	36.25	36.25	30	27	28.25	26.75	26.75	26.75	34.75	32.25	38.75	35.75	36.25	31	35.75	31	31	31.5	36.25	31.5	32	28.25	26.5	24.5	21.75	21.25	21.75	21.75	20	22.25	23	27	24.5	32	32.75	31.75	29.75
1656	904.25	407.75	170.25	118.25	120	116.75	107.75	107.75	109.75	105.25	97.25	95	85.75	80	80	81.25	85.5	85.25	85.25	80.5	79.25	79.25	77.75	78.25	76.25	79.5	78.75	86.75	94.75	96	91.75	94.75	92	86	89	88.5	75.5	89.25	94.75	78.25	80.75	83.5	81.75	81.75	81.75	81.25	81.75	83.5	75.75
206	173	147.25	147.25	133	150	153	194.75	169	173.75	144.5	141.75	133.25	134.25	134.25	130.75	131	134.75	133.75	129.75	127	125.5	125.25	125.25	142.75	173	193	200.5	209.75	221.25	230.5	219.5	240.25	267.5	258	251	252.5	243.75	243.75	249.75	259	259.5	256	244.5	244	234	232.75	227.75	239	230
288	287.5	287.5	286	277.75	287.5	274.25	265.75	248.5	248.5	248.75	238	235.25	239.25	249.75	239.25	232.75	241.75	232.75	214.25	228.25	216.5	187.75	174.25	165	159.75	156	150.75	148.5	140	140	140	142	131.5	135	126.5	133	133	135.5	141	141	149.5	137.75	129.75	124.75	115.5	115.5	112.5	111.5	112.5
191	191	150.75	126	206	220	444.75	576.75	604.25	640.5	675.5	672.5	676	625.25	592	574.75	592	593	597.5	593.75	595.75	577.25	553	528.25	517.75	507.75	507.75	506.25	525.25	555	587.5	588.25	596.75	589.25	590.5	590.5	615.25	607.5	632.75	633	624	603.5	624	622.75	618.75	643	661.75	649.5	639.5	637.75
112	73.25	107.25	82.25	66.25	77.25	77.25	77.25	75.75	98.5	91	94.5	68.75	68.75	61.5	54.5	53.5	50	48.25	49.25	51.5	51.5	51.5	51.25	49.25	48	46	48	47	49.25	46.75	46	46	47.25	45.25	45.5	45.5	44	44.5	47	47	47.75	47.75	46.25	44.5	43.75	44.5	46.25	46.5	46.5
76	53.25	47.5	47.5	52.25	55.25	55.25	50.75	41	40	40	46	50.5	50.5	54	53.5	49.5	51.25	55.5	50.25	42.25	52.5	42.75	39	44.75	52.75	50	50.5	50.5	45	45	106	240	311.5	326	329.25	346.25	356.5	363.5	374.25	370.75	385.25	385.25	402	426.5	435.25	406.5	417.75	399.25	399.25
2274	2092	1846	1506.25	1220	1112.25	975	834.75	744.75	703	636.5	548.25	505.75	505.75	483.75	444.75	421	421	504.75	668.25	773.5	818.25	813.25	870.5	884.5	884.5	869	859.5	797.5	789.5	789.5	790	790	773	764.25	764.25	819.5	832	832	773.75	611.25	600.25	488	591.75	638.75	766.25	888.5	972.5	972.5	1001.5
57	50.75	50.75	50.75	183.75	183.75	183.25	37.75	32.25	32.25	32.75	37	43.5	49.25	49.25	49.25	46.5	49.5	124.25	275.5	354	354	348.5	352.25	347	333.75	351	338	299.75	300.5	310	294.75	294.5	293.75	297.75	282.5	281	271.75	276	265	261.25	274.5	292	260.25	272.5	278.75	281.25	272.5	287.75	310.75
55996	14126.5	14126.5	183.75	181	186.25	199.75	213	202.5	198.75	206	199.25	187.75	181.75	156.5	142.75	142.75	143.5	143	143	151.25	151.25	164.5	168.5	178.25	177.5	176.75	172.5	182.75	171.75	172.25	167	172.25	344.5	674	865.5	874	872	876.5	876.5	815	769.5	705.75	705.75	715.25	725.75	702.25	715	715	736.25
871	871	846	830.5	829.5	829.5	989.25	1008.75	1159	1159	966.25	869.75	839.5	838.25	818.5	820.5	821.5	821.5	821.5	824.5	823.25	800	793.75	726.5	699.5	699.5	725.75	725.75	776	764	690.25	666	682.25	682.25	706.25	726.25	726.25	751	720.5	693.75	671	687.5	681.5	686.75	685.25	715.5	685.25	707	748.25	739
101	80	63.25	63	71	68.75	61.75	66.25	64.25	64.25	64.5	64.5	63.25	63.25	63.25	61.75	84.5	84.5	84	61.5	61	59.5	59	59	58.75	58	57	57	56.25	56.25	55.75	58.5	60.25	57.5	49	52.5	52.5	44.75	52	51.25	46	40.25	44	44	49	55.75	55.75	53.5	47.5	41
1794	633.75	236.75	221	202.25	202.25	3461.5	9527.5	13084	13084	12849.5	13082.2	35348.8	75634.8	95831.2	96198	95614	95614	97259.8	98189	98189	96964.2	93302.5	87921.2	74982.5	57595.8	50051.5	49971.2	50020.5	50014.5	50014.5	49956.2	49965.2	49887.2	49831.2	49840.2	50063	50428.2	50821.8	50980	51129.5	50980	51142.5	51376.8	51359.8	51523.8	52015.8	51861.2	51961	52573.5
709	664	564	448	399.5	368.5	387	400	377.5	341.25	354	340.75	340.75	329.25	330	311.75	309.5	297	309.5	304.5	287.75	277.75	277.75	277.25	271.75	271.75	257.25	244.75	244.75	245	245	263.75	278.5	286.25	286.25	298.75	317.5	7461.75	21070	28522.2	28750.8	28750.8	28783.8	29096.2	29187	29301	29590.8	29364.2	29240	29204.8
197	179.25	179.25	5041.75	14938	20659	20659	19125.5	17519.5	16154.5	15645.8	15225.8	15122.5	15103.8	15246.5	15405.2	15434	15629.5	15629.5	15415.2	15333.5	15359	15359	15428.8	15449.5	15457.2	15613.8	15411.5	15393.5	15271.8	15344.8	15331.2	15331.2	15148.8	14839.2	14153.8	14100.8	14290.8	14255.2	14568.5	14716.8	14825	15045.2	15145.5	15145.5	15266.2	15277.2	15033.5	14743	14539.5
70	62.25	71.25	67.5	59	62.75	58.75	58.75	54.75	61	57	61	63	63	54.75	51.25	52.75	51	58.25	63.5	66.25	63.5	66	64	61	55	61	55.75	53.5	58.25	56.75	55	59	59	49.75	49.5	45	45	48.5	40.75	52.25	51.5	42.25	32.5	36.5	36.5	37	40	40	43
149	139	130.5	119.75	119.75	117.25	99.75	96	95.25	101.25	110.75	127	140	140	131	122	126.75	124.75	122	122	108.75	91	90.75	92	92	98	91.5	307.25	92	93.5	79.25	79.25	78.75	69.5	67.5	64.25	63.75	63.75	333.75	13199.2	38473	51479	51894.5	52055.5	52178.5	52365	52489.2	52900.5	53256	53388
56	67.25	70.5	76.5	70.5	69.5	82.5	119.5	84	99.75	100.25	80	70.25	77.75	86.5	146.5	233.5	285.75	285.75	273.75	273.75	252	246.5	250.5	253.5	253.5	249.25	264.25	266.25	258	292.25	292.25	325	314.75	323.25	327	358.75	344.75	346.5	360	353.5	353.5	378.25	388.75	388.75	385.75	361	341.75	336.75	336.75
40	37	34	29.25	28.25	29.5	29.25	28.25	28	25	23	25.75	26.5	24.75	25.5	25.25	23.5	23.5	23.25	20.5	19.5	18.75	18.25	19.5	1282	3756.5	5480.75	7563	16261.5	31187.2	38284.8	38324.8	38324.8	34226	25402	17611	14506.2	13269	9355.5	0	0.001	0.001	0.001	0.001	0.001	0.001	0.001	0.001	0.001	0.001
147	134.75	115	114	104.25	111.25	117.25	117.5	117.5	124.25	117.75	112.5	109.5	102.5	91.5	92.5	92.25	101.5	101.25	101.25	101.25	98.25	98.25	105	120.75	124.75	126.25	117.75	118.5	118.5	126.75	127.25	127.25	117.25	106.5	96.75	85.75	77.5	74.5	74.5	78.5	87.25	85	99	88.25	91.75	79	79	65	58.75
39	32	27.5	24.75	21.25	21.25	20	17.25	17.25	20	17.25	16	15.5	15.75	15.75	16.75	17	17	19	21.75	56.75	58.75	58.75	57.25	23	21.75	18.5	16.75	16.75	15.5	16.5	17.25	16.75	17.25	17.75	20	23.75	23.75	20.75	20	34.25	16.75	18	20	20	18.75	19.5	19.5	17.5	18.75
74	67.75	53.75	53.75	52.5	45.25	55.5	57.25	48.25	44.75	48.25	48.25	49.75	49.75	54.75	50.5	40.25	36.5	39.25	39.25	38.75	44.25	44.25	43.75	43.75	8876.25	27394	37502.8	37701.8	37701.8	37063.5	35407.2	32404.8	29208	27108.2	25515.8	22582.8	18391.8	14888.5	12793.8	11466	10541	10002.2	9723.75	9620	9515.5	9390.25	9229.25	9038.75	8798
149	137.25	116.25	101.75	101.75	91.75	97.5	99.75	107.25	217.5	379.25	413	530.75	6674	19369.8	26683.5	27903	27903	28782.2	29377.8	29836.5	30599.2	31486	31950.2	32288.2	32999.5	33886.5	34720.8	35421	35829.8	36133.2	36317.8	36560.8	36687.5	36844.2	36838.5	36913.8	37110.5	37405.8	37735	37774.8	37807	37794.5	37902.8	37803	37829.5	37905	37898	37851.8	37892.2
642	521	461	461	5209.5	14266	19014.2	19014.2	18371	17546.8	16906.8	16462	16331.8	16331.8	16280.5	16268.8	16411.5	16546	16387.8	16151.8	15782	13126.5	10962.8	8628.75	8233.25	9455.25	10687.2	11587	11708.8	11708.8	11216.8	8424	4525.25	1328	0.001	0.001	0.001	0.001	0.001	0.001	0.001	0.001	0.001	0.001	0.001	0.001	0.001	0.001	0.001	0.001
58	58	52	54.5	64.5	71	11163.5	34026	43170.2	44874	46832.2	46644	47568.2	49921	51141.8	52770	52770	54044.5	52388.2	52228.2	51679.5	51679.5	50180.5	46343.8	38665.8	28923.5	22149.2	19685.2	19685.2	20255.2	22681	25680	29565	33651	36241.2	36995.5	37124	38024.5	39982	41254.2	41254.2	40730.2	39626.5	38596.5	38302.5	38558.8	38558.8	38225.8	38333.5	37999.5
66	82.75	82.75	70.5	44.75	37	37	49.25	69.5	103	148.25	225	284	320.5	320.5	355.75	339.25	339.25	297.5	297.5	3469	11503.8	15088.2	18418.5	20581.5	21244.5	22097	22611.5	22976.2	23217.8	23357.2	23338.8	23510.8	23541.5	23931.8	24281.8	24890	25115.5	25115.5	25284	25264.5	25657.8	25575.8	25575.8	25101.5	25199.5	25021.2	25021.2	25342	25342
77	73.5	64	55.75	49.75	48.25	48.25	43.25	38.75	41	41.5	40.5	43	43	39.25	37.75	37.5	37.5	37	41.75	46.75	51	51.75	58.25	56	54.25	46	43.75	43.75	45.5	45	46	49.5	49.5	53.75	55.5	55.5	54	52.5	49.25	49.25	50.5	357.5	1014.25	1388.75	1388.75	1369.5	1258.75	1207	1207
32	34.75	30	25	30.5	22.25	18.75	22.25	22.25	22.25	22.5	22.5	25.75	25.75	22.75	25.75	29	29	29	31	30.25	25	24	22	22	25	28.25	25.75	27.75	25.25	25.25	23	25.25	27.75	27.75	28.75	28.5	27	23.25	24	22	23.25	21.75	22.75	21.25	21.25	19.5	19.75	19.75	20.25
32	47.25	47.25	49.75	63.75	61.25	46.25	46.5	46.5	42.5	40.25	40.25	39.5	45	45	55.25	51.25	52	44.75	45	45	46	45.25	61.5	62.75	56.75	42	42	42	43.25	48.75	47	50.75	46.75	41.25	36.25	38.25	34.5	34.5	35.5	38	38.5	40	44	50.5	54	221.25	576.5	814.5	876.5
96	94	102.25	102.5	91	85.25	86.75	82	81.75	86.25	112	115.5	115.5	114.5	83.75	76.25	69.5	69.5	67.5	71.5	70	81.75	72.75	69.25	62.75	65	65	65	65	63.75	67.5	62.75	64.75	66	64.75	64.75	64.75	63.25	59.75	58.75	54.5	50	53.5	54	51.75	53	57.5	56.5	55	62.25
107	91	108	108.5	91.25	79.75	85.25	77.75	77.75	81.25	81.25	85.5	83.5	80.25	77	82.5	73.75	73	68.75	68	65	59	60.5	60.5	61.25	61.25	62.25	59	59	59	70.5	69.25	91	86.25	76.25	65.5	70	61.25	67.5	62.75	56.25	57.25	83	73.75	73.75	70	49.25	49.25	48	49.25
255	239	216.75	193.25	179.25	169.5	167.5	166.75	150.5	169.25	177	158.5	147.25	153	144.75	144.75	143	137	124	128.5	120.75	129	129	135.75	134.75	134.75	143	131	125.25	127.5	130.25	125.5	130.25	126.25	125	127.75	127.5	121.25	121.25	114.5	112.5	106.75	106.75	104	110.5	110	113.75	113.75	113.75	134.25
85	74.5	71	67.25	67.25	114.25	222	267.25	267.25	264.5	255	231	237.5	265.25	261.75	228.5	224.25	202.5	197.25	197.5	213.5	314.5	331.25	331.25	326.25	254.25	254.25	254.25	237.25	234.25	234.25	224	217.25	220.75	214.25	226	231.5	233.75	223.25	233.75	233	245.5	259.5	267.5	268	281	268	271	281.75	284.25
284	284	828	1860.25	2244	2244	1942	1721.5	1566	1505.25	1505.25	1517.5	1532	1539.25	1524	1501.25	1479.75	1492.5	1418.75	1276.25	1097	1018.5	1018.5	1039.5	1044	1069.25	1128	1143.25	1155.75	1229	1229	1131	1120	1125	1125	1313.5	1521	1589.75	1617	1611.75	1628.5	1618.75	1640.5	1637.75	1636.25	1636.25	1623.75	1637	1635.75	1706
475	430.25	389.75	333.75	288	267.25	240	236.5	232.75	230.75	214.75	204.25	204.25	249	244.5	283.5	379	455	473.75	602.75	631.5	631.5	590.25	613.75	622	691.75	731.25	733.5	783	719.75	728.75	786	774.5	774.5	821.5	813.75	822.75	824.75	843.5	843.5	846.5	835	816	704.25	576.5	574.25	569.25	588	576.75	641
128	128	143.25	296	534.5	630.25	630.25	561	541	538.25	536	512.25	496	496	481.75	508.5	528.5	563	582.5	590.25	597.5	579.25	580.25	595.75	606	599.75	598.75	547.25	547.25	561.75	564.25	625.5	658	658	659.25	679.75	679	664.5	633.5	603.25	575.5	575.5	577.25	551.25	584.75	612.5	612.5	605.5	609.25	618.75
181	176.75	192	188.5	169.75	158.25	153.5	139	139	531.75	44475	134759	188236	194926	194926	189182	167849	151428	147461	146784	146784	139839	113036	78438	58527.2	48622	38888	33851	0.001	0.001	0.001	0.001	0.001	0.001	0.001	0.001	0.001	0.001	0.001	0.001	0.001	0.001	0.001	0.001	0.001	0.001	0.001	0.001	0.001	0.001
75	75	75.25	70.75	60.25	53.5	53.25	53.25	53.5	53.5	57	61.25	56.75	56.25	57.25	52.5	52.5	48.5	48.5	46	44.75	41.5	41	43.5	42.5	43.25	49.25	51	45.25	48	53.5	68.25	71.75	73.25	73.25	56	56	54	49.75	50.5	50.75	50	53.5	53.5	53.25	53.25	58	55.5	53.5	56.5
173	162.5	144	128.75	140.25	141.5	134.25	134.75	134.75	128.75	125.5	125.5	133.25	135.75	138.75	138.75	127.75	119	119.75	110	110	103	95.5	92.5	91.75	90.5	93	93	92.25	92.25	91.25	88.75	86.75	81.25	81.25	88.5	93	97	97	97	93.5	82.75	82	89.25	84	84	89.25	85.25	85.25	95
170	159.5	146.75	133.25	128.25	117.75	128.25	118.25	118.25	111	107	107	102	100	100	99	99	98	97.5	98.25	98.25	97.75	93.75	96.5	96.5	161.75	290	332.25	353	327.25	288.25	257	264.75	244	244	253.25	276	280.25	297.25	298	298	315.5	324	332.5	332.5	329.5	322.75	322.75	317.5	309.25
73	68.25	68.25	64.5	69.75	80.75	93	88.75	90.25	71.75	57.25	53	57.75	49.75	49.5	49.75	42.5	42.5	83.75	160.75	218.5	228.25	228.25	233	241.5	244.25	241.25	249.5	254.25	254.25	252.25	266.5	266.5	249	227	226	226	226.25	226.25	212.5	182.5	182.25	171.75	170.75	178.75	173.25	130.25	133	164	157.5
50	56.5	56.75	72	124.5	184.25	239.75	240.5	248.5	260.25	260.5	249.5	239.25	236.75	236.75	226	261	261	262.5	239.75	264	241.25	241.25	243.5	247.75	239.25	236.25	234.25	234.25	252.25	252.25	248.75	265.75	231.5	231.5	238.5	253	242.75	242.75	237.25	243	243.25	240.75	241.5	258.5	230.75	204.75	196.25	173	172.25
1387	1016.5	375	57.75	54.75	48.25	48	49.75	48.5	47	47	44.25	41	42.5	43.5	43.5	46	53.25	67.25	100.25	113.25	113.25	100.25	91	80.25	67.75	64	59	56	57	51.75	51.75	52.75	68.75	70.5	97.75	108.25	125.5	126.25	133.25	151	166.5	166.5	140.75	110.75	108.25	107.5	140.25	160.5	164.25
100	101.5	90.25	83.75	88	79.5	75.25	81.5	83	83	89	92.5	94.75	94.75	96.75	97.25	95.25	91.75	89.75	84.75	77.5	70.75	77.5	78	78.5	83.25	86.75	84.5	85.25	84.5	79.75	75.25	82	79	79.5	79.5	79	77.75	83.5	75.5	71.25	71.25	72.75	63.25	65.5	77.25	78.75	77.25	79	75.75
112	116.25	116.25	111.75	111.75	102.75	95.5	95.5	94.25	94.25	94	99	107.25	107.25	101.5	111.5	104.5	94.5	92.5	91.75	85.25	84	80.25	75.5	74.75	73.75	73.75	73.25	75.75	72.25	73.25	73.5	68.5	66.25	70	74.75	69	75	76.25	76.5	71.5	76	70.75	67.75	67.75	68.5	63.5	69.25	71.75	63.75
390	147.5	63.75	58.25	53.25	46.75	43	43	47.75	52.75	59.5	59.5	64.75	72.25	77.25	75	77	76.25	74	73.75	74	77.25	83.75	94.25	106.5	118.75	135	166.25	208.75	238.75	241.25	254.25	320.5	351.5	358.25	363	326.5	315.75	302.25	322	344.75	344.25	359.25	359.25	344.75	344.75	315	289.75	317.75	343.75
170	142.5	131	124.75	114.75	109.25	109.25	110	119	119	125.75	128.75	126.5	109.75	108	94	84.75	84.25	72.25	76.75	83	78.75	77.75	85	94	98	98.5	99	98.75	98.25	101.25	105.75	110	112.75	118	124.25	120	118	118	113.5	112.75	112.75	118.5	118.75	118.75	121.75	121.75	125.5	126.25	142.25
128	101.5	86.75	80.25	75.5	74	75.75	230.25	509.25	686.5	686.5	649.5	625.75	595.5	571	561.5	561.5	579.75	590	618.75	641.75	644.5	632.25	647.5	650	644	632.75	634.25	642.25	643.25	620.25	650	671.25	655.5	629.75	619	599	596.75	596.75	616.25	616.25	601.5	591.5	591.5	591.5	630	630	632.25	607.75	607.25
193	169.25	160.25	155.25	150.25	132	131.75	122.75	122.75	125.75	131	123.75	119.75	127.25	120.25	114	110.75	110.75	103.75	103	102.5	106	109	109	107.5	105.5	105.5	101.5	100.5	99.5	105.25	148.75	247.5	260.75	267	203.25	148.75	130.5	136.75	144.5	157	195.5	244.75	302.75	324.25	329	328.5	323.75	322.75	328
809	532.25	259.5	161.25	145.5	161.25	893.25	1834.5	2726	2899	2888.5	2771.25	2771.25	2598.25	2612.75	2565.25	2325	2445.5	2536	2313.5	1994	1994	1856.25	1727	1712.5	1563	1578	1512.75	1510.25	1510.25	1504	1468.25	1410.5	1313.25	1313.25	1235.5	1238.75	1244.5	1489.25	1683.75	1823.75	1824.75	2045	2354.75	2529.75	2529.75	2525.25	2506.25	2389.5	2194.25
149	132.75	131.75	114.25	93	98.5	97.5	81	81	85.75	85.25	76	74.5	81.75	78.75	76.25	75.75	82.25	77.25	79	75.5	78.75	74.75	76.75	80	82.75	82.25	82.25	81.5	81	79.25	77.25	83.25	83.75	76.5	74.25	65.25	59.75	59.75	64.75	64.75	67	67.25	70.25	69	70.5	72.25	70.75	68.5	73
132	114.5	108.25	98.75	93	78.25	67.75	64.75	64.75	64.75	65	65.5	63	64.75	64.75	57	53	52.75	52.75	57.5	57.5	57.25	52.25	54.5	51.75	47.75	47.75	53.75	53.75	53.75	54	54	48	48	45.75	41.5	48.75	59.25	54.75	56.25	56.25	56.25	51.5	45	44.75	48.25	48	49.5	52	51
299	293.25	292.5	284.25	261	219.5	204.75	204.75	217.25	223.75	230	230	228.75	225	215.5	204	209	195.75	190.5	190.5	205.75	196	196	183.25	173	166	167.25	164.5	157.75	158.75	171.75	158.25	168	168	169.75	158.5	150.25	160.75	192.5	180.25	191	191	177.75	177.75	166	156.75	154.5	149.75	149.75	142.75
453	450.5	439	409.75	364.75	344.5	344.5	358	381.75	402.25	407.75	400.75	404.5	413.75	399.5	385.25	385.25	362.75	346.75	346.75	355.25	347	362.5	355	338.5	333.75	337.75	323.5	338	324.25	316	315	315.5	315.5	315.5	333.5	333.5	364.75	359.75	372.5	371.25	381.75	371.25	386.75	381.25	349	302.75	298.75	298.75	303.75
37	43.5	43	46.25	46.25	40.75	38.75	34	32.75	34.75	34.75	30.75	34.25	38	43	44.75	51	49	51.25	48.75	51.25	49.75	48.75	44.5	46.75	46.75	50	57.25	57.25	57.25	52	52	50.5	53	59.5	81.25	74.25	75.5	75.5	58.5	57.25	55.75	54.25	55.5	51.25	50.5	56	53.25	54.75	54
64	54.75	54.75	64.25	60.5	57	58	42.5	38.75	38.25	34	33.75	34.5	38.5	37.25	37	37.5	42.25	36.5	40	44	40.5	36.25	42	37	33.5	33.5	33.25	33.25	36	36.25	36.25	38.5	41	41	43	43	41.75	42	38.25	38	40.75	40.75	40.75	43.25	41.25	40.75	41.25	41.25	37.5
52	32.25	28	22.25	24	24	22.5	17.5	16.5	16.5	17.75	20.75	20.75	19.75	16.75	14	11.5	13.75	15.25	14	15	15	13.25	13	12.25	11.75	11.5	11	10.75	10.25	8	6.5	6.25	5.75	7.75	12.25	18.5	21.75	21.75	22.5	22	20.75	21.25	23.75	27.25	27	30	29	28	22.25
10412	2685	102.75	93.25	83	74.5	71.75	68.5	68	68.5	71.25	69.75	69.75	71	66.5	61.25	63	57.5	51.5	49.25	48.75	43.5	44	44	43.75	39.75	43.5	40	35.5	32.25	28	25.25	27.25	26.5	25.75	28.5	30.75	31.5	34	36.5	39.5	39.5	40.75	39.25	36.5	35.75	35.75	35.75	35.75	36.25
73	75	74.25	69.5	63.5	58.75	58.75	61.25	61.25	64	67.5	71.5	70	70	60.25	51	51	48.25	54.75	54.75	60.5	61.25	87	107.5	117	117	102.75	97.25	94	90.75	90.75	98.5	113.5	132.25	134.5	140.25	137	125.25	109	92	92	88.5	87.75	91.5	88.25	86.75	85.5	91.5	90	93
81	76.25	66.75	63.5	54.25	54.25	54.25	52.75	48.5	45.25	86.5	47.75	66.5	63.25	62.25	48	53	45.25	53.25	53.25	53.25	46.75	56.75	51	51	42.75	39.75	35.5	34.25	36.5	37.25	43.5	44.75	44.75	41.25	40	38.75	38.75	37	37.75	36	37.75	37.75	42.5	44.25	44.75	44.75	46.25	46.25	46
64	60.75	57.75	54	54	54	53.25	51.75	48.25	41.5	35.75	41.25	41.25	36.5	44.75	47.25	49.25	43.75	43.75	46.5	53.5	44.25	44.25	43.75	37.25	37.25	36.75	43.5	48.75	50.75	50.75	53.25	48.5	52.25	51.75	46	46.5	52.75	51.75	53.5	57.5	56.75	51.75	51.5	50	50	46.75	53.25	56	59.75
278	289	293.5	299	315.25	336.25	357.25	357.25	345.25	350	321.5	321.5	334.5	334.5	317	325.5	318.25	313.25	313.25	310	310	304	306.25	502.5	890.25	1103.25	1160.5	1219.75	1296.5	1345.75	1380.75	1483.75	1483.75	1363.25	1290.75	1280	1243	1297.5	1330.25	1370.5	1351.5	1380.25	1423.75	1738.5	1723.25	1723.25	1647.5	1320	1283.25	1283.25
139	22575.8	31879.5	32768.5	31754.5	31457.8	28239.8	25630	24282.8	23961.2	23961.2	24382.5	24248.2	24065.5	24469.5	23892.5	23837	24074	24074	23997.2	24326.5	25100.2	27092	28286	28286	28490	28774	28475.8	27924.8	28544.8	28589	28736.8	29173.8	29327.5	29587.2	30254	30489	30489	30579.8	30215.2	29851.8	30021.5	30346	30355.5	30816.2	31085	31142	31383.8	31142	31247.2
22	22.25	26.75	28	28	43.5	60.75	86.25	86.25	68	62.75	67.5	63.75	65.75	63.5	71.75	298	601	820.5	828.5	724.5	668.5	636.75	625.25	625.25	693.25	773.25	814.75	814.75	814.75	845.25	844	853	908.25	844.75	810.25	848.25	844.75	850.25	850.25	855.75	864.75	902.5	909.75	924.75	984.75	981.75	1002.5	978.75	978.75
8	14.5	19	23.5	23.5	27.5	27.5	27.75	25.5	22.25	20.5	21.25	22.5	26	29.75	29.75	25	96.25	281.25	425	666	735.25	761.75	800.5	814.75	814.75	797.25	788.75	773.25	773.25	773.25	793.25	813.25	818.25	798	860	850	821.25	845.25	845.25	845.25	880.25	877.75	879.25	930.5	913	917	944.5	944.5	926.25
164	129.75	124.75	113.75	107.75	104.25	102.75	102	97	94.25	96	89.75	81.5	77.5	77.5	77.5	75.5	69	67.75	78.75	74.75	74	75.75	85.75	95.75	87.5	110.25	117.75	102.5	100.25	100.75	100.75	120	120	164	528.25	1108.25	1506.25	1506.25	1419.25	1415.5	1418.5	1366.75	1393.75	1373.5	1336.25	1328	1352.75	1347	1365.25
198	199	4831	13120.8	16719.2	16719.2	14935.5	13743.2	12946.5	12676.8	12519.2	12484	12645.5	12806.2	12912.8	13005.8	13026.5	13008.2	12976.2	12904.5	12955.5	12909.8	13065.8	13343.8	13627	13766.2	13853.8	13813.2	13971	14068.2	13924.8	13686.8	13585.2	13563.5	13563.5	13725.5	13689.2	13805	13602.5	13442.5	13442.5	13698.2	13702.2	13936.5	13979.2	13857.8	13695.2	13805.5	13805.5	13948.5
1179	532.5	300.75	300.75	278.75	269.75	225.75	250.25	250.25	238.5	251.25	257.75	249.75	245	247	240.75	238.5	237.5	245	242.25	242.25	233	214.5	195.5	183.75	180.5	183.75	182.25	179.25	185.25	188.25	182.5	172.75	172.5	171	160.25	146.5	144.5	141	141	141	146.75	150.25	145.5	139.75	147	143	142.25	147	147
83	83	71.75	60.75	54.75	48.25	47.5	42.75	46.75	48.75	45.25	73.5	106.75	131.75	254	6685.25	19593	25775.5	25775.5	25775.5	26598	27357	28413.5	28525.5	28715	28499.2	28348	27781.8	26853.8	25840.8	24670.8	23062.5	21814.5	21727.8	21474.2	21296.5	21550.2	21550.2	21263	20757	20069.2	19585.2	19216.8	18632.5	17981.2	17321.5	15713	13619.2	12675	12675
253	1675	3485.75	4250.5	4250.5	3868.25	3529.25	3335.5	3295.75	3295.75	3295.75	3288.25	3310	3213.75	3187.75	3187.75	3258	3238.25	3264.25	3297.5	3354.25	3297.5	3336.75	3350.5	3378.75	3285.25	3309	3261.75	3224.25	3224.25	3266.75	3271.25	5171.5	8789	10520	10520	10255.5	10013	9817.75	9787.75	9846.75	9745.25	9622.25	9490.75	9285.25	9198.75	9200.25	9278	19325.5	39570.2
110	110.25	108.75	109.75	109.75	106	101.75	95.5	91.75	93	89.25	123.25	198.75	196.5	128.75	128.75	102	100.75	97.75	102	101.5	78.5	62.75	91.5	64.75	67.75	76.25	76.25	71.25	71.25	73.25	58.5	64.5	77.25	75.75	162	162.25	148.25	40.5	46.25	41.5	41	45	52.5	52.5	57.25	59.25	61	61	58.75
74	74.5	69	65.75	64	62.75	62.75	65	70.25	70.75	76.5	80	74.5	79	87.25	82.25	83.25	93.75	93.75	95	97.5	119	161.25	216.75	297.25	506.75	506.75	457.5	452.5	452.5	521.5	521.5	520.25	495.25	257.5	233.25	260.5	270.75	312.5	331	331.25	325.75	314.5	296	295.5	278.75	295.5	314.75	309	306.5
57	55	55	55.25	57.75	57.75	65.25	57.25	53.25	49	52.5	52.5	52.5	60	62.75	59.5	57.25	59.5	58	57.25	62.75	90.75	88.75	125.5	125.5	119.5	75.25	148.75	57	53	60.5	60	51.25	47.75	51.5	51.5	57.5	57.75	59.25	57	56	53	56	52.75	51.25	52.75	56.25	54.5	59	63.5
140	124.25	112.75	100.25	87	87	77.5	77.5	72.25	71.25	71.25	71.25	72.75	72.75	71.25	68	65	61.5	61.75	77	116.75	153	153	132.5	139.5	142.25	138.75	138.75	140	146	146.5	137.75	137.25	154.75	165.5	141.5	141.5	135.5	122.5	102	91.75	91.75	89.75	89.75	95	104.25	125.75	148.5	172.25	185.75
54	48.5	43.25	38	36.75	33.75	35.75	33.25	34.25	34.75	41	38	47	47	44.25	33	31.5	30.75	32	32.75	38.25	37.75	37.25	33	36.5	30.5	30.5	32.5	30.5	30.5	30.5	30.25	31.25	29.5	26.75	26.5	27	27	27	26.5	29.25	30	27	27	27.5	25.25	23.75	22	20.25	20.25
116	113.25	110.75	108.75	108.75	105.75	103.25	96.25	97	91.5	91.75	86.5	84.5	82.25	82	80.75	80.75	76	76	70	77.75	73.75	81	81	87.25	86.25	134.25	138.5	227.25	630	1250.75	1472.5	1472.5	1316.75	1283.75	1242	1238.5	1300.75	1271	1293.25	1344.75	1399	1351.25	1298.25	1185.75	1140.25	1140.25	1147.75	1147.75	1097
181	134.75	109.5	99.5	98	98	117.5	586.75	638.25	653.5	653.5	229.25	229.25	213.25	204.75	214	225.75	225.75	225.75	210.75	242	192.5	162.5	164.75	190.75	190.75	212	211.5	216.25	333.25	383.75	645.5	762.75	762.75	700.5	570.75	333	231.25	231.25	777.25	1751.75	2205.25	2234.75	2234.75	2234.25	2314.75	2362.5	2447.75	2447.75	2447.75
881	793.5	657	657	2607.5	14159.2	40168.2	66508	66508	64538.8	41349.2	26070.8	24064.5	23641	23641	23589	23825.5	23947.8	23955	23865.2	23839.2	23598.5	23330.2	23056	22829	22988.5	22960.5	22960.5	23121.2	23439	23547	23986	24371.5	24275.5	24448	24622.5	24873	25066.2	25177	25426.8	25741.5	25935.2	26204	26666.5	27041.8	27284.8	27527.8	27798.5	28289	28608
1072	1150.25	1150.25	1377	1078.5	1283.5	1027.75	1988	2653	3062	2840.25	2840.25	2397	2397	2340.75	2354.75	2963.5	3594.5	3721	3721	3519.5	3242.5	3186.25	3042.75	3018.75	3136.5	3261.75	3409.75	3775	4009.5	4009.5	3752	3597	3463	3463	3464	3396.5	3531.75	3567.25	3567.25	3512.75	3684.5	3787	4021	4019	4153.5	4153.5	4006.25	3899.75	3755.75
171	153.75	129.5	131.5	174.75	338.5	341.5	349	242	197.25	123.25	168	249.5	293.25	225.25	230	160.75	109.5	109.5	304.25	390.75	384.5	400.75	428	191	132.75	152.5	232.25	127.5	226.25	362.25	341.5	164	172	91.75	91.75	113	157	203.5	242.25	319	306.75	456	565.25	549.25	467	467	460	368.75	409
163	148.5	136.25	124.5	121.75	121.75	121.75	121	120.75	117	108.75	107.5	107.75	107.75	102.25	102.25	92	94	91.5	99	112.25	118.75	119.25	127.25	120.25	137.5	131.25	123.5	93	86.75	83.25	83.25	78.75	86.75	118.25	115.25	186.25	302.75	382.25	360.25	398	249.25	125.5	125.5	202.75	123.75	133.75	144.5	101.5	94.25
8647	8527.5	7858	6856.75	6018.75	5641	5405	5083	4931	4931	4929.25	5066.75	5352	5454.75	5488.75	5732.25	6159.5	6769	6781.75	6894	6706.25	6706.25	6734.5	7160.75	7597.25	8050	9229	11136.5	12107.8	12107.8	12266.8	12597.2	12503.2	12451	12855.2	13034.5	12993.2	13042.5	13964.8	16184.8	18447.8	18679.8	17528.2	17829.2	18134.2	18134.2	18281.8	19564.2	20180.5	20252.8
115	97.75	74.75	58.5	53	47.75	44.25	44.25	50	46	47.5	59.75	46.5	39	45.75	44.75	43.5	38.5	40	35.75	35.25	35.25	37	35	41	53.5	68.25	67.25	67.25	57.75	37.75	37.75	40.75	76.25	138.75	280.75	222	222	213	180	104.75	104.75	175.25	173.75	137.75	169.5	67.25	67.25	236.75	312.75
2541	2750.75	2939.25	2964.5	3003.75	2831	2807.5	2794	2844.75	2919.75	2919.75	2901	2913.25	2982	3014.5	3168.75	3384.75	3384.75	3143	3071	2893.25	2855	2855	2855.75	2876.75	2874.5	2822.75	3119.5	3718.5	3772.25	4123.5	4123.5	4022.75	3876.75	3628.5	3441.25	3381.5	3424.25	3167.75	3493.75	3352.25	3352.25	3104.75	3051.25	3051.25	3081.25	3260.75	3472	3473	3473
217	217	176.25	261.25	226	221	106.75	104.75	91.75	100.25	89.5	88.75	95.5	95.5	81.75	73.25	73.5	68.75	79.5	91	91	83.5	81.5	79.5	79.5	81	80.5	77.5	79.75	75.5	71.25	79.25	87.5	81	82.5	100	94.75	99	106.75	101.5	69.25	94.75	82.5	90.75	102.75	143.25	125.5	121.75	75.75	67.25
203	160.25	143.75	136.5	127.75	121.25	117	115.25	117	115.75	119	128.5	398	720	986	1148.75	1135.5	1175	1193.5	1197.5	1113.5	1105.5	1062	1018.5	1000.5	986.5	986.5	1038.5	1152	1299.75	1303	1303	1303	1305	1334.25	1555.5	1645.75	1659.5	1694.25	1656.75	1656.75	1705.75	1753.5	1753.5	1846.25	1824.25	1842.25	1783.25	1825.25	1691.75
103	99.5	106.5	95	83	73.5	84.25	93.75	129	150.5	150.5	164.5	158.25	130.25	130.25	147.5	147.5	155.25	167.5	167.5	196	222.75	210.75	204.25	204.25	179.25	174.5	174.5	178	189.25	198.75	203.75	205.75	208	219.25	245.75	338.25	487.75	556.75	582.5	629.25	629	511.75	343.75	308.25	203	235.75	236	377.5	358
237	185.75	185.75	144.25	125.25	111	225.5	111	111	106	165.75	100	115	112.25	95.5	78.25	75.75	70.5	76.25	84.25	84.25	84.25	82.5	71	89.5	284.75	280.25	328.25	377.25	200.5	200.5	209.5	222.5	218	188.5	166.25	158	158	158	166	177	192.25	177.5	217.5	219.5	257.5	222	253	284.25	393.5
129	109.25	97.5	87.25	75.25	72.75	78	72.25	77.75	76.25	152.5	155.5	155.5	239	614.5	787.25	1052.75	1060.5	1033.5	1050.25	1025	1039	1039	966	923.75	866.5	834	867	946	900.5	1031	1120.5	1061.75	915.75	1067.25	925.25	861.25	887.5	887.5	883.25	888.5	865.25	865.25	875	889.25	861.25	966	939.25	1044.75	1252.25
163	147.5	132.25	119	119	112.25	120.5	118.75	114	103.75	101	101	101.5	209.75	207.75	213.75	101.25	100.5	92	81	70	68.75	68.75	69.75	68.5	74	72.25	68.25	69.5	69.5	63.25	63.5	87.25	96.75	215.25	314.25	174	301.25	570.75	744.25	898.25	911.25	889.75	889.75	889.75	901.25	922.25	946	916.25	970
163	134	162.5	221.75	178.75	180.25	179.75	104.5	83	104.5	86.75	77	94	108	108	167.25	167.25	135.75	121.25	69	59	59.25	59.25	59.25	107.75	229.75	232.75	232.75	157.75	82.25	78	72.25	80.75	105.75	99.75	98.75	98.75	98.75	80.25	78.25	77.75	84.25	74.5	65	69.75	69.75	68.25	83.5	107	245
18	60.5	74.25	74.25	52.75	34.5	33.25	33.25	29.25	30	35	32	29.5	28.5	33.75	29	35.75	27.25	28.25	16.25	16.25	14.25	16	14.5	15	19.75	24.25	25	70.75	25	23.75	27.75	31.25	28	28	34.25	27.75	23.25	20.5	24	22	24.75	59.75	132.75	169	169	137	114.5	111.75	70.25
47	51	99.75	241.5	341.75	409.75	337.25	371.25	369.75	405	364	388	412.75	551	848	1028.5	1028.5	1028.5	1157.75	1479	1697.75	1708	1914	1716.75	1531.25	1497	1524	1472	1438	1502	1548.5	1463.75	1606.5	1721	1810.75	1993.25	2180.25	2360.75	2464	2506.25	2506.25	2379.25	2263.75	2263.75	2325.25	2636.25	3214	3873.75	4216.5	4216.5
77	77	64.75	91.25	80.5	40.25	49.25	99	46.5	55.25	53	35.5	32.25	35	35	35	34.75	31.5	31	27.25	31.25	27.5	28	29	28	28	28	72.25	181.5	183	146.25	221.75	294.25	380.25	606.5	743.5	825.75	825.75	819	813	907.75	776.75	637.25	413.5	300.25	248	273	232.25	232.25	301.25
219	221	322.5	583.25	782.75	810.5	773	1002.25	1002.25	1365.5	1444.25	1446.75	1239.25	1159.25	1122.75	1165.5	1208.5	1286	1363	1379.5	1314	1483.25	1459	1675	1657.5	1722.25	1424.25	1485.25	1248	1488	1347.5	1687.5	1700	1810.5	1577.25	1576.5	1361.75	1361.75	1395.25	1405	1489.5	1730	3322.75	7340.25	7681.25	7681.25	3993.25	2332.5	2332.5	2005.25
107	113.25	101.5	90.75	89.5	88.75	76.5	69	69.5	76.25	66.25	115.75	114.5	213	122.5	122.5	75.25	168.5	71	84.25	91.75	127	82.25	103.25	114	123.25	177.5	177.5	165	252.25	236.75	62.75	76.5	214.25	159	337.25	337.25	406	406	477	357.75	575.75	828.75	753.75	448.75	486.5	320	274	320	425.75
84	61.25	61.25	49	49	52.5	55	57.25	58.5	51	51	86	87.25	144.75	144.75	75.5	40.25	40.75	40.75	61	61	63	58	39.5	35.5	39.5	32.75	34.75	43.25	54.5	46.5	46.5	40	40	53.75	97.5	129.5	165.75	165.75	144.5	91.5	119	129.5	214.75	214.75	302.5	328.75	300.75	259.25	757.25
191	256	325.25	325.25	295.75	152.5	87	87	113.25	105.5	97	103	80.75	80.75	83	119.75	117	178.75	113.75	220.75	234.5	265.25	209	209	97.5	64.25	62.25	62.25	62.25	64.5	67	71	73.75	73.75	122	241.75	247.5	332.25	379.5	266.75	169.75	269.5	269.5	427	470.25	524	933	998.5	547.5	596.5
61	61	57.75	50.25	60	50.25	56.75	162	233.75	92.5	92.5	88.75	54.75	50.75	42.75	48	50.25	44.5	39	42.75	42.5	38.5	42.5	41.25	47	44.5	82	158.5	525	158.5	162	107.25	41.5	35.75	39.5	36.25	40.5	40.5	53.25	42	45	47.75	47.75	47.75	46.75	63.25	285.5	308.25	289.5	608.25
240	228	206.25	207.25	308.25	533.25	636.25	636.25	603	568.5	487.25	366	322	322	465.75	733.25	733.25	714.25	402	246.75	210.25	200	183.75	206.5	206.5	276	387.25	475	486	522.25	561	579.5	579.25	591.5	569.75	569.75	580.5	572.75	530.5	525.5	525.5	477.5	465.75	419.25	517.5	626.5	712.5	783.5	783.5	655.75
70	72.25	59.25	58.75	58.75	58.75	67.75	93.25	96.25	150	120	116.5	71	62.5	54.75	54.75	51.75	58.75	61	163.5	192	195	82.25	82.75	66.75	66.75	71.75	74	74	72	67.5	67	67.5	67.5	74.25	77.25	77.25	71.5	75.5	71.5	68.5	66.75	62.25	62.25	62	70.75	70.75	71.5	63.5	67.5
170	145	125.5	113.5	107.5	99.75	99.75	88	82	81	78.25	78.25	79	78.5	87.75	149.25	178.5	186.25	199.5	155.25	144.25	144	151.75	138.5	124	141	121	114.75	109	99.5	99	116	119.25	130.75	130.75	137.75	130.5	129	132.75	134.5	132.75	138.25	149.25	192.25	192.25	234	179.75	175.75	175.75	193.5
412	412	404.25	379.75	384.75	360	360	341.5	279.5	203	150	128.5	128.5	129.75	130.5	121.25	133.5	133.5	144.25	136.5	139.25	152.25	152.25	158.5	158.5	181.25	181.5	171	151.5	171	162	171.5	157	158	141.5	120	120	220	408.25	532.75	543.75	563	568.75	583	548	526.5	493.75	491	491	583.75
170	165.5	150	136.75	144.25	134.5	126	182	180.5	123	130.25	118.25	111.5	106.25	102.75	101	99.5	92.75	98	114	126	126.5	139.25	125.5	110.25	113.5	140.25	120.25	113.75	168	123.75	123.75	123.25	184.25	177	177	126.25	125.75	95	85.75	94	97.75	111.5	133	162	163	154	171.25	176.5	197.25
98	85.75	71.5	61.25	54	53.5	46.75	47	43.5	40.25	32.75	37.75	30.25	30.75	35.5	45.5	39.25	44	34.5	30.5	30.5	35.5	51.5	51	50.75	50.75	101	60.25	69	77.25	39	28.5	28.25	30.25	71.75	69.75	261.5	267.5	83.25	34.5	120.75	94.75	107.75	182	182	139.75	124.25	114.25	58	63.25
100	88.5	88.25	77.25	77.25	77.25	86.25	83.75	82	106.5	100	76.25	92.75	130.5	92.75	130.5	230	365	465.25	545.25	569.75	569.75	540	554.5	463.25	458	511.25	511.25	425.25	477.75	500.5	448.5	477.5	477.5	416	416	432.75	481.5	502.25	502.25	508.5	508.5	517.5	539.75	539.75	545.25	557	558.5	537.75	558.5
83	80.25	72	60.5	50.75	47.5	47.5	46	81	180.5	310	382	382	267.5	214.5	100.5	64.75	62.25	56	49.25	46	50.75	48.75	48.75	50.5	51.75	51.75	55.5	55.5	54.5	52	46.25	46.25	73.25	75.25	78	102.75	79.5	79.5	83.25	103	91	85	85	94	159	208	220.25	135	131
536	540.75	537	453.75	489.5	611.75	921.5	1105.5	1120.75	1175	1321.5	1263	1425	1586	1643.75	1747.75	1747.75	1678	1675.75	1555	1219.5	1112.5	1312.25	988.75	992.25	1088.25	1026.75	1026.75	1103.5	1213.25	1308.5	1359.25	1359.25	1337	1417.25	1320	1228.75	1284.5	1217.25	1217.25	1271.5	1380.5	1344	1378.75	1299.25	1238	1199	1151	1151	1164.75
98	117.75	149.25	211.5	273.5	289.25	420.5	420.5	408.5	258.75	280.25	226.5	229	212.25	212.25	211.75	205.25	206.25	502.75	849	1006	1302.5	1301.5	1391	1657.5	1680	1688	1688	1690	1691.25	1813.5	1792.25	1800.75	1704	1661.75	1661.75	1753.25	1776	1776	1729.25	1704.75	1663.75	1616.75	1630	1693.75	1659.25	1680.25	1722	1799.75	1848.75
213	176.25	160	149.25	136.75	130.75	130.75	131.25	135.75	135.75	130.5	118	122.25	114	119.25	120.75	120.75	120.75	144	135.75	126.75	126.25	126.25	90.75	98	90	113.25	87.5	96.75	86	86	84.75	90.5	83.25	84	92.5	92	92	98.75	102.25	99.5	102.5	99.5	98.5	92.5	96	94.25	94.25	89.75	93
51	55.75	55.75	59.75	54	46.75	82.25	683.25	373.25	642	654	654	320.25	160.25	120.5	92.25	108.75	79.75	79.75	53	55	34.5	34	34	34	31.5	72.75	176	70.75	68.25	79.75	149	219.25	242.5	242.5	442	442	433.75	473	473	659.25	358.25	292.25	572.5	1063.75	1364.25	1364.25	1562.5	1529.75	1280
231	225	225	183	183	233.5	157.5	133.25	233.75	200.25	167.25	235.75	235.75	172	192	237	172.25	177	186.5	155	142.5	143.25	143.25	145.75	214.75	253.5	389.25	424.5	377.25	283.75	335.5	335.5	276.75	373	485	519	454.25	477.25	490	520.75	484	705.25	766.5	782	711.25	711.25	711.25	954	1176.5	1241.25
82	69.5	59.25	55	53.5	53	47	45	36	37.75	37.75	36.25	53.5	98.5	189.75	271.75	372.25	412.25	386.75	327.25	322	283	274.25	285.5	275	288.25	318.75	317	361.25	462.75	452	427.75	519.5	624	553	758.25	993.25	911.25	601.25	619	524	524	524	646.5	672.25	714.25	636.25	641.5	641.5	796.75
112	95.25	95.25	97.5	83	73.25	64.75	76.75	62.5	61	61	60.25	60.25	55	53.75	56	59.5	54	59.75	56.75	49.5	45	45.5	41.5	45.5	48.5	52.5	59.5	144.5	144.5	216	318	318	325.5	207.25	292.25	156.75	157.25	179	821	676.5	691	691	372	146.5	181.25	186.75	170	170	170
404	257.75	154.25	120.5	107.5	120.5	217.75	502.5	775.5	907.25	907.25	860.25	983	1306.5	2819.5	5612.5	6355.25	6414.25	5001.5	4412	4077.5	3893.5	3867.25	3867.25	4380.25	5083.25	5786.75	6306.75	6839.25	7188.5	7430.5	7466.75	7267.75	7253.75	7269.75	7269.75	7363.5	7400	7400	7341.5	6684.5	5662.75	5643	5279.5	5695	6403	6528.25	6528.25	6528.25	5879.25
776	446.5	305.75	269.5	252	250.25	242	231.25	219.5	214	214	214	192.5	182	166.25	154.25	153	154	154	227.5	225.5	232.5	427.75	231.25	174.25	175.75	165.5	145.5	153.25	148	151	162.5	185.5	269	269	245.75	235.25	331	243.25	258	201	215.25	195.75	195.75	182.25	220.5	399.25	488.75	488.75	507.25
307	185.25	306	505	330.5	392	455.75	232	232	225	117.75	63.75	55.75	55.75	97.75	97.75	74.25	72	38	38	36.25	37	83.25	113.25	55.5	81	135.75	101	91.25	142.25	137	169.25	338	509.5	424	514.75	356.5	339	161.25	258.5	132.5	107	97.5	124.5	124.5	193.5	217.5	182	179.25	177.5
1168	1168	2402.5	2765.75	2917.75	2923	1859	1859	1846	1928.5	1898.75	1922.5	1809.5	1750.25	1707.5	1662.25	1645.5	1596.25	1524.25	1461	1501.5	1814	2216	2216	2240	1915.5	1594.75	1529.75	1529.75	1378	1310	1347.25	1347.25	1451.25	1649.25	2013.5	2009	1871.25	1851	1584.25	1484	1621.5	1788.5	1788.5	1617	1223.5	809.25	671.5	745.5	652.75
1244	786.25	510.25	510.25	272.75	262	142.75	60.5	60.5	119.25	211.25	349.5	408.25	328.75	408.25	376.25	319.5	237.75	309.25	299	277	246.25	297.75	363.5	569.75	569.75	582	331	284	284	424.5	575.75	575.75	530	283.75	113.25	113.25	86.5	69	122.75	178.75	135.25	113.25	195.5	279.75	279.75	295.5	414.5	398.5	321.75
445	542	598	598	528.5	499	385.25	217.75	218.25	158	198	291	385.5	317.5	342.75	394.5	394.5	461.5	537	537	549	472	416.75	403.25	424.25	385.25	399.25	372	290	278.5	343.25	313.75	379.75	379.75	352	314	392.5	276.25	351	526.5	854.5	775	1095	1168	1157.25	1038.25	1038.25	923.5	970.5	842.25
101	82.75	76.25	65	65	61.5	61.5	59.5	58	55	52.5	54.75	53.5	54.25	52	53.25	53.25	55	68.5	68.5	75	75	112.5	204.75	207.75	356.5	386	299.5	326.75	511.5	886.5	863.75	1416	1240.25	525.75	103.5	185.75	103.5	184	106	169	181.75	187.25	119	171.5	136	136	136	232	301.5
211	200	200	178.25	158.25	139.75	122.5	106.5	99	98.5	89.25	77.5	72.75	72.75	80.75	241.25	254	254	436.75	193.25	87.75	77.5	74.5	74.5	102.5	196.75	457.5	934	1452	1452	1540.75	1260.5	1133	1074	1173.5	1156.5	1408.5	1957.75	2132.75	2041.5	2327.25	2057.75	2057.75	2300.75	2474.5	2635.25	2944.5	2944.5	3437.25	3129.25
94	93	93	82.75	84.5	81.75	80	76	77.5	85	96.5	108.5	106.5	111.75	104.75	99	96	103	105.75	109	105.75	125.5	132.25	143.5	136.25	136.25	123	122.5	127.75	118.75	118.75	118.75	133.5	112.25	118.5	118.5	139	113.5	128.5	110.75	112.25	110.25	104.75	104.75	117.25	115.25	123.5	126.25	118.25	118.25
213	208.5	194.25	202.5	209.75	217.25	201	195.5	191.25	197	275.75	342.5	342.5	342.75	222.25	222.25	214.25	214.25	200.5	192.5	192.5	459	537	653.5	1111.5	683	640	1015	1074.5	769.5	769.5	612.5	587	523.25	496	453.5	453.75	369	419	416.5	427.25	386	491.5	584.25	742.75	798.75	1002	1049.75	1451.75	2367.25
79	77.75	72.25	61.5	62	61	57	69.75	73	76	86.25	86.25	123.75	121.5	114	62	62.25	55.5	62.25	53.25	46.5	44.5	41	41	41.5	49.75	74.5	74.5	122.25	264.75	557.25	520	518.5	173.25	38.75	35.5	39.5	39.5	39.5	47	51.25	52	52	45	45	44	44	44.75	44.75	44.75
49	49	50.5	46.25	49	48.25	35.5	36.5	43	43	45.5	49.25	53.75	54.25	62.5	62.5	47.75	45.75	36.75	28	30.5	27	27	31	38	39.75	46.75	42.75	42.75	43	43	35.75	37.25	58.25	94.75	129	129	113	71.5	44	34.25	35.75	47	50.75	68.25	68.25	66.75	52.5	52.5	91.75
99	89	88.75	88.75	95	102.5	105.5	109.75	109.75	111.5	111.5	107.75	94.75	94.75	81.25	81.25	133.5	156.5	87.5	94.25	94.25	69	44.5	46	48	78.75	98.75	98.75	93	86.25	72.5	66.75	66.75	63.75	65.25	66.75	65.5	65.5	70.5	83.75	100.75	100.75	130.5	131.25	102	100.75	113.5	104.5	113.5	111.75
118	118	150.75	192.75	241.75	236.5	249.25	249.25	249.25	238	215.75	186	186	237	362.5	664.25	1039.75	1134.75	1134.75	1001	825	702.75	702.75	734.5	854.25	909	954	954	962.5	982	1012.75	1018.75	994	998.25	1063	1137	1222.5	1222.5	1138.5	1034.5	1034	1020.5	1101	1178.25	1186.75	1171.25	1236.75	1213.5	1228.5	1301.25
101	98.5	98.25	96.75	90.5	78.25	73.5	73	73	79.75	79.75	76.5	71.25	71.25	63.25	61	61	89.25	61	64.75	61.75	65.5	54.75	65.25	55	56.75	48.5	51	51	55.5	57.5	61.5	61.25	67	109.25	67	65.5	73	67	63	68.5	77	70	70	70	109.25	69.25	91.75	92.75	92.75
70	66	60	51.5	49	45.25	39.5	39	34.5	34.5	28.5	34.5	36.5	35.75	35	35.25	35.25	34.25	40	35.5	35.5	31.25	33.75	31.75	34	44.5	62.75	62.75	91	91	84.75	60.75	82.5	100.5	228	302.25	302.25	276.25	314	281.5	331	577.5	775	845	845	756	725.25	575.5	488.5	471.25
46	46	52.25	48.5	37	30.25	30.5	28	30.5	28.5	31.5	27.75	27.75	23.5	25.5	21.75	20.25	20.25	23.5	22.5	23	26.75	27.5	27.25	25.25	53	26.75	29.75	28.25	28.25	27.25	29.5	27.5	28.75	44.5	49.75	35	35	33.75	33.75	38.5	55.5	106.25	106.25	125.75	113	50	28.25	50	37.75
65	63	60	56.5	53.25	52.25	50.5	48.5	44	48	43	47	47	47	47.75	51.25	47.25	47	47	40.25	35.25	35.25	31.5	35.75	46.25	46.75	37.75	42.25	34.5	34.5	37	41.75	43	43	42.75	41.5	39.75	39.75	36	44.75	61	82.25	82.25	97.75	109.25	119.25	134.5	136.5	136.5	149.75
124	4721.75	5943.25	5943.25	5234.75	4914.25	4776.5	4485.5	4455	4310	4021.75	4090	4090	3951.75	3893.25	3899.5	3793.75	3680.25	3638.75	3701.25	3628.5	3511.75	3611	3615.5	3679.75	3756	3756	3680.5	3651	3643.25	3645	3730.5	3723.25	3598.5	3599.5	3695.75	3657	3699.25	3699.25	3683.5	3683.5	3628.25	3672.75	3705.5	3698.5	3684.5	3684.5	3684.5	3708.5	3759.5
312	288.25	255.5	210	176.25	128.25	128.25	228.25	267.25	475.5	481.25	301.5	201.75	196	164	164	128.25	144.75	146	143	111.25	137.5	147	151.25	147.75	199	178.75	157.75	145.5	169.5	169.5	190.75	200.25	190.75	238	331	333.5	237.25	264	208.75	208.75	206.25	236	229.75	204	146.75	135	119.5	135	149
189	97.75	64.25	60.5	60.5	63	61.5	64.25	65	63.25	65	65	65	63	61.25	57.25	60.25	63	63	63	66	56.25	56.25	63	63.5	70.5	103.75	71.5	60.5	63	80.5	61	74.25	76.5	103.5	79.5	79	69.25	93.5	67.25	113.25	216.25	216.25	241.25	244	150.25	67.5	74	68.5	65.75
118	113.25	113.25	102.5	120.25	134	128.5	109.75	118.25	118.25	112	112	113	118.75	112.75	108.25	107.5	109	97	97	474	1171	1433.75	1457.5	1293	1143.5	862	469.25	262	262	285.25	329.75	348.5	373.25	373.25	356.5	356.5	377.25	389.75	371.25	381.25	411.25	386.75	346.25	306	277.75	277.75	304.5	499.5	850.5
155	131.25	112.75	99.5	92.75	88	88	81.5	69	90.75	83.75	60.5	64	63	54.75	63	494	1395.5	1896	1994	1994	2076.5	2076.5	2144.75	2061	2056.25	2029.25	2015.5	2015.5	2122	2258	2379.75	2413.5	2413.5	2353.25	2208.75	2086.75	2022.25	2004	1956	1927.25	1933.5	2046.25	2046.25	2062	2062	1990.5	1946	1946	1930.75
109	89.25	89.25	84	88.25	88.25	82.5	82.5	159.75	145.75	144.5	238	204	115	208.5	208.5	113.75	73.25	57.75	45.5	44.75	48	48	52.5	56.5	60	60	63.75	60.5	56.5	56.5	79.75	83.75	84.25	84.25	61	61	52.25	51.5	47.75	90.5	179	232	255.75	406.75	280.75	280.75	279.25	272.25	140.25
137	160.5	160.5	289	367	252	236.25	327.5	327.5	355	434	434	372	203.25	139.5	102.75	134.25	173.25	369	342	342	436	386.5	167	356.75	575.5	577.75	549.5	708	660.5	471	427	269	269	198.5	208.75	252.75	523.75	253.25	253.25	423.75	339.75	225.25	220.75	253.75	214.25	253.75	222.25	261.75	223.75
1863	1233.75	1068	1026.25	1088.5	1136.75	1196.25	1143.75	1136	1145	1066.5	1096.75	1113.75	1143.75	1141.25	1309.75	1309.75	1367.75	1367.75	1278	1194.75	1187.5	1127	1079.25	1189.5	1212.5	1207	1229.5	1257.25	1229.5	1266.5	1291.5	1351.75	1334	1334	1340.5	1248	1130.75	981.5	1087	1083.5	1147.25	1122.75	1207.5	1223	1324	1307.5	1393.5	1336.25	1415.5
75	58.5	90.5	79.25	50	45.5	41	36.5	34.5	27.75	28.25	28.25	31.25	26.75	27.75	27.75	27.75	28	48.75	76.75	76.75	77	45.25	45.25	31.75	55.25	79.25	79.25	45.75	45	45	30.75	28.75	68.25	70.25	27.75	23.5	21.5	18	18	22.5	49.75	58.5	96.5	106.25	80.5	66.25	80.75	80.75	99
175	158.5	163.75	136.25	118.25	116	123.25	114.25	109.5	98.75	91.75	91.5	102.25	103.25	103.25	104.25	103.75	105	110.75	110.75	105.75	91.75	77	77	79	80	80	75.75	75.75	67.75	67.75	73.5	81.75	81.25	90.5	89.75	97.75	92.5	87.25	99.75	103.5	85.25	101.25	101.25	83.75	106.25	102.75	67.5	102.75	95.75
95	85.25	85.25	81.25	92.25	89.75	84.75	65.5	69.5	59.75	67.75	87.5	87.5	71	105.25	70	50.25	57.75	54.75	54.75	52.5	55.25	52.75	52	47.25	52	55	122.25	274.75	316.75	324.25	270.75	291.75	267	294.5	352.25	391.75	345.5	391.5	402.5	389.25	407.75	407.75	379.5	399	426.25	415.75	454.75	454.75	524
64	64	64	103.25	94.75	101	55.75	55.75	48.75	43.75	43.75	48.25	47.75	45.25	45.25	66.75	40.5	40.5	45.75	60.25	45.75	60	59.5	55	40.5	57	57	84.5	114.75	114.75	126.75	117.5	100.75	73.25	86.5	64.5	55.25	66.75	70.75	82	90	108.75	87.75	107	87.75	106.25	86.75	136	110.25	160.5
115	99.25	99.25	91.25	84.25	77.5	77.5	78	73.75	78.75	78.25	78.25	70.25	72.75	67	68.25	65.25	63.5	59.25	59.25	59.25	56.75	55.75	54.5	63.25	54.25	59.5	51	53.5	53.5	56.25	51.5	68	100.75	97	97	120.75	111.75	86.5	80.75	147	121.5	121.5	198.75	191.75	97.5	60.5	74.5	74.5	134
218	194	194	159.25	154	175.75	209.5	209.5	225.25	254.75	287.25	339.75	339.25	386.25	429.25	491	642.5	706.5	706.5	672.25	627.5	627.5	626	670.75	704	742.5	742.5	756.75	760	766	776.5	761.25	773.25	802.25	800.75	863	863	878	878	997.25	844.5	919.25	930.25	850.5	850.5	1048.5	1178	1237.75	1237.75	1086.75
121	107	91.25	74.25	57	57	53.5	65.5	67	67	71.25	69.75	62.5	61.75	75.5	69.25	78	90.25	102	103.75	110	126.25	126	124	116.5	98.5	98.5	100.75	132.25	133	198	300.25	402.75	473.5	473.5	531.5	525.5	558.5	521.25	564.25	564.25	636.75	712.5	733.25	756.25	756.25	763.75	757	736.75	668.25
242	203.75	183	166.5	162.75	173.25	156	156	149	134.75	125.25	125.25	130.5	145.5	153	153	155.75	142.25	135.75	137	129.25	134.25	127.5	118	103.5	103.5	99.75	98.75	98.75	96	96.5	110.25	107	101	117.75	96.25	93.75	107.25	135	361	585.5	761.75	779.5	671.5	601.25	551.25	471.25	428	428	422.5
96	96	79.5	72	66.5	65	59.75	60.25	57.75	48.75	43.5	49	49	49	54	63.25	59	51	55.5	53.25	53.25	48.75	43.75	41.25	48.25	40.5	48.25	54	50	51	58.75	58.25	58.25	63.5	67.25	66.75	72	82	96.25	80.5	76.75	87.5	66.5	58.75	93.5	98.5	89.25	95.75	94.25	72.75
140	131.5	123	108.5	92.5	88.5	88.5	84.25	92.75	90.5	80	71	68	67	66.75	65.75	66.75	66.75	65.75	62.5	59.5	77.75	69.75	73.5	73.5	76	75.5	75.5	72.25	124.5	121.5	95	70.25	110	70.75	70.25	110	123.75	77.75	78.25	101.5	70	60.5	60.5	66.5	62.75	66.5	133	215.75	263.25
111	87.25	88.75	79	79	86	100.75	119.75	122.75	129.5	133.25	150.5	174.5	184.25	189.25	189.25	187.75	197	211.25	214	206	206	196.25	196.25	180	180.5	200.5	203.75	208.25	211.5	237	310.25	459.25	560.25	560.25	523.25	490.5	463	456.75	456.75	440	473.75	590.75	700.5	734	734	709.75	703	691.25	635.25
199	182.75	164	139.5	126.25	121.5	111.25	110	107.25	113.25	109	110	104.25	106.75	99	103	99	96	89	90.5	90.5	96.5	111.75	118.25	118.25	107	104.75	93.5	82	79.5	79.5	82.5	85.25	89	93.75	92.5	100.25	99.25	90	106.25	108.25	91.5	105.5	105.5	91.25	87.5	80.25	80.25	75.25	89.5
178	163.25	133.5	112	111	102.25	101.25	95.75	93.25	93.25	84.25	83.75	87.25	94.25	87.25	89.25	83.25	85.5	80.5	79	78.5	105.5	78.5	81.5	110.75	137.25	108	108	124	101.75	89.25	81	83.5	78.5	78.5	75.25	69.25	69.25	74	68.5	68.75	77	74.5	73.25	80.25	80.25	77.5	74.75	67.25	67.25
116	97	78	61.75	66.5	83.75	146.75	180	180	152	152	82.5	48.5	45.75	44.5	40	39.75	39	37	38.5	42	42	39.25	42.5	44.5	42	42	45	45.5	55	84.75	97.25	133.5	166.75	157.25	215.5	215.5	203.5	179.75	205.25	203.75	214	214	215	219.25	222.25	221.25	230.5	227.5	211
90	77.75	77.75	71.25	74.5	75.75	77.5	74	77.5	78.5	110.75	111.75	112	80.25	106	77.25	65.25	73.25	62.5	46.25	48	52.5	49.5	54.5	56	56	54	53.75	53.75	53.25	53.25	55.75	60.25	95.5	102.25	102.25	99	58.75	58.75	54.25	53.25	54.5	54.25	51	51.75	51.75	46.25	45.25	47.25	47.5
127	127	118.25	96	89.75	92.5	85	75.75	69.75	69.75	60.5	62.75	67.25	108	77	122.25	131.5	148.25	113.5	162	149.75	213	243.25	264.75	279	362	507.25	614.5	665.25	720.75	770	833.5	833.5	781.75	712.5	742	715.75	705.25	705.25	692.25	634.25	634.25	620.25	626.5	650.5	690	667.5	668.25	684.75	673.25
355	125.75	44.75	44.75	44.75	42	41	43	37	37	37.5	39.25	41.25	61.75	97	97	56.25	56.25	60	32.5	35.5	35.5	53.25	29.5	52.25	53.25	55	42.5	42.5	38	35.5	36.5	32	33	33	47	94.75	94.75	95.75	71	35.5	35.5	35	49.5	60.5	91.75	71	72	55.25	49.75
520	318.5	268	185.75	141	130	121.5	121.5	131.5	119	119	124.75	118.75	111.25	115.5	118.25	118.5	118	118	106.25	93.25	92	84.75	91.75	97.75	109.25	101	109.75	101.25	101.25	96.75	100.5	95.25	95.5	94.5	94.5	90.75	94	93.5	96.25	98.25	98.25	93.75	92.75	88.5	88.5	87.5	92.75	105	103
575	252.5	136	121.25	119.5	109.75	114.5	114.5	111	95.75	89.75	89.75	92.25	84	92.75	105.25	91.5	92.5	94.25	88.75	80	76.75	73	63.5	63.5	69.5	72.75	73.25	73.25	71.75	82.5	93	76.75	79.25	78.75	72.75	70	72.75	72	70.5	71.25	165.25	311.25	359.5	379.25	336.5	297.75	264.75	237.5	229.25
291	177.25	141.5	99.5	80.75	55.25	58.75	58.75	58.25	58.25	57	52	50	50	86	84.75	185	185.5	120.25	55.5	70.25	62.25	76	103.25	189	255.25	318.25	321	333.75	333.75	352.75	349.25	354.5	411.75	411.75	456	511.75	588.25	618.25	575.75	657.5	618.75	513.25	410.25	340.25	283	280	283	282.25	268.25
337	203.25	203.25	142.25	182	169.75	162.75	113.25	111.25	98	92.75	92.75	84.5	82.25	88.75	88	80.75	90	102	92.5	105.75	421.75	1054.25	1413.5	1423.75	1488.5	1511.75	1513.25	1530.75	1583	1553.25	1562.25	1562.25	1522	1522	1551.5	1571.5	1596.25	1658	1614	1607.25	1655	1689.25	1624	1617	1639.5	1639.5	1635	1635	1609
914	951.25	994.25	1032.5	1040	1082	1077.25	1044.5	1022	992	992	988	996.75	1061.5	1137.5	1199.5	1265.25	1265.25	1225	1184	1173.25	1159.75	1176.25	1199.25	1199.25	1249.5	1286	1283.5	1273	1273	1267	1267	1283.25	1289	1348.75	1346.5	1312.25	1230.75	1169.75	1098.25	1067.5	1068.25	1071.75	1145.5	1189.75	1199	1223.5	1258	1290.5	1327.5
333	403.25	403.25	372.75	252.75	258.5	167.5	133.5	111.5	119.5	119.5	146.25	768	1874.75	2413	2413	2023.5	1370.75	1020.5	1020.5	1064.25	1117.25	1194.5	1194.5	1126.75	1159	1256	1088	1136.25	1219	1321	1126.5	1126.5	1072.25	1029.5	1029.5	1049.5	1152	1292	1484.75	1638.75	1763.75	1763.75	1769	1801	1884.75	1982.5	2000.5	2000.5	2000.5
181	1050.25	1240.25	1240.25	929.75	734	734	659	627.75	626.5	603	568.25	535.5	535.5	547.75	566.5	608.5	645.5	700.75	696	679.5	629	570.25	551.5	534.5	539.75	503.5	503.5	524.75	585.5	644.5	644.5	610.25	495	288.75	178	162	162	177.25	181	181	195.75	195.75	201.5	199.5	199.5	186.5	167.75	145	145
464	465.5	450.5	431.25	451.5	556.25	673.25	761.25	798.5	773.5	730.75	714.75	629	587.5	612	620.5	598	598	610	595	511.75	499.75	471.5	468	498.5	494	394.75	404.5	341	296.75	255.25	207	196.25	196.25	220.75	256.75	282.75	286	286	312.5	324.25	320.5	366.75	328.75	315	317.25	317.25	317.25	317	323
1876	682.75	243.75	190.25	190.25	166.5	163.75	155.25	150.75	138.5	138.5	131.5	118.25	126	130.75	130.75	167.75	167.75	183	174	123.5	123.5	123.5	134	188.75	232.5	233.5	241.25	264.5	261	250.75	271	279.25	262.25	262.25	261	236.5	240	240	213	359.25	349.25	196.75	202.5	243	214	237.5	270.5	316.5	314.5
69	69.75	69.75	77.75	70.75	80	75.25	79.5	80	91	85.25	92.75	93	93.5	87.75	88.5	85	82	80.75	81	78.5	74	75.25	70.75	70.75	71.75	73	68.75	75.75	84.5	94.5	94.25	114	98.5	83	92	110.5	108.25	111.75	111.75	111.75	109.25	109.25	115.75	122.5	115.75	119.75	121	119.25	107.25
735	644	558.75	440.75	440.75	528	543.75	628.5	885.5	1809.75	2461.25	2826.5	2826.5	2226.5	1783.75	1443.5	1290.75	1168	1043.25	1013.75	992.5	992.5	1040.5	1012	1034.75	1272.75	1559.5	1704.25	1794	1869.75	2073.25	2240	2333.75	2570.75	2877.5	3176.25	3565	4028	4488.75	4758.5	4850.5	4951	5036.75	5054.5	5162.5	5162.5	5214.75	5204.75	5014.75	4946.25
322	684	980	1140	1140	1055	979.25	944.5	911.25	864.5	817.5	861	839	850.25	903.25	935.5	958.25	958.25	966.75	947.25	920.75	871.5	827.25	812.5	805.75	832.5	873.5	909.75	904.25	949	958.5	956.5	962	983.25	983.25	978	1001.25	967.5	956.5	929.5	923	923	984.75	1029.25	1082.25	1082.25	1082.25	1033.5	1071	1015.5
95	95	91.75	92	92.75	101	125.5	173.5	183.5	196.75	201.25	227	238	318.25	401.75	390.75	395.5	361	303.25	283.5	283.5	285	285	355	378.5	561	735	677.5	624.25	615.5	464	341	341	419.25	494.75	550.75	555.75	555.75	509.75	437	397.25	364.25	321.75	294.25	294.25	337.75	496.75	647.75	647.75	635.25
189	178.25	172.5	162.75	168.75	168.75	167.5	167.5	178.75	175	189.75	197.75	188.25	188.25	194.25	196.25	189.25	187.25	171	172.25	168.75	174.25	174.75	184.5	174.75	164.25	153.75	144	126	95	68.25	63	63	64.25	67.75	72.75	82.25	73.5	83.5	83	81.75	81.75	92	94.5	102.5	111.25	111.5	109.5	122.5	113
34	31.25	35	36	33	32.5	34.5	70.75	78.75	78.75	79.5	79.75	200	625.25	908.25	934.5	869	914.5	914.5	957.25	957.25	945.5	1036.5	895.5	775	777	799.25	799.25	920.75	930.75	986	973.75	953.75	953.75	997.5	971.5	1007	1038	977.75	977.75	1054.5	1073.5	1077	1085.75	1085.75	1092.5	1092.25	1098.75	1137.25	1105.25
313	294	260.5	224	187.25	156.5	150.5	147.75	154.5	166.5	196.75	241.25	241.25	196	179.5	141	128	129	129	134.5	138.5	138.5	128.5	116.5	114.5	114.5	123.5	128.5	133.5	133.5	128.5	126	114.75	108	114.75	148.25	313	337.75	337.75	321.25	189	181.5	172.5	172.5	169	186	238.25	270.25	223.5	234.5
201	177.5	140.5	120.75	120.75	118.25	114	103.75	93.5	93.5	90.25	94.25	102.75	104.5	98	98.5	93.25	87	87	90	94	94	92	79.5	85.5	69.5	76.75	94.75	101	89.75	93.75	91.25	91.25	83.75	82	75.75	81.5	81.5	93.75	105.75	115	115	110.75	108.5	106.25	99.5	100.5	99.25	99.25	101.5
789	603.5	481.75	407	362.75	334.75	334.75	319.5	305.75	278.5	308	270	260.5	263	263	252.25	242	240	231.75	225.25	229.75	238.75	217.25	210.25	237	247.5	276.5	299.75	299.75	288	287.25	280	280	422.75	685	744.25	745.25	694.5	653.25	622.25	651.25	666.75	651	641.5	636	614.75	593.25	584.5	584.5	617.25
112	102	102	90	71	61.25	50.25	50.25	57.25	54	42.5	42	40	40	42.25	48.25	49	49.25	48	51.25	53	53	48.5	51.5	53.5	50.5	57.75	57.75	51.5	46.75	47.75	46	48.5	47	52.5	47.25	43.5	41.5	46.5	45.25	46	46	46	44.5	44.5	43.25	73.25	77.25	77.25	108
1143	1292.75	937.75	988.75	988.75	711.75	711.75	525.25	257.25	290	290	272.75	270.75	294.5	246.5	368.25	337.5	340	257.5	386.5	369.5	541.25	832.75	961.5	1359.5	2057.5	1938.5	1811	2007.5	1709.25	1508.75	1304.5	1304.5	799.75	333	195.5	164.75	185.25	224.25	251.25	216.75	262.5	238.25	171.75	133.5	138	132.5	139.25	137	164.75
630	571.25	533.5	492.75	446.75	446.75	426.5	425.75	418.25	413.5	381.75	369.5	369.5	355.75	360.25	358.5	354.5	349.25	354.5	351	339	329	329.25	329	334.25	342.25	345.25	340.25	321	317	310.75	299.25	313	313	305	291.25	284.75	268.75	263.75	262.75	275.5	261.25	272	280	267	257	272.5	276	263.5	274
108	94.25	71	55.25	50.25	50.25	49	49.5	128.5	258	331.5	361.75	350.25	355.75	376.5	377.25	380.25	380.25	390	424.5	415.75	415.75	597.75	871.25	979.5	988.25	939	928.5	880	867.5	873.75	886	844.25	888.25	871.25	850.5	889.25	889.25	829	785.5	717.5	703	703	680.25	651.75	682.25	690.5	690.5	728.75	753.25
1983	1846	1769	1570.5	1315.75	1117.5	1078.25	1067.25	1067.25	1009.25	959.5	953.75	868.75	817.25	880	854.5	799	762.25	762.75	709.25	650.75	621.25	558.75	480	486	396.75	396.75	424.75	424.75	361.5	414	371.5	383.5	424.25	426	384	430.5	378	389.25	361.25	445.25	361.25	426.75	369.25	467.25	696.5	1251.5	1478	1478	1446.5
234	234	233.75	205.75	248	278.75	278.75	278.5	278.5	265.25	246.25	233.75	232.25	219.75	220.5	225.75	244.25	251	266	266	289.5	300.75	291	266.5	284.25	279	279	276	290.75	283.5	273.25	273.25	280	266.75	273	270.25	252.5	241	233.75	227.25	221	209.5	204.25	203.75	183.25	178.5	187	196.75	181	179.5
159	96	65.5	55.25	55.25	67.5	82.5	99.5	121.25	119.25	124.5	102.25	81.25	78.25	85	76.5	74.75	73.25	63.5	63.5	58.5	58.25	56.75	63.25	63.25	74.5	75.75	79.5	77.75	80.75	90.25	128.5	142	160	147	146	130.5	134	105.75	86	79.75	100.75	83	98.75	94.25	95.25	74.25	90	72	71.5
79	77.5	84.75	82	110.25	112	102.75	61.25	61.25	56	54.75	51.75	51.75	52.5	50.5	50	50	50	48.5	48.5	44.5	42.5	36.75	38	36.75	42	43.75	46.25	43.75	45.75	47.25	46.5	79	81.5	80.75	48.5	55.5	55.5	59	61	62	59.75	59.75	56.5	58.75	60.75	67.5	61.75	61.75	55.5
378	360.5	346.5	346.5	360.5	364.25	357.5	368.75	373.75	388	420.5	457.75	460	465	454.25	454.25	436.25	436.25	448.75	458.5	458.5	461.75	461.75	459.75	453	453	466	489	489	506.5	505	491	482.75	508	482.75	484.5	520.75	501	545	547.75	491.75	414.5	440.5	440.5	444.5	444.5	444.25	435	435	448.25
215	207.75	189.5	174.5	161.25	144.75	123.25	119.75	107.75	103.75	90.25	83.5	83.5	84.5	91.25	95.25	95.25	103	92.25	80.25	74.25	106.25	73.25	75	68.75	73.5	73	73.75	73.75	74.5	79.25	81	81.25	75	74.5	74.5	70.25	72	74.75	74.75	72.25	75.25	71.25	73.75	85	96.5	83.5	87.25	84.75	77
495	271	159.25	159.25	125.5	120.5	110.75	109.25	101.5	98.5	89.5	82.5	83.25	91.5	91.75	91.75	100.5	100.75	90.25	80.5	80.75	80.75	78.25	78.25	80.75	80.75	74.5	67.25	73	73.75	80.25	90.25	96.75	145.75	145.75	142	84.25	77.5	74.25	74.25	74.5	78.5	75	75	71	77	69	77	83.5	87
129	229	551	1038.5	1348.25	1406	1419.75	1328.25	1254	1227.25	1241	1164.5	1194	1140.25	1124.25	1052.5	1166.5	1092.25	1114.75	1068.5	1060.75	1022.75	978	931.5	825.5	662	655.5	611.75	581.25	649.25	729.25	649.25	596.25	651.25	567	536.5	581.5	552.75	422.25	432	337.75	289	260	289	330	460.75	627.25	756	876	1002.75
145	163.25	345	602.5	871.25	871.25	671.25	512.25	458.5	404	404	415.5	429.5	505.5	675.5	758.25	797.75	820.5	842	842	854.75	878	898.25	925.75	1126	1645.5	1997.75	2161.5	2049	2052.25	2063.25	2163.25	2159.5	2221.75	2286.25	2364.5	2277.75	2352.75	2405.5	2390.75	2454.25	2566	2450.75	2335.75	2154.75	2154.75	2294	2948	3383.5	3533.75
1068	982.25	516	287	210.25	210.25	269.25	266.25	210.75	194	134	119.25	105.5	101.25	102.75	103.75	103.75	100.25	100.25	90.25	85	83.25	80.25	74.75	75.25	69.5	66	69.75	87.5	78	75.25	75.25	68.5	61.25	67.5	83.75	95.25	142.25	142.25	134.75	130.75	86	86	92	108	108	102.75	95.25	73.25	68.5
266	159	111.25	89.5	84	94.25	86.5	86.75	87	81	75.75	70.5	70.75	63.75	65.75	72.5	78.5	78.5	78.5	72.75	69.25	53.25	44.25	49.25	48.75	48	50	52	45	46	43.25	41	41	43	45.25	94	96.25	180.75	180.75	95	53.5	51.5	48.5	47.75	43	43	40	39.5	44.25	47.25
203	95.5	53	50	49	50	60.25	62.75	82.25	89.25	97	89.75	99	99	132.25	155.75	192.75	225.25	276.25	276.25	260	243.5	228	207.75	236.25	223.25	223.5	221.25	234.5	235.25	284.5	280.25	279.5	227.75	251	204.25	214.25	224.25	246.5	218.25	246.5	262.25	241.75	200.5	238.25	226.5	217.5	234.25	284.75	280.25
176	76.5	37	30.5	25.5	25	23.75	23.75	25	26.5	26.5	27	28.25	27.25	31	32.5	36	29.25	32	28	25.75	25.5	23	21.25	22.25	22.25	20.25	21.25	21	20	20	20.5	20.5	18.5	16.75	20.25	26	20.5	32.25	33.75	27.5	21.5	22.25	21.75	23.75	21.25	25	28.5	27.5	23.5
315	175.75	117	105.5	98.25	85.25	85.25	84.75	83.25	84.5	81.25	81.25	151.75	141.5	136.25	146.5	78.25	76	78.5	78.5	78.5	80.25	107.75	104.75	104	90.5	64.25	63.25	75.75	78.25	90.5	87.75	81.5	70.5	60.75	60.75	59	65	67.25	68	57.25	67.25	61.25	61.25	66	75	73.5	73.75	73.75	154.25
253	183	183	143.5	110.25	77.25	62.5	54.75	50.5	46.5	41.5	43.75	47.5	46.5	49.5	50.25	53	53	52.75	49	48.75	50.75	56	78.75	91.75	92	112	107.5	89.75	105.5	109.25	90.25	88.75	112.5	112.5	157.75	170.75	181.75	175.75	145.25	117.25	116	115.5	111.5	113.5	130	132.75	143	223.25	267.5
367	222.25	140.5	121.25	104.75	94.75	104.75	222.25	203.5	199	274.5	189	189	230.5	246.75	271.5	288.25	288.25	297	250.5	147.5	83	140	78	76.25	74.5	68.75	62.5	62.5	60.25	56.25	47.75	58.25	49.5	50.75	61	65.25	62.75	75.25	62.75	93.5	97	105.25	69.75	70.75	67	69.75	74.25	92.75	92.75
107	48.75	21	15.5	15	14.25	14.25	16.5	16.75	19.75	19.75	15	13.5	11	11	11.25	11.25	10	10.25	10.25	32	33.75	34.5	34.5	13.5	13.5	13.75	13.75	12.75	35	35	12.75	11.25	11.5	11.5	10.75	11.25	12	13.25	13.25	13	45.75	46	114.25	53.75	152	78.75	78.25	57	118
167	162.75	143.5	128.25	113.5	109.75	113	111.25	112	115.75	110	98.5	91.25	92	92	88.5	85.25	90.75	210	82.5	80.25	207.25	449.75	194	332.75	327.5	327.5	230.5	247.25	254.25	357.5	357.5	405.5	434.5	485.25	580.75	763	763	789	732.25	806	438.75	447.25	403	721.75	571	691.75	691.75	789	789
206	206	154	186.75	158	165.5	100.5	126	100	100	92.75	113.25	185.5	400.25	441.5	458.5	341.25	301.5	275.75	304.75	329.75	432	496.75	496.75	616.5	616.5	665	818	818	669.25	660.75	604.25	459.5	543.75	543.75	507	525.25	620	742	971	986.25	1010.75	998.5	1030.25	1153	1610.5	1740.25	1740.25	1556.75	1705.75
139	139	119	102.75	96.5	85.5	71.75	71	71.25	69.5	66	67.25	128	263	369.5	419	641.25	1137.75	1675	1755.75	1655.5	1646	1101.25	901.5	840.25	906.75	735	906.75	749	655.5	670	796.25	720.25	773	773	783.75	774.75	819	1148.5	1148.5	1137.25	992.5	463.75	358.75	358.75	378	378	471.75	492.75	691.5
236	138	105.75	105.75	98.25	97	89.25	78	72.75	78.25	78.25	72.5	71	132.5	269.25	261.25	380.25	553.5	892.5	1040.25	1187.75	1548.5	2078.5	2261.5	2110.25	2110.25	1883.75	1720	1747.75	1852.75	2322.75	2410.5	2432	2346.5	2514.75	2202.5	2213.5	2294.25	2198.5	2124.25	2004	1818.75	1663.75	1616.75	1607.5	1603.5	1603.5	1640	1603	1676
148	235.75	217.5	380.75	534.5	473	368	457.5	285.25	138	72.25	72.25	71.75	72.25	66.5	75.5	75.75	68	54.75	48.5	43	43	65.75	139.5	145.25	145.25	81	106.25	79	139.25	139.25	157.25	255	523.5	328.5	603.25	813.5	603.25	518.25	706.75	561.75	393.25	393.25	450.75	309	529.75	831.5	855.25	644.5	701.75
95	84	69	58.25	51	50	55.5	48.25	102.5	107	319.25	518.75	518.75	502.25	499.75	220.25	60.5	65	54	53.5	53.5	118	285.5	289.75	289.75	136.75	71.75	62.25	66.75	96	81.75	86	86.25	61.75	61.75	78.5	104.5	212.25	440	629.5	629.5	613.25	496.5	422.25	394.75	398	428.75	431.5	423.25	389.75
175	144.25	144.25	117	96.75	91.5	91.5	91	94.75	94.75	97.25	92	89.5	92.5	105.75	172.25	317.5	410	410	329	183.5	85.75	85.75	85.75	86	378.25	406.75	284.25	621.5	741	627.25	698.75	705.5	609.5	538	500.5	360.25	297.75	318.25	446.25	824.75	831.75	831.75	754.25	707.75	433	395.25	462.25	257.5	215.75
123	134.5	134.5	123.25	90.5	82.5	78	77.5	81.25	81.25	81.25	272.5	271.5	344.5	346	117	76	76	73	73	69.5	73.5	71	95.75	95.75	146.25	261.5	445	623	749	870.5	777.5	895.25	839.5	752	527.5	566.25	443	455.75	525.5	592	546.75	764.25	771.5	665.25	665.25	733.25	671.75	686.75	615.25
121	114.75	100.75	87	79.75	79.75	77.75	75.75	91.25	161	245.25	365.75	365.75	316	538.75	1089.5	1169	1270.5	1298.75	866.5	419.5	262.75	136.5	128	192	319.25	550.5	666.75	716.25	744.5	726.5	726.5	740.25	740.25	781.5	874.75	990	1097.5	1266.25	1484.5	1484.5	1484.5	1533.5	1674.5	1556	1556	1447.5	1196.5	1066	994.25
118	118	91.75	69.25	62.5	54.25	44	44	52	52	56.5	56.5	60.25	94.25	90.75	51	51	48.75	44.75	43.25	40.25	42	41.75	47.25	46	98.25	96.25	101.25	72.25	121	121	121	115.5	132	175	213.25	215.5	231	190.25	190.25	99	99	90	114.75	90	90	440	432.5	603	1236.5
214	214	170	141	126.5	116.75	120.25	262.5	291	291	290	115	94.5	87.25	87.25	112	154.25	199	420.5	376.75	362.25	653.25	535.75	385.75	548.25	595.5	595.5	599	680.25	789.75	850.5	820.5	820.5	820.5	773.5	698	791.75	816.25	816.25	1590	2975.5	2895.25	2895.25	1509	729.25	729.25	750	731.5	740.25	815.5
300	259.5	259.5	264	232	270.5	247.75	156.5	118.25	134	134	136.25	281.75	407	647.5	425.25	425.25	389	295	175.25	120.25	133.25	133.25	107.75	102.75	162	149	199.5	245.25	383.5	269.25	269.25	176.25	160.25	160.25	112	259.25	415.25	676	493	490	314.5	393.5	393.5	550	678.75	845.5	1061.75	885.25	885.25
259	259	211.5	202	234.25	252.25	249.75	271.75	293.25	291.5	412.5	439.25	439.25	304	328	328	337.5	355	385	416.25	511.5	692.5	692.5	496.25	398.75	257.75	257.75	270.25	270.25	296.25	284	285.5	312	323.75	330	499.5	462	543.25	547.5	547.5	409.5	409.5	776.25	1598.5	1873	1873	1404	834	680	580.25
172	143.75	121.5	104.75	102.25	108.75	110.25	180	180	226.5	141.5	139	106	106	96	86.75	86.75	80.75	84.5	81.25	86.25	72.75	86.25	86	92.25	97.75	99.75	95.75	90.25	87.75	87.75	85.75	89.75	98	110.5	106	118.25	121.75	143.25	140.75	140.75	103.75	87.5	87.5	85	85	149.75	157.25	100	99.5
162	171	286.75	548	759.5	759.5	809.25	797.5	688.5	636.5	636.5	636.5	620.75	565	551.5	672.25	698.25	976	1176.25	1219.75	1272.25	1216.5	1195.25	1192.75	1137	1066.75	949.25	870	862	909.25	909.25	909.75	949.25	973	978.25	996.5	1004	1067.25	1157	1131.5	978.5	887	813	813	973.75	1101	1101	1113.75	1112.25	1151.75
3739	3503.5	2995.5	2618.75	2430.75	2360.75	2209.5	2209.5	2200	2276.75	2143.25	2174.75	2134.75	2115.5	2073.5	2115.5	2132.25	2175.75	2221	2221	2184.75	2040.75	1991	1991	2040	2120	2190.75	2190.75	2142.5	2142.5	2503	3189.25	3370	3432.5	3432.5	3167.5	2881.5	2807.25	2647.25	2601.5	2601.5	2637.75	2688	2818	2908.25	2908.25	2908.25	2937.25	2894.5	2841.5
15610	15739.2	15557.2	15655.5	15871.5	16186.2	16768.8	16874.8	16882.8	17236.8	17078.5	17400	17676	17029	15903.2	16386	16386	16594.2	17639.2	18353.8	18500.5	18372.2	18296.5	18495.8	18556	18965.5	18946.5	18946.5	18525	17708.2	17708.2	17935.2	17224.2	18540	19275.5	20004.5	21230.8	21979.5	22153.2	22112.5	22218.8	22218.8	22260	22176.5	22475.8	22617	22573.2	22473.2	22576.2	22465.2
8827	8130	8001.25	8001.25	8313.75	8542	8542	8532.5	8176.5	7789.75	7553	7553	7666.75	8010.25	8400.5	8400.5	8424.75	8424.25	8196.25	8172	8195	8083.75	8009.75	8009.75	7847.5	7615.75	7632	7632	7818.5	7813	7747	7182.75	6320.5	5499.25	5499.25	5142.5	5131.25	5101.5	5101.5	5101.5	5052	5029.75	4859.5	4292	4292	4333.75	4700.5	5476	5855.25	6153
4559	4868.25	4906.25	5066.5	5071.25	4991.25	4848.5	4848.5	4669.75	4621.25	4413.75	4413.75	4417.25	4549	4341	4388.5	4388.5	4543.25	4522.25	4618.25	4620	4550	4432.75	4259.25	4255.75	4151.75	4151.75	4117	4192.5	4192.5	4383.25	4574.5	4595	4595	4486.25	4486.25	4497.75	4645.25	4933.25	4933.25	4964	4816	4605.5	4605.5	4605.5	4553	4504.5	4542.25	4483.5	4483.5
33067	32951.5	32653.5	32854	32977.5	32896	34411	35687.8	35053.8	34774	34335.8	31976.8	30569	30569	30628	31771.5	33123.2	33126.5	32776.5	33755.2	34999.5	35902	36550	36550	36070.5	35520.8	35000	34225.5	33302	32702	32702	33526.2	35479.2	35831	35831	34599.2	32943.5	32943.5	33705.8	36151.8	37456.5	37947.2	38170.5	38476.2	38669.8	39614.2	39614.2	39787.8	39938	40765.8
100948	111796	118439	123548	127606	128399	128067	126080	125195	125000	125000	124580	124558	125281	123993	122624	120844	120141	118689	118689	116796	115873	115327	115327	115782	117344	119522	120503	120503	119856	117835	117443	116563	117910	118666	119590	118771	118771	117600	117418	117297	117669	118271	118271	114011	103190	92462.5	84338.5	76033.5	71688
1225	1225	1189.75	1110.75	1093.5	1093.5	1005	1005	1010.25	1125	1244.5	1244.5	1225.5	1054.25	896	799.25	748	725.75	725.75	841.75	963.75	1018.75	1018.75	1006.75	1006.75	1065	1037.75	1043.5	1129.75	1236.5	1239	1308	1308	1158.25	1048.75	1048.75	1125.25	1125.25	1104.75	1074.75	1014.75	1003.25	1140.25	1220	1318.25	1368.25	1450.5	1450.5	1429.5	1429.5
13821	14034.2	14888	15684.2	15684.2	15446	16449	16400.5	17460.2	17308.2	17308.2	16871.8	16641	16641	17075.2	17202	16263.2	16263.2	16073	14910.5	14528.2	14801	15477.8	14617.8	14617.8	13747.5	13248.5	12341.2	11661.5	12355.5	13460.8	13894.8	14804.2	15672.5	16482.2	17573.8	17279.8	17279.8	17454.8	19176.2	18211.5	18248	19599.8	18484	17189.5	16709.5	16560.8	16382.8	16576.8	16600
16850	17043.2	18441	20272	18363.8	17447.2	20391.8	20943.2	20852.5	23226	23226	22979.5	23750.2	23209.8	22449	22172.2	22023	22023	23590	24355.5	26945.2	28447.2	28073	28524.2	28524.2	28524.2	29098.8	28467.2	28557.8	30134	31274.8	32754	33044.5	33818.2	34248.2	32921	32818.8	33852.8	33534.5	32120.8	31577.5	30545.2	29225.2	28881.8	28559	29525.2	28689.8	29066.5	28683.8	28165.8
36103	36269.2	36495.8	36708.2	36732	36732	37058.2	37629.5	37953	37953	37856.8	37460.5	36899.5	36568.8	36488.8	36331.2	36490.5	36490.5	36295	36133	36245.8	36230.8	36537	36711	36724	36707	36600.2	36111.5	35508.2	34772.5	34077.5	33397.8	33397.8	33553	33874	34146	34197	33927.5	34015.8	33851.8	33851.8	34029.8	34297.8	34533.2	34948	34886.5	34790.5	34574.8	34974.5	34288.8
6035	6035	6035	5769.75	6068	6471.75	6206.5	6255.5	6279.25	5496.5	4841.75	5383	5325	5852.5	5843.25	5722	6004.25	6241.75	6069.5	6988	7530.25	7509.5	7509.5	7499.5	7292.5	6703.25	6703.25	6999.5	7966	8699.25	8988	8988	9106.25	9402.75	9535.25	9543	9543	9715	9651	9981.25	10090.8	10379.8	10580.2	10643.8	10625.2	10625.2	10349.2	9899.5	9784.5	9784.5
12343	12343	12374.5	12507.2	12659.2	12628.2	12640	12519.2	12447.8	12350.5	12303.5	12101.8	12077.8	12177.5	12087	11996	12144	12144	12006.5	12024	12100	12050.5	11882.5	11862.8	11945.8	11941.2	11896.8	11912.5	11912.5	11742.5	11541.2	11408.2	11330.5	11330.5	11239.2	11227	11217	11371.5	11217	11200	11101.5	11034.5	10999.2	11037.2	10990.5	11010	11010	11120.5	11260.2	11330.2
15866	14249.8	14551.8	14549.2	12980.5	13406.2	14002.5	14233.5	13343.2	13343.2	14268.2	15294.5	15556.5	17040.8	17969.8	19193.8	20655.2	21616.8	21616.8	21370.8	21203.8	21065.8	20783.2	20783.2	21040	20901.8	20737.5	21174.8	21079	20853.5	20643.5	20643.5	19820	18379.5	17564.5	17106.8	16317	17106.8	17417	17777.2	18619.2	19742	20298.5	20552.8	20552.8	20031.5	19821.8	19662.8	19654	19729
13838	12918.5	12982.5	12545.8	12407.8	12472.5	12367.5	12327.5	12118.8	12017.8	11436.5	10951.5	10859.5	11381.5	10754	11137.2	11496	11306	11306	11714.2	11725	12474.2	13440.2	13905.5	14119	14119	13873.2	13984	13569.5	12805.2	12719.5	12159.2	11651.5	11510.2	11446	11459	11459	11495.8	11566.2	11844	12449.2	13100.8	13100.8	12395.5	12070.5	11744.2	11744.2	12367.2	12667	12762.2
33544	35154.2	37175.2	38731.5	39455.2	39814.8	40367	41353.5	41608	42246.5	42802.5	42339.5	41939.8	42711	42044.2	41419.2	41361.5	41464.8	41464.8	41689	41689	41970	42552.8	42831.5	43884.2	44465.8	44465.8	44600	44530.8	44477.2	44394	44608.5	44313.8	44084.5	43420.8	43228	42845.8	42845.8	42337.2	41730	41292.8	41034.2	41034.2	40845.8	41045.5	40986.8	41418	41539.8	42240	42601
44058	43588.8	43009.5	42558	42813.2	42659.5	42659.5	42230.5	42139.2	41520.8	41374.2	40748.2	40032.8	38504.2	37418.5	36243	34653	33682	33642.5	33904.5	33904.5	33810	33926	34084.5	33708.5	33939	33939	33232.2	32863.8	32847.2	32482	32787.8	33179.2	32965.8	32429	32496.2	32050	31603.8	31436.8	31881.8	32099.8	32414.2	32893.5	32909.8	33420.5	32672.5	33207.2	34010.5	35101.8	36166.2
40496	38726	37287.8	37036.5	36245.8	36097.8	36361.2	35877.2	34482.5	35473.2	35361.2	35361.2	36749.2	38566.5	39357.8	39357.8	39349.8	39146.8	38641	37235.5	37268.8	36783.8	35885.2	35903.8	37203.8	36431	36818.8	36804.5	38428.2	38196.8	39285	39332.5	39960	39792.2	39943.5	39693.2	38539.2	37206	36255.8	35050	35050	34817.8	35830.2	35760.8	36379.2	36294.5	36203	35569	36239.2	36249.5
12956	13515.5	14184	14724.2	14718.2	14902.5	15141.2	15252.2	15291.2	15291.2	15056	14966.5	14770	14770	14357.8	13746	14207.8	14246.5	13833.8	13350.8	13158.2	12178.2	11554.8	11096.5	10831.5	10831.5	11058.2	11545.2	11657	11804	11667.8	11708.8	11900.8	12398.8	13144	13788.2	13855	13930.5	13706.5	13706.5	13764.8	13764.8	14167.5	14251.8	14139.2	13801.2	13794	13775.8	13775.8	13525.8
1651	1499.25	1438.75	1420	1422.5	1446	1433.75	1468	1513.25	1515.25	1494.75	1495.5	1495.5	1457.5	1414.75	1398.5	1398.5	1384.75	1344.25	1314.25	1338.75	1298.75	1287.25	1202.25	1139.25	1059	1059	1091	1163.5	1145.25	1204.75	1216	1184.5	1093	1179	1139.5	1077.75	1134.75	1186	1199.5	1196.25	1196.25	1155.25	1061.5	965.5	940.5	935	960.5	971.75	981.5
11266	11274.2	11479.2	11605	11344.2	11539	11334.2	11408.2	11064.8	10805.5	9984.5	9284.5	8888.75	8856.25	8612.25	8827.5	8979	9366.5	9985.5	10005.8	10014.2	9584.25	9206	9206	9237	9165.5	8713.75	8399.25	8161.5	8161.5	8360.25	8700.75	8903.25	9145.75	9145.75	8929.75	8899.5	8780	8780	8523.75	8281.75	8382.5	8992.5	8959.75	9505.25	9760	9760	9619.75	9619.75	9450.5
1754	1700.75	1655.75	1655.75	1732.25	1716.25	1702.25	1746	1678.25	1642	1613.75	1652.75	1614	1607.5	1639.75	1646.5	1621	1668.75	1698.75	1697.5	1744.75	1747.75	1720.5	1720.5	1651.75	1556.75	1510.5	1510.5	1534.25	1534.25	1520	1492.5	1493.75	1493.75	1558.25	1600.75	1600.75	1616.75	1610	1570.5	1521.75	1512	1499	1500	1503.5	1506.75	1531.5	1602.5	1709.75	1853.5
1092	2253.25	3898.5	5698.75	6689.25	11196.2	20138	24182.2	24182.2	23225.8	22599.5	21438.5	18934.5	18934.5	18841.2	18535.2	20279.5	21669.8	21669.8	22548.8	24185	25343.8	25905.2	26079.8	26349.5	26867.8	27155	27384.5	27419.2	27434	27306.8	27306.8	27122.5	26924.8	26805.2	26744.2	26744.2	26841	26939.5	27174.2	27590.5	28063.8	28311	28420.2	28420.2	28393.8	28393.8	28608.5	28602.5	28940
30124	30124	29841.2	29949.8	29580.5	30127.2	28952	30127.2	28701.8	26193.2	25515.8	26195	24391.5	26195	26398	24617.2	23908.8	24850	24465	24479	25173.5	26580.5	28390	29392.2	29392.2	29194.5	29177.8	29452.5	29420.5	29699.2	29699.2	29527.5	28508.5	27470.2	27182.5	26885.5	26534.5	26573.5	26428.5	25260	25903.5	25903.5	24580.8	22936.5	23315.2	23203.5	24414.2	26593	28061.8	28226
1334	1383.5	1401.25	1441.25	1441.25	1431	1385.75	1325.25	1325.25	1347.75	1317.25	1296.75	1283.25	1252	1246.25	1200.25	1204.25	1240	1258	1284.75	1294.25	1304.5	1269	1260.25	1259.5	1269	1271.75	1285.25	1288.5	1275.75	1297	1320	1323.75	1322.5	1357.75	1352.75	1371.25	1404	1439.25	1479	1487.25	1487.25	1491.5	1483.5	1442.5	1474.75	1509.5	1513.5	1552	1553.25
2840	2842.25	2883.25	2885.75	2908.5	2842.5	2915.25	2867.75	2889.5	2929.5	2980	2980	2982	2982	2932.5	2868.75	2810.25	2774.5	2765.5	2752.5	2775.5	2797.75	2794.25	2766.5	2816.25	2799.25	2750.25	2750.25	2813.75	2741.25	2701	2669.75	2652.75	2605.5	2621	2603.25	2581	2581	2635	2676.5	2725	2725	2778	2788	2743.25	2744.25	2806.75	2775.25	2728.5	2763
8036	8117.25	8208.5	8411	8599.25	8666.75	8666.75	8611.5	8555.5	8416	8084.25	7799.5	7677.75	7669	7693.25	7693.25	7693.25	7746.75	7786.25	7886	7974	8050.25	8156	8156	8016.5	8052.5	7875.75	7652	7590	7405.75	7374.75	7452.5	7571.75	7832.75	8345.5	8742.5	8789.5	8854.5	8822.5	8557.5	8141.75	7681.75	7189	6935	6869	6869	7035.25	7191.75	7434	7569.75
5114	5724.5	6214.75	6847.25	7417.5	7633.5	7688.5	7671	7769	7902.25	7972.75	8233.5	8420.5	8495.25	8495.25	8437	8373.5	8373.5	8427.5	8687	8735.75	8735.75	8795.25	8615.75	8585.75	8539.25	8561.75	8473	8535.75	8533.75	8530.5	8380.5	8034.25	7846.75	7846.75	8036.25	8585	8848.5	8848.5	8841	8757.5	8710	8710	8815.75	9028.75	9162.5	9221	9301	9363.5	9545.75
2414	2454.75	2486	2537.25	2489.75	2489.75	2514.5	2514.5	2401.25	2381.75	2238.5	2204	2202.75	2202.75	2202.75	2256.75	2268.5	2252.75	2370	2327.75	2323.75	2291.5	2291.75	2291.75	2272.75	2292.5	2292.5	2263.25	2157.5	2125.5	2125.5	2212.5	2354.75	2442.5	2511.75	2667	2756.75	2811	2837.25	2837.25	2853.75	2853.75	2834.75	2807.25	2750.25	2721.75	2704.5	2720.5	2686.75	2655
10835	10835	10890	11050	11088.2	11088.2	10964.8	10656	10510.5	10454.5	10361	10378.2	10292	10169.5	10169.5	10039.5	10042	10284.2	10430.8	10527	10607.5	10530.2	10532.5	10607.8	10624	10565	10535.8	10467.5	10421	10413.2	10455.5	10527.5	10657	10747	10830.5	10830.5	10872	10861.8	10838.5	10793	10809.8	10775.2	10835.8	10716.5	10582	10605	10739.8	10739.8	10823.5	10823.5
6171	7527.25	7985.25	8197.75	7903	7903	8229.25	8829.5	9144.75	9234.75	9319	9290	9290	9677.25	9914.5	9914.5	9846	9693.25	9558.25	9545.5	9653.75	9797.5	9742	9675	9637.5	9302	9302	9598.75	9755.5	9668.25	10016.5	10395.8	10697	11194	11194	11023.2	10421.8	9811.25	9509.25	9256.25	9256.25	9471	9461.5	9783.25	10477.2	11077.2	11440.2	11602	11393	11254.8
12453	13028.2	13510.8	13594.5	13688.5	13665	13627.8	13557.2	13573.2	13449.5	13612.8	13449.5	13428.5	13323	13255	13099.5	13273.8	13273.8	13174.5	13174.5	13395	13366.5	13303.8	13443.2	13483	13427	13314.8	13122.5	12878.8	12730.2	12730.2	12778	12680.5	12626.2	12742	12603.8	12497.8	12492.5	12450.5	12338.2	12262.2	12284.5	12403.2	12284.5	12408.8	12522	12546.2	12513.2	12551.8	12466.2
90569	96186.5	97738.8	99724.8	99129.5	99100.2	97310.2	97863.8	96709.5	96709.5	97883.8	100068	102644	102742	100624	99832.8	97530.8	97530.8	96012.8	96713.2	96326.2	97142	95086.2	94578.2	94152.2	95020.2	94992.2	95398.5	95398.5	96571.8	98719	97961	98472	99052.2	95796.2	95564.2	98243.2	98243.2	100933	100933	102963	103698	103698	103426	104684	105067	105067	103352	101588	95959.5
8806	8820.5	8898.75	9179.5	9308.25	9569.5	9936.5	10312.8	10621	11025	11211.2	11501.2	11580.2	11451.8	11497.8	11557.2	11442.5	11450.8	11595	11520.8	11575.5	11575.5	11545.5	11436.8	11301.2	11301.2	11288.2	11234	11280.5	11498.2	11476	11614	11759.8	11898.8	12008.2	12364.8	12463.2	12613	12504.5	12481.2	12441.8	12453.2	12399	12393	12435.5	12557.2	12835	12984.2	13113	13319.5
1478	1447.75	1439.5	1439.5	1487.5	1610.5	1741	1777.75	1743	1743	1699.25	1670	1596.25	1466.5	1382.5	1344.75	1344.75	1349	1345.5	1398	1398	1302	1205.25	1182.5	1174.75	1176.75	1216.5	1238.25	1270	1343	1359	1359	1359	1221.75	797.25	883	1188	1166	1500.75	1500.75	1390.75	1280	1137.25	935	812	808.5	773.75	759.25	750.5	750.5
37649	37649	38352	39605.5	39344.2	39230.8	38049.2	38045	37846.8	39046.5	39222.5	39759.8	39830.2	39762.8	39093.5	39434.8	38805.5	37622.5	37759.5	39200.2	38985.8	39801.2	39801.2	39546	39028.5	38560	38560	38073	37308.2	37513.5	38475	38031.8	37826.5	37751.5	37689.8	37655	37677.2	38282.5	38282.5	37944.2	38280.8	38202.2	37534.8	37231.5	37474.5	36556	36511.5	36511.5	37011.2	37074
10934	10941.5	11196	11577.8	11906	12450.2	12618.5	12678.2	12678.2	12327.5	11891.5	11480.5	11029	10641.2	10561.2	10329.8	10472.8	10609.5	10523.5	10163.5	10066.5	9729	9566.25	9688.5	9975.75	9976.25	10260	10632.5	11002.8	11344	11736.2	11842.2	12041	12041	12435.8	13476	14190.2	14258.5	14258.5	14088.8	13921	13921	13748	13736.5	13515.8	13329	12918.2	12873.5	12550.8	12423
21395	20648.8	19531.2	19531.2	20656	20189.5	21401	22708.2	23496.8	25141.2	26351.5	27789.5	28866.8	29269.5	29269.5	28888	28888	28757.5	28734.2	29107	28649	28277	28213.2	28213.2	28213.2	28464.5	28621	28809.8	28809.8	28493.8	27425	26513.5	25850.8	24669.5	22929	21291.2	20323.2	19734.5	18996.8	18805.2	18762.8	18503.2	18474.2	18431.8	18164.2	18120.2	18183	18452.8	18413.2	18637
23101	22619	22344.8	22301	22669	22669	22108	20864.2	19597.2	19071.5	19003	18704.2	18638.5	18369.8	18197.8	18204.5	18634	18256	18165.8	18246.2	17854.2	17467	16794.5	16034	16000	16218	16114	16326	16326	16326	16669.8	17149.2	17287.8	17581.8	17765.2	18183	18322	18322	18129	17271.8	17271.8	17305.5	17699	17699	17577.5	16604.2	16273.2	16099.2	16099.2	16483.5
3006	3061	3146	3244.5	3170.75	3152.5	3146.25	3170	3051.5	3052	3109.5	3095.75	3040.75	3040.75	2980.25	2918.75	2847	2825.75	2885	2901.25	3011	3084.75	3084.75	3044.5	3019.75	2955.25	2891.75	2891.75	2878.75	2923.5	2939.5	2939.5	2889	2856	2856	2810	2815	2750	2734.75	2717.75	2717.75	2723.75	2784	2835	2811.75	2862.75	2812.5	2812.5	2718.25	2777.75
307	307	307.25	304	280.75	261.75	233.25	233.25	233.25	235.75	223	231.25	227	230	223	240.75	221.75	213.75	218.5	219.5	208.25	207.75	200.25	197.75	197.75	199.5	206.75	213.25	218.5	227.75	223.75	222.75	213	202.25	202.25	206.75	209	209	201.5	194.75	194.75	188.5	201	221.25	228.75	225.25	231.75	238.25	230.5	234
5882	6284.5	6706.75	7099.5	7316	7446.5	7446.5	7585	7702.5	7810.5	7958	8163	8228.25	8290.75	8313.75	8422.25	8599	8832	9020.75	9025.5	8924.75	8878	8680.75	8680.75	8732	9008.25	9229.75	9420.5	9420.5	9187.5	9042.75	9026	8927.75	9023	9290	9756	10135.2	10146.8	10301.5	10301.5	10442.8	10522.2	10611.8	10718.2	10936.5	11046.2	11046.2	11244	11821.2	11721.2
65200	65200	65770.2	69579.2	74579.5	75728.5	75728.5	75624.5	75080.5	75080.5	75185	75185	75104.5	75392	76264.8	77752.8	77752.8	77524.5	74312.5	71416.2	71416.2	73936	75040.8	77169.5	77169.5	76473.2	74430	73925.8	72799.8	72799.8	72861	72986.8	72964.8	73829.8	74522.2	74522.2	73382.5	73073.5	72188.2	72188.2	73454.2	74973.8	77546.8	78606.5	79655.2	80628.5	81272.2	81087.8	81746.5	81746.5
20543	20739.5	20662.2	21104.2	21328.5	21270.2	21591	22063	22185.5	22422.8	22422.8	22422.8	22443.5	22862	23254.5	23616.5	23247	23681.8	23576.5	23751	23631.8	23669.8	23669.8	23726.8	23856	24473.8	25078	25474	25935.2	26064.8	26616	27455.8	28391.8	28972.8	29118.2	29338.5	29588	30182.8	31255.5	31924.8	32087.2	32087.2	32093.2	31881.8	31729.5	31212.5	30387.2	29882.5	30238.5	29882.5
35498	35040	34144.2	33425.8	32349.8	31829	31391.5	31976.5	31965.5	32756	32756	32059	29907.2	28260.5	26884	25717.2	24938.5	24386.2	24300.2	24031.8	23387.2	22372.8	21460.8	21379.8	20955.5	20440	20761.8	21169.8	21169.8	21507.2	22043.2	23341.2	24258.5	24805.2	25497.8	26028	27870.8	30283.5	30719	31144.8	30888.5	30966.2	30535.5	31179	30891	30891	30408	30491.8	30267	29859
53708	52877.5	51983	51278.2	51278.2	51707.2	52642.8	54001.2	54720	54791	55527.2	56689.8	57371	57549	57681.2	58485.8	58745	59565.2	60087	60584.8	60752.2	60752.2	61262.2	61839.2	61470.5	62162.5	62360.2	62528.8	62528.8	62459	62149.2	61344.8	59522.5	58502	58222	58222	58398.5	58398.5	57655	56840.2	56417	54413.8	50783.2	49135	49135	49254.8	49197.5	49785	50622	50622
61553	59041.8	58884	58884	60549.5	61201.2	61201.2	61299.5	61440.5	61869	61869	61869	60475.8	58480.2	57724.2	56174.2	57470	58345.8	59701.8	61747.5	63766	63766	63536.8	62989	61550.2	60041	58915.2	58527.5	58527.5	58527.5	58887.2	58873.5	58485	57568.5	58259.2	58086	58718.2	60197	61774	61600.8	61493.5	60206.2	58768.8	58768.8	59121.2	58821.8	59018.8	60253	60293.8	59794
5744	5734.75	5714.5	5722.25	5844	6030	6139.5	6187	6206	6206	6137.5	6032	5990.25	5958	5912.75	5973.25	5889.25	5871.75	5920.25	5964	5891.75	5978.25	5927	5793.25	5783.25	5857	6565.25	8264.5	9253.25	9390	9439.25	9494.5	9442.25	9430.75	9511.25	9365	9229.25	9288.25	9143	9143	9132.75	9258	9149.5	9323.25	9285.25	9329.75	9287.5	9329.75	9287.5	9307
26184	26832.5	26373.8	26660.2	26890.2	26915.8	26558.8	26581	26216.8	26379.5	26209.5	26172.8	26507.5	26915.8	26919.8	27350.5	27498	27689	27714.5	27928.2	28334.5	28973.8	28982.8	29436.2	29595.5	29595.5	29585.5	29550.5	29557	29557	29437.5	29468.8	29975.8	30424	30403.5	30732.8	30403.5	29706	28900.8	28332.5	27891.5	27504.2	27504.2	27759.2	28531.8	29097.5	29231.8	29034.5	29235.8	29586.5
19123	19211.5	19417.8	19783	19560.5	19313	19319.8	19159.5	19009.2	19009.2	18958.8	18788.2	18519	18205.5	17837	17592	17504.2	17504.2	17566.5	17839.5	17856	17899.8	17927.8	17744	17596.2	17693.5	17527	17506	17671	17785	17747.5	17747.5	17741.2	17727.8	17672.5	17605	17548.2	17516.2	17430	17430	17585.2	18113	18678.8	19085.8	19377	19550.5	19550.5	19513.5	19646.5	19735.2
8928	8690.5	8580.75	8387.5	8008.25	8007.5	8007.5	8136.25	8096.5	8096.5	7784.25	7303.5	6679.25	6361.75	6299	6380.75	6380.75	6390.25	6317.75	6473	6658	6948.25	7385.75	8291	8559.5	8559.5	8366	8324.75	8144.5	8209.5	8184	8184	7936.5	7894.75	7808.5	7807	7677	7588.5	7569	7605.5	7690.5	8301	8301	8403.25	8258	8467.75	8470.25	8570.75	8667.25	8955
46179	48626.8	49074.8	49738.5	50602.5	50424	50310	50490	50490	50259.5	49918.2	49699.8	49340.8	48249.5	45166	42310.2	41412	41405.8	41220.8	41181.2	41433.2	41908.5	43064.5	43064.5	42090.8	38981.5	37008.2	36671	36817.8	38015.5	41545	44721.5	46764	48228.2	48673.2	48673.2	49187.5	49225	49225	49795.8	50663	51564.5	52108	52188.5	52188.5	51954	51474.5	51474.5	51485	51646.5
12405	11674.8	11490.5	11490.5	11482.5	10972.2	10922.2	10464.8	10464.8	10585.8	11482.8	11578.5	11578.5	11060.5	11060.5	11232.5	22803	47154.5	62598.5	65298.2	67782.2	68003	68003	70084.5	69972.2	69972.2	70655.2	72126.8	71804.8	69585.5	67410.2	65013.8	61768.2	54793.2	45763.2	41360.5	39735.8	38711.5	37269.8	34632	31643	29748.8	28253.5	26407.5	24906	24589.8	24526.8	24603.2	27435	33182.5
85186	88778	91548.8	92864.2	93220.5	93580	94487.2	95334.5	95669.5	95669.5	96160	96179.2	95239.5	95347	95199	93863.2	92941	92384.5	92384.5	92445	93094.8	93097.2	93097.2	93375.2	94816.5	95367	96357.8	96357.8	96012	95390	94803.5	94448.8	94448.8	94268.2	94142.2	93834.2	93134.8	93050	93050	93597.5	94552	94948	94948	94018.5	93610.5	92701.5	92298.8	92827.2	93413.8	92744
3821	3711.5	3657	3525.25	3565.75	3622.5	3907.25	4129.5	4229	4383	4426.5	4541.25	4422.5	4421.75	4421.75	4314	4101.5	3966.25	4055.25	4055.25	4496.5	4914.5	4914.5	4962	5000.5	4772.25	4748	4891.25	4987.25	4946.75	5031.25	5114.5	5058	5034	5045.5	5016.75	4988	5012.5	4985	4923.75	4865.5	4893	4834.5	4851.5	4897	4879.5	4798	4783.5	4783.5	4729.25
15943	15922.8	16224	16205.8	15774.8	15876.2	15274.5	14458.5	13970	14201.8	13970	13644.8	13021.2	12316.5	12316.5	12295.5	12125.8	11982.2	12110.8	11966.2	11783.5	11783.5	12190	11676.5	11667	12335.8	12311.8	12270.5	12339.8	12339.8	12195.8	12195.8	12579.5	13483.5	13785.2	14188.8	14548	14935.5	14945.8	15196.2	15292	15292	15479.2	15157	14860	14605.5	14605.5	14605.5	15105	15594.5
138363	158930	166787	166787	168838	167516	164368	162550	162550	162550	163391	165258	164020	165593	163570	163570	162928	162928	162504	161542	157082	151383	144592	136318	127361	114789	106544	105406	104944	106789	107696	115385	126561	128858	128858	116740	104411	104411	97016.5	90312.2	90409.2	89127	89127	89387.5	93752.8	94705	97922.2	104230	108793	111605
15989	16050	16154	16143.8	16185.2	16125.2	15936.8	15773.2	15553	15553	15295	15166	15336.2	15336.2	15247	15444	15680	15592.5	15836.2	16153.8	16387.2	16545.8	16545.8	16748.2	16825.8	16575.2	16110.8	16001	15591.2	15306.8	15030.2	15030.2	15094.8	15382	15822.2	16212.2	16212.2	16694	16272.2	15123	12912.2	11862.8	11862.8	12001.8	12085.8	12117	12153.8	12200.5	12215	12589
58087	60262.8	62590	63694.2	64403.8	64510.5	64212.5	63864.2	63609.2	63143.2	63143	62604.8	62708.5	62323.8	61366.2	60499.8	60794.2	60285.5	59858.5	60279.5	60800	60471.5	60163.8	60052.2	58602.2	57544.2	57403.2	57380.2	56992.8	57143.2	57291.8	57318.5	57365.5	57906.5	58163	57816.2	57388.2	57103	56256	55378.8	54297.2	53562.2	53236.5	52983.2	52983.2	53295.2	53652.8	54191	55370.2	57223
7078	7354.75	7673.75	7769.75	7594	7568.75	7245	7173.5	7173.5	7099.5	6985.75	7283.5	6991	6410.75	5768.75	5528	5455.75	5465.25	5592.75	5698	5823.5	5863.75	5946.75	5911	5902.5	5813.5	5703	5703	5842.75	5863	5719.25	5801.5	5629.5	5629.5	5731.5	5886.5	5955.75	5955.75	5907.5	5812.5	5567.25	5470	5470	5262.5	5362	5538.75	5646.5	5869.75	5974.5	5974.5
17810	18399.8	19056.5	19056.5	18333.8	17707.5	16598.5	15976.2	15389	14280.8	12885.5	12126	11751.2	11751.2	11880.5	12270.8	13611.5	14858.8	15789.2	17316	19878.2	22093.2	22380.8	22380.8	22591.2	22941.8	23088.2	24084.8	24909.8	26094.5	27140	27140	26512.2	26981.2	26810.2	26068.5	25718	24691.5	24557.2	24287	24427.5	25384.8	25687	25073.2	24266.8	23624.5	22424.2	22240.2	22219.8	22454.8
1509	1483.75	1463.75	1443	1410.5	1355.25	1351.5	1354.25	1312.25	1287	1318.75	1269	1257.5	1272	1272	1272	1315.75	1303.75	1326	1336.75	1352.75	1290.25	1292	1227	1220.25	1196.5	1202	1216.75	1243.75	1246.25	1246.25	1237.75	1234	1234	1245.5	1281.25	1327.5	1364.25	1352	1349.5	1340.5	1262.75	1208.25	1220.25	1293.25	1289.25	1304.75	1304.75	1277.75	1233.5
15954	17409	18226.5	18608	18781	19078.5	19904.5	19904.5	19765.5	20570.8	21291.5	21322	21322	21408.5	21134.8	20508.5	20191.8	20178	19254	19709.2	19245.8	19283.8	19197.5	19197.5	19125.2	19353.2	19337	19221.5	19221.5	19464.8	19364.5	18884	18884	19676.2	20597.5	21459.2	21943.2	21998.5	21774.5	21380.8	20855.2	20357.8	20357.8	20594.5	20992	21294.5	21294.5	21044.8	20598.2	20027
33097	34937.8	35913.2	35913.2	36209.5	35826.8	34256.8	32827	32716	32328.2	31999.5	32053.8	32342.5	32039.8	31695.2	30900	29629.5	28919.5	28637.5	28527.8	28527.8	28451.5	28258.2	27944	27944	28302.8	28320.2	28328.5	28328.5	27787.5	27721.8	27121.8	27215.8	27469.2	27449.2	27451	27717	27717	28356	29356	30244	30244	31018.2	32122.2	32244.8	31672.8	31672.8	30928.2	30928.2	31241.2
38114	37427.2	37252.2	37252.2	37312.5	37312.5	37195.5	37303.8	37616.8	36801	36801	36718.2	35908.5	35908.5	35210.2	34859.8	35124.5	35423.8	35027.5	34722.2	35143.2	35411.5	36624	37394.8	37394.8	37170.2	37170.2	37575.2	40938.8	45860	48361.5	48678.5	48678.5	47771.2	46742	46742	46922.2	48568	48200.8	49529.2	49554	48922	47617	47153	44535.2	43397.8	42807	42206.5	41105.8	40819.8
2341	2305.75	2319	2267.5	2186	2109.75	2167.5	2106.75	2070.25	2087.25	2087.25	2033.5	2035.5	2043	2037	2021.5	2074.25	2092.75	2104.5	2138.25	2181.25	2246	2254.25	2305.75	2256.75	2256.25	2190.75	2194.25	2176.25	2213.25	2199.75	2199.75	2178.5	2137.5	2082.5	2044	2006.25	1960.25	1960.25	1939.5	1919.5	1920	1970.25	2006.25	2094.5	2154.5	2146.25	2196.25	2294.5	2377.25
476	474.5	473	476.5	476.5	483	530.75	576	656.75	676.75	691.75	657.75	684.25	653.5	625	594.5	561	543	527	506.75	525.25	496.25	477.5	487.75	478.5	478.5	478.5	469.25	476.25	501.75	508.25	519.75	523.75	516.25	534.75	527.25	580.25	592.25	592.25	551.75	516.25	516.25	518.25	542.25	551.25	551.25	539	539	534.25	537
2736	2665.75	2606.5	2604.75	2545.5	2364	2241.5	2215.5	2215.5	2231.25	2252.5	2252.5	2230.25	2205.25	2205.25	2143.5	2194.25	2270.5	2359	2385	2462.75	2508	2506.25	2466.5	2511.75	2561.75	2678.25	2678.25	2781.25	2823.75	2889.5	2878	2945	3020	2958.25	2968.75	2963.5	2863.5	2803.5	2831.25	2816	2816	2770	2680.75	2621.25	2621.25	2736.5	2971.25	3129.25	3204.25
3007	3007	3030.5	3112.5	3211.25	3278.75	3324.75	3362	3364.75	3389.5	3403.25	3403	3355.25	3225	3071.5	2947.75	2911.5	2911.5	2995.75	3131.5	3156.25	3167	3119.25	3090.25	3066.25	3090.5	3097.25	3097.25	3078.25	3121	3088.75	3035.5	3035.5	3018.5	3018.5	3039.5	3014.25	3083	3109.25	3112.25	3104.75	3104.75	3079.75	3037.5	3037.5	3019	3054	3088.5	3092	3051.5
50456	50746.5	49177.2	49532.5	51519.5	52685.8	52491.8	53273.2	53016.8	53060.2	51569	53009.2	54244	56068.2	56993.8	58381.2	60234.5	60793.2	61868.5	62648.8	61868.5	61284.5	61208.8	60975.2	60975.2	61556.2	62002	62002	60710.8	58446.8	57620.5	57620.5	59346	61329	63572.2	65901.2	67351	68139.5	68791.8	68791.8	67963.5	66842	66719.8	66497.5	66941	66944.2	66944.2	65698.2	63228.5	60858
1766	1766	1750	1705.5	1644	1608.25	1547.75	1557.25	1484.5	1414.75	1414.75	1411.75	1432.75	1438.5	1446.75	1402	1372.5	1336	1339	1283.25	1283.25	1311.25	1232.75	1208.25	1175.5	1160.75	1160.75	1264.5	1304.5	1375.5	1386	1413.25	1420.25	1453.75	1486.5	1538.5	1576.5	1581.25	1657	1674.75	1675.25	1698.5	1693	1703.5	1780	1794.25	1825.75	1873	1829.5	1776.75
52160	52937.2	53252.2	54151.8	55783.5	57339.8	58146.2	58999.5	58999.5	58288.5	57708	57505	56228.2	55335.5	55610.5	55186.2	54122.2	52583.2	54203.5	54113	51510.8	54155	55631	55733	55629.8	56553.5	56484.8	54959	52452.8	52069.2	52069.2	54253.2	59504	62188.8	62809.5	62809.5	62638.5	62687.8	61911.2	61100.2	60980.8	61172	61008.5	61523.5	62168	62168	61309.5	59699.5	58702.5	57704.2
369	378.75	379.5	379.5	379.5	391.25	409.75	406.5	410.75	384	345.5	315.75	312.25	309.75	309.75	330.75	337	322.25	295.5	324	324	312.5	317.5	330.25	311	311	316.5	329.75	320.75	320	299.75	287	274	260.5	260.5	271.5	302	320.5	326.5	320.5	317	322.5	330.25	313	330.5	343.75	331.5	334	344.5	336.5
7561	7515	7608.5	7699	7699	7722.5	7815.25	7815.25	7869.75	7978.75	8245.5	8160	8323.75	8491.75	8465.75	8417.75	8488.25	8391.75	8391.75	8523	8738.5	8825.5	9018.75	15729.5	29066.5	39334.8	43066.8	42792.2	42719.5	37070	34876.5	34876.5	34858	35183.8	34870	31103.2	21379	14830.8	14830.8	15155	16176.2	19360	21766	22197	22197	22197	21114.8	17654.8	15671.2	15671.2
11363	14329	15109.5	15109.5	14772	13461.8	12236.2	10901	10901	12128.5	12963.2	15024.5	16187.2	16889	16889	17475.5	16899	16789	16218.8	16735	16646.5	16646.5	16088.2	16542.2	16662.5	16836.5	16836.5	16964.8	16046.5	15339.5	14932	14996.8	14752	14247.8	13796.8	13951.2	14200.2	15233.2	16004.5	16004.5	15624.5	15302.8	14719.2	14291.5	13873.5	13753.2	13922	14236.2	13992.5	14428
92	99	100.75	100.75	95	98.5	109.5	112.5	108.75	108.75	84.75	76.5	76.5	82.5	95.25	103.5	105	97.75	95.75	84.5	74.75	74.75	75.5	84	91	95.25	102.25	113.75	314	477.75	613.5	821	793	619.75	619.75	537.75	295	167.75	133.25	133.25	151.5	194	281.5	379	484.25	515.5	570.25	545.5	469.5	302.5
8838	9574.5	10185.5	10491	10491	10440.8	10011.5	9914	9773.25	9818	10122.8	10126.8	10047.8	10078.5	9922.5	9922.5	9922.5	9777.5	9520.75	9382.25	9382.25	9292.75	9052.25	8962.25	8747.25	8747.25	8914.25	9163	9275.75	9383	9323.25	9330.75	9362.25	9457.75	9520.75	9548.25	9663.5	9660.25	9680.25	9649.5	9650	9583.25	9452.5	9230	9074	9074	9147.75	9352.25	9359.75	9401.5
28907	25804.5	20048	17133.5	16592	15988	15619	15155	15155	14978	15472	15138.5	15104.5	14877	14991	14991	15209.2	15443.5	15730.8	15730.8	15759.2	16066.2	15958.2	15632.2	15820.5	15742.2	15683.8	15683.8	15883.2	15871.2	16222.8	16222.8	16139.8	15932.2	15941.5	15809.8	15518	14766	14350.5	13758.8	12462.5	11411.8	10903.2	10160.8	9418.25	9335	9312.5	9847.25	10002	10002
20203	19410.8	19316.2	19316.2	19713.5	20326.2	21401.8	22773.8	23452.2	23452.2	23373	23052.5	22827.5	22827.5	23225.5	23225.5	23064.2	22972.5	22807.2	22670.2	22740.8	22804.2	22804.2	22585.2	22644	22644	22890.8	23565	24099.8	24099.8	24103.8	23743	23175.2	22701	22634.5	22568.8	22982	23247.5	23547.2	23557	23703.5	23982.5	23844.5	23787.2	23814	23814	23690.2	23381	22860.5	22241.2
3379	3191	3191	3072.25	3072.25	3014	2989.25	2879.5	2827	2772.75	2834.75	2774	2777.75	2692	2620.25	2620.25	2637.5	2676	2807.5	2834.5	2834.5	2744	2760.25	2750	2758.25	2704	2826	2725	2741.5	2734	2822.75	2822.75	2843	2841	2773.5	2660	2485	2289.75	2139.5	2139.5	2137.5	2129	2209.75	2306.75	2399.25	2523.5	2523.5	2492	2482.25	2597
4245	4337.25	4409.5	4520.25	4568.25	4550.25	4400.25	4266	4186.25	4186.25	4500	5059	5306.5	5306.5	5154.75	5092.75	5092.75	5097.5	5325.5	5553.5	5721.75	5721.75	5844.25	5985.75	5985.75	6017.75	6017.75	5999.5	5842	5737.5	5496.75	5303	5294.5	5154.75	5078.25	4931.75	4915.75	4915.75	4852.25	4816.25	4790	4678.25	4677.5	4603.5	4603.5	4580	4508	4413	4405.5	4370.75
7012	7457	7679	7769.75	8009.75	8217.75	8492.25	8492.25	8329.75	8200.5	8164.5	8127	8047.25	8047.25	13686.2	24444.2	29658.8	29658.8	28830.8	27789.5	26898.2	26898.2	26920.2	27519.8	27574.5	27574.5	26799.2	25774.2	24364.2	24310.5	25066.8	25082.2	25129	25566	25383.5	25199.5	24703.8	24703.8	24346.8	22723.5	20642.5	19524	18739.5	17753.5	17753.5	17617.2	18152.8	18196	18334.5	18334.5
85398	81230	81230	81816.5	84705	85204.2	85241.2	85405.2	83262.5	83284.2	84917.2	86255.8	86255.8	87019	87379.2	87379.2	87680.5	87894	88675.8	89560.5	89560.5	88572.8	88572.8	87872.8	87983.8	90804.8	92521.5	93341.2	93341.2	91427.8	90604.2	88800.5	87559.8	88743.5	89993	89993	91424.5	93052.2	93052.2	93942.5	94146	93662	93476	93476	92363.5	90366	87677	86226	86226	87009.8
3669	5021.25	5669	5669	5611.75	6066.25	7299.75	10137.8	13680	17325.8	19048.8	19048.8	20825.8	20825.8	21386.2	22327.2	23805.8	23805.8	23788	24255	24139.8	21971	23994	24856.2	24821.2	24821.2	25566.2	25312.2	25312.2	26080.2	28686	30382.2	31127	31127	29521	28446	28144.8	28144.8	30043.2	30381.5	30381.5	30143.8	29985	29985	29892.8	30728.2	30946	30544.8	30334.5	31224.2
22508	21929.5	21929.5	24022.5	28666.2	30232.2	30380	29939.8	29959	29610.2	28705	26285	25360.5	24512.5	23980.5	23535.2	22603	21557	21557	22817.5	24037.2	24037.2	24321.8	22783.5	22077.2	21594.8	21700.8	21789.2	22416.2	22465.8	23794.8	24303.5	23900.5	24695.8	26110.2	26731.2	28445.2	28445.2	29462.8	28456.8	26863.8	24130.5	25717.5	24552.2	24552.2	26124.5	26124.5	25241.5	25290.5	25290.5
14767	16335.5	17937.5	18720.2	18720.2	18522.8	18751	18922.8	18469	18376.2	17454.5	17253.2	17253.2	17891.5	19729.2	22047.5	24495.2	26804.5	28582.5	29567.8	29613.8	29647	29084.2	28941.8	28941.8	29367.5	29395	29857	29762.5	29762.5	29564.5	30445.8	30594.2	30753.2	30100.8	30039.2	29206.8	28365.5	27981.8	27981.8	28084.8	31389.5	38625.8	41996	42284.2	42284.2	41379.8	41179.2	40994.2	40994.2
46471	48868.5	50283.8	51605	53298	55032.5	56025	56025	56072.8	56501.2	56295.8	55569	55745.2	55808.2	55578	55439.5	56073.5	57169.5	58208.2	58640.8	58640.8	58826.5	58018.8	57714	57705	57713	57041.5	57041.5	56486.8	56307.5	56307.5	56346.8	56359.2	56359.2	55690.8	54432.8	54432.8	53587.2	54529	55756.5	56163	56501.8	57531.2	58871.5	60335.8	60816.2	60816.2	60282.5	59287.8	58462.5
24039	24039	24030.5	23918.8	23909.2	23909.2	24177.2	24079.5	24594.5	25071.8	25586.5	26634.2	27409.5	27790	28113.5	28513	28513	28055.5	27351.5	26798.5	26798.5	26853	27399	28273.2	29617	30764.8	31732.2	32617.8	32818.8	32963.5	32963.5	32974.8	32987.5	33524.8	33974.8	34280	34280	34426	34598.8	34683	34730.5	35235.2	35677.8	35990.2	36273.5	36883	49612.5	72289.5	83120.8	83120.8
4993	4970.5	4949.5	4882.5	4902.5	4840	4827	4794.25	4825	4807.75	4824.5	4835.75	4960.75	4960.75	4962.75	4903.25	4798.5	4798.5	4875	4811.25	4752.25	4942.5	4998.5	5063.75	5250.75	5347.5	5448.75	5546.25	5645.5	5733.5	5739	5742.5	5702.5	5684.5	5684.5	5711	5678.25	5546.25	5644.25	5644.25	5572.75	5708.75	5708.75	5615	5613	5647.5	5530.75	5423.75	5448.75	5250
2923	2923	2913.25	3028.5	3261.25	3432	3506.75	3506.75	3530.25	3565.75	3532.5	3487.75	3588.25	3643.75	3528.5	3574	3666.5	3679.25	3618.75	3669.75	3638.25	3479.75	3334.25	3346.5	3317	3376.5	3385.25	3420.25	3420.25	3369.75	3298	3385.75	3475	3533	3607.25	3631.5	3607.25	3581	3579.5	3666.25	6428.75	12626	16002.2	16002.2	15932.5	14027	11659.5	10901.8	10703	10749.5
2643	2582.5	2513.25	2456.5	2447	2377.5	2191.25	2111	2103	2103	2023.25	2049.25	2012.25	1953	1953	2070.25	2244.5	2283.75	2283.75	2126.75	2188.25	2033.5	2031.5	1888.5	1949.25	1949.25	2101.5	2144.75	2158.5	2158.5	2005.5	1903.5	1880.75	1880.75	2144	2330.5	2330.5	2853.5	3060	3126	3599	3815.25	3998.25	4155.5	4182.5	4323.25	4276.75	4273.75	4038.5	3803
10080	11045.8	11903.8	12615.8	13361.8	13789	13946.8	14111.8	14204.2	14249.2	14292.8	14471.2	14769.5	15112.2	15484.2	15615.2	15822.5	15835.5	15641.2	15492.2	15314.5	15314.5	15281.5	15448	15641	15641	15437.2	15208.2	14826	14531	14288.2	13987.8	13697.8	13697.8	13839	14243.2	14323.2	14532.8	14363.5	13926.8	13850.8	13774.2	13450.8	13488.8	13625.2	13625.2	13616.5	13628.8	13628.8	13358.8
6814	7117	7247.25	7678	7817	7953.5	7917	7917	7724.5	7575.25	7539.75	7257.5	7217.75	7381.5	7364.25	7300.5	7056	6271.75	5749.75	5719.5	5479.25	5239.5	5279	5211.25	5211.25	5445	5445	5736.25	5739	5758.5	6023	6170.5	5963	6124	6000.5	6000.5	6286.25	6846.75	7126	7175.25	7175.25	6997.75	6897	6764	6591.75	6752.25	6954	6569.5	6722	6939.25
7080	6927.75	7078.5	7221.75	7332.75	7564	7726	7855.5	7855.5	7612	7287	7240.5	7240.5	7643	8138	8338.25	8385.75	8385.75	8328.25	8243.75	8153	8042	7867.25	7852	7996.75	8024.75	8026.75	8106.25	8008.75	7720.5	7505.5	7425.75	7382	7382	7244.25	7040.25	6796.25	6514.5	6772.5	6520.25	6483.75	6702.75	6742.75	6568.75	6385	5862.25	5525.75	5489.75	5326	5049.75
19478	19838	20502.5	20848.2	20848.2	20870.2	20759	20727.5	20593.2	20701.5	20701.5	20701.5	20301.2	19658.2	19179.5	19130.2	19130.2	19207.2	19307.8	19357	19502	19353.5	19353.5	19198.8	18928.8	18795.5	18795.5	18861	19219.2	19400.8	19407	19605.8	19778.8	19558.8	19501	19353.2	19239.5	18915.2	18915.2	19126	19126	19124.5	19055.2	18621.8	18494	18739.5	18720.2	18954.8	19036.8	19036.8
13336	13108.5	12876.8	12727.2	12532	12391.5	12254.8	12254.8	12395.2	12506.5	12469.5	12358.5	12254.8	12348.8	11800.2	11897.5	12313.8	11858.5	11796.2	11777.2	11825.2	11652.5	11869.2	11869.2	11869.2	11779.8	11394.2	11286.5	11235	11017	10891	11111.5	11111.5	11057.5	11080.8	11160.2	11331.5	11280.2	11228.8	11552.2	11417.2	11311	10788	11434.2	11387.5	12133.5	12509.8	12804.2	13016.2	13338.8
54626	55803	55803	54785	50632.2	45984.5	42801.2	40982.2	40982.2	41382	45447.8	51547.8	55965.2	57740.8	57740.8	57717.8	56363.8	56366.8	56196.5	56865.8	58343	59283.5	59400.2	59400.2	58440.5	57660	56993	56640.8	56802.2	57394.5	57811.5	58444.5	58444.5	58288.5	57425.5	56641.8	56636	57128.5	57786.5	59488.5	60526.5	60935.2	61160.5	61448.5	61842.8	61956.5	62783.5	63457.5	64133.5	64567.2
678	626.5	626.5	578	495.75	529.75	537.5	536.75	577	577	541.25	478	436.25	400.5	400.5	421.75	486.25	547.25	547.25	552.75	554	558.5	521.5	521.5	516.75	516.75	522.75	597.25	694	768.25	768.25	749.75	749.75	806.5	838.25	873.25	873.25	844	755.5	749	716.25	758.5	801.75	801.75	748	795.5	794	794	810.25	817
1976	2044	2102.5	2197	2197	2181.5	2253	2100.5	1944	1866	1903.5	1903.5	1946.5	2060.25	2060.25	1956.5	1761	1760.25	1693.25	1791.75	1890.5	1890.5	1929.75	2046.5	2084.25	1997	2028.5	1906.5	1884.5	1884.5	1998	2074	2074	2110.75	2127.5	2133.75	2145.25	2211.25	2251.25	2193.75	2203.25	2203.25	2165	2123.25	2116	2080	2028	1843	1649.75	1564.25
4318	5315.5	6245	6578	6578	6523.75	6369.75	6104	5927.25	5840.75	5840.75	5906	5890	5785.25	5713	5416.25	5138.5	5101.25	5101.25	5115.25	5294.25	5453.25	5572.5	5732.75	5732.75	5547.5	5555.5	5384.25	5384.25	5281.75	5377.75	5352.75	5382.5	5247	5382.5	5623	5410.25	5501.25	5501.25	5357.25	5251.75	5239.75	5239.75	5365	5332.5	5505.5	5714.25	5863.5	6045.25	6205
37041	36379.8	37864.8	39460.5	40155.2	41569.8	42573.8	43196	43692	44440.2	45963.8	48253.8	49024	48191.2	47820.5	45837	45837	43626.8	43084.5	41987.5	39372.8	37526	36240.5	34766	33160.2	33082	32673.2	33699.8	33699.8	34720.8	34677	34248.5	33684.8	33791.8	32324.5	32098.8	32944.2	32944.2	33472	33843.8	34021	34072.5	34011.5	33647.2	32326.5	31363.8	31363.8	31497.5	31285.2	31254.2
2021	2225.75	2134.75	2083.25	2083.25	2083.25	1890.75	1810.25	1785	1785	1785	1811.75	1917	2076.5	2076.5	1986.5	2090.5	2089	2019	2114.75	2114.75	2030.25	1975.5	1994.75	1994.75	2113.25	2113.25	2211.25	2248.5	2273	2273	2273	2337.25	2412.5	2388	2413	2413	2265	2089	2054.25	2054.25	2094.75	2094.75	2111.75	2081.25	2100	2157.75	2338.5	2452.75	2490.5
7478	7445.5	7511.5	7128.25	6508.25	6809.25	6809.25	6333.25	6857.75	6985.75	7319.25	6563.75	6631.25	6522.5	5592.75	5590.5	6527.75	6727.5	5852.5	5805.5	4430	4245	4212.25	5049.5	5553	5694	5762.75	5853.25	6021.5	6217	6308.5	6346.75	6395.25	6384.75	6534.25	6397.75	6519.5	6803.5	7041.5	7229.25	7725.25	8024	8066.25	8066.25	7773.25	7368.25	7084	7084	6753	6811
4021	4006.25	4023	3986.75	3923.25	3877.5	3868	3867.5	3776.25	3776.25	3636.25	3613.25	3519.25	3443	3409	3443.75	3443.25	3606.75	3712	3731	3794.25	3841.5	3861.5	3861.5	3861.5	3844.25	3810.75	3765.5	3765.5	3781.75	3841.75	3850	3850	3749.75	3710	3646.5	3646.5	3722	3790.5	3872.75	3934.75	3946	3946	3921.75	3839.75	3830	3830	3877	3834.75	3920.5
7010	6867	6867	6724	6697.5	6900	7164	7355.75	7490.25	7490.25	7327.25	7201.25	6998.5	6621	6222	5973	5973	6097.75	6196	6347.25	6348.25	6427	6346.75	6346.75	6404.25	6414	6430.5	6430.5	6490.25	6454.5	6465.25	6355.25	6268	6151.25	5904.5	5661.75	5499.75	5406.25	5333.25	5268	5150	5150	5035.5	4933.75	5033.25	5172	5108.25	5232	5385	5532.5
90912	88308.2	85315.8	80872.2	77827.2	75953	73270.2	70820.8	70458.5	69592.2	68385.8	68194.2	66381.8	64053.2	62171	60539.5	59026.5	57777.8	56974.2	55877.8	54094.2	51761.8	48369.5	44983	42470.2	39550	39061.2	38793.8	39427.8	40707	42157	42280.5	44047.8	44575	44641.5	44641.5	45167.5	45493.2	45493.2	45295	45789.8	46346.8	46829.5	49074	49493.2	50006	50883	52006	52627	58089.5
37896	38136.2	38218.5	38136.5	37470.5	37470.5	36960	35755.8	35675.8	36963.2	37282.5	38388.8	38388.8	37588	35153	33544.5	33011.8	33116	33116	34042.8	34884	35647	36738.2	37415.5	37415.5	37308.2	36149.2	36149.2	35887.5	36326.5	37607.5	37607.5	36739.5	36796.2	36237.2	35848	35807.5	35120.2	34824	34484.2	34396.5	34679.5	34679.5	34129	33214	32097	32007.5	32007.5	32095.2	32526.2
4866	6033	7304.5	8444.25	8889	9009.25	11543.5	16384.5	19389.2	20191.2	20191.2	22907.5	26335.2	28711.5	29017	28749.5	28749.5	28749.5	28902.8	29167.2	29376	29206.2	29245.5	29071.2	28856.2	28376.2	27580.5	26832.8	26280.8	24873.5	23248.8	22213.2	21781.2	22181	22832	23288.8	23943.8	23943.8	23244.5	22049.5	20841	20429.5	19767.8	19659.5	19794.2	19998.2	19608	19363	18277	17621.5
8209	7781	7660.5	7660.5	7552.5	7526.75	7469.75	7212.75	7166	7223	7183	7166.5	7112.75	7112.75	7212	7497.75	7597.75	7597.75	7586.25	7463.5	7188.75	6930.5	6890.75	7013.5	6985.25	6904.5	6998.5	6852.5	6629.25	6492	6533.75	6377.25	6508	6577.25	6623.75	6670.75	6682.25	6873.25	6724.75	6783.25	6778.75	6785.5	6645.5	6649	6570.25	6480.75	6461.5	6521	6617.5	6703.25
35459	37906.5	38456.2	38456.2	38738.8	36832	36832	38118	38988	40269.5	41803.8	41803.8	40876.8	42137.8	42019	40562.5	38658.2	37997.8	37774	36554.2	37866	38575.5	38287.2	38729	40323.2	40347.8	38915	38749.5	36748.5	36748.5	36919.2	37524.8	38126	38943	39376	39386.8	40356.5	41450.5	42991.2	44133	44868.5	45453.2	45163.2	45163.2	44693.8	42996.5	41259	40777.2	40423.5	40358.8
22348	23001.5	23366	23366	23246.8	23246.8	23585	23348.5	23348.5	22828.5	21982	21605.2	21326.8	21605.2	21705.2	21410.8	21294	20928.2	20135.8	19621.5	19093.2	18875.5	18549.8	18357.8	17732.5	16788	16054.8	15490	14697.8	13606.2	12723	12620.8	12620.8	13334	14423.8	14980	14980	14851	14112.8	13778	13379	13379	14137.5	14137.5	14888.8	15963.2	15680.5	16442.5	17406.5	17406.5
53333	53913.5	53913.5	54342.2	54342.2	53824.8	50957.8	50957.8	51556	50008.5	53312.2	54299.2	53070.2	51802.8	51891.5	50671.2	50665.5	50665.5	50665.5	50435.8	50983.2	49636	49636	51592	51592	52200.5	53728.5	53533.5	53433.2	53433.2	52434.2	49942	48585.5	48585.5	48697.5	48697.5	48013.2	46934.8	46575.5	46422	46849.5	48761	49371	51783.2	53856.8	55786	57440.2	58444.8	58810.5	60045.8
28999	28745.8	28745.8	28979	29340	29257.5	29853	29409.5	29764.2	30667	31320.5	30921.2	30943.2	30145.8	29457.8	29457.8	29457.8	29523	29056.2	28927.2	28893.2	29154.5	28750.5	29154.5	29661	29656.5	30219.5	31231	32589.5	32700	32700	32601	31816	31823.5	32920.2	33233.2	32998	32998	32510	31864	31781.5	31781.5	31781.5	31069.2	30804.2	30581.2	30581.2	30270.2	31176.5	31403.5
8419	8864	9358.75	10032	10399.2	10670.8	11177.5	12012	12153.8	12153.8	11999	11672.2	11206	11207.5	11631.2	11569.8	11713.8	12057.5	12432	12535	12535	12422.5	12185.8	12185.8	12261.5	12707	12992.2	13205.5	13205.5	13205.5	13266.2	13460	13576.5	13576.5	13330.2	12902.8	12600.5	12511	12589.2	12589.2	12687.8	12853.2	12853.2	12634	12455	11825.5	11821.2	11992.8	12278	12321.5
17034	19704.5	20733	20990.2	21508.8	21724.8	21918	22161.5	22161.5	21549.5	20913.8	20708	20708	21132	21128.8	21336.8	21693.8	21648.2	21691.2	21821.2	21821.2	21365.5	21391	21181.2	21099.8	21268	21438.8	21481	21492.8	21732.8	21905.5	21989.5	22056	22056	21973.8	21741.2	21541.5	20395	19768.5	20867.2	19603	18262.8	19041	18825.8	18825.8	19423	19423	19820.2	20335.5	21068
4023	4042	4074	4074	4080	4126.5	4185.5	4174.5	4231.5	4295.75	4335	4280.75	4253.5	4267.5	4153	4136.75	4208	4244.75	4214.5	4214.5	4160	4076	4074	4037	4081	4096	4096.25	4067.75	4067.75	4067.75	4076.5	4073.75	4022.75	4018.25	4018.5	4021	4021	4111.75	4123.75	4043.25	4038.5	4038	3930.25	3867.75	3854	3846.75	3782.5	3745.75	3608	3448.75
3543	3540.75	3495.25	3510.25	3622.75	3780.75	3898	3898	3972.25	4042.75	3892.5	3736.5	3915.25	3911.5	3704.25	3872.25	3985	3998	3919.5	3919.5	3957	3910.5	3868.25	3908.75	3928	3908.75	3649.75	3167.5	3059.5	3007	3136.75	3172.25	3302.5	3203.5	3151.75	3115	3072.75	2945.5	2864.25	2864.25	2881	2928	3034.75	3034.75	2958.25	2756.75	2620	2482.25	2466.5	2324
13721	14957	14957.5	14969.5	14978	14241.5	13909.5	13892	14293.5	14226.5	14540.5	15407.5	16902	17816	17924.5	18055.5	18272.5	18055.5	17715	17896	17884	17884	18220	18440.5	18473.5	18801	18798.5	18940.5	19019.2	19343	19333.8	19640.5	19887.8	19931.2	19994.2	19994.2	19986.8	20099.2	19996.2	19731.5	19731.8	19712.8	19609.8	19535	19528	19421	19412	19444	19490	19490
28115	28115	28392.5	29217.5	29390.5	29354.5	29354.5	29186	28903.8	29025.5	29273	29273	29268	29281.5	29275.5	29275.5	29277.8	28984	29287	29691.2	29550.8	29818.5	29818.5	29763	29640.2	29479	29022.8	28842.2	28386.8	28143.8	27885	27885	27607.2	27412	27117.2	27075.5	27075.5	27162.5	27583	28229.8	29005.2	29193	29193	28776.2	27164.8	25290.5	25021.5	25021.5	26654	27771.8
305	277.25	262.25	241.75	215.25	195.75	202.5	202.5	199.25	199.75	205.75	210.25	213.5	233	234	236.75	228	222.25	219.25	225	221.75	232	225.5	236.25	233.75	237.25	233.25	243	243	246.5	254	254	246.25	246.25	245.75	245	249.75	249.75	240	230.5	224.5	220.5	224.5	224.25	211	180	157.25	153.25	153.25	165.25
20969	20527.5	19793	19630.5	19097.8	18571.8	16858.5	14196.8	12607	12607	12833.8	12861.2	13030.8	13176.8	13286.8	13498.8	13614.2	13697.2	13718.8	13685	13685	13612	13368.2	13097.5	13040.2	12981.8	12921.8	12848.5	12816.5	12816.5	12996.8	13268.2	13473.2	13563.2	13535.2	13464.8	13459	13463.5	13375.8	13433.2	13327.2	13234	13026.5	12786.5	12513	12396.8	12402.2	12402.2	12429.8	12636.8
5503	5379.5	5419.5	5327.5	5327.5	5433.5	7284.25	10741	12403	12403	12279	12021	11687.2	11466.5	11433	11277.5	11278.8	11081	10886	10804.8	10841.8	10794.2	10710.2	10619.8	10390.2	10390.2	10441.2	10721	10659.5	11046	11040.8	11333	11560	11911.5	12220.5	12415.5	12415.5	12434.2	12164.5	11829.5	11528.5	11276.2	11217.8	11217.8	11246.5	11331	11331	11205.5	11205.5	11116.2
29746	29549	29549	28521.5	27319.5	27319.5	27425	28626.8	29943.5	30886	31523	31652.2	31652.2	30498.5	28362.8	27365.2	27365.2	28084	28869.2	29109.5	29215.2	29450	29500.8	30131.8	30576.2	30885	31231.8	31299.5	32135.2	32616.8	32880.8	33333.5	34642	36688.8	38320.2	39486	40401.2	40949.2	40949.2	40513.8	40127.5	40434	40507.5	41829.8	43223.8	44620.8	45315.8	45315.8	45539.2	45590.5
1586	1862	2147.75	2318.5	2598	3087.75	3426	3490.75	3490.75	3459	3386.25	3386.25	3301	3227.5	3273.25	3282.5	3282.5	3401.25	3510.75	3596.5	3621.25	3668.5	3808	4146	4268.5	4346.5	4391.5	4508.5	4454	4425.5	4146.5	3963	3952.5	3902	3873.5	3906	3896.5	3726.75	3810.75	3765.75	3765.75	3998.25	4164.5	4226.25	4226.25	4048	3980	3783.5	3783.5	3978.5
478	461.25	461.25	440.25	422.75	408.75	416.75	398.5	392.5	375.75	382.75	365.5	382.75	377	389.75	392.75	402	392.75	387.75	373.75	359	359	374	371	364.5	359.75	340	328	337.75	322.25	334.25	341.5	332	314.25	320	296	275	286.5	272	271	280.25	281	289.5	307	313.25	301.25	301.75	301.75	304.5	289.5
2915	2979.75	3101.75	3171.5	3249.25	3270.5	3254.5	3217	3205	3141.25	3089	3075	3099.5	3124.25	3101.5	3190.5	3299.25	3296.75	3309	3309	3247.25	3236	3178.25	3073.5	2990	2933.25	2924.5	2924.5	2878	2782.25	2946.75	2852.75	2824.25	2846.75	2967.25	2967.25	3087	3150.75	3150.75	3171.5	3171.5	3147.25	3146.25	3172.5	3133.75	3069	3153	3254.25	3358.75	3450.5
28522	32010.8	33780.2	34771.2	35134	35819.2	35819.2	35168.2	34591.5	35176.5	33747	33653.5	32018	30653.5	30653.5	31251.2	34387.5	35455.5	35847	35597.5	34888.2	34816.2	34834.8	34270.5	34823.5	34499.8	34499.8	40522.5	52668.2	59048.2	59048.2	58581.8	56443.2	53112.5	52246	52727.5	51384	54154.2	54188.2	56555.8	54527.8	54527.8	51979.2	53138.2	53138.2	53934.8	56172.8	57919.5	58046.8	58046.8
317	296.25	275	253.5	246.75	236.5	235.5	232.5	232.5	222.75	219.75	211.5	211.5	216.5	212.25	197.25	215.5	200.5	204.5	201	209.25	204	211.25	200.5	208	206.5	199.5	195	199.5	195	197	204.75	204	209	218.75	219.25	215	215	215	218.75	2997.75	7942.75	10660.2	10738.5	10395	10094	10095	10021.5	10021.5	10087.2
32890	33412	34651.8	35787.2	36941.8	37483.5	37483.5	38057.8	37228.5	36607.8	36125.2	36688	36125.2	36591.8	36604.2	36852.8	36342.5	36547	36091.8	35768.5	35768.5	36113	35386.5	36198.5	36684.5	36729	36794.2	36794.2	36103.2	35047.8	34854.5	34854.5	35363.8	36322	37288	37345.5	37252.5	37252.5	36810	36293	35730.2	34818.2	34028.5	34028.5	34433.8	34575.8	34014.2	35294	35359.5	35723
42863	41596.8	39976	39134	38966.8	39134	39484.8	39904.8	39763.2	39527.2	38794.8	38004	38004	38176	38629.8	39078.2	39624.5	39498.2	39893	39630.8	39133.2	39133.2	39386.2	39347.2	39260.5	39260.5	38487.5	38641	38349.2	38529.2	38909.5	39065.8	38899.2	39065.8	39109.2	39148	39226.5	39548.8	39487.5	39487.5	39494	39436	39131	38496.2	37178	36257	35728.2	35406	34978	33651.5
32386	32338	32338	34957.8	39534.8	41019.2	41181.5	39631.8	38613.5	37519.2	36707	36456.8	37185.2	37725.8	37764.2	38210.2	39208	39205.5	38845.8	38845.8	37646.8	34001	32410.5	32410.5	32600.2	33077.5	33153.2	33743.8	33295.2	32888.5	33320.2	35512.5	37006.5	38671.8	39203.8	39216	38963	39511.5	39821.5	39821.5	40133.2	41176	40466	41636	41750.8	42737	42659.2	43645.8	44179.8	44179.8
12845	13173.2	13495	13771.8	13771.8	13643.5	13513.8	13442	13294.2	13029.5	12759	12615.5	12615.5	12615.5	12476	12408.2	12467.2	12467.2	12778	13132	13132	13094.5	12809.2	12730.5	12410.2	12234.2	12431.2	13057.5	13106.5	13612	13778.2	13811.5	13764.8	13848.5	13887	13785.2	13492.2	13522.2	12999.2	12447.2	12403.5	12322.8	12322.8	12542.5	12753	12920.5	12929	12905	12905	12547
69283	71106	72554.8	73064	74596.2	75332	77664.8	77226.2	77974.8	77927.8	77927.8	77430.8	76416.5	74783.2	73838.8	72967	72039	71424	71482	71482	72852.2	73800.2	74229.8	74229.8	74364.8	74268	74260.2	74260.2	74385	73885	73861.2	72830.2	72500.5	71855.8	71873.8	71062.2	71320.8	70966.2	70968.5	70827.5	70969.2	71252.8	71006.5	71734	72130.8	71977	71968.8	72113.2	72014.5	71652
16335	16335	16477	16708.5	16961.2	16961.2	16521	15699	15773.2	15773.2	16458.2	16386.5	16434.5	15265.2	14604.5	14350	14399.5	13968.8	14041	13903	13400	11914.5	10722	10495	10235.8	10408.2	11132.2	11809	11744	11744	11740	11135	10512	10725.5	10772.2	10772.2	10456.2	10949.5	10346	10267.8	10267.8	10661.2	10844.2	11618.5	12086	12536.5	12611	12900.5	12949.8	12748
2867	2850.5	2850.5	2819	2809.75	2793.25	2805.75	2756.25	2745.5	2754.25	2729.5	2708	2708	2691	2644	2635.5	2685.75	2661.5	2712	2759.5	2823.25	2826.25	2826.25	2774	2742.25	2685.5	2682.25	2702.25	2669.75	2639	2611.5	2564	2506.75	2535.75	2541.75	2515.25	2515.25	2554.25	2642	2760.75	2812.75	2854.5	2862.5	2862.5	2782.5	2707.75	2671	2671	2717	2732.5
3632	3593	3554.75	3408.25	3334.75	3340.25	3282.25	3194.75	3180	3025.75	2906	2777	2597.5	2537.75	2537.75	2644.5	2879	3003.25	3029	3013.75	2981.75	2790.5	2523.5	2372.5	2346.75	2276.5	2276.5	2366.5	2400.75	2427.75	2470.5	2470.5	2455.5	2511	2600	2712.25	2722.5	2722.5	2791.75	2782	2709.5	2682.5	2681.25	2478	2249	2225.25	2225.25	2374.5	2538.25	2721.25
15982	16741	17087.5	17087.5	17087.5	17234.5	17261.2	17049.5	16948.8	16114.8	16114.8	17171	19758.2	21309.2	21818.8	22151.8	21983	22358	22718.2	23233.5	22956.2	23344.5	22755	21746.8	20966.2	20850.8	20738.8	20555.5	20243.2	19656	17952.8	15943.2	13606	11536.8	10874.2	10111	10149.2	9531.75	10943.2	12069	13728.2	14126.2	14470.8	14334.2	14256.5	14141	14076.5	14076.5	14488	13671
78896	79184.2	81511.2	83579.5	83136.5	85076.2	85379.5	85743.5	86944.8	87688	87688	86466	86466	85669.5	83789	84646.8	85417.2	85271.5	85290.8	85290.8	83984.2	81198.2	79991.5	79991.5	80556.5	80556.5	80986	82446.5	84616.5	84374.2	85366	85637.2	85366	84884.5	84286.8	83380.2	82464.5	82312.8	81046.5	79838.5	79244.8	79244.8	79577.2	81153	82191.2	82736.2	83439.2	83931	83931	84610.5
7585	7469.75	7510.75	7542.5	7513.25	7690	8064.5	8351.75	8574.25	8704.5	8848.5	9112.5	9204.5	9331.5	9266.25	9278.75	9267.75	9267.75	9245	9147	8932.5	8688.25	8453.5	8077	7994.25	7854.5	7715	7298	7199	7199	7511.75	8043	8278.25	8334.5	8437.5	8423	8475	8599.5	8657.5	8536.5	8593.5	8655.75	8611.25	8611.25	8798.25	9023.5	9235.5	9305	9305	9342.5
58688	52947.2	49183.2	47421.8	46389.2	44917.2	43342.2	42419.5	41822.2	41222.2	40879	40695.2	40533	40533	40606.8	40511.2	40388	40069	39853	39668.2	39371.5	38973	38973	38691.5	38527	38527	38673	38673	38562.8	38859.2	38248	37870	37885.2	38107.2	38107.2	38492.8	38958.2	39273	39457.2	39457.2	39719	40181.8	40482	40634.2	40467	40436.2	40080.2	40032.5	39784.8	40047.8
11513	10222.5	9441.5	9441.5	9203.75	9203.75	9066	9061.25	8750.75	8418.25	8332	8265	8234.25	8229.25	8241.75	8172.25	7869.5	7869.5	7074.5	7192.5	8247.5	9083.75	9056.75	9056.75	8587.75	7935	7822	7822	8139	8665.5	9101.25	9101.25	8964.75	8384.25	8042	8042	7938	7794.5	7796.25	7962.75	7756.5	7861	8183	8367.5	8461	8654.5	8806.5	8933.25	9056.75	8964.25
43024	43365	44104.2	45027.5	47133.8	48969	50973.5	52523.8	53815.8	53815.8	54909.2	54909.2	56009.2	56637.5	57330	58690	58690	57342.5	56155.8	55843.8	54866.8	55452.2	56789.8	56789.8	56625.2	57555	57555	57440.5	58115.2	58876.8	60306.2	60560	61916.2	63113	64830.2	64999.5	64999.5	57980.5	57390.8	57390.8	59166	68695.2	73068.2	75624.8	76648.2	77271.8	78251.5	78431	79367	79436.5
38066	33743	31452.5	30901.2	30254.8	28989.2	28172.8	28077.8	28077.8	28193.5	28249.2	28249.2	28326	28184.5	27793.8	27655	27746	27519.8	27263.5	27078.5	26984	26984	26616.2	26979	26947.2	27013	27013	27089.5	27262.5	27262.5	26930	26751.2	26874	26683.8	26874	27092.2	27256.2	27165	27392.8	27553.5	28025.2	27984	27984	28002.5	28076	28128.2	28382.2	28475.2	28764	28751.5
70843	62760.5	57687.5	55217.5	53909.2	52795.2	52027	51810	51499	51548.5	51834.8	51602	51703	52210	52095	51523.8	52005.5	52011.2	51275.8	50873.2	51823	51821.5	51776.5	51953.5	52156.2	51835	51347	50989	50898.8	50730.2	50730.2	51161.8	51908.2	52273	52566	52308.2	52008	51120	51038.5	50901.2	51139.2	51139.2	50997	50550.8	50260.5	50260.5	50538	50883.8	50914.8	50997.2
36355	30355	23719.5	16680.2	12857.2	12519	12519	13155	13254	13365	13484	12986.5	12294.8	11836.2	11381.5	11212.5	11212.5	11373.2	11178	11189.8	11138	11236.5	11040.5	11157	11157	11182.5	11033.8	11083.2	10955	10728.2	10740.2	10885	10748	10799	10957.8	11068.5	11001.5	11030.2	11123.8	11114	10849.5	11000.8	11084.8	11019	10651.2	10467.8	9973.5	9546.5	9313	9443.75
7741	3984.25	2630.5	2506.5	2473.75	2434.5	2470.5	2583.25	2575.5	2521.75	2612	2462	2462	2564	2602.5	2625	2666.75	2696.25	2656.5	2656.5	2639.5	2665.5	2649.75	2695.5	2699.5	2699.5	2733.5	2848	2767.5	2747	2978.5	3310.75	3699.75	4114.75	4355	4114.75	4087	4066	3892.5	3742.75	3718.75	3622.75	3611	3695.25	3865.5	4050.25	4248	4307.5	4333	4337.75
14968	9602.75	7576	7312.25	7339.5	7196.5	7170.75	7128	7050.5	6756.25	6565.75	6396	6315	6214	6155.25	6065.5	5918.25	5913	5948.25	5954.25	6044.75	6100.75	6135.25	6101.5	6054.75	6057.25	5990	5990	5953.25	5823.75	5697.75	5566	5392.25	5363.75	5363.75	5549	5835.5	6003.75	6133	6215.5	6388.5	6718.25	6862	6978	6978	6847.25	6721	6717.25	6542	6473.5
25652	22472	21484.8	21069.5	21188.8	20948.8	20844.2	20844.2	20849.2	20827.2	20678.8	20212.2	19891.5	19891.5	20114.8	20246.2	20642.5	20769.5	21139.8	21160.5	21414.5	21524.5	21524.5	21638.5	21638.5	21753.2	21769.2	21874.5	24815.5	29961.5	32819.2	33106.5	32762.5	32457.8	32619	32337.2	31949.8	31707.2	31716.8	31716.8	32095.2	32480.5	32899.2	33217.5	33376.2	33357	33616.8	34055.5	34101.5	34430.5
20925	17355	16221	16040	15949.8	15884.2	15992.5	15992.5	15977.5	16036.2	16120.8	15929	15775.8	15746	15679.2	15503.2	15316.8	15312	15197.2	15085.2	14957.5	14925.5	14845.2	14861.5	14731.5	14899.5	14872	15022.8	14947.8	14952.2	14968	15107	15042.5	15164.8	15289.5	15263.8	15154.8	15063	15000.5	14891.8	14891	14956.5	14956.5	14956.5	15028.5	15121.5	15218.8	15259.8	15348.8	15425.8
77116	72517	71385.8	70566.2	71176.2	71162.2	70295.8	70295.8	69373.8	68976.5	69497	69283	67711	67051.5	65202.8	65202.8	66206.5	64508.8	61110.8	61110.8	58409.2	58409.2	59006.8	60974.5	63462.2	64000.8	64000.8	63136.2	62946.2	60777.8	61713.2	64187.8	65350.5	63593.2	67593	68458.8	69332.2	68629	69790	71534.5	73636	74681.2	74681.2	74681.2	76227.8	78986.5	81615.8	83130.2	83967.2	84628
22963	20504.8	20245.2	20119.2	20652	20652	20363.2	20025.5	19367.8	19367.8	20269.2	20512.8	20396.2	20396.2	19757	19419	18947.5	18547.8	18504	18860	19117.5	19889.5	20056	20195.2	19948	19518	19050.8	19190	18780	18780	18658.8	18594.5	18594.5	18929.2	19673.2	19763	20075	19833.5	19332.5	19033.5	18961	18624	18624	18699.2	19313.2	19227.2	19328	18928.5	18401.2	17999
27267	22644.2	21115.2	20692.5	20576.5	19983.2	19252.2	18893.2	18601	17732.2	16939.2	16103.5	15823.5	15823.5	15673.5	15134.5	13941.5	13229.5	13106	12795.2	12402.2	12232	12479.2	12527	13208.8	13630	13970.5	14770.8	15071.8	15408.8	15987.8	16511.2	16436.2	16436.2	16135	14513	13460.5	13091.5	12932.5	13091.5	13336.2	13922.5	14391.2	14391.2	14275.5	14177	13704	13315.8	13396	13396
6666	1959.5	389.75	363	311.75	289.25	284	279.25	284.25	279	271.25	271.25	263.5	257.25	242.5	226.75	220.75	219.25	220	220.25	219	217.5	214.75	214.25	209.75	209.75	209.75	223.75	234.5	235	227	235	227	232.25	227.75	241.25	220.25	230	232.75	262	257.25	263.5	272.75	272.25	267.25	265.5	274.25	265.5	262.25	271.75
5646	2624.5	1576	1510.25	1519	1519	1416.75	1394.25	1384	1353	1395.25	1435.25	1428.5	1422.75	1449.5	1422.75	1369.25	1317.75	1341.75	1341.75	1343.75	1343.75	1296	1213.75	1213.75	1194.75	1261.5	1261.5	1341	1298	1352	1352	1355.25	1362.25	1464	1607	1586.25	1520.75	1286	1086.75	1083	1108.5	1155	1084.75	1103.5	1037.5	965.5	949.5	955.25	953
1848	1521.25	1458.5	1320.75	1248	1329	1530.75	1593.5	1693.25	1772.25	1767.25	1799.25	1684.75	1650.25	1537.5	1453	1399	1372.75	1344.5	1347	1247	1129.25	1073.75	994.5	950.5	907.25	942.25	977	989.5	1039.75	1039.75	1032	925.25	914.5	835.75	855	990.75	1067.25	1057.5	1057.5	976	883.75	789.25	703.5	635.25	578.5	530	495.5	495.5	512.5
21386	20637.8	20637.8	20496.2	20688	20985	21486.8	21536.2	21584	21840.2	21840.2	21502.2	21655.5	22043.2	21813	21722.2	22106.8	22311.5	22459.5	22964	23351.2	23532.2	23532.2	23490	23546.5	23509.2	23738.8	24069	24201.2	24001	23964.2	23322.2	22367.8	22060.8	21730.2	21269	20641.8	20214.2	20074	19817.2	19095.5	18516.5	18332	18332	18516	18841.5	19505.5	20615.5	21992.2	22794
22632	23734	24745.2	25386.5	25420.5	25785.5	26077	26139	26402	26758.2	26758.2	26570.2	26254.2	26258.8	26205.8	26300.2	26416.5	26456	26456	25965	25557.2	25938.8	25955.8	25817.8	26085.5	26085.5	26085.5	26396.8	26566	27029.8	27274.5	27569.2	27583	27607.2	27832	28223	28232	28655.2	28733.2	29068	29166	29317	29335	29514.5	29514.5	29514.5	29890	30536.2	30967.5	30765
53698	58078.2	61100.8	63701	65474.2	66677.8	67713.5	68977.5	70115	71128.8	71128.8	70113	70113	69966	68551.5	69571.2	70091	70091	69403	69368.5	69398.5	68796.5	67491	67447.5	67447.5	66472	65472.5	65475.5	65694.5	65781	67376.5	68442.5	67895	67480	68547.8	67922.8	67922.8	68904.2	70025.5	70333	70333	70108.2	69099.2	69099.2	69543.8	69048.2	69398.2	70840.5	70920.5	69310
9818	9815.5	10085.8	10608.8	10792.5	11410	11718.8	11757.2	11810	11936	12277	11952.2	11987	11804.8	11616.5	11229	11322.2	11296.8	11406.2	11406.2	11590.2	11629	11526.8	11686.2	11499.2	11447.8	11350.8	11350.8	11350.8	12546	12387.5	12424	12424	11078.8	10706.2	10577.8	10577.8	10544.8	10804.5	11123.2	11529.2	11445	11559	11640.5	11756	11793.5	11800.2	11895	11979.8	12020.8
44438	44558.2	44878.5	45264.5	44675.8	44675.8	45130.8	45963.8	47324.2	50010	53976.8	55023.8	55551.5	55057.2	54070.2	53973	54657.5	53429.8	50484	53580.2	52676.8	50700.2	51751	51751	49483.2	46474.8	44942.2	44444.8	43676.8	43676.8	44921.2	45951.2	46646.2	46646.2	46646.2	45877	45406.8	45833.8	45894.8	44842.8	44843.5	45327.2	44791.5	44954.2	44954.2	46562.8	47825.8	48629.5	47537	48731
4642	5303.25	5686.25	5987.5	5980.5	6112.75	6112.75	6107.75	5934	5934	5917	5971.5	5971.5	6072.5	6014.75	5992	5937.25	5934.25	5804	5664.75	5548.5	5542.5	5538.75	5538.75	5458.25	5331.75	5200.5	5106	5106	5171.25	5426	5421	5566.75	5472.25	5548	5349.5	5349.5	5141	5044.25	4952.25	4762.25	4768.75	4762.75	4684.75	4647	4715.75	4663.75	4536.5	4388.75	4402
13615	14878.5	15894.5	16626.8	16780.5	16685.5	16853.2	17281	16853.2	16811.5	16975.2	16771.8	16653.5	16861.5	17158.2	17280.8	17565.2	17565.2	17565.2	17599.2	17734.5	17926	18256	18118	18388	18586	18566.8	18566.8	18566.8	18441.8	17935.5	17400.5	17249.2	17249.2	17278	17235.8	17235.8	17020	16980	16662	16662.2	16250.2	16011	15477.2	15752.5	15921	17140.5	17582.5	17582.5	17239.8
718	557.25	521.25	467.75	440	467.75	481.5	439.75	455.5	456.75	442.25	422.75	438	402.75	374.75	353.75	357.25	357.25	341.5	333.75	337.75	312.5	295.5	304.25	310.75	292.75	301.25	304.5	314.75	342.25	398	388	432.25	466.75	462	427.75	477.75	471.5	477.25	459.75	481.5	440.5	411.5	411.5	411.5	407.75	425.5	464	504	565
1865	2034.75	2170	2303.75	2346.75	2346.75	2274.75	2189.5	2189.5	2193	2193	2138.75	2280.75	2160.5	2030.25	1993.75	1908.75	1854.5	1779.75	1741	1745.5	1771.75	1747	1776.5	1830	1925.25	2041.25	2140.25	2144.25	2201.25	2187.5	2212	2199.75	2199.75	2144.5	2107.25	2050.5	2050.5	2174.5	2291.5	2272	2191.25	1886	1771.25	1771.25	1902.25	2144.5	2183.5	2384	2400.25
3084	3100.75	3100.75	3099	3099	3107	3102.75	3112.25	3112.25	3112.25	3134	3115.25	3097.25	3187.75	3090.5	3029.5	3029.5	2975.5	2975.5	2906.25	3006.25	2931	2919.5	2905.75	2905.25	2905.25	2873.75	2838.75	2645.75	2583.5	2567.5	2558	2577.25	2597.25	2617.5	2639.75	2680	2639.75	2631.75	2568	2503.75	2448	2378.5	2366	2367.5	2355	2473.75	2516	2659.25	2699.25
3447	3501.5	3442	3387	3400	3400	3539.75	3883.25	3961.75	3961.75	3909	3891.5	3891.5	3998.75	4122.75	4122.75	4091.5	3940.25	3763	3561.25	3128.75	2587	2189.5	2046.75	1918.5	1654	1451.25	1385.5	1382.25	1364	1358	1283	1291.75	1298.5	1375	1529.5	1649.25	1645.75	1713.5	1737	1678.25	1701.25	1792.25	1839.5	1733.25	1868	1869	1737.25	1745.5	1884.25
26476	26251.5	26251.5	25829	25854.5	25372	25146.5	24441.5	24157.8	23844.5	23844.5	23622.8	23327.8	22648.8	22351.8	22351.8	22697.5	23939	24951.5	24983	25316.5	25237.8	24881.2	24659.2	24659.2	24442.8	24297.8	24355.2	24188.2	23963.2	23560.8	23232	22804	22227.8	21827	21827	21863	22090.2	21972	22208.8	22173.8	22347	22356	22356	22384	22178.2	21854.8	21773	21773	21746
8116	9098.75	9402	9674.25	9674.25	9674.25	9761.25	9988.75	10103.2	10254.2	10555.2	10835.5	11054.5	10913.8	11054.5	11011	11205	11020	11253.8	11253.8	11518.8	11768	12101	12399.2	12612.5	12728	12612.5	12648.8	12852	12900.5	12680.5	12582.5	11986.5	11754	11644.2	11446.2	11604.8	11369.2	11358.2	11717.5	11921.2	11858.2	12067.5	12074.5	12026	11870.2	11857	11546.8	11563	12074.2
22972	22940.8	23124.8	23343.5	23890.5	24245	24245	24230.2	24000.5	23719.5	23425.5	23308	23177.2	22538.2	22396.8	22576.5	22358.2	22810	22810	22305.8	22362.8	24509.5	26714.5	28563.2	28563.2	27721.5	25159.8	20800.8	19498.5	19429.8	20474.5	20881	20881	20810.5	20301.2	19858	19550.5	19918.2	19918.2	19655.5	20631	20820.2	20006	19392.8	19810.2	19810.2	20102.2	20614.8	20919.8	21023
5031	5464.25	5630.25	5630.25	5534.75	5622.5	5662	5662	5762.5	5905.5	5978.25	5945.75	5695	5822.5	5456.25	5180.75	5106.75	4846.25	4589.25	4460.5	4460.5	4473.25	4548.25	4548.25	4418.25	4431.5	4279.5	4021.25	4089.75	4230.75	4089.75	3940	3814.25	3756.5	3756.5	3703	3810.75	3923	4196.75	4570.5	4812	4821	4918.75	5020.5	5163.5	5385	5622.25	5622.25	5515	5195
26396	26396	26407.2	26613	27275.5	28161	28457	28457	28212.2	28212.2	28246.2	28559.5	28898	29078.5	29076.2	28947	28896	28896	28582.8	28677.5	28687.5	28543.8	28329	28021	28021	27875	27815.2	27811.5	27624	27624	27605	27530.2	27349.5	27771	27771	28174.2	28930.5	29362	29814.2	29814.2	29268.8	29068	28757.5	28667.2	28668	28980.8	29518.2	29774.2	29774.2	29499
547	496	433	423.25	395.75	389.5	348.5	299.5	286.75	271.75	289.25	300	328	320.25	344.25	319	289	294	323.75	311	329.75	329.75	321	324	322	322	339.25	354	379.5	461.5	502.75	502.75	496.25	418.75	359.25	356.25	342.75	350.5	385.25	409	427	448.25	473.75	506.5	543.25	597	631.25	639.5	649.25	636.75
[truncated: 1,950 more columns]
