# Supplementary material for: Intracellular growth of Mycobacterium tuberculosis after macrophage cell death leads to serial killing of host cells
Source: eLife journal article supplement (doi:10.7554/elife.22028), 2017-01-28
Supplement: supp [file elife-22028-supp-v1.zip › elife_poa_e22028_Figure_5_figure_supplement_1.pdf]

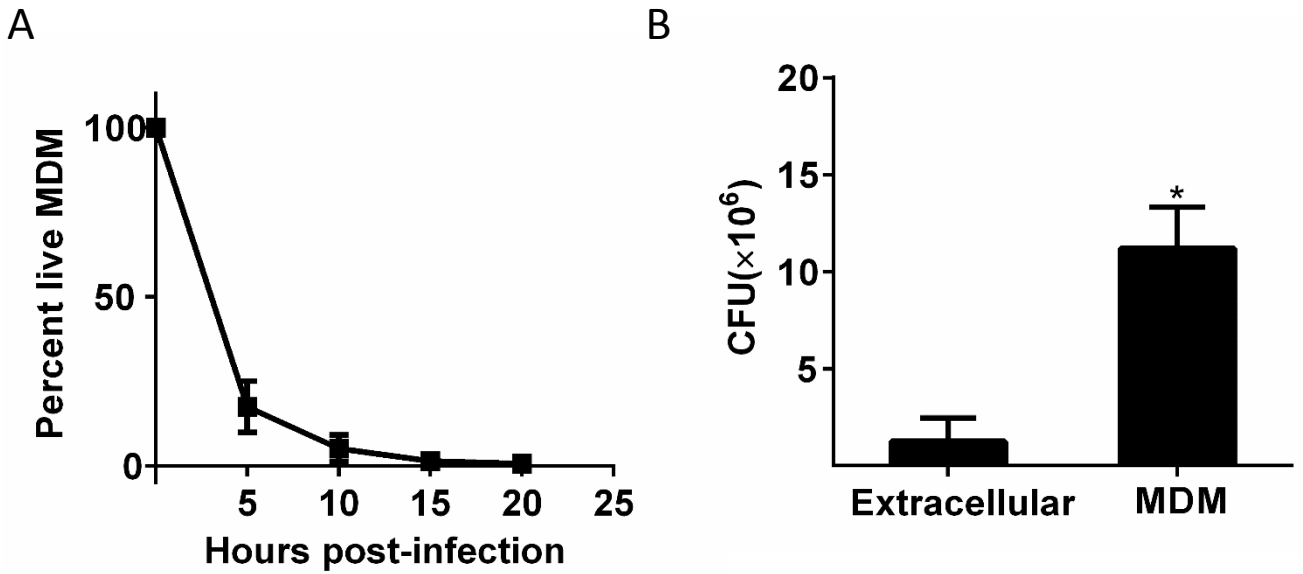

**Figure 5-Figure supplement 1.** Differences in growth measured by CFU between Mtb in dead cells and extracellular Mtb. **(A)** a homogeneous population of Mtb in dead cells was produced by infecting at a high multiplicity per cell (MOI = 30 according to CFU). **(B)** the same input dose of concentrated Mtb culture was either grown with MDM or cell-free in MDM medium for 3 days and assayed by CFU. Mean and standard deviation of two replicates. \* p=0.029 Student's t-test.
