# Supplementary material for: Intracellular growth of Mycobacterium tuberculosis after macrophage cell death leads to serial killing of host cells
Source: eLife journal article supplement (doi:10.7554/elife.22028), 2017-01-28
Supplement: supp [file elife-22028-supp-v1.zip › elife_poa_e22028_Figure_6_source_data.xlsx]

## Sheet: Sheet1
180192	363310	382011	382988	373374	411454	394935	438146	408745	426236	457305	430698	425180	388595	373938	396147	383691	400726	386556	471870	270123	379381	414872	416542	408604	418315	430971	431214	442669	433686	419735	422331	422258	429970	419416	432482	443935	441318	437845	435959	445086	443376	450124	435139	444830	441787	432976	446307	433703	527588
221320	383883	402057	396186	358578	362348	373636	364681	368389	377853	390085	386849	404971	320571	160793	179487	223916	301787	332021	348135	347740	352394	348591	348423	347366	349060	255458	296239	412507	287959	0.0001	0.0001	0.0001	0.0001	0.0001	0.0001	0.0001	0.0001	0.0001	0.0001	0.0001	0.0001	0.0001	0.0001	0.0001	0.0001	0.0001	0.0001	0.0001	0.0001
54467	67126	63644	131517	128092	163601	184220	189155	184847	204207	212180	241720	271235	210374	218428	221771	232558	245127	266831	273823	282211	283398	286895	283872	281979	289309	292780	297269	303587	307297	312066	311374	321924	322233	315670	323097	330653	333285	331733	334314	342078	346009	344187	352316	352164	350704	357640	366684	574943	371184
51036	59793	54006	57028	77649	138441	166874	186399	199549	200695	428675	455621	613957	598989	589923	562846	556576	557732	570818	598784	551071	528675	523896	510567	509363	477374	479286	459597	458995	442620	432782	430186	426046	429973	418582	423751	368741	375116	381064	375575	344289	322197	218912	235156	226423	0.0001	0.0001	0.0001	0.0001	0.0001
94117	149439	245480	399223	421977	532447	541200	546455	591925	582865	635938	645142	655392	666980	638946	625762	611086	640882	624662	619539	591114	604469	551105	481211	473285	495327	477305	415858	406232	422717	325855	230616	348581	405326	424392	431290	413585	434776	454032	453216	475810	480716	491010	494881	498746	509353	506892	526079	525791	527920
19330	40715	66001	101100	105118	136276	146548	154433	160194	173045	179985	179198	187106	198322	201600	200674	204511	206396	210544	206329	204209	83094	124365	140903	150661	159026	168145	174806	177771	184821	190544	191369	187129	189105	192686	199014	201064	200333	205001	206447	211279	212426	217682	218871	224883	227264	230611	235597	237033	243646
323825	296121	291017	296721	309584	320729	344153	334278	332151	314072	332108	342724	440338	420464	296341	269068	253124	268637	268869	284943	291125	312112	313297	341481	352389	354480	361698	356703	355795	345716	346282	344269	350110	342761	339794	343860	337448	340634	340355	336800	333864	341768	326016	301579	307211	318121	306186	304109	288398	283685
116520	142158	206684	216127	219843	245885	281939	331553	346885	378400	386199	398773	420363	439979	452831	464046	469280	471368	485142	484328	482338	491772	503585	507791	510001	519817	489824	483000	559091	512060	501292	503239	497453	488395	499261	499544	631962	621168	374510	330248	335016	369533	433383	504316	537886	555126	573829	574754	590379	590130
53666	65354	77324	79139	89084	153560	163191	182601	191857	212304	206172	209768	211626	199049	214468	208642	220992	209554	215707	217783	213715	209962	217285	208373	216349	193420	144812	210293	188598	186930	206853	216529	220495	226406	222366	225449	246751	240359	247021	250187	249896	264139	267715	272986	273696	275469	272343	266377	273524	271397
23479	29703	38229	53254	50089	62943	88397	109472	113468	112757	110446	139869	114605	123780	115720	98353	118668	106098	109285	105147	110213	96865	115063	115292	131741	132938	146053	140970	131786	129796	120636	131530	140068	116086	122480	134506	134770	138646	145218	121952	125572	129075	126542	127291	127678	129103	129756	127201	123932	112814
116520	142158	206684	216127	219843	245885	281939	331553	346885	378400	386199	398773	420363	439979	452831	464046	469280	471368	485142	484328	482338	491772	503585	507791	510001	519817	489824	483000	559091	512060	501292	503239	497453	488395	499261	499544	631962	621168	374510	330248	335016	369533	433383	504316	537886	555126	573829	574754	590379	590130
116520	142158	206684	216127	219843	245885	281939	331553	346885	378400	386199	398773	420363	439979	452831	464046	469280	471368	485142	484328	482338	491772	503585	507791	510001	519817	494026	483000	559091	512060	501292	503239	497453	488395	499261	499544	631962	621168	374510	330248	335016	369533	433383	504316	537886	555126	573829	574754	590379	590130
70557	79537	108845	122857	107380	113319	116804	134383	127836	135197	133522	145340	163764	194511	193434	207498	217779	220670	211133	218635	231675	219772	214587	202329	237655	231155	260384	267277	267704	272014	183748	181802	178511	209889	228071	247465	255597	265561	271702	275913	276095	0.0001	0.0001	0.0001	0.0001	0.0001	0.0001	0.0001	0.0001	0.0001
195658	267866	340859	340063	376091	424948	441928	494522	544370	595339	676233	814573	803094	677537	678472	698934	705593	726306	718379	721077	793074	812339	769893	732165	652281	390373	383282	338269	334648	289295	288416	299039	285204	262130	167830	155873	121144	111307	0.0001	0.0001	0.0001	0.0001	0.0001	0.0001	0.0001	0.0001	0.0001	0.0001	0.0001	0.0001
115881	125665	121215	127507	171738	167684	191756	193360	192613	197802	191294	194263	204317	224057	231785	237292	240765	257124	287468	302174	293044	296546	292502	308172	303394	294412	300284	326581	328758	333966	339171	350866	344154	297111	291016	297304	305456	313081	319224	324340	327257	331325	338769	339756	352410	354815	363533	356653	357304	364834
8054	7866	7657	19125	28731	48079	37539	35614	37905	36823	146612	133132	139835	150101	149898	174477	189560	195116	189491	196515	199879	195393	209185	214965	213924	216724	204494	211978	200433	186314	220403	216971	200210	218742	112186	116602	124372	137814	132204	136387	138919	139637	138936	143138	142513	146187	148670	148398	152289	252682
102084	189926	185335	204772	183645	292899	299506	327538	324246	345850	333596	334387	365106	357485	389841	423550	432427	466367	409424	419923	409763	417407	429867	423391	427773	423353	438779	478430	413445	398436	397710	414592	411632	421069	394601	387189	383112	380009	403739	402920	420037	431961	422155	433612	427402	407047	377122	369613	411505	402069
13986	57412	87728	95902	90810	120227	126094	133059	125372	124196	121922	123424	141606	151706	149540	153241	137169	172902	173805	150495	152648	154504	155249	142901	163655	160408	155506	162431	157441	103729	104568	106796	110516	114245	135298	126550	124293	124156	124673	123476	123553	121000	122235	124182	123276	122958	123038	126047	125438	128182
94725	123959	135406	151694	155331	164330	178018	180093	178183	189316	182448	179993	180115	166091	172620	232501	239655	231028	230363	234583	238460	241625	236683	240712	233013	230824	237157	246123	258692	269016	262317	271737	276038	277252	273063	264469	239744	222035	196499	226374	219541	204431	201189	206398	219618	220954	217015	163858	175584	173658
159909	179318	206183	225793	229629	246870	244585	256090	264076	269366	262874	260572	246431	250322	243449	266573	260058	240285	240173	259537	289656	303557	342068	357724	342420	330739	308184	276429	269613	275103	276809	285785	303213	306750	311425	313996	315345	318908	321534	328929	333894	336572	338089	353180	335834	326811	323120	320306	325193	322194
0	43014	118864	182626	251791	289943	436876	543275	528109	571289	657019	678267	679153	762225	816568	864757	948290	982343	1016462	1077998	1056913	1112965	1079359	1238917	1261045	942331	645843	583022	589145	845078	944742	965502	981816	1038370	1067627	1049388	770769	0.0001	0.0001	0.0001	0.0001	0.0001	0.0001	0.0001	0.0001	0.0001	0.0001	0.0001	0.0001	0.0001
16271	6245	18595	37244	106522	90127	126603	124075	144575	140791	151533	297258	333186	301124	175610	129344	112943	128893	139440	156685	141428	148684	150646	161714	181266	171469	190537	203446	221604	234838	259211	229397	228673	225250	224678	227607	244039	248231	256955	260591	0.0001	0.0001	0.0001	0.0001	0.0001	0.0001	0.0001	0.0001	0.0001	0.0001
37739	91271	172522	194208	267351	309663	298852	339625	429255	439928	520638	567671	599978	620359	664889	687276	681956	677372	696190	738340	768341	786982	792914	782084	796373	809775	791726	762616	770287	673921	591766	604479	632774	627223	620326	621761	626698	633093	624341	628403	638471	639687	639961	638789	655194	658462	658821	660289	667684	658787
36695	49275	113135	251796	369260	426060	488266	506041	598569	643806	635567	633781	540992	565123	495687	551078	530111	497282	518718	500289	533973	622220	507445	488540	486221	566311	612586	596855	584826	636733	676508	798091	925692	950945	871258	955622	899629	928478	1059149	927423	1039979	910598	936841	976945	975407	892197	785433	667186	592290	613563
183223	274990	503346	571990	782970	797689	877056	870751	968298	1107126	1136739	1151787	1260420	1277677	1269339	1274826	1116079	1043741	1042031	1069000	1068521	1066337	1095149	1141421	1154253	1152456	1186754	1171282	0.0001	0.0001	0.0001	0.0001	0.0001	0.0001	0.0001	0.0001	0.0001	0.0001	0.0001	0.0001	0.0001	0.0001	0.0001	0.0001	0.0001	0.0001	0.0001	0.0001	0.0001	0.0001
43408	62356	186444	289427	375752	487120	524377	575664	792330	868629	909682	901499	927085	918388	966430	988790	1061341	1147036	1106714	1109694	1144312	1148717	1173238	1138024	1199372	1266910	1241850	1195289	1212620	1216206	1216190	1289644	1369168	1354769	1429583	1224989	620344	0.0001	0.0001	0.0001	0.0001	0.0001	0.0001	0.0001	0.0001	0.0001	0.0001	0.0001	0.0001	0.0001
23511	196297	354146	341470	333076	364175	373757	420691	430362	415480	334079	291758	303386	284085	163499	105692	111918	134746	125765	148773	143441	155960	109250	139468	56475	79912	124708	192601	160604	222397	218531	263151	244458	261621	259898	270201	301252	318872	350217	378741	374281	196380	221959	87384	0.0001	0.0001	0.0001	0.0001	0.0001	0.0001
20746	64952	88358	134892	180788	240584	288319	336154	348569	381402	454398	465419	471433	489133	502434	487015	523449	577318	615218	604349	581162	575091	582335	593429	597502	603745	614198	622800	630437	640675	637270	634806	644057	651709	660178	0.0001	0.0001	0.0001	0.0001	0.0001	0.0001	0.0001	0.0001	0.0001	0.0001	0.0001	0.0001	0.0001	0.0001	0.0001
18441	362565	294474	539252	611959	609713	594964	569549	596992	620256	644985	718188	762987	772750	747676	797722	788477	822035	835219	822982	827371	843865	815305	833356	829739	812837	822510	1002635	1229956	1291944	1312352	828404	900290	871514	932561	988680	1038691	1161790	1108745	1081835	1028317	587747	0.0001	0.0001	0.0001	0.0001	0.0001	0.0001	0.0001	0.0001
95690	100154	81600	116567	127943	171344	146121	190970	209156	177035	187240	219446	254751	262151	342580	306703	296569	352828	345384	367455	352142	383848	362446	376775	388306	379157	376664	434423	380838	377083	384427	361672	370501	625504	656278	736426	721710	744561	747909	739974	754493	732622	761145	700500	732420	0.0001	0.0001	0.0001	0.0001	0.0001
30815	47503	96106	148370	233062	538070	681933	655944	553434	784211	830799	862669	924708	928445	947331	1030151	1069637	995779	1075733	1089871	1145146	1100240	1155751	1261197	1269459	1291389	1407472	1465083	1494793	1437218	1486034	1472948	1494217	1510046	1471400	1479065	1499141	1533087	1529753	1523498	1519741	1543244	1569958	1568748	1594338	0.0001	0.0001	0.0001	0.0001	0.0001
40777	31018	55245	60471	71684	118103	75841	91840	99396	103090	98447	115271	160958	146081	215413	224535	248612	293683	279255	265957	292340	352027	488303	506429	660760	682017	733670	743352	745617	768567	738595	731520	726826	698117	878941	867557	934025	977575	900225	808874	665325	737624	792147	838866	858962	884590	921439	911361	938629	986281
15741	37447	34532	66193	448539	242075	110171	144570	72937	277548	246458	132074	140756	158035	274477	369169	381843	329396	502092	569580	613056	612880	635369	619587	455758	347584	327799	392715	393594	378036	519903	409568	391579	395609	418074	416589	453225	457055	479821	485937	482884	508052	505252	475878	495950	0.0001	0.0001	0.0001	0.0001	0.0001
42350	34757	34459	60157	104513	100331	123104	93761	120866	126553	130998	144549	292643	249974	163992	153690	160759	153875	164203	195788	220096	222464	235217	242180	186479	0.0001	0.0001	0.0001	0.0001	0.0001	0.0001	0.0001	0.0001	0.0001	0.0001	0.0001	0.0001	0.0001	0.0001	0.0001	0.0001	0.0001	0.0001	0.0001	0.0001	0.0001	0.0001	0.0001	0.0001	0.0001
51713	72444	84420	135859	223377	452479	778207	889265	1084334	916312	825771	741636	669189	722450	696426	870853	966661	992126	1040502	1110125	1111260	1154670	1153465	1346212	1275292	1664516	1613466	1481779	1507011	1378348	1551758	0.0001	0.0001	0.0001	0.0001	0.0001	0.0001	0.0001	0.0001	0.0001	0.0001	0.0001	0.0001	0.0001	0.0001	0.0001	0.0001	0.0001	0.0001	0.0001
14229	116457	137129	173240	227249	237317	352490	357616	406533	492607	746056	930518	1078391	1129881	1319076	1368686	1553584	1469179	1416565	1393357	1376795	1408819	1432636	1411030	0.0001	0.0001	0.0001	0.0001	0.0001	0.0001	0.0001	0.0001	0.0001	0.0001	0.0001	0.0001	0.0001	0.0001	0.0001	0.0001	0.0001	0.0001	0.0001	0.0001	0.0001	0.0001	0.0001	0.0001	0.0001	0.0001
77466	104279	140333	177820	204430	363394	371848	318179	337140	418811	500556	594288	687468	715072	750721	762378	862005	945841	1013064	1072977	1147552	1298495	1412116	1122155	1129127	1138636	1150078	1236089	1182438	1233526	1262748	1196673	1294686	0.0001	0.0001	0.0001	0.0001	0.0001	0.0001	0.0001	0.0001	0.0001	0.0001	0.0001	0.0001	0.0001	0.0001	0.0001	0.0001	0.0001
236400	208987	330313	472735	621121	850992	945519	1039744	1210759	1372729	1486597	1527483	1603103	1731203	1662342	1883772	1762191	1751807	1792599	1826676	1852925	1951351	1937242	1924799	1971654	1977279	2006306	2059019	1965215	1981081	1956440	1919062	1909688	1904043	2603971	2158958	2052850	1332877	1310392	1343268	1171520	1208813	1139532	962972	1329486	1030255	0.0001	0.0001	0.0001	0.0001
103581	109872	115255	140547	168496	178721	236602	292018	352520	403386	577417	565254	572985	765682	754621	791662	775952	720816	716219	738627	805122	876124	846266	879619	875828	890016	879616	889153	891198	893625	0.0001	0.0001	0.0001	0.0001	0.0001	0.0001	0.0001	0.0001	0.0001	0.0001	0.0001	0.0001	0.0001	0.0001	0.0001	0.0001	0.0001	0.0001	0.0001	0.0001
20315	95449	310470	326791	508791	510011	500725	448765	447004	452775	448276	391961	353385	405226	430700	230410	577936	549858	491221	493501	281310	479394	619634	576622	645198	446865	781476	804057	603735	557739	799797	835602	772783	580706	552080	517923	494557	498222	486258	478089	492851	495666	483613	485696	481586	0.0001	0.0001	0.0001	0.0001	0.0001
47807	51687	63104	103544	206493	314288	375552	457397	498235	506306	529680	587797	730549	744853	767578	829940	835614	1042553	1413085	1287850	1260674	1374019	1404796	1364476	1466842	1400387	1417004	1433370	1495237	1488499	1500758	1498696	1514991	1447128	1465495	1518611	1501867	1493867	1520048	1525365	0.0001	0.0001	0.0001	0.0001	0.0001	0.0001	0.0001	0.0001	0.0001	0.0001
166185	101817	1445116	1419443	1509521	1534855	1634240	1683064	1869174	1807338	1790595	1790583	1582045	1058625	711154	970668	1304632	1430353	1482771	1509921	1547335	1516504	1610482	1693528	1619436	0.0001	0.0001	0.0001	0.0001	0.0001	0.0001	0.0001	0.0001	0.0001	0.0001	0.0001	0.0001	0.0001	0.0001	0.0001	0.0001	0.0001	0.0001	0.0001	0.0001	0.0001	0.0001	0.0001	0.0001	0.0001
63014	74672	150169	259242	292363	291292	344607	435814	414465	426630	423132	446549	558074	549968	649022	649983	3346	734259	474909	478872	499890	550256	561977	597219	592429	599119	606997	614505	436629	0.0001	0.0001	0.0001	0.0001	0.0001	0.0001	0.0001	0.0001	0.0001	0.0001	0.0001	0.0001	0.0001	0.0001	0.0001	0.0001	0.0001	0.0001	0.0001	0.0001	0.0001
75572	86975	199972	280108	643571	728916	761351	1081873	1179769	1264567	1215032	1276542	1131848	1114709	1135377	1154026	1201733	1269441	1439353	1367393	1324588	1337877	1326138	1337160	0.0001	0.0001	0.0001	0.0001	0.0001	0.0001	0.0001	0.0001	0.0001	0.0001	0.0001	0.0001	0.0001	0.0001	0.0001	0.0001	0.0001	0.0001	0.0001	0.0001	0.0001	0.0001	0.0001	0.0001	0.0001	0.0001
5454	162858	205526	332145	439804	576988	722873	771110	790178	919920	954780	1070977	1011991	1093860	1237012	1178504	1334343	1431418	1593511	1471494	1311032	1543484	1554014	1491518	1289190	812493	746406	670959	466514	518692	476845	416546	443888	411978	393791	560052	611710	601215	566008	587512	0.0001	0.0001	0.0001	0.0001	0.0001	0.0001	0.0001	0.0001	0.0001	0.0001
48296	352038	347021	311190	420526	442781	431419	504703	611938	545907	589581	603650	590870	607952	580953	637875	715211	648324	583243	538164	509125	554009	578377	647821	742491	718211	670113	737574	754518	758583	746943	795768	905075	810487	754199	569669	627771	736317	568222	499486	444463	443918	447500	458131	488426	493386	498763	509611	511624	529533
47849	67184	83590	116319	107931	144517	193903	228237	259470	500814	498271	461858	486252	505389	514339	496486	599272	645531	545241	593859	602975	573340	660425	776591	478334	542557	586787	570641	584554	566414	571334	566825	562946	543734	557464	0.0001	0.0001	0.0001	0.0001	0.0001	0.0001	0.0001	0.0001	0.0001	0.0001	0.0001	0.0001	0.0001	0.0001	0.0001
636541	523801	781120	952376	981948	986996	1089890	1107202	1148899	1089594	1179888	1293267	1214538	999740	943263	1049985	1058032	1093659	1084028	1059243	1065331	50072	0.0001	0.0001	0.0001	0.0001	0.0001	0.0001	0.0001	0.0001	0.0001	0.0001	0.0001	0.0001	0.0001	0.0001	0.0001	0.0001	0.0001	0.0001	0.0001	0.0001	0.0001	0.0001	0.0001	0.0001	0.0001	0.0001	0.0001	0.0001
59373	143788	146894	170266	175686	169055	183183	193098	196398	222608	227774	207051	215203	240422	238397	249892	249234	234853	196799	230311	279015	293424	224736	226038	170782	239680	223398	209019	146240	150914	153651	161374	178997	163780	0.0001	0.0001	0.0001	0.0001	0.0001	0.0001	0.0001	0.0001	0.0001	0.0001	0.0001	0.0001	0.0001	0.0001	0.0001	0.0001
59029	82330	93897	130171	163654	255959	273678	320624	339914	419728	499338	530113	453278	455873	513082	492228	582390	566049	586137	561285	644544	604877	589013	582957	588058	605003	605527	617464	630335	601022	620976	616133	592699	624841	589371	506377	496480	477288	0.0001	0.0001	0.0001	0.0001	0.0001	0.0001	0.0001	0.0001	0.0001	0.0001	0.0001	0.0001
100161	113098	148159	216895	274213	302656	323744	320616	354417	351378	362864	409265	444086	483727	502929	533102	449042	717259	731902	839573	1158750	1193333	1382243	1012139	1095154	1106564	1169238	1147198	1160055	1047247	1042605	1055789	1096089	1108162	1117867	1137238	1155358	1156466	1194997	1180660	0.0001	0.0001	0.0001	0.0001	0.0001	0.0001	0.0001	0.0001	0.0001	0.0001
89052	126855	267828	446429	446654	476251	482307	473256	513415	550211	557944	616105	582984	626326	663169	685649	681188	690429	660322	643973	646135	683805	669893	665540	606816	632879	541150	518349	582884	465541	390573	380418	433586	487519	521651	544702	551100	547866	594594	570117	561318	559778	563366	559063	566480	0.0001	0.0001	0.0001	0.0001	0.0001
208945	257063	444318	528010	554073	583603	594564	611598	669208	693004	697524	730949	894443	894531	1027548	1130652	1133974	1117509	1164424	1189844	1188219	1364594	1364988	642081	320999	299232	309822	356917	383944	413763	370106	461568	402016	530501	0.0001	0.0001	0.0001	0.0001	0.0001	0.0001	0.0001	0.0001	0.0001	0.0001	0.0001	0.0001	0.0001	0.0001	0.0001	0.0001
285613	383604	479868	486017	490591	561261	568493	608357	662150	686394	721976	761114	618490	508707	390343	444910	466765	503611	503738	528311	520935	619959	667664	652127	618252	600086	641379	629526	610597	623132	0.0001	0.0001	0.0001	0.0001	0.0001	0.0001	0.0001	0.0001	0.0001	0.0001	0.0001	0.0001	0.0001	0.0001	0.0001	0.0001	0.0001	0.0001	0.0001	0.0001
169256	228234	312982	487111	559057	652314	648695	681788	769058	894868	925108	937303	893713	1014988	578575	461651	622145	789275	852174	870119	864042	862947	852880	891093	842989	799632	0.0001	0.0001	0.0001	0.0001	0.0001	0.0001	0.0001	0.0001	0.0001	0.0001	0.0001	0.0001	0.0001	0.0001	0.0001	0.0001	0.0001	0.0001	0.0001	0.0001	0.0001	0.0001	0.0001	0.0001
183320	228466	297530	418596	558277	633354	697713	761844	766567	913026	947698	996976	1042471	1056839	1046424	1082384	820923	705443	607638	500810	594102	574124	614695	594826	765635	842117	756718	1227040	1046938	902313	959449	960620	921453	968885	934512	941252	969442	988503	0.0001	0.0001	0.0001	0.0001	0.0001	0.0001	0.0001	0.0001	0.0001	0.0001	0.0001	0.0001
196448	264354	447717	441323	564455	615080	653045	709335	752841	774214	862940	884329	956987	1018419	586488	779609	903026	933659	1072473	886594	891883	890694	848052	853663	831897	0.0001	0.0001	0.0001	0.0001	0.0001	0.0001	0.0001	0.0001	0.0001	0.0001	0.0001	0.0001	0.0001	0.0001	0.0001	0.0001	0.0001	0.0001	0.0001	0.0001	0.0001	0.0001	0.0001	0.0001	0.0001
328037	636504	682854	756731	808480	926633	990798	1021402	1167079	1342393	1413328	1548049	1573458	1237978	1391775	1527281	1595559	1495270	1513185	1515121	1507892	1513275	1533021	1532757	1550423	1543835	1570300	1541792	1560399	1576070	1556374	1569576	1556012	1557005	1576401	1588005	1598770	1602338	1593113	1614831	0.0001	0.0001	0.0001	0.0001	0.0001	0.0001	0.0001	0.0001	0.0001	0.0001
542642	585581	556857	639663	638115	523403	478017	536803	691822	700546	758547	733232	686009	696415	681455	768588	895016	868341	872782	869748	929443	931411	981275	911823	880504	987507	944546	967997	929712	884808	903751	1026987	971627	679635	502819	490488	513535	548070	616763	627501	595502	595431	644746	700532	692908	627117	0.0001	0.0001	0.0001	0.0001
44	5388	45721	46639	44248	35204	48945	156911	145499	165662	164529	154365	150385	209441	223714	218382	220248	195904	119942	68574	66714	96500	88792	121805	119951	132044	164399	161364	173444	165774	178349	157825	171097	0.0001	0.0001	0.0001	0.0001	0.0001	0.0001	0.0001	0.0001	0.0001	0.0001	0.0001	0.0001	0.0001	0.0001	0.0001	0.0001	0.0001
327462	420094	422600	447861	2248	21115	766483	877184	986400	1051074	1174318	1288753	1159083	977467	901422	964427	1075024	1116287	1161971	1074563	1156967	1124219	1139621	963293	0.0001	0.0001	0.0001	0.0001	0.0001	0.0001	0.0001	0.0001	0.0001	0.0001	0.0001	0.0001	0.0001	0.0001	0.0001	0.0001	0.0001	0.0001	0.0001	0.0001	0.0001	0.0001	0.0001	0.0001	0.0001	0.0001
55134	81708	155452	232463	384088	438738	467146	838881	836564	904937	962130	1106520	1284407	1188684	1431188	1410068	1395485	1461215	1189444	1036117	698510	646691	783199	824924	889585	918916	897733	911300	955502	948415	995160	1003825	979128	1073549	1076391	1042967	1051490	1063056	1079190	1076009	0.0001	0.0001	0.0001	0.0001	0.0001	0.0001	0.0001	0.0001	0.0001	0.0001
522769	489579	541713	469918	446879	451830	523636	565426	651017	683956	780385	821667	823144	905171	925708	906278	963819	970386	988592	824923	552192	588221	672581	705670	725674	744143	729955	711791	705493	678329	0.0001	0.0001	0.0001	0.0001	0.0001	0.0001	0.0001	0.0001	0.0001	0.0001	0.0001	0.0001	0.0001	0.0001	0.0001	0.0001	0.0001	0.0001	0.0001	0.0001
65742	100444	121565	122927	240979	278929	286305	333519	383310	376307	380762	346432	275645	283636	369744	393664	403722	367963	287461	311608	314775	326594	317138	325679	383751	332455	335300	357196	355761	378156	387789	0.0001	0.0001	0.0001	0.0001	0.0001	0.0001	0.0001	0.0001	0.0001	0.0001	0.0001	0.0001	0.0001	0.0001	0.0001	0.0001	0.0001	0.0001	0.0001
235739	269965	375854	419901	441242	501153	530174	581793	632967	634846	636527	640716	631759	704477	691045	768558	762963	794384	829700	820706	932780	886277	967637	976202	974134	992468	1053560	1017513	994564	937583	939709	936950	931217	963336	912923	910785	928655	1013931	963034	1025272	1038312	1066399	1036570	1054114	1085162	1115406	1132167	1109236	1117932	1076667
89891	369806	251452	191806	530122	592904	568777	617057	503402	775228	775489	887907	824096	715186	739659	1254027	881627	714274	629420	1114498	963444	1024128	912534	1036459	814707	376142	462590	337768	354623	354136	356630	426136	428734	473928	435410	475256	670649	654369	740559	1097929	985761	1046858	836456	803775	834506	845788	881820	873729	957452	1017544
113895	276924	284489	363186	577176	713640	657708	715182	935513	752987	761559	808475	840205	824069	844590	880989	874393	831971	850997	820822	876843	840455	314921	307999	286098	292593	355757	353278	360599	412187	353186	444586	450454	710245	776659	490401	420749	0.0001	0.0001	0.0001	0.0001	0.0001	0.0001	0.0001	0.0001	0.0001	0.0001	0.0001	0.0001	0.0001
41489	89186	146515	492848	485151	627161	766227	802727	993495	1224915	1259934	1324997	1526825	1613951	1682099	1702643	1782276	1701960	1797334	2009466	1922838	1949876	1803792	1394183	1449130	1416204	1427882	1495770	1578106	1553157	1613233	1655608	1693666	1646296	1691391	1708175	1773262	1816511	0.0001	0.0001	0.0001	0.0001	0.0001	0.0001	0.0001	0.0001	0.0001	0.0001	0.0001	0.0001
864257	774898	608529	1421703	1593351	1227591	1037722	1059470	1181257	1139925	1253967	1220040	1186262	1225912	1289313	1394315	1489920	1484791	1449894	1416921	1796508	1742523	1560660	1536257	1412185	1658109	1769151	1649516	1619413	1447943	1214058	1045634	1548844	894117	1008368	1225967	1620391	1648193	1705841	1693372	1674424	1640638	1674537	1771080	1713708	1811596	1780145	0.0001	0.0001	0.0001
170349	181507	205100	262475	259583	521199	458112	546009	365643	440518	444496	492902	600476	551570	580442	593795	582442	682988	806101	759709	731910	718418	586383	711336	701247	574257	534430	491451	487213	440222	357784	382217	419658	425996	461006	464002	498662	490933	512303	570524	547893	554398	589401	581899	0.0001	0.0001	0.0001	0.0001	0.0001	0.0001
17364	32622	155418	202175	261524	298944	455231	516442	553016	577658	638479	632747	645168	665351	647328	695566	693227	678643	680770	722002	678859	749296	734447	670488	681800	681175	690031	675336	627843	674028	579227	635205	574210	559235	359839	433925	322674	407730	474345	477033	478504	497687	503856	506175	506871	515769	527013	541651	534840	543453
94902	102695	106772	182626	227745	303179	302409	370225	486222	535151	508424	549349	585735	526240	525353	571338	554218	606881	591603	676822	669635	706444	601222	591543	657164	661938	712156	744040	768924	748155	826175	798567	1024913	956644	1097117	1085166	876180	678713	675645	501698	501817	541894	560993	571513	570317	561848	586140	603833	596767	648170
99693	21053	188696	365959	368325	527138	573549	655867	735834	895991	1038516	1074537	1185913	1129238	1284651	1029855	1252779	1233145	998005	1094586	1195101	1001722	1117968	1224982	1380914	1622157	1463112	1808695	1995124	1917219	1627289	1694014	1882278	2018260	1416375	1208364	1891884	1416434	554696	553853	604011	654216	926389	973628	996381	973192	958489	1060820	1065118	1053463
29805	95163	139977	149578	245862	335158	386943	408169	509345	509206	563768	653179	701800	756127	813651	844102	924454	869743	926304	941165	852878	952738	1029217	1084756	1119027	1143745	1096477	994421	1101362	986937	1105585	940281	939664	997848	1008604	927502	688275	717764	706298	730227	673440	792380	545824	623577	626389	670574	668253	686725	681700	743859
17653	31929	50026	89420	122643	166862	246831	430139	408499	472231	612126	632552	616877	610880	516650	676061	751812	752406	1063631	1064648	1010961	805950	579960	676528	694742	693264	711652	672957	662109	657479	665762	649531	645752	594463	527845	0.0001	0.0001	0.0001	0.0001	0.0001	0.0001	0.0001	0.0001	0.0001	0.0001	0.0001	0.0001	0.0001	0.0001	0.0001
1176	58019	131082	157811	235336	269283	329384	323496	340555	367919	420050	422591	405775	514462	493424	486487	523994	622522	594840	600749	626268	637876	670831	683226	677819	650472	638666	661624	678355	628013	597699	593366	654842	719664	683356	644171	545095	535971	373971	370286	494271	575097	593224	610816	647605	618095	607799	613218	641660	605377
[truncated: 950 more columns]
