# Supplementary material for: Intracellular growth of Mycobacterium tuberculosis after macrophage cell death leads to serial killing of host cells
Source: eLife journal article supplement (doi:10.7554/elife.22028), 2017-01-28
Supplement: supp [file elife-22028-supp-v1.zip › elife_poa_e22028_Figure_7_source_data_1.xlsx]

## Sheet: Sheet1
1877	2273	3325	3634	5219	4995	6603	6325	6658	8409	8172	9048	9818	11308	11305	9400	8166	8033	9638	10465	10839	11525	11030	10294	8663	8589	12519	11395	10717	12417	11971	11900	12332	11670	9740	10044	10569	12120	12472	3069	734	11738	11526	13182	12956	12335	6364	12393	11212	12276
1666	1944	1512	2025	2138	2642	2453	2634	2610	2610	2733	2810	2761	2848	2700	1801	2088	2153	2341	2045	2489	2699	2135	2146	1681	1554	1598	1701	1666	1934	1509	1903	1234	1083	942	927	974	1068	1207	217	154	1751	1400	2318	1653	391	190	2704	2298	2377
3010	2702	2449	2629	3071	2977	3473	3376	3914	3899	3861	3989	4051	4039	3375	2985	3200	2438	2014	2375	3703	2916	3903	3160	3948	4025	4046	4314	4244	4202	4134	4370	4300	4226	4118	4286	4191	4721	4436	3902	4110	4058	2728	4643	4739	4429	4127	3476	3912	4472
837	794	949	1034	2518	1756	1256	827	699	640	786	839	635	652	752	969	1844	1178	1931	1447	1805	1355	1853	1053	1175	1222	1494	1784	1750	2033	1337	1858	1758	1949	2492	2465	3184	3854	2590	3403	2928	3053	2142	1441	1138	1116	1101	1388	1543	1734
731	113	96	87	112	65	53	49	51	57	50	159	2053	4824	4815	5216	5928	5023	4156	2711	4499	4285	2977	3481	4021	4408	7258	9675	11173	708	793	5103	2332	4559	6244	6971	7117	6939	4839	5341	3434	6202	7705	9918	8227	8838	8104	9141	7799	15869
4650	1865	4949	5940	5525	5610	5661	5266	6020	6210	5394	5308	4386	4425	5349	5479	4930	5364	4418	4231	5150	5102	4749	4717	4280	3998	3493	3069	3680	2993	2899	4362	3888	3813	4278	4468	4649	4758	4694	4271	3132	3803	5059	6892	7767	6228	5446	5179	5648	6646
3005	1508	4104	3564	1152	213	703	1635	2351	2558	2425	2357	2495	2916	3176	4007	4009	4184	4275	3440	876	140	188	165	3755	5878	5496	4498	5868	4063	5101	5569	4627	4579	6782	5862	5658	6305	6813	3135	1429	4265	3104	4146	2146	2571	2228	3771	2676	3320
22663	23946	17536	16244	13091	12474	19599	11142	16490	20141	15995	16832	23504	17837	21949	19368	21330	20237	19358	22926	21636	19117	18593	16245	21261	19830	21572	19540	19121	21546	20597	21379	19563	15853	14838	14520	14823	13355	16371	9961	12232	16475	18499	19945	15253	15146	3730	12579	12541	17463
3512	3469	5315	6629	9099	9270	8098	8167	7675	7182	6655	5709	4752	6377	9984	13007	10657	13285	12892	5859	12579	14235	12788	11512	12270	10283	11182	12427	15020	13390	13481	14837	15237	17007	14160	14649	13555	13872	14515	16207	12018	15457	11833	16370	16835	14999	12331	17001	15725	16902
3806	3456	3254	3383	4245	3959	4264	3631	5132	4946	3731	4607	4888	4853	3959	3564	3199	3528	4367	4638	3914	5007	4951	4885	4796	4540	3128	4322	5151	5482	6123	6108	6242	5563	6110	4200	3328	2412	2408	1926	1933	2484	2255	2752	1922	2372	148	2001	2057	2080
3186	3842	3048	2191	615	889	730	735	1410	1098	1164	1865	2014	2329	2489	2391	1933	2244	1712	1607	1540	1562	1409	2546	2196	2571	2151	3112	3613	3439	3247	3524	3451	3457	2780	2115	2349	2151	2605	2563	2664	2487	2826	2805	3017	2754	3111	3176	2163	3019
284	246	242	230	297	214	299	201	213	233	165	219	210	262	208	281	229	183	190	205	177	334	645	735	732	523	901	963	764	915	822	1200	166	106	56	75	81	58	61	55	52	1722	1443	2380	461	1421	249	2565	2390	2484
1545	1410	1571	1130	1159	621	1452	1445	883	824	898	716	743	761	740	1603	1258	1153	1184	1092	632	984	759	1039	1166	954	704	701	1056	1038	1149	970	1115	1197	1244	903	921	1072	1327	1138	1254	909	905	1067	1561	1078	1109	1057	1158	1162
4628	3226	4596	5024	4131	5097	4642	3759	3780	4025	4086	4631	4403	4160	3274	3447	2670	2941	3188	3011	3018	4237	4859	3966	4452	4772	5012	5232	5159	4487	3379	4623	3757	4019	3107	2953	2992	3097	2956	2428	2597	2983	4024	3877	3626	4120	3041	3707	4161	3844
4967	4239	4849	4785	4406	4524	3752	3940	3437	3693	3845	4701	4823	5034	4796	3907	3709	2540	1839	1269	1240	1232	1257	1305	1289	1182	1115	1143	1139	1142	1598	1263	1323	1628	1814	1275	1608	1698	1595	101	110	1651	2026	2434	1456	1381	138	1565	1714	1482
2645	2348	2022	3709	5578	8085	7678	7912	6233	7015	7114	6207	8984	8019	9069	8071	7326	5345	3265	1328	2666	4246	5198	7485	9326	8082	8151	8416	8610	8649	8546	8827	9179	9903	8483	9496	8319	9355	9090	94	245	7962	7184	7543	9138	10047	8556	7204	6658	8152
13178	14532	15870	15573	16010	9635	7942	3114	4094	3056	5464	8267	11588	7414	8367	16518	16249	15634	17082	17497	13624	12949	11350	15374	14574	16648	17357	18935	18687	18263	17231	16720	13736	13006	8709	10418	11187	11685	11024	822	228	7534	8060	9607	8189	11791	264	15558	12552	14565
1244	4077	3219	3579	2485	2338	2711	3329	4486	4276	4866	4721	3762	3455	3179	3979	4201	3060	2670	2088	1436	1695	1885	2900	2206	2273	2857	3720	3165	1808	1750	2344	2269	1611	2128	2063	2259	2791	2647	2281	2890	3289	3363	2916	2019	1610	1388	2525	2325	2586
12022	14905	17888	11562	23742	26468	26675	36427	38657	33455	32679	25810	26084	21573	21915	20131	27185	29039	24518	25126	20408	20078	16627	9245	9881	7235	9507	14660	17409	20675	18802	13793	15625	17111	10542	8657	9249	10181	7835	87	84	8114	8239	3988	94	73	85	11459	11240	10625
12180	8626	8892	9084	13832	14590	15475	16027	15517	16449	18867	18238	18214	17283	18236	17839	15922	13208	15565	18179	12910	11499	12658	13655	14719	14542	17949	18352	17683	16803	15979	16949	14294	15967	16225	16507	17441	18327	19222	16974	19396	17297	17939	19699	19246	18989	17964	17992	18291	18008
3423	5311	4889	5252	6448	5933	5544	5565	4922	5868	5364	5655	5529	5903	5953	5632	5084	5971	6072	5448	4826	5819	6917	5950	5645	6353	5219	5410	5112	6409	7127	5759	5203	4427	3747	4461	6390	6586	6435	6342	5730	5833	2125	3830	3370	5742	5312	6060	5499	7033
6260	5781	5814	5591	5702	5754	5908	5244	5379	5592	5253	5475	4675	4887	5074	5451	5466	4768	5011	5286	4978	5398	5029	5285	5126	5594	5897	5809	5518	5122	5497	4056	5250	5053	5565	5412	4801	4894	4482	5397	91	5771	73	6003	6325	6609	3836	6543	154	5891
6999	6016	11157	8953	7262	7977	10836	10567	10899	10052	10172	10668	10538	10383	9118	9110	8805	8802	9616	9188	10916	8999	7726	7327	7695	8529	10405	10437	10213	9655	9092	9189	8695	8897	8079	8503	9001	8181	7925	7966	6826	9024	50	9868	9154	9515	1541	9913	9797	9837
97	177	814	732	559	165	466	504	489	484	477	446	447	477	441	447	506	409	523	571	563	504	541	487	467	496	481	509	531	493	487	568	557	531	506	548	707	677	627	545	497	546	536	587	407	315	25	535	542	575
461	1658	1599	1530	1617	1377	1200	1452	1449	1841	1278	1513	1571	1785	1530	1710	1716	1607	1773	1696	1608	1483	1245	1575	2751	1758	2347	2546	2207	2202	1584	1167	2143	901	2376	2286	1427	1314	1513	1276	1148	1209	1286	1408	1306	1210	1291	1374	1398	1476
2224	2272	1947	2260	1910	1596	1392	1807	1822	1841	1708	2605	1704	2007	1691	1705	2097	2626	1879	2340	2030	1618	1529	1725	1622	1559	1856	2455	2059	1891	1915	1689	1652	2036	1918	2186	1843	1886	2149	2045	2057	2466	1706	1942	1771	2005	1802	1603	1150	1793
25095	26827	24595	25606	30970	33632	33086	34422	33281	33375	35545	35946	31476	34511	30744	25718	24752	22847	25177	28198	28946	38273	36242	32683	28626	28706	32053	30100	32657	35746	37161	33508	37528	31158	41344	39606	37868	37694	36987	39015	40604	41904	33602	32443	34761	32962	35002	35059	30264	27414
2908	2891	2874	2757	2779	3003	2717	2735	3072	3226	2868	3126	3057	3124	3181	3291	3043	3270	3359	3222	3467	3398	3143	3377	3618	3720	3674	3277	3337	3225	3269	2869	3131	3417	3380	3650	3827	3705	3608	3666	3560	3422	4081	4477	3861	4086	3674	4010	3968	4213
10910	12224	10521	12550	8547	4924	4427	5342	8148	6608	7397	8746	8440	11846	11211	13131	11855	12638	12020	13206	15181	11661	12760	12138	13382	14644	12204	12753	13372	11886	9004	6335	4039	7844	11489	10831	9143	8530	8764	12237	12255	11090	6003	3807	3633	2743	9632	11468	12333	11761
14854	12413	14603	14533	14220	14981	12074	13361	13785	13618	11658	8458	8627	10307	9002	6850	8182	8301	7570	7639	9984	10285	10630	12169	10072	9939	11016	10500	11659	11078	218	9447	10988	2264	12348	14138	11687	11291	12209	12203	13890	15030	14948	16087	16502	16007	18395	17021	18544	17290
11713	17544	19953	26123	28263	25220	25607	27311	21162	15024	17418	18875	10317	7179	7900	9109	6363	4495	4485	3887	4596	4409	4343	4461	4249	4535	5853	8138	9492	9650	12376	12225	20145	22763	25734	23763	23688	18631	17104	19681	21890	23760	17951	16682	16867	12191	11370	12098	14987	11625
21001	20316	20075	20259	20377	20201	20857	20504	20123	19080	21233	20441	23551	22644	20436	19907	21840	21034	21265	20601	21664	24241	23902	25507	24041	23644	23078	23823	22268	25086	24750	24220	21880	22870	24371	22723	20407	19704	19430	20344	19380	19243	20179	22900	21511	23697	25155	26024	26718	25797
17109	12255	11462	14591	18429	12448	9178	19634	26335	35218	29411	41140	49907	62751	61173	77058	53585	50927	50913	70668	71910	73555	70730	62882	61683	66999	67829	64135	54138	62193	43760	167	14565	29938	30160	17102	18903	19376	18204	19097	21318	23638	22406	21131	20289	25072	24734	25623	21582	25650
8717	9016	9335	7283	8949	8770	8073	6471	5444	3089	4544	4981	4664	3287	2421	3004	2693	2098	2214	2752	2573	2042	2735	2968	2730	3464	3111	4558	5168	5768	8615	84	6944	7451	5117	6710	5032	6129	3715	4714	4130	5442	4361	5098	4501	3323	2930	4002	4381	2768
5296	4178	6397	4435	6109	5973	5350	5466	5805	7297	5189	6053	5736	4919	5287	4137	140	5444	5596	7285	8852	9428	9350	8991	5160	6531	8378	8634	9190	6786	6568	9526	8411	2884	6166	6357	5578	6072	7451	6596	5934	4500	3980	4577	5882	5755	6368	5991	5789	4982
3234	1938	1804	1939	1895	2183	2131	2335	1904	2468	2295	2393	2219	1883	1939	1830	94	2128	2143	2969	2159	2734	3442	3124	3759	3346	4174	4491	4888	5253	7022	6005	6192	1983	4431	5452	7533	7501	9131	9476	9904	10656	9444	10033	10993	9997	10278	9259	9805	8964
51222	54864	52255	52494	51801	52268	53749	53060	51466	53899	55593	50855	51063	51637	53588	52670	18156	55866	52848	53551	55219	53718	58766	54109	44332	45335	46575	49166	44416	47930	42292	36855	46990	44914	47447	47540	43464	44927	46313	47594	46981	48064	51030	50391	47749	46346	49657	50575	55131	48837
9753	9781	9600	9843	9772	9080	10238	10839	10901	10809	10932	11041	10899	10861	11623	11080	8044	7746	11016	10409	9088	9678	8350	8692	6517	7837	8161	7204	4848	2231	872	1265	8376	8754	9902	6029	4131	4959	4465	3511	5517	4349	4691	5713	2347	8573	6515	6131	5676	5216
24407	21261	26518	27918	30456	26083	29242	29550	28200	30040	28280	28894	26673	24681	27646	30847	242	24527	28600	24974	23024	27260	27472	26972	28145	28253	29703	26010	26942	27502	24237	24918	26749	8963	26443	26194	26697	26754	28284	23184	21640	23962	22531	18141	25112	27553	25517	26046	20020	16796
3242	2879	2177	2843	2677	2823	5736	6346	5383	4310	2790	3581	3761	4781	3928	3979	65	2637	2409	3615	5050	4497	3937	2760	2672	3406	2583	3106	2254	2636	3605	4288	4471	3394	5464	5816	4051	5206	4336	3717	4248	5688	5538	6656	7178	5012	5599	5363	5417	6769
166	140	161	162	178	184	190	143	158	157	148	162	150	175	164	169	148	170	133	147	143	169	156	133	149	143	137	159	163	164	168	156	193	140	135	191	114	152	181	152	182	152	176	140	200	171	149	175	179	149
5993	8245	7205	7925	10387	8883	8829	9337	7233	8769	9415	10071	10091	12550	11297	11686	11562	12341	12239	13364	13302	16049	15925	14922	15348	13598	14146	13398	14769	15258	15377	14591	15862	15003	15459	14834	13635	10811	12657	12112	13592	13083	14239	18248	17056	14601	345	13962	15546	11667
6608	6065	5572	6055	7103	5592	5877	5877	6220	6553	4911	5498	6466	6497	5796	4994	5345	5464	5861	7833	6175	6706	6162	6386	5978	4258	5551	6248	7021	6730	7032	1554	7458	6951	8294	7867	8047	7706	7937	8121	8135	774	6594	6391	7353	7344	135	7359	8350	8931
11757	12210	10388	10698	10286	9943	10228	10992	10034	11801	13776	13914	12261	14465	13189	12250	257	12796	12384	12241	14643	16701	14791	15015	14051	15555	15577	15433	13534	12848	13018	14631	15059	179	14943	12801	13851	14154	15106	14720	15159	14833	12494	13414	10962	12132	13877	13368	13639	12961
19326	20504	20505	20207	18754	20121	20180	21892	22125	21527	20963	19694	18246	16952	17202	16590	757	17630	17477	18261	18715	19024	19397	20078	20897	17873	18852	18699	18830	19066	19484	19394	19808	20747	21259	22678	19039	20625	19046	19525	17469	19253	19462	18545	20780	20122	20711	19106	17766	17841
691	578	490	863	823	615	1608	2550	3995	3534	2892	1778	1202	2177	2027	1543	1365	1238	1044	752	587	790	1132	1802	1261	1329	1736	1492	1390	1456	1362	1258	1331	1310	1084	1121	1102	2003	961	1701	1246	1413	2567	2034	1627	1775	1277	1242	1104	1133
900	914	1015	925	873	959	902	931	827	769	904	916	781	778	735	285	696	835	767	782	939	800	937	991	910	1034	833	818	782	890	1014	885	1133	1164	1017	1032	1102	1422	1333	1330	1281	1182	1091	1604	1705	1227	1473	1225	1267	1557
1116	1145	696	638	575	557	404	406	507	445	677	566	448	435	323	352	377	302	356	364	384	344	413	404	435	428	372	495	474	670	735	230	499	468	58	703	1209	1096	1454	1321	1167	1629	1724	1465	1272	1607	1649	1230	1428	1366
3367	3398	4053	3803	3440	4045	3410	3581	4145	4275	4362	3490	3331	3128	3291	2958	3107	2482	2521	1974	1693	1799	1475	1489	1080	1576	2269	2348	2766	2299	1810	2514	3892	3548	3898	2937	2976	3292	2267	2616	2856	2566	1627	529	436	450	537	358	384	334
868	929	932	1120	919	915	838	814	951	812	773	631	810	962	1025	1017	1102	1066	1042	1150	1082	914	828	1122	1168	1304	1312	1249	1207	1272	938	978	959	1256	1133	1220	1235	1183	1158	1142	743	635	784	935	833	782	549	706	780	778
7210	5263	4719	4020	3437	3853	3273	3649	3137	2811	3497	2848	2700	2459	2532	2565	2545	2689	2844	2717	2282	3066	3556	3635	3366	3341	2895	2918	3811	3852	4128	4620	4863	5014	4891	6729	5513	5134	4796	4616	5138	4470	3669	4570	3177	2878	3636	3459	3413	3216
18105	18264	24977	21848	19308	18638	22359	16774	13562	9060	9602	7641	7168	8096	9003	8690	7392	7021	5847	6031	6458	6305	4979	4010	3034	2966	2913	3176	2955	2955	2832	2845	2941	3089	3062	3012	3242	3143	3376	3657	3590	4019	5523	10015	10882	6797	5093	7005	15842	15074
367	373	547	543	644	411	239	321	450	402	342	320	292	311	293	257	312	408	544	585	620	715	875	1158	942	1039	1053	980	986	999	884	957	789	777	762	827	713	615	337	203	169	231	249	363	365	368	74	65	63	87
5191	6463	4857	6388	6088	6956	5560	8928	5126	5160	5155	4662	5580	6548	6089	5219	3832	4716	3834	3358	3785	3152	2477	2488	2786	3226	2976	2932	3295	3724	3300	3926	3885	4373	4894	4667	5301	6320	4695	4171	3261	3498	3701	5225	4281	3813	4411	5185	5628	5605
6023	4909	4448	4627	5749	5886	5786	5756	7820	6253	7099	6914	7227	6455	7238	8056	6601	7252	7229	7463	8667	8100	8885	8054	9479	9158	9745	10766	8474	6705	7124	5557	9014	10678	10798	11266	8128	9225	9121	7830	7664	10482	9351	7256	9064	6628	6288	6769	5897	5547
26371	12116	14879	14683	10872	9928	8047	5879	4263	4324	3419	3072	1962	2188	2353	2569	2286	2164	2087	2217	2266	2061	1977	2188	2559	2162	2260	2100	2104	1661	2211	2067	1509	2010	2343	2420	2373	3167	2264	1912	2276	2408	2373	2534	2378	2343	2306	2220	2431	2507
2662	3394	1751	1708	1492	1433	1518	1642	1721	1598	1385	1282	1281	1340	1195	1155	1178	1075	1200	1302	1289	1163	1174	1145	1094	1025	1208	1075	1221	1189	1431	1144	1141	1281	1491	1286	1309	1252	1341	1154	1117	1294	1420	1528	1876	1535	1868	1861	1770	1911
1196	1383	1623	1443	1509	2291	5055	2764	3806	7676	5663	4869	4321	2225	2165	1738	1218	806	572	558	639	671	760	923	1073	1255	3040	3047	2399	1252	890	1001	985	1151	1242	1498	1815	1327	3895	1437	2015	1914	3066	3370	2885	3016	2864	2471	2612	2416
22286	22627	17307	18293	17167	19299	15265	14889	12783	599	757	4198	3366	3684	577	638	649	3433	1241	4659	7049	7135	9150	8140	6879	8019	8123	10112	10413	9373	10994	10901	11410	12109	11118	12012	11375	12274	12320	9760	11034	10295	8339	6631	6518	7654	6065	6787	8703	8028
7004	7067	6034	6165	6079	7516	7063	7127	5901	6119	6062	4509	4735	6372	6252	5706	5921	6357	6356	6418	6131	5546	4643	3092	5379	5913	6390	6867	6800	6628	7749	7605	8826	8489	7909	7866	8846	8786	8065	8644	8586	7862	7822	8097	8243	9388	8957	8858	8138	7506
1231	933	1061	1234	1012	1207	1486	2156	1512	1899	2418	2003	1602	986	1058	629	514	435	380	165	333	349	405	454	460	494	502	617	572	522	979	868	525	416	558	490	432	444	474	567	619	572	719	74	65	513	654	543	631	709
1898	1897	1963	1921	1824	2287	2364	2210	2051	2039	1593	2337	2883	2129	2229	2139	2836	1904	1599	1183	1284	988	1086	845	797	1257	1285	1714	1772	2474	1592	1281	1124	1578	1472	1634	1195	1182	1388	1341	1436	1782	1405	1428	1365	1332	1385	1407	2034	1795
5386	7014	10617	10944	8137	7780	9875	10366	11652	13273	12723	12626	13126	14108	14376	14093	14010	13157	11163	13771	12491	13441	13703	9457	11744	13507	13983	13334	12695	13981	14976	16638	13434	15320	8719	10489	8111	15273	11320	13250	13001	11857	14527	11327	13224	6747	8242	7133	6168	7701
1022	1348	998	918	1316	1388	1473	1462	1709	1722	1590	1257	1270	1716	1488	1217	1333	1341	1761	2505	2364	2769	2095	2033	1777	1246	1259	1772	2091	2242	2162	1440	2221	1629	1357	1399	1555	1129	1259	1705	1375	1188	1123	1077	1012	853	641	560	570	643
8549	7329	3029	3779	7278	5334	2099	2064	1577	1480	1408	1130	1085	1105	1128	1357	1174	641	1903	2228	1214	416	1142	1440	1042	1001	1505	1888	1507	1181	1670	1005	952	1147	1384	1060	1113	1252	1447	2138	747	317	448	2335	2449	2163	3182	4539	4867	5373
26841	20425	18297	21496	18735	19713	17293	15927	13323	18095	12824	14855	17832	19659	21969	24182	26072	29433	28119	28602	30033	29326	29732	28580	31471	30719	32700	34597	30600	33463	33839	33081	33786	33166	34623	31000	32645	32150	32356	32939	29176	29330	32012	30293	28909	28418	27335	26130	28341	28581
8289	10300	10243	8840	8751	7121	8012	9577	9800	8412	7861	8098	7535	5085	5355	4963	5947	5592	6206	5240	5629	7286	6966	7789	7705	6539	8001	8582	7944	9126	10186	8810	9676	9101	11468	10424	11553	9896	9871	9497	7930	7528	8841	7319	6552	6379	5066	5717	5628	5941
2459	4871	4959	6770	3959	6960	5639	6786	6793	4397	4652	2826	3277	3437	2234	2915	4086	3531	3237	4670	4771	2642	5899	5732	7302	7079	6699	6134	5490	5508	5849	5320	8399	8744	7745	8481	9072	7337	6933	6323	5887	5336	5359	6049	5868	5116	3980	4001	4469	4323
1026	929	1010	1260	1120	1257	849	1248	1595	2270	1686	2299	1723	2234	1872	2368	1838	2794	3585	4411	3940	3880	4056	4019	3901	4125	3926	3192	3319	2666	2244	1962	1946	2256	3129	2272	1448	2291	2369	2074	1271	1468	1929	1830	1299	1192	1233	1274	1047	1067
515	369	432	509	547	544	669	614	605	429	387	460	489	687	1070	1081	917	1046	923	957	830	952	932	1459	1175	1378	1331	1608	1195	1145	1407	1454	1806	1148	1289	1244	715	1268	783	995	1656	1574	1242	1359	1485	1294	1430	1678	1397	807
3593	2692	2810	3400	3474	5231	4050	4238	5258	7403	7406	7192	6113	6192	5769	6859	3561	3340	6563	5589	4009	4847	3970	3997	4415	5455	5993	7743	7232	6676	6633	7557	6873	7014	3700	3126	2948	4076	3120	2473	3058	2884	4413	7062	6861	5276	5457	4827	3433	4602
3361	3910	5388	4215	4314	4175	4233	4359	5177	5411	5676	5565	5415	4447	4601	4203	5145	5671	5105	4657	3130	2881	2589	2654	3105	2524	3355	3629	4651	5727	5800	5469	5302	5310	5415	5436	6505	4875	3837	4271	3810	4185	4100	4005	3721	3128	3358	2472	3688	3487
7227	8429	7268	6345	6187	4460	4482	3504	4120	3881	2646	3988	3585	3076	3801	3190	4730	4228	3270	3390	3633	2706	3653	2807	2855	3465	2631	3404	4462	5574	4941	3306	3434	3518	3925	4036	4293	5210	5074	4922	5692	4928	4071	4723	4763	4319	4129	4192	4777	3933
1694	1737	1301	1702	1641	1354	1341	2707	2323	2522	2476	2584	2328	1141	1752	1818	2439	2670	2964	2767	2378	2570	2431	2993	2941	3469	3294	3770	3999	3820	3710	3540	3945	3880	4026	3839	3356	3636	3412	2523	2945	2804	3278	2667	3753	3334	3108	3045	2419	2281
307	256	300	296	271	247	237	189	238	182	197	152	189	199	216	210	195	209	181	179	191	209	173	196	163	204	163	159	187	213	187	147	153	163	179	171	131	173	163	170	133	152	161	151	140	163	129	168	109	157
18216	18077	13271	14346	18209	16397	17920	19636	21387	20191	18395	19534	21290	20198	21167	18872	19015	16939	17642	15379	13357	11803	12615	11689	13114	13278	10386	9372	8896	10039	10878	11615	12147	11050	10113	8934	9534	8267	9831	10830	10254	10556	10675	10693	9215	9739	8231	9126	9910	12137
10380	9096	8145	9257	11881	12464	11727	10419	9572	9354	9831	10998	10939	11150	10419	10330	11301	12407	11938	12571	14545	13848	13408	12654	10963	12403	11870	10542	8426	8366	8119	8138	9006	4153	7233	6719	7398	8348	8368	7397	6373	6917	6624	6555	7369	7710	6824	7013	6734	7401
327	329	350	281	313	256	237	194	192	204	175	127	168	143	163	162	153	145	149	152	146	154	121	117	153	150	133	164	148	153	163	188	170	173	192	158	141	133	153	155	152	192	194	201	164	177	182	140	157	141
5103	6684	5755	5742	6561	5068	4723	4517	3475	2740	2870	3881	4306	4001	5079	3939	4892	4279	4211	4484	6478	6368	6372	6768	7332	8065	8095	8889	11089	8164	8701	10566	13240	13851	13392	13775	14834	14782	13682	13445	13449	14009	14555	14589	13250	14059	14421	14161	13415	14940
2468	2907	2783	2836	3341	3741	3491	3075	2565	2370	2418	2258	1665	1964	2158	1999	1889	1672	1961	2519	3383	3331	3383	4076	5379	5486	3781	3577	4936	4513	3930	2420	3309	3895	3236	2864	2601	3093	3510	3197	3307	3449	3976	5047	4692	4327	4449	6198	3711	4734
382	315	1852	2046	2024	2185	2007	1849	4725	8340	6780	5905	8334	5551	7082	8520	7313	5254	7584	7829	8270	5100	4434	6226	5601	5231	4360	3152	3146	2752	2808	3224	2578	2213	2977	1856	2191	1968	2457	798	1216	2977	3765	1386	1388	679	1623	1797	1875	1775
19391	22133	25804	34891	30453	29200	30738	30961	33518	32954	31165	30348	27845	28073	29302	28495	26818	28484	25503	28818	27402	26806	25901	26912	23061	21388	25055	23024	26610	20594	22179	20837	21607	20768	25098	16921	12645	13952	13337	18403	16420	10466	9904	10939	12332	12248	13720	15199	15849	17073
2375	1648	1468	825	756	801	886	1200	845	937	802	773	635	562	755	572	771	663	1426	3844	2743	3108	1705	1956	1262	2357	1536	2466	2432	2358	1891	1378	1591	2343	2878	2276	1931	2263	2756	3336	3365	3176	3502	3148	3852	4438	4347	4472	3867	4192
785	765	782	799	804	807	765	636	402	351	302	430	358	339	278	385	483	540	325	339	341	288	216	270	280	188	181	254	349	322	177	253	255	369	335	227	276	305	338	186	286	348	272	348	337	358	378	195	211	248
544	499	578	386	362	392	387	361	378	366	440	370	311	401	390	357	245	264	330	285	302	299	235	271	280	246	235	237	216	246	223	200	209	218	234	242	200	197	225	176	179	152	191	185	201	187	135	135	149	169
60	105	106	64	64	73	75	61	88	65	77	78	62	79	67	49	58	77	80	85	67	64	41	57	56	64	60	54	57	62	59	53	58	57	48	62	50	49	54	38	39	49	56	56	47	37	35	39	60	59
247	290	273	235	226	206	171	218	204	182	254	186	205	192	151	199	146	190	166	146	139	137	159	172	155	139	123	163	167	147	153	122	123	133	132	136	139	124	135	121	114	104	151	122	125	109	112	122	145	114
902	307	298	922	658	644	602	746	759	765	993	1087	1099	964	938	1060	973	1073	980	773	855	697	867	717	686	649	872	1110	1073	1024	1253	1238	932	868	731	1080	873	1019	1002	911	846	738	802	826	778	1009	1057	1261	1245	874
4894	4532	3226	2894	3756	2858	3028	2684	2744	3120	1994	2234	2768	2537	2272	2259	2088	2525	3288	3592	3230	3177	4031	4865	4543	4293	3167	2918	3025	3593	3905	3663	3871	3498	4590	3536	4169	2724	4209	6513	5320	4010	3979	4106	4260	3293	3438	3853	3642	3576
19094	29195	22989	26528	24603	22558	18305	19579	36321	31479	34798	44961	40405	37757	40482	32798	40225	52001	46566	52657	57518	68180	59060	60726	56777	64388	67664	73682	70846	68365	69785	67075	68863	68548	75155	87995	88721	89134	83551	39506	24225	35422	56228	32559	25674	28177	42134	76221	78642	60551
4554	6327	6106	6232	6581	6003	6214	4771	6430	5202	5097	5599	5928	5440	5552	5844	4900	5598	5653	5887	5427	6565	5168	5802	6719	7100	6790	7345	6913	8003	8395	8457	8297	8644	8090	7508	7608	7758	7732	7478	7517	6668	7696	6803	6674	7450	6649	6409	6544	6221
19531	16181	22824	20347	18067	20085	18305	19107	17182	20611	24476	27442	20759	23162	19474	17226	13779	15373	15882	15703	17287	16488	16702	20407	16081	15881	15509	16342	16863	19110	22793	19751	21486	23764	23010	19828	20627	22193	23291	25762	24306	24697	20956	22453	23757	17796	16733	18386	14975	16184
8678	8100	6788	7813	6819	6650	7006	8059	8545	8913	9866	7972	6829	7174	7960	7494	6125	8499	9477	10263	9518	9157	8450	7498	7729	5603	5597	5247	4714	4928	5413	5852	5409	5400	5066	4446	5000	6528	5410	5652	5469	5876	4782	4968	5288	5125	4711	4944	5059	5689
3053	2712	2553	2296	2407	1965	2105	2761	2821	2606	2239	2679	3122	2761	2529	2778	2744	2839	2832	2451	2942	2887	2508	2978	3164	2433	1972	2875	2379	2459	2145	2166	2104	2530	2976	2106	2126	2350	2325	2025	2165	2594	2659	2713	2804	3120	2855	2845	3310	3142
425	355	389	340	333	391	320	285	271	358	297	283	324	204	251	233	259	240	212	189	244	262	229	195	258	207	210	195	203	243	180	214	235	196	190	223	178	222	238	204	181	221	212	214	214	193	176	215	217	242
594	572	514	473	499	458	511	440	395	337	323	326	400	320	324	323	363	398	296	330	316	325	315	303	323	290	312	331	294	365	237	313	300	275	269	267	287	269	275	254	227	292	236	210	190	226	229	241	244	265
3050	2711	2547	2302	2399	1976	2105	2768	2818	2608	2231	2668	3107	2754	2557	2781	2756	2837	2836	2447	2954	2883	2512	2984	3163	2440	1978	2880	2377	2458	2141	2163	2104	2519	2973	2107	2128	2359	2320	2041	2160	2597	2654	2724	2804	3116	2854	2856	3315	3143
17640	16375	17260	16061	16620	15691	14542	15059	11710	11917	10710	11165	12803	11843	13439	15025	16141	17032	15106	13536	12314	13120	15531	17659	15523	16331	15460	15926	17479	16792	16350	15039	17646	17376	17195	17263	16998	17012	17295	14330	13002	12772	16556	10609	9768	8434	8709	6318	5648	5930
16006	18015	17624	17867	17634	17822	15202	16504	15288	13432	12197	12401	10506	9958	7003	7008	6849	6437	7368	8037	7129	5792	4289	3890	5425	4044	3740	6674	6634	7111	6486	8211	8965	9414	8868	9915	12339	13157	12466	14156	15927	19101	19502	18447	19266	18947	18675	16729	14861	13827
17516	17105	16610	17368	16916	16720	17342	16416	16419	15763	15821	14360	14688	15229	14502	14705	13369	14048	13777	13206	15462	14230	15056	15398	14392	13862	13483	13132	13259	13319	13743	14656	14204	13827	14359	15370	15687	15211	16512	16299	14271	15545	15766	15372	15912	15058	17877	18846	18849	18558
140	111	122	121	119	94	77	100	98	96	95	114	85	68	66	67	72	51	69	67	76	60	69	65	76	56	60	63	63	69	84	97	75	73	63	67	67	65	59	94	72	59	76	78	95	83	72	50	65	60
436	781	386	561	1092	883	785	647	737	834	968	1008	928	894	909	859	1076	1128	1539	1626	1675	1234	779	1220	1389	1187	1457	1605	1353	2153	2068	2931	2521	2181	1945	2225	1913	1784	1662	1621	1481	1686	1426	1050	1353	1513	1346	1221	1782	2374
15755	12316	11578	8833	10155	7137	6561	7241	7677	7557	8263	9417	11834	10540	12197	11624	11012	10995	9783	10641	9223	8477	8423	7467	7164	7078	6895	6978	7173	6504	7603	7571	6915	7434	6998	6826	6965	6289	7047	6649	5902	6262	7094	7974	8459	8579	6803	6528	6989	6961
15602	15454	13918	13262	13502	13686	15288	15771	15536	15704	15657	15831	16467	16542	16543	17478	16873	16812	16155	16647	16900	16680	16523	16652	16810	16081	16357	17145	17578	17450	16699	17080	17863	17808	17649	16644	16341	18026	17553	17677	16918	17893	17132	18749	19298	18009	18991	18463	18781	19362
1481	1401	1441	1416	1422	1346	1304	1298	1336	1242	1285	1194	1150	1141	1048	1087	1089	941	991	1052	1125	1066	1142	999	1037	1041	1047	958	1002	996	947	1013	1012	1018	947	988	908	982	941	950	917	888	954	977	947	969	913	872	910	829
5597	6211	11955	7427	9700	5587	15989	5281	5845	5661	5047	5623	5890	6000	5294	4765	5035	5360	4759	5163	5698	5665	5674	5188	5140	5350	4845	5853	5137	7976	10577	7512	5066	4798	5013	4497	4630	4697	5400	5032	4924	5044	12332	4646	4724	4734	4634	9239	8964	6054
10129	16807	12586	18072	22835	22551	21795	21749	21327	22830	21678	20799	21085	19043	15661	14628	19150	18896	23616	20576	21538	21616	16298	21803	21526	21381	20061	16682	13033	18355	11691	18518	18602	16954	15447	13094	15738	14284	15848	10896	10725	5729	10284	17907	18490	11109	10278	12967	10277	12041
13372	12600	12422	12998	11743	11831	11311	12520	11094	11497	11802	11493	10391	9808	9241	11639	11658	12092	12952	11709	13079	13049	12801	13054	12474	10467	10858	8455	9926	11495	9301	9507	9893	9941	11045	11814	8578	14350	13784	12927	12586	11567	13569	13391	12905	12266	12617	12578	12124	12543
12841	12556	11237	10980	11578	11394	11236	11754	11794	11646	11539	11460	10891	12490	12981	13670	13506	13100	12868	12653	12896	13346	12513	12512	12142	12780	11716	12262	12293	11992	12398	12395	12608	13449	13323	13550	13053	13113	12907	13000	12838	12630	13825	12860	12721	13347	12779	13332	13988	14358
25707	23283	19345	19204	16348	17942	13851	8378	14546	16106	12229	17137	13465	10386	13070	12137	9820	13657	12250	13929	12759	9413	9669	7890	7601	11168	10283	7657	8946	7185	7018	6550	4868	5011	5345	4482	7175	6799	4589	5144	8364	7842	6836	7350	7542	8331	13337	15777	16808	15319
12419	13415	10310	10578	8906	8122	7533	8963	7007	9539	9771	9908	7909	4767	7276	5926	7819	5718	4075	5812	8279	6136	7666	7840	8346	10763	14295	12851	13081	13033	16416	14066	15096	16394	14430	15587	15335	15626	16632	16797	14834	14888	15903	15346	15809	15872	16179	14726	12149	9878
12161	10854	9817	7616	8627	5625	4873	6267	6299	6467	7134	9258	9401	9103	10117	9692	9276	8973	7711	9042	7617	7148	7194	5694	4942	5211	4995	5036	5209	4586	5882	5847	4808	5441	4820	5066	5160	4361	5262	4559	3766	4370	4927	5713	6331	6900	5005	4742	5042	5299
10650	10699	9070	8133	7652	8698	7781	8315	8632	8610	8732	8813	7914	8042	8363	8873	9991	9610	9322	8164	8773	9228	8909	9602	9380	9713	8754	8923	9309	9174	9142	9807	8602	9311	9125	9097	10001	9907	10154	9790	9813	10536	10456	9848	9186	7861	8367	7664	7507	7183
3337	3251	3072	3918	3807	3164	3009	3489	3423	3255	3867	3225	2808	2881	2202	2229	2106	3484	3332	4370	4218	4524	5005	4807	4374	4146	4566	3689	3408	3341	3498	4187	4393	3941	3903	3730	3981	3954	3852	4057	4088	3611	3860	4122	4023	4554	5172	4380	3121	3649
2833	2485	2457	2909	2780	1550	1382	1500	1342	1233	1128	1112	1265	1725	2071	2237	2896	5021	6100	6035	5958	5467	5808	3979	3642	3317	1467	1571	1710	4552	4797	5239	4367	3671	3278	2340	2417	3426	2223	2436	2410	1888	1774	2208	1887	1805	1959	2063	1951	2076
7151	7647	7397	9015	11718	11740	10338	10819	14087	6941	7965	27181	28783	27611	27847	27212	25273	20269	18722	16259	14858	14830	13798	15382	14384	14130	13242	11046	12340	12577	11267	11247	10876	9982	12599	10912	10864	11879	13203	12762	12711	15728	16468	22224	22582	19136	21296	21205	18275	17301
12745	18816	14395	18260	19064	23018	26510	35803	38602	32545	43420	43633	42362	44339	43718	29504	27443	41642	29654	27230	36597	38489	38569	41901	42303	39956	40225	40532	39812	38739	41424	37061	28098	29284	29096	30006	41813	45390	30599	33342	40678	43078	42765	45025	43484	42945	42713	43554	43348	43889
4567	3998	3959	1490	842	620	603	736	729	628	788	852	815	888	819	838	1097	856	713	955	816	854	843	880	961	722	753	935	941	1143	1947	1240	1689	3140	3132	2864	3524	2907	2956	3055	2716	3284	3372	3929	3794	3833	3755	4374	3611	4365
10208	10748	12554	12337	11923	9945	10208	11741	10635	9831	9664	11748	10884	9154	9362	11024	10932	10215	8912	5937	5284	5371	6455	6493	6997	9194	9190	8168	7215	6504	5837	7659	6477	7831	10751	8818	9045	11459	10077	10268	9232	10936	11765	12671	12543	11808	10401	9743	8904	9346
16058	13778	16351	16141	17541	17200	16455	16542	16066	15695	17238	17563	16841	16654	17041	17072	17420	16948	16980	16281	17087	16582	16957	17653	16646	16858	17998	16704	16434	17302	17452	15980	16576	16708	15675	16039	16287	16921	17196	16214	16542	17258	17078	16030	14370	17063	15562	15837	16149	13821
5180	4370	7226	7265	7215	6310	7537	7833	7300	9333	8161	6995	7700	8342	7387	8596	8033	7926	7405	8166	8388	9090	8581	7219	7743	6766	6073	5691	5409	6572	8052	7882	7063	9069	8407	8002	9200	9337	9831	8268	9116	9191	9791	10209	10334	10014	9520	9474	9784	10534
3674	2813	5216	4047	2237	1399	3008	2505	3816	4129	4969	5723	5357	6714	6566	6085	4998	5537	4843	4037	3758	2839	3795	3672	4749	4214	4590	6405	5592	6053	5943	5898	6498	6339	6344	6537	6544	6012	4794	3783	3716	2823	2522	2630	2881	2825	4006	2569	2552	2774
16583	12974	14153	12857	10870	5755	4549	5520	4981	5479	7046	4814	4201	5750	3752	3384	4755	3985	4684	4002	3503	4133	4173	4495	5228	5754	8936	5221	6510	6604	7931	6657	8673	7592	7452	9011	8405	9270	10028	10065	9945	7289	8100	9904	9801	9954	8194	11957	10699	9581
7109	7141	3858	4113	6574	6624	4602	4231	4531	3499	2940	2546	3827	4053	4957	4937	5644	4794	7442	7259	6858	7361	6974	4983	6038	5338	4526	4979	5204	7964	6885	6106	6040	4952	4408	2544	4019	3798	3178	3484	3448	2362	3199	2947	3439	2458	2274	2330	2144	2514
4153	4884	4218	6513	7181	4568	4919	4321	7529	7708	8888	6388	7862	8097	8201	6810	7276	7198	4889	5989	4633	5223	8626	8143	7735	6755	6575	5751	6553	6006	6340	6336	5880	6929	6089	7204	8436	9780	9319	9054	8549	9413	10467	10717	10573	8713	8856	8093	9695	8921
5749	4548	3930	4637	5361	5577	5494	5055	5583	5923	5391	5446	5837	5289	5476	5370	4616	5549	4974	5763	5654	4379	4515	3343	3141	2655	2543	2951	2612	3935	3883	3391	5652	5012	5050	5776	5562	5289	4565	4489	4509	4039	5148	5791	5592	5957	4998	5444	5685	6040
5669	5106	5051	5258	5185	4630	4530	4263	5061	5620	4452	4460	4982	5936	2015	3729	6040	6190	4958	91	43	40	63	4235	4500	4233	4397	4959	3958	4297	4971	4860	4927	5302	4918	4638	4951	5191	4821	4058	2429	4291	5035	5247	4797	5752	6166	4795	30	43
19156	18775	18815	16234	14853	19250	19331	17807	15000	15365	13707	13053	17968	14470	15612	16133	16013	17690	17457	16431	15161	16257	15385	14084	12601	13616	12290	15366	16118	13286	13503	13113	12291	12442	12655	12273	13597	12351	11761	9971	10425	12161	13930	12883	14886	16767	11938	16442	17703	16168
32145	33472	33152	28153	33766	32842	31877	26816	25075	22006	22851	22454	22866	22061	22245	24937	27242	24772	26175	26189	29130	30438	29697	30103	28676	27969	27972	28206	27829	27448	25953	28305	29366	27467	27586	26892	25613	25921	27255	26331	28156	28359	29860	27944	30036	30253	28882	27842	29548	29105
6555	3055	3485	2606	3792	3347	3466	5543	7381	7577	8162	5566	11781	7852	5810	6372	9540	9532	8212	5694	7649	5997	5205	1658	3182	3433	4632	6619	4029	5882	7785	9007	10448	8880	11131	12096	11226	10352	11926	11463	10677	10467	11644	10958	11411	10566	11223	11584	11642	10829
4518	3565	2954	2126	2341	1983	2164	2641	2176	2029	2683	3786	5924	4216	4535	5396	4893	5577	5372	5128	5206	4866	5326	4988	5492	4756	4389	4445	5217	3909	4090	5197	3961	2499	2113	3508	2015	2960	2432	2390	3135	3160	2387	3519	3531	3299	4914	3384	3840	4529
4819	3700	3995	2999	2022	2650	2228	2660	3019	4112	3712	3199	4423	3732	3733	4850	3650	4335	3876	3912	4204	3901	3994	3793	2899	3573	3488	3605	3750	3797	3260	2549	2473	3987	3932	4145	3476	3638	3819	3728	3344	3852	3815	3515	3036	2697	3267	3576	3291	3434
12053	12783	13343	12327	12645	10728	12622	13322	10825	12366	11602	11628	9628	9429	10025	8865	8119	8162	7515	6980	7576	6847	6988	8798	8870	10536	7463	9429	7950	7296	6510	11158	11097	11217	11031	11192	11178	12520	11167	11171	10868	10823	11422	13292	11897	10484	11699	11999	11009	13377
5051	5060	4901	5196	6148	4661	4962	5665	5174	5025	4872	4678	4207	4931	5135	4519	4078	4174	4121	4123	4468	4354	4148	4237	4277	4584	4455	4899	4982	5359	5324	4897	5094	5445	5714	5542	5838	5943	5087	5226	5716	5440	5747	6125	5885	5376	4892	5360	5385	5300
12222	11436	11173	11160	10872	12513	13548	13032	10885	11096	11510	10514	9951	11408	10260	8093	6261	11804	11093	11842	11480	13036	5737	11524	9516	10824	12214	8328	9439	9814	10079	5965	9799	271	357	893	8034	8715	8023	1025	738	8079	11043	2733	1230	8717	9159	9249	9732	11363
2257	2334	1738	1669	2216	2338	1309	1676	1310	1719	1677	1841	2157	2062	1971	2136	2187	2266	2270	1465	182	220	2380	1924	2106	2258	1891	1793	1818	1986	1741	1633	2072	1918	1797	2267	183	1614	1341	2453	2441	2185	2113	2024	1890	1866	1826	2065	1704	1751
8854	7074	6439	7201	8448	8601	7705	7771	7763	7786	8144	6280	5853	4618	7063	5872	4893	5693	7433	6699	8203	5899	7913	7321	6967	7731	7497	7358	7078	8298	8491	8051	8187	7506	7767	7573	7472	8360	8401	10585	9563	7937	8611	7178	6455	5587	5386	4163	4057	4400
3538	3176	4065	4398	3813	3495	4306	3847	3773	2180	2110	2317	3326	4125	1486	1449	2434	1717	2722	2663	3019	3294	3261	3451	3632	4198	4556	4334	4142	4030	4070	5266	2216	3959	4541	4324	4175	3862	4634	3902	4621	3896	5044	5636	4627	4277	4847	4879	4577	5044
5704	5533	6507	6534	6030	6395	5332	4101	3844	2858	2813	2086	2091	2412	1832	2185	1956	2476	2265	2688	3236	4241	3211	2814	2817	3927	5010	4613	3843	2785	4466	2892	4556	5242	5347	5549	4305	1817	5780	3887	4343	3811	1825	1770	1709	1537	1647	1683	1779	2143
1239	1467	1490	1693	1811	2022	1933	2081	1979	2155	2213	2163	2136	1767	2076	1527	1690	1946	1450	1262	1423	1361	1577	1585	1498	2027	1531	1322	1632	1361	1441	1234	1752	1787	1939	1830	2081	2004	2169	2459	2408	2213	2350	2096	2285	2062	2536	2477	2606	2522
2531	2850	2414	1900	2556	2342	1512	1795	1194	2766	1682	2376	1676	584	657	696	875	1029	920	801	1246	1134	2432	2638	2410	2221	2165	2228	1965	2213	2587	2144	2089	1895	1956	1706	1342	963	762	522	614	824	647	472	581	600	569	909	1092	1167
6221	5253	4518	3500	3034	2655	3149	2890	2447	2403	2896	3272	3069	2708	3978	3002	2751	2252	2051	1810	2105	2495	2778	3037	4014	5371	5074	5239	3758	5475	5112	5163	4092	4056	3577	2860	3264	3101	2631	2137	1971	2314	1527	1927	1515	1602	1741	1731	2150	1738
4999	5198	5143	5250	5261	5312	4817	5692	5189	4900	5149	4014	4787	3839	4409	4303	4434	4099	4495	3888	3740	3265	3415	4061	4281	3970	3590	4434	3540	3622	3978	4140	4235	3819	4339	4073	3733	3742	4070	3829	3777	4704	4401	4028	4449	4253	3961	3929	4616	4955
2370	2209	2016	1583	1517	1280	1309	1121	1097	1080	2026	2514	4301	3766	3459	5546	3597	7495	7839	6978	6613	5577	6401	6591	7243	6830	6811	7401	6685	6753	6834	6731	5030	7353	5781	8240	7495	7341	8321	7494	7517	7591	7176	7528	6243	6813	5259	6858	7513	7936
11214	14874	15133	18117	15169	14365	14673	14221	13498	12391	12736	13316	13813	13620	15495	15002	13778	15232	15954	13738	14578	15236	15211	14532	15088	15025	14921	12877	14001	11019	9382	9909	13206	12640	11443	9089	10596	10335	10083	7675	8019	8598	9001	8640	7298	8145	7217	6801	8938	8916
714	294	351	329	543	462	889	1030	1816	2322	1447	917	697	517	459	670	405	422	549	657	585	410	603	559	682	672	346	418	592	447	381	479	591	1271	1384	1612	1033	537	829	1233	803	646	544	987	591	537	790	892	694	730
2888	3412	3154	3258	1088	1391	1349	1293	2349	2436	2658	3189	2807	2755	2317	2602	2355	2817	1846	1525	1243	1253	1190	1374	1098	1341	1721	1339	1808	3369	3293	3075	3235	3291	3317	2965	3108	2451	2721	1802	1961	2330	2882	2077	3324	3226	3072	3377	3513	3626
1554	1343	1750	1883	1852	1921	1747	1617	1738	1710	1189	1045	1172	861	978	738	888	864	908	898	758	613	662	742	611	664	664	1051	1099	765	1005	1253	837	814	800	1017	959	1016	870	802	785	876	1002	1170	1066	1098	1177	1027	867	891
2383	3631	3517	3881	4159	3895	4071	4228	4289	4068	3437	3074	2534	2675	2470	1628	2331	2543	2551	3253	2809	2087	2250	2129	2205	2286	2239	2331	2432	2167	2317	2216	2278	2167	2486	2133	2163	2338	2250	2379	2305	2381	2502	2492	2324	2172	2004	2332	2290	2444
4004	4442	3290	4050	4146	3600	3853	4021	4206	3770	3509	4045	4343	4357	3618	4103	4344	4899	4242	3776	4055	4420	4065	3668	3204	3409	4023	3835	4118	4395	4148	4406	3753	4241	4105	3935	3216	3851	4498	4317	4055	3868	3987	3636	4087	3655	4537	4441	4818	4469
4415	3979	3926	3872	3155	3075	2846	2803	2564	2795	4031	4454	3251	3494	3740	2835	3899	1706	1456	1210	1839	2257	982	716	790	831	918	1341	2158	2103	1650	2263	2955	1661	2111	1035	962	1197	1116	800	1144	1778	969	944	673	741	519	825	880	931
17255	15458	15076	17563	12634	11777	12071	10564	11595	11215	12253	10643	6061	5012	9044	9021	9641	6463	5369	10114	10114	7305	5439	7005	5508	4131	6704	9523	9154	11881	12463	11151	12203	13207	12903	11016	13409	11803	11822	9762	13066	13332	14966	16250	14784	14621	13071	12518	14710	14270
2714	2842	3902	4114	3766	4300	4280	4197	4509	4175	4284	4621	3852	3922	4602	4035	4402	5188	4258	4612	4242	4434	4371	4266	4317	2982	2160	3399	2991	2330	2138	1800	1423	854	854	666	675	656	577	616	594	575	649	743	669	602	574	1082	1031	1624
12855	11906	13023	14293	14115	13558	12321	8759	5404	4681	4340	4817	4485	4550	4531	4602	4231	3828	3941	3553	3327	4376	4122	5738	5499	5568	4900	4550	4832	4214	3612	4117	3772	3324	3263	3318	3443	3653	4016	3830	3463	4158	4275	4822	3897	4022	4156	3498	3951	3539
935	1221	1362	2019	2307	1767	1878	1097	1864	971	1731	2099	2712	1955	2465	2189	1908	2406	2339	1741	891	1339	1380	1471	1249	1986	1317	1645	1040	1040	806	981	1537	1577	1771	1998	868	1206	1962	2079	2057	2151	1353	1770	1637	2075	907	1380	2056	1566
21985	21882	20282	22345	22264	19950	19290	17451	19032	18335	15861	17085	10658	3711	10153	18820	19940	17821	17660	17399	17686	17751	19078	18397	17684	18620	16294	14855	15816	16569	15766	15145	17071	16707	16470	16063	20260	21769	24626	24531	23238	28829	29913	28854	24552	23894	23132	26187	24447	24921
899	787	817	805	521	748	774	672	586	444	445	537	551	510	453	526	399	585	664	692	606	696	600	660	761	601	580	595	650	585	389	364	306	644	637	648	544	570	690	522	524	533	597	661	539	406	331	627	392	590
3753	3487	3817	3386	4089	3601	3495	3869	4696	4002	3797	4234	3630	3818	3887	3367	3483	3063	3384	2656	3353	2881	2822	4450	4372	5421	5008	4668	4946	5138	5053	4852	4533	5018	5117	4588	4723	4435	4605	4732	4435	4411	5116	4498	4498	4313	3881	4582	4555	3920
7975	8078	7502	7715	7776	7389	7623	7804	7713	6837	7609	7431	7331	7135	6988	7677	7419	7397	7225	7426	7129	7067	6175	6742	6830	6970	7114	6626	7215	6241	7293	6901	7053	7408	6855	7410	7286	6697	6713	5707	5236	6342	5781	6094	5794	4754	5517	6096	7083	7326
15508	15623	15112	11540	11801	13196	13180	8524	12475	10338	11531	12121	13581	15137	14696	14738	12855	13040	14684	14384	11988	12446	9065	11497	8627	12775	13753	14155	13600	15074	14744	14052	9618	8016	7056	6969	8848	6336	7043	9550	10789	12918	14994	14837	15043	12615	12845	9924	8990	10216
2293	958	1459	3017	2305	3474	3666	2845	2316	1364	1033	1195	1416	1814	1794	1275	1162	1364	2123	1509	1596	2010	1518	1166	1511	1348	1538	1506	1645	1604	1754	1501	1311	1185	1454	1505	1280	1127	1062	841	1111	1569	1161	968	1057	1269	1193	1327	1350	1589
1160	10972	9553	9367	9214	9719	10473	10206	11603	10365	9050	8515	9797	10606	9533	13410	13898	14325	14639	13956	14254	15039	14322	15027	14512	13342	14190	15047	15417	15109	15328	15441	15550	15711	14955	14685	14073	13947	15280	12193	12019	12658	14705	11573	10702	10549	12858	11311	13251	12997
2988	1929	2235	2202	1618	1355	2307	1142	1444	1282	918	1227	1083	1982	1384	964	1297	2857	2453	1962	2441	2921	3174	3033	3316	2924	2818	2421	2524	2329	2256	2677	1932	3250	3356	2615	2865	3949	3536	3322	3163	3101	2807	2688	3097	3211	3345	2667	3232	2951
15923	17706	15360	17120	16511	14512	15196	14518	15271	13124	11737	15445	16186	16571	16173	17188	17270	17301	16592	16846	15277	15293	14404	13892	13792	13141	12005	13360	14544	14754	14031	13873	14629	14457	14058	14347	13868	14812	14669	9986	13779	14103	15523	15648	15456	14981	14492	14679	16024	15305
1549	2436	1956	2817	2263	3480	5830	5464	4953	4316	4507	6226	5190	4981	5380	7423	6676	6240	6163	7619	5508	5190	6796	6782	7054	7157	9291	7939	6261	7202	7816	6426	7254	7684	8225	7045	6668	9748	8199	3305	7639	8224	5455	3463	4899	4560	7909	6872	7496	5902
37602	38561	40534	44530	43683	41404	41697	38915	36495	34044	34100	38623	37866	31990	38496	34733	32406	35617	36582	37894	36188	40615	36856	38815	34145	35908	33283	38089	40906	37184	37157	37438	38498	37671	29462	36423	36025	39512	36343	37261	31017	43641	41854	37171	37049	34346	33399	38784	44793	44739
1725	1613	1763	1577	2060	2264	3771	6308	5955	8444	5517	3817	3317	3585	4558	2902	3804	4242	2125	2401	2287	1670	1414	1373	1200	1124	873	100	78	87	224	868	902	903	1159	978	997	883	1069	948	961	1184	1206	1201	1055	934	995	1046	1136	1118
5113	4071	2485	1900	1787	1327	1641	1580	1240	1318	1980	1850	1651	1596	2203	1555	1468	1293	1241	1017	1222	1679	1671	1591	2287	2930	3176	3102	2240	4599	3259	3589	2637	2558	1939	1743	1655	1613	1497	1296	1156	1287	934	1346	901	1004	957	1038	1033	1029
2384	2657	1972	1224	1535	902	1623	2875	2700	2565	1504	1407	2563	2310	1610	1576	1508	1209	1129	576	695	636	588	584	437	656	773	789	1160	688	1515	1073	760	710	989	600	383	441	420	256	511	584	528	600	607	590	497	306	359	422
2744	1164	1338	1329	1617	1907	1387	1538	2404	2688	2540	2441	2754	1512	980	1112	1077	882	605	784	757	693	659	834	498	1798	1104	1337	2139	1300	1654	1236	853	564	740	529	420	570	398	442	639	310	279	377	332	490	530	320	594	821
1861	1858	1546	1938	2186	1979	1612	1461	1337	1155	1273	1527	1670	1746	2160	2372	1647	1583	2052	1894	2166	1415	1840	2271	2645	3086	2852	3688	3580	4418	3579	3116	2703	2367	2344	1683	1935	2261	2550	2581	2254	2178	2488	3331	2851	3233	3078	3719	3158	4083
1026	1039	1853	1046	1058	1002	1037	1558	1134	1055	984	1068	1118	1031	1506	1465	1440	1228	1417	1587	1077	920	1198	1046	1022	1151	1349	963	1283	1243	1573	910	1200	2105	1710	2425	2660	4375	4006	2548	4993	5830	5847	5741	5975	5427	5774	5413	2957	1569
1096	1215	1460	1370	3438	3736	5470	8934	10526	8874	9388	10803	9976	11466	8628	7904	6820	4649	3798	4622	4591	5102	3842	5143	4062	5072	6726	6037	5783	6230	5004	5519	6607	8280	7096	8113	8185	8654	9113	9557	9002	8688	9455	9346	10574	9706	9649	10106	10256	10227
3437	5036	4828	5254	5607	6240	4853	5806	5462	6752	6875	6423	6956	6566	5967	5408	5276	7157	7003	6495	6849	7383	6266	3806	4258	4202	5490	4735	4902	3833	4503	4908	5615	5628	6853	6912	7124	7448	7450	6913	6199	7130	5644	5901	6944	6047	6782	6884	6458	5709
7740	9024	5903	6925	6974	3642	4059	3532	4957	3383	3621	4198	4249	4421	2950	3674	4070	6947	11702	11512	10533	10784	7598	5225	5036	4529	4933	5071	2958	4448	3321	4156	5548	3727	6354	7329	7183	8104	8281	6323	7801	8875	2815	6117	9769	8692	9601	8043	7021	11676
3890	3519	3274	3411	4119	3709	3417	3154	2853	2891	1598	1262	741	742	677	588	542	596	529	583	588	622	559	814	1042	862	1029	1408	1012	1222	1121	886	1265	993	1014	1217	1435	1634	2130	1878	1213	1250	2309	2569	2019	1755	1722	1704	2324	2438
7066	8486	7369	8418	6345	5934	4537	5865	7431	7456	7004	8523	7792	9132	9401	8008	7081	7643	5868	5627	5731	6042	6858	6020	6331	5791	8673	7063	5421	5966	5833	5453	4562	4774	5394	4553	4995	3897	3904	3778	3430	4045	4087	4121	2975	3070	2584	3020	2992	2935
2442	3593	4430	3267	2686	2699	2006	2018	2325	1532	1810	1809	1837	1457	1629	1729	2052	2783	2585	1943	2179	2226	2740	2571	3181	2202	2363	1749	2122	2521	3685	4431	4203	5770	5278	5301	5094	4303	4419	2945	3115	3571	4819	5555	4545	3690	3143	4299	5687	6282
6754	8098	8166	8692	8782	8681	6969	7257	6747	7917	7007	5533	5226	4371	3701	3616	3696	3255	3287	2413	2797	3825	3112	3120	4430	5269	5374	4681	4971	4208	3476	3170	5036	4877	4416	3684	3113	2760	3013	1972	2961	3044	3234	3518	2855	3391	2492	3170	3752	4178
1059	3644	1457	2917	4401	5059	3208	3409	2530	3137	2631	2316	3667	3285	4709	4006	3706	124	84	2423	4891	4992	3081	257	945	3252	2457	2782	2439	2374	1682	2450	1621	2140	2645	2365	2552	3355	3612	3117	3709	5060	4829	4180	3788	3133	3517	4122	4574	5225
4766	4720	5539	5408	5517	5911	5512	4787	4748	5257	4762	4190	4322	4457	3529	4456	4152	4481	4823	4501	4913	5271	5350	5422	4273	4771	5298	5369	2835	1510	3814	4545	3372	3275	2662	2307	2458	1569	1606	1149	1318	1335	1451	1607	1756	2277	1792	1940	1554	1991
171	178	144	150	159	135	4175	4295	4141	2821	2954	3999	282	253	211	8088	11163	126	97	5080	2570	2210	1978	2140	2626	2149	2194	228	314	2423	2428	3168	1822	2694	1404	138	145	128	197	134	1887	2180	2469	2294	3972	2780	2156	1972	1949	1985
3698	3758	3655	4406	3758	3659	2890	3313	3367	3690	2984	1652	880	913	743	688	885	1239	1212	1726	1745	1678	2377	2719	2666	2531	2326	2173	1350	1117	1103	617	698	721	766	922	1061	1404	526	140	585	1623	1137	1238	1064	1425	1085	1111	1736	1442
2796	2157	754	1297	1453	1248	1254	1242	1562	1431	1299	1215	1222	1193	1351	1409	413	202	128	188	89	130	182	114	104	139	125	833	2775	6008	5908	7523	7284	7097	8765	9157	9369	10062	9270	8138	7213	9032	9877	11783	10188	9751	8071	8752	9497	9299
8625	9908	8338	7501	7706	6465	7078	3681	3798	4497	4564	3214	3771	4299	3524	3918	4235	4615	4018	3833	4789	4241	6821	4601	4877	5576	5455	3362	3502	3398	2643	2615	3005	2640	2539	2768	2681	3072	4228	2254	3317	3997	5949	7684	7482	7863	8513	7767	8150	8224
1916	3697	2463	3107	2302	2021	3344	2747	2759	2946	4427	6108	5231	3941	4847	1934	2268	3684	1430	1582	1663	1513	1120	1019	1118	1127	763	846	947	1791	1143	1454	1594	1733	1229	1465	1146	1017	1030	1051	955	1187	1078	1269	1027	1090	741	1132	987	1035
10034	10077	11085	11507	12056	10061	8720	6636	4195	3828	3904	4140	3155	3571	3180	2972	2989	3675	2706	2952	2489	2544	3629	4361	4453	6226	4340	5848	9896	11274	10673	10660	9912	11725	11613	10347	10992	10405	10233	10356	9949	9785	10461	10820	1630	5087	5099	11771	11758	13078
1348	1398	1472	1636	1488	1730	1629	1535	1340	1490	1132	1006	1406	1332	1336	1358	1101	989	1028	1097	1073	928	1253	1134	1277	981	1433	1210	1336	978	1392	1442	1909	1710	2341	2596	3653	3277	3471	4287	4459	3110	2953	3347	2600	2176	2271	2146	1868	2812
2360	1074	1520	671	816	873	1646	1202	1852	1981	2100	1761	1872	2083	1915	498	374	469	562	569	1108	700	416	573	647	449	980	462	976	778	423	499	491	1595	1670	2269	829	628	1037	630	828	1250	1240	1470	785	1050	571	716	760	1081
405	8112	15982	14873	641	2216	13627	15036	14841	5530	3275	9511	13698	6232	5731	7311	12398	12149	8095	6419	7407	8878	7238	7398	3248	2710	2585	2645	2867	626	1518	3458	3992	3329	3238	3460	4672	4966	4671	6096	9250	8530	8605	7041	8595	8712	5932	6781	6722	6363
353	420	420	252	157	169	158	142	114	139	117	103	141	144	119	142	133	102	120	148	106	108	99	98	112	69	80	92	64	86	51	74	61	56	61	55	85	90	54	71	88	77	83	74	75	82	76	103	77	111
3571	3528	2899	2894	2727	2657	2595	2522	2568	2362	2320	2301	2222	2299	2309	2254	2243	2259	2357	2269	2247	2334	2252	2303	2242	2311	2267	2275	2273	2294	2336	2419	2330	2409	2370	2313	2364	2352	2386	2454	2281	2311	2426	2471	2384	2389	2266	2348	2424	2450
9270	10893	10640	11245	10942	10432	9277	5934	6695	4580	3386	4038	4814	3232	2608	4442	2146	2943	823	846	1764	680	3031	6688	9375	9068	7613	5343	8848	9739	8668	7915	8486	8363	8781	8967	9523	9177	10128	9452	9303	10585	10497	11142	10897	10611	10710	10355	9940	10515
22717	22985	22191	17980	11270	10894	7107	9972	9529	7295	8412	11341	9160	8121	4518	4710	3899	3408	3821	4267	3308	3930	3252	3074	2960	3329	3831	3472	4010	3559	3890	4083	4575	4377	3383	3319	3863	4039	3628	3004	2901	3233	2409	3400	3755	4040	3349	3457	3137	3209
1667	83	336	1270	1382	1580	1239	1199	862	1549	1314	1285	1017	1029	1300	1062	900	699	872	945	1239	1389	1369	1146	1174	962	905	914	1097	1049	931	1113	1299	1486	1501	1359	1215	1124	1042	657	762	762	1580	1461	1392	1236	1110	1156	1172	1198
1833	1962	1777	1640	1299	1270	1550	1528	1251	1123	1086	1170	1172	1259	1501	1647	1635	1355	1172	1168	1054	1178	1459	1723	1943	1642	1608	1618	1375	1109	1114	1123	1029	1138	1253	1628	1340	1056	997	930	1088	603	1397	1272	1203	1069	1072	1129	1226	1130
10063	10733	12897	10827	8207	7765	4826	3825	3530	2635	2410	2399	1937	2048	2073	2046	1859	2132	1812	1729	1935	2172	2091	1806	1701	2032	1568	2006	2273	3318	4614	7479	8877	10379	10682	10172	10518	9210	9151	8234	8133	8301	9283	8457	7762	7940	7389	6222	6376	7699
1307	1344	1438	1454	1251	1066	1374	1624	1502	1272	1339	1249	1134	1341	1446	1723	1259	1103	1208	1336	1354	1351	1436	1399	1444	1528	1445	1317	1277	1409	1415	1488	1517	1360	1260	1446	1349	1286	1330	1248	1150	1198	1317	1203	1083	1020	1319	1385	1558	1379
20830	19227	13457	29733	15788	15767	10716	18686	15859	17678	11118	11500	18167	17850	11566	7539	7426	9563	6415	4042	4436	4427	3700	2814	2990	2902	2922	3463	3207	4275	3427	3966	3800	3873	3352	3312	3380	3499	3256	3407	3143	2917	3459	3315	3226	3617	3109	3496	3728	3823
1652	1557	1546	1723	1424	1386	1467	1277	1123	1224	1146	1162	1272	1103	1207	1199	1288	1130	880	1229	1369	1576	1760	1549	218	115	1197	1394	1402	1397	1390	1219	1119	1397	1321	1311	1279	1178	1137	1192	1107	1210	1258	1285	1256	1295	1215	1161	1288	1225
744	636	828	826	622	636	639	504	652	602	492	557	624	624	594	649	829	859	760	1027	1261	1430	1661	1540	1583	1572	993	1425	853	404	438	456	464	522	494	442	567	588	449	472	461	510	503	589	506	586	554	558	566	538
768	500	776	1433	726	427	454	563	438	360	292	263	341	329	261	247	194	212	183	176	157	186	214	253	272	291	390	350	298	421	478	821	961	779	975	856	776	694	564	773	738	451	583	318	195	216	198	179	192	228
1216	2492	3152	5440	3821	2786	1501	2886	2497	2273	2757	4284	5485	5930	5550	6177	6091	5461	4500	5489	5575	5855	4610	5027	3751	3089	4018	5147	5402	5548	4192	1384	4196	5468	3562	2685	3655	5446	5936	5125	5538	5808	6551	6164	6096	5113	6044	5883	6133	6119
534	783	773	842	599	504	450	352	274	334	340	824	770	949	944	655	878	671	520	348	284	378	415	370	443	423	371	425	289	207	266	316	288	255	300	376	336	355	406	732	936	428	658	802	824	662	502	460	638	550
3026	3324	20258	9004	3296	3420	4431	5720	5452	4250	5577	5666	4410	6139	9655	15824	14356	16430	18176	15385	15927	13474	14672	19218	16882	13851	14904	14464	16406	16926	15962	16430	10289	6053	4462	4942	4502	12712	18724	20919	13801	3854	5642	4267	7440	9658	3176	3830	2812	3563
3685	4273	3920	2924	3374	6530	8804	3151	3944	6380	4462	1448	1304	1629	1486	1602	1533	1434	1144	1199	1365	1222	1123	1386	1210	1336	1500	1484	1948	2314	1540	1340	1341	1278	1328	1233	1362	1263	1355	1421	1269	1201	1278	1190	1421	1296	1437	1651	1676	1894
257	211	296	230	266	192	177	219	157	146	161	152	163	195	144	119	144	128	132	121	121	166	154	136	145	125	199	146	151	150	129	147	164	131	153	157	156	121	143	179	166	52	103	227	226	215	214	213	194	185
2684	2925	3106	2801	3583	3337	2927	2523	3020	3815	2876	2165	1681	2104	1815	2139	2713	3479	5203	4465	3999	2732	3025	2359	1951	2462	2981	2527	2033	1924	1624	1353	1362	1245	1326	1386	1236	1270	1190	884	949	1122	867	941	862	654	666	648	671	748
208	475	508	355	347	313	392	371	329	314	383	331	325	312	342	309	298	327	323	313	396	432	474	406	427	385	414	326	299	348	345	350	397	399	437	431	487	451	472	417	404	443	415	426	413	387	414	387	425	467
10435	11868	8949	9842	10378	9987	6089	4864	5695	4457	4998	5026	7834	9191	7100	6084	7090	5792	6806	5783	4740	4845	4620	5319	4925	6337	5714	6881	8932	10345	10326	9346	11673	8717	8472	6535	5940	7639	4783	5042	5457	4314	7746	5274	7265	6418	5437	5491	6087	7057
20306	20240	19823	19540	19330	18699	18987	19355	20242	21171	20361	20981	20482	20537	19318	19217	16815	17674	17847	15120	16689	16814	15432	15509	16782	17677	15294	18899	18214	18073	18054	13948	14078	14188	14872	14599	14113	15721	18671	20650	20588	18968	21464	21746	22691	21914	22813	20748	22878	23053
2842	3022	2512	2226	6468	8269	8056	6135	6996	6880	8284	6246	9556	9119	9301	9360	9021	8778	6921	7111	6958	5922	5070	3435	2860	3461	2913	2552	2196	5107	8027	7775	8386	8850	8843	9875	9630	9500	9433	9969	9319	6229	5519	5989	5235	6647	7139	6332	6276	5521
5685	6067	5767	5375	5776	5886	5538	5309	4523	4452	3239	3731	3949	4040	3623	3653	3453	3376	3432	4068	4442	3501	3917	3359	3436	3739	3839	4041	4960	5617	5599	5583	4057	4455	5949	5441	5518	6073	5645	5770	5236	5612	5834	5926	4912	4982	4540	5433	4574	3978
1589	1708	1334	1775	1830	1482	1316	1308	1598	1465	1882	1802	1865	1854	1633	1876	1064	1804	1744	1741	1616	1722	1632	1376	1270	1509	1967	1612	1771	1862	1901	1916	1926	1766	1732	1627	1523	1722	1682	1652	1675	1586	1960	1722	1427	1332	1643	1595	1334	1197
28142	29919	22776	27750	31859	21868	13588	9392	9536	6964	6466	6221	5964	5704	5995	5785	5916	6370	5930	6378	7744	7103	6803	6887	6937	8486	11174	12790	20351	15945	27955	30131	27914	29379	28981	28434	27847	24975	28865	30186	29772	1791	32255	33035	32453	30904	28050	34214	32727	33465
58001	58495	55409	52776	60818	50847	46429	42719	45921	46072	35206	32930	36028	37148	42112	34325	43960	44851	38577	41435	42141	39895	49802	43354	39370	37813	56244	55531	52003	47949	50070	45967	38492	36355	43506	36951	35973	39569	33383	24682	22775	25760	28489	31419	26602	24958	20896	18701	20344	41129
4105	6506	5585	3677	4831	2940	2411	3102	2784	2606	2619	3034	3926	4553	7188	7843	7024	4785	4404	3432	3421	3941	4542	5080	6837	5451	4172	3819	4178	3604	5401	4618	6094	5262	5498	3870	4891	5021	5143	6049	6122	4207	6028	3418	2999	2295	2188	2195	2295	2169
3668	3151	3249	3041	2903	2998	2999	2546	3023	2960	2671	2944	2873	2932	3205	2579	3099	2444	2033	2271	2288	2149	1970	1954	1882	1696	1493	1536	1594	4273	1960	1585	1557	1717	9334	18673	1877	2073	3377	1654	3238	12342	5566	7386	4669	3013	2507	6065	2225	2428
15733	20548	18922	20131	20058	19301	20977	20806	21021	19473	17381	20233	18289	12837	11367	9051	6621	5597	8760	13286	6655	9209	4489	7333	16680	11880	10315	17196	14443	9055	10154	17536	15531	7290	13852	19342	17431	17744	20532	18878	14637	15463	14364	14420	15731	6129	3326	4394	4919	3009
3949	1387	1565	2274	2866	3081	5561	2119	4345	5194	4970	6387	6173	6606	7181	6721	7465	7162	5508	4947	3753	2358	1609	3477	2957	2082	3083	2224	2136	2083	3061	3102	3100	3066	3812	3104	5095	6455	6287	5457	5398	5701	5079	2981	4449	2871	3700	4032	4356	5846
2544	1866	2172	2596	5476	4290	4270	3829	4093	2811	3354	1885	1141	927	1811	1355	1972	3394	3581	2848	2767	3993	3903	3701	3225	3391	3560	2635	2753	1694	1628	1335	1238	1640	1041	1077	993	1063	995	831	764	1044	1188	1036	1086	1198	994	1219	2270	2547
[truncated: 1,950 more columns]
