# Supplementary material for: Intracellular growth of Mycobacterium tuberculosis after macrophage cell death leads to serial killing of host cells
Source: eLife journal article supplement (doi:10.7554/elife.22028), 2017-01-28
Supplement: supp [file elife-22028-supp-v1.zip › elife_poa_e22028_Figure_7_source_data_2.xlsx]

## Sheet: Sheet1
179681	165194	168866	178073	161306	168015	167815	168734	176849	181952	178786	171472	175448	176386	177285	170517	171611	167256	184193	174393	166653	149986	147526	154325	161934	161920	155961	153659	159680	165252	169044	166956	155839	135623	149165	175278	189909	186471	199243	200946	191069	198040	210483	208175	204161	213992	195283	181448	178118	177213
116208	117392	113856	111063	110130	113000	112624	115493	117260	114763	116966	116919	116518	113017	109146	117632	114938	117426	115963	118916	124633	117542	119948	121410	122457	123096	127569	123965	122479	112162	112922	110249	120304	120827	125222	120891	123996	127872	123097	121474	131988	130932	124429	135035	134592	131829	137147	137905	135811	143427
1346844	1383307	1354262	1363148	1342767	1389251	1433671	1445341	1427451	1466717	1461485	1460901	1463828	1447717	1429894	1445213	1383628	1397188	1379387	1376738	1451925	1383709	1383782	1339748	1241202	1343196	1418263	1448468	1470482	1483608	1422933	1377307	1359409	1455414	1459089	1419987	1356055	1436060	1395825	1446831	1401741	1525436	1530025	1497513	1454848	1494047	1504713	1484868	1496771	1538670
854181	862854	880583	859322	879459	876406	954383	1026014	1026350	1024257	1017972	983542	957582	930721	950762	983953	910790	974774	1073936	1100197	1181614	1146553	1121610	1119765	1105514	1151838	1185107	1141013	966169	948653	938413	906865	947732	947501	945721	973944	972800	934906	947525	951143	960256	960565	941272	941825	901156	923848	923190	927764	973890	996854
1656125	1759653	1783717	1818028	1803800	1750609	1633884	1636654	1612736	1597572	1653654	1853661	1977850	1885847	1815209	2021180	1646771	1674656	1690168	1628919	1583486	1548888	1509209	1584211	1528092	1562083	1558196	1581034	1577524	1619510	1669098	1617122	1618832	1610922	1643631	1630293	1623263	1621149	1603712	1604563	1592267	1590346	1569319	1756121	1801116	1830214	1981780	1802405	1846140	1827551
705957	649112	641080	602896	605777	598228	605239	647059	586758	602916	640298	641256	638339	637116	645133	626856	541965	485748	641140	575392	565311	500516	526498	503199	547101	575112	545061	572595	520426	647424	670993	525671	566310	580706	583868	571806	446781	461712	475498	530628	584899	517724	654724	661508	634580	659025	644449	657940	644290	658949
182750	184246	186966	186467	182492	211717	191668	185568	182761	192888	207567	185325	194722	185260	194538	196607	188379	189949	189661	193948	194100	183364	198935	192455	198116	204816	199397	204761	203677	193913	206019	207391	211488	220236	213836	210815	197314	219490	213462	215686	207491	199586	210200	239923	221900	239175	265582	249567	258541	262655
798905	781854	570655	773546	910085	900261	904709	880867	921476	1487744	1516949	2120946	2028792	1690772	1451099	1542991	1139957	1261498	1275044	1269197	1520791	1700348	1529461	1649438	2042265	1964718	2116938	2122164	2033051	2224498	2421757	2474862	2428415	2166320	2013225	1780449	1842073	1647303	1626812	1715895	1779493	1875496	1778762	1946300	1796725	1180447	1187747	1153221	1132235	1121086
890738	897890	901830	908924	927261	919967	900746	870521	875303	909826	893029	830633	885829	838887	839017	853198	920571	988542	1013412	1021183	1041496	1067385	1109564	1105755	1088996	1133815	1180142	1092601	1039813	1021720	962895	1037389	1046273	972863	1003246	982339	939953	959857	951779	938126	918392	949755	913869	866376	891196	910084	903217	953414	944851	967456
108065	100312	88674	98854	100459	127506	102376	89824	84809	98680	79428	78589	82355	115098	120105	123187	130425	115743	120727	146231	193103	191155	219575	362967	279559	253765	172661	167787	188031	208008	205018	259516	202259	218749	274170	328827	408686	450112	379646	373632	375196	378347	303154	320259	290542	225834	224058	216055	223563	232771
91885	95206	90853	112271	94840	106304	106215	123661	93074	89272	106166	104389	109354	84496	98481	85157	85941	81607	77966	78327	84500	107723	109546	125774	124779	126630	85762	82891	124770	79859	81606	80841	79334	86367	88903	92401	96027	94173	90551	94579	87259	87415	87126	89156	86880	93263	101193	117727	128154	125581
763598	831702	807507	801430	795877	822529	838096	861474	862159	856126	847062	854550	944731	883957	872211	867510	868034	879661	868812	864342	874059	974873	955961	994459	942115	983789	893369	921352	871860	886034	868864	919824	854013	825236	872343	881559	952875	914450	936056	1025215	886603	862979	983526	833456	860436	831165	823780	805379	798770	836646
400998	383333	455000	391547	413721	422421	424742	403186	393979	397315	398903	411008	412773	407702	397837	386040	409962	403145	421485	418690	431739	411131	413649	399982	417489	418629	444816	437376	463459	461676	458365	472697	486337	462843	465075	433075	442807	452014	462320	453724	482488	485773	498944	489881	452305	438076	427495	449041	464481	478131
1115783	1119728	1152497	1175487	1139023	1149811	1113137	1138921	1132834	1153360	1152484	1119721	1150788	1110664	1168224	1161599	1179129	1180983	1221336	1213180	1237700	1186713	1224635	1214618	1225829	1213929	1175529	1217846	1213812	1215719	1216588	1179685	1183775	1227942	1216290	1245544	1249648	1275787	1273998	1251445	1219240	1267884	1248794	1264405	1283857	1253265	1257029	1252020	1261622	1302125
413861	436713	451800	439468	434784	418218	432439	440372	433003	435083	456809	441429	478188	583117	573199	609599	575726	503190	494987	495590	520993	475133	453798	458827	466052	462227	484207	472542	511318	516973	560649	432323	498051	557319	507110	484254	489805	507793	559518	563810	535019	576481	610456	615367	646500	679156	639350	626597	636211	666256
466410	471124	464357	465432	483024	470052	490355	466773	460284	476642	477925	492121	507081	499821	529424	482897	517791	496081	524611	514736	522230	522277	550454	573675	526020	549912	579527	583477	571868	582633	578685	604886	594041	558637	588495	570986	547208	550269	560345	555462	554331	538543	523443	487914	532883	549089	541377	541681	535915	432053
309647	274417	282981	304078	297447	321428	301208	315682	291558	303388	308126	310293	297229	285064	306544	308982	295998	313231	306118	285065	312153	279164	418265	379354	271849	237323	347724	250422	298048	277339	247264	283165	270006	279708	252456	272139	264830	256462	284369	227136	196071	231810	237030	234959	239617	257186	233590	254955	238176	236619
109080	113201	107703	113719	102345	105715	109455	96987	101855	111854	109166	116306	117399	110034	110133	111929	92377	88019	86785	93934	97313	109041	95917	87320	90553	84214	93115	99043	99503	94899	97855	93748	93708	83779	81624	85053	84745	77564	86028	87698	72463	82461	72795	64624	77739	84418	63160	60227	70987	61507
303650	285106	290363	294447	293209	285228	275293	281191	286426	284364	298283	280791	288117	289421	284356	289213	282013	287183	296949	315955	286833	281125	286352	301501	300745	287808	300035	292483	293798	282384	290591	288333	287326	288230	291701	285287	294290	300019	296184	301571	316318	312749	312930	311662	310761	301038	288234	284981	283312	280934
284289	298492	297583	296531	287772	289378	302321	300165	302166	282971	278233	285566	312226	286703	303329	314720	303686	313381	313445	309112	322416	313939	322606	335345	326784	342812	345055	346340	378187	358908	365920	360381	356375	357358	366094	357006	360589	365447	361084	360082	353404	349152	353912	361204	340635	351629	357941	344277	357222	342024
318163	313492	338282	320604	312739	304357	293188	321164	323953	294634	303925	317425	330208	333218	333000	326149	331411	343393	345532	340534	340218	336332	323584	323264	328825	333550	333816	327162	333760	325117	350328	340849	347761	339995	347533	348869	344946	329212	398093	335477	352910	341954	341976	360089	357653	355399	337994	339662	358752	350169
371629	277314	304161	254746	496178	288730	353934	345505	470408	406196	382718	407003	354279	315342	334765	293394	308895	288913	284603	293818	312028	309891	284752	256132	250441	239119	230435	254029	248569	246998	270016	410652	301263	272975	271944	308510	324209	295497	303713	283326	322650	311425	298976	299315	284027	297769	294126	317154	291193	307775
1173494	1159623	1189369	1127758	1137547	1155913	1175569	1171095	1186501	1151144	1175560	1236952	1235477	1170032	1188577	1182001	1168412	1123650	1125586	1091905	1112697	1118066	1023176	1126792	1104437	1187142	1165376	1224677	1201633	1164570	1198213	1083451	981471	774958	737292	886768	868653	803824	11077	451566	461939	798014	1214104	1170586	1269787	1241268	1357747	1223707	1279116	1227841
823539	787315	801996	803575	801869	841391	830822	817045	763807	752818	793548	830978	800123	831729	870197	849645	846009	845871	836778	823946	903595	855456	820150	867878	894100	876204	886123	889378	858183	849226	851946	891540	944038	913161	938307	977064	974195	941700	933757	924467	949111	1001001	973226	951778	980689	966431	1024103	1079374	1054602	1053539
1158532	1128591	659489	899974	932742	995281	976421	937738	985734	996108	1019635	996259	1002433	1017220	994114	985052	1013507	1001899	1022020	1039331	940281	947036	933163	859855	949922	890811	906058	942751	932775	936958	977554	988586	976396	940394	925918	872730	906570	1006035	922270	925517	945694	964698	911925	917866	895908	891221	895459	905123	904448	916432
3571908	3620456	3568158	3661225	3483058	3622519	3569099	3602598	3554708	3644668	3744523	3638791	3696436	3673311	3707701	3715738	3537723	3644939	3583677	3659684	3819550	3622522	3833070	3840676	3814453	3910991	4139190	4079368	3955025	3374495	2194773	2344484	1626038	3754236	3891544	3957889	4128603	4212369	4367188	4337376	4459546	4477250	4456758	4398118	4215457	4158674	4068550	4057384	4021033	4002219
176860	201537	210823	198143	233842	258341	224860	214234	227450	226076	291564	270495	236887	252537	236194	239760	230615	236807	223687	224264	220715	247995	208147	176719	205779	258652	274767	281375	303944	302018	311717	309903	265828	278881	335065	402827	336005	323710	350959	309535	313349	333731	333548	209296	305677	215836	261082	323329	306363	297967
376883	402992	441735	478240	483247	504674	580273	575979	618119	420213	448306	416144	559294	627425	661453	654487	700139	589924	610384	511135	420568	362477	367277	349633	408280	369019	385039	373838	353732	368519	352263	382934	414341	422120	452208	458473	384987	365862	364759	342727	347729	344818	360515	365660	411528	402480	432690	431747	427646	429821
621377	641821	657012	623527	663210	674809	632118	669286	657757	652146	646630	668781	643071	673390	661097	680936	663308	716360	736445	752773	737038	778732	823439	756273	767419	749653	776940	814524	767347	817930	816181	791576	875665	851422	812964	826692	831473	821559	757881	797573	810015	787128	763453	790272	805284	803943	824356	788359	794198	803823
440789	435844	441453	430583	432144	431289	420218	419321	407036	412886	409272	406325	435927	424110	433842	440300	443189	428775	437328	416881	402610	393895	396883	399953	411939	410529	413847	401857	392858	392015	372108	377536	387667	393792	386590	382583	361994	325080	325637	340568	366722	403911	401292	394861	369395	376020	380274	377444	381192	416353
224607	246091	286730	349784	411419	421823	350292	323788	262138	446718	479058	313584	355049	526373	426661	345998	432629	485577	684017	483520	312618	440258	319648	314137	345405	376641	397271	369280	387801	403546	432155	511785	442328	451989	478075	547132	491128	469562	457817	501208	499278	462386	513162	461903	447983	468369	484390	407217	456660	458000
109632	118126	125834	131632	115970	105266	126534	130547	152127	161391	136751	143159	144320	154615	150437	147938	152140	149023	137058	137357	126194	138926	121663	125184	137390	141718	137408	141459	147390	129155	136431	147498	131689	127706	100362	92697	89786	90591	117338	119461	109776	120937	122565	120170	125150	122426	118105	124133	123488	122897
461480	500787	434142	467636	470465	512547	450095	462081	461298	576302	631663	586795	484566	401150	497399	508387	435893	532419	545294	544094	507045	513470	492851	514995	410305	498421	561026	456985	397074	379348	377339	412692	468935	410071	382184	339099	311346	336529	495994	452262	444033	414103	395254	331307	297723	221730	237274	246739	253508	261942
289587	262726	301706	313789	310893	318738	334053	317195	338278	303529	285156	315320	284295	213878	156606	222557	347976	368376	320825	318864	360856	393389	435093	558414	502642	507410	482567	414229	458432	503761	347769	333379	324605	304718	227066	160978	125819	143452	134479	210041	201066	165417	202728	173260	248321	256438	278442	267649	268473	337702
363603	303306	318297	306826	295400	289295	286289	312216	312541	313439	294805	298809	290999	303990	295481	272815	276108	292519	280840	277496	302626	303865	303650	296347	317743	303761	301420	304287	293640	287355	340154	353162	340420	332333	324164	320289	312820	316825	316494	322541	340066	343984	329101	324751	292921	359907	336439	310703	335986	332641
197810	191567	191164	207381	196616	209042	233669	237243	241363	255346	266248	260030	263408	259811	259985	261839	222382	225082	217849	231804	206186	212520	216407	199754	185710	149436	163989	146081	193968	202376	192322	210744	239722	256246	302806	269128	268378	267105	216093	225740	257253	214994	172207	155710	161916	237814	277831	290062	307271	308856
184970	178072	142809	148715	154324	164221	173640	160222	161342	176483	199149	178713	172886	146138	158400	156080	173842	176567	161900	177230	170111	168996	164911	165973	149527	197677	243270	249833	229060	198973	158800	151041	118808	118359	100030	110060	117699	118532	103590	108483	102506	80397	60235	78036	65993	67710	55079	63986	58965	71035
605063	592164	614696	676177	786303	817958	786700	820654	779816	787262	591668	391771	330652	364541	573075	565428	524051	566311	608933	664566	707974	690972	706530	758871	782609	821753	872097	889943	872408	914791	998246	1024309	969867	1019697	962689	969135	927191	912615	894421	953023	856472	873144	851383	901775	847378	798429	725409	674561	630608	644738
350700	360782	356159	274146	189160	187819	174149	161892	168218	169775	189979	215342	181354	171402	202492	301502	315297	314516	345322	396406	366446	353823	351576	338288	366027	378349	418524	449734	473328	437295	464794	422565	431564	446740	480678	445958	462222	457493	466736	500957	524549	535495	547828	552483	485408	504786	516858	511634	486016	530935
394765	374238	361091	361600	368206	392798	421445	380942	327612	315612	290267	290688	260714	289168	303474	337062	388759	412721	422832	446086	474782	537581	547115	568370	582564	612503	570795	542405	546569	580661	536780	605624	625973	652877	623380	583529	597471	597660	583304	638855	656678	632946	693852	670108	645034	713256	668118	633616	652686	679800
338451	372260	323029	390948	372501	330361	284063	288346	280562	270632	244204	210608	186699	143303	134043	101244	100468	95550	159415	156981	81045	69869	55377	53394	51857	49974	53336	71192	52733	73525	88732	71354	107909	108645	105092	128087	117904	122064	124049	130554	127472	123760	114560	111845	134878	93801	114462	66591	104236	102219
918750	899642	923323	898069	817687	316276	361916	436009	575003	685811	783530	750621	725812	788061	878695	930165	922045	842900	873092	485942	484941	514130	529094	615804	664049	760170	841610	910467	941785	931753	1024968	1040341	996852	794433	824029	913374	988636	1029520	1037396	1071078	1055341	972745	862121	883498	823659	857409	876190	859844	885203	824134
1390747	1427074	1418787	1364540	1386373	1358978	1348100	1240898	1128403	1099472	1120016	1099257	1112823	1174329	1152834	1149310	1121452	1172287	1156071	1131337	1172991	1167284	1179546	1198829	1234201	1214984	1312327	1269534	1254617	1264941	1219762	1251274	1307506	1412328	1353794	1332830	1361900	1386725	1393945	1454522	1491348	1555164	1536828	1522466	1518477	1498236	1527553	1451889	1483308	1408516
230446	228173	224213	217506	241400	259254	281797	297544	270768	278300	285909	296488	297887	303142	300468	310290	314363	307460	318900	305475	309204	302340	293058	273918	277915	258718	270525	255254	276044	272506	293141	308121	307315	312814	301844	290451	281137	277407	287483	276396	294061	264112	267278	268315	259351	266571	260523	250511	259218	278011
773803	798142	829023	820902	766643	781706	807880	814197	819041	821846	832305	815241	817517	787886	764662	796312	797738	779967	785226	785384	818249	817488	794733	813090	817364	812535	822429	817012	821260	830204	823305	797136	815166	830244	823731	800454	818303	819345	833778	817671	792984	810451	814276	772696	812324	811772	835103	839794	845125	884467
193899	221266	396437	528828	547333	511568	510023	505733	487185	535170	307105	501396	545987	547851	518009	531356	524071	522604	455548	333673	30695	147408	335222	377360	416146	583669	542687	644777	630877	598787	583202	606613	583316	620204	609912	616693	627974	654788	657995	656955	644177	634174	680042	679639	677174	603910	617323	627163	629401	584776
496500	497051	504202	510259	520493	524019	526186	520305	529287	535432	546310	526878	528079	539282	540251	534797	541254	549626	540399	543941	550169	548164	560283	555190	563351	564704	578265	556677	566611	556990	553028	560918	570490	571457	554593	535571	559208	562793	582477	568100	593141	599396	624684	619331	619726	600495	626387	621692	618388	641653
265363	258090	263439	267292	265773	284597	314199	319775	354842	305292	347430	325665	277450	286170	299476	300906	318058	308774	328108	328719	340524	332898	338121	362146	376561	371291	376491	397551	385358	381871	387182	385619	389875	405978	403061	404121	397329	391218	403695	380986	372384	373219	365760	360873	360504	359749	377737	396501	381727	381454
492331	511093	472467	439118	439833	452545	517829	564117	518846	473484	453141	480190	461572	489205	479573	439564	455972	433786	447781	393318	378078	437114	413791	437915	435392	425070	455914	476226	505776	495260	486267	488194	506235	499637	469839	485959	501976	502656	474965	494556	520556	533418	544013	545480	556754	556399	605162	565364	553771	554572
520900	512368	525051	533777	538716	551085	544086	547623	552670	550810	546452	558718	579494	586882	584594	549928	540945	548402	566173	563867	567919	575092	580542	576106	576543	590017	591275	587111	595430	588116	558443	546377	531449	551207	596766	600984	601475	611211	623200	640455	644586	653400	650146	657104	679872	677462	686963	694767	717299	722829
706703	604146	539991	640697	828164	824941	690673	711299	867707	863708	754688	759926	747621	693873	729251	899366	965424	932150	901425	916976	1079769	1073799	1028448	1000260	941856	855408	849793	861685	875317	897246	951826	1003141	868560	769756	768319	800012	761830	723480	948882	835312	863405	984015	853604	841673	897770	948389	855403	892157	935455	828747
207715	211506	170656	168510	221468	210104	205339	212223	197952	237441	216430	202325	217321	216094	193414	233958	223545	260373	256565	242869	238277	239225	231572	222005	226136	242928	266298	243091	198272	184277	205495	175428	169286	178632	199747	234166	235298	208475	217155	234723	231945	234627	252106	264601	227175	248994	231613	217476	239123	241342
459718	505057	305336	295956	317094	401766	403853	370524	337264	350554	322960	265762	310045	304556	314424	330462	320808	339659	357210	350872	350992	335615	325650	336316	332992	332376	324018	321742	332852	320264	334294	340340	332722	334569	335060	344639	334118	339527	331261	334747	353850	342176	331394	351464	347423	333996	349858	366359	342282	356400
729173	708899	690288	705115	724808	761300	724435	741089	693579	714696	703075	735540	754854	703554	749514	751546	735579	760787	770989	770948	826264	810713	846229	893489	886326	895577	886329	906872	904921	923203	953822	983473	969226	915280	905446	966292	949874	968442	958374	975460	983321	999719	1011583	1050087	1074191	1057307	1013687	989079	997638	993212
224376	216643	185590	166136	191185	177018	172482	183781	179786	198553	224416	239288	241774	225159	231177	223498	236869	262286	230152	259654	260115	272850	271576	257669	269172	257301	269784	271082	280013	283341	296418	299333	278133	286386	284247	312003	274097	281059	286693	302139	311291	318667	321486	290652	300870	324121	317960	321466	318686	322729
1177843	1209948	1242213	1176816	1086783	705890	629505	596449	550420	556148	575495	595433	628907	622884	741418	752146	663287	660584	704732	722164	661848	664202	692225	694478	718046	745263	782800	750388	713135	692452	685033	680020	655262	656521	680151	697631	788322	726845	759943	758958	897406	781621	731870	764058	756016	682343	716283	706790	719670	729246
1136589	1121188	1104900	1052496	1094503	1054160	709145	699894	670012	686413	683704	647300	611568	629398	634346	638746	619084	617341	654032	674057	665044	753067	643393	754539	611953	597385	569164	648945	705934	666887	681570	681421	644449	668248	656289	660534	709924	718215	720886	683834	668406	662689	697640	708573	724044	715654	753629	645537	674717	682455
254891	242727	236849	240425	243317	238577	225522	231418	224633	225352	248646	239960	228840	248101	254159	249508	247966	277885	237072	249508	249632	240880	247783	241926	259780	279120	259483	239435	243510	227957	215401	210378	208153	239358	255362	248428	227025	252081	217282	241740	258264	241716	255641	297672	247743	296257	277174	304246	307497	322327
323759	317735	350796	327663	420286	411584	428165	417632	391335	406373	396939	386821	346222	319321	279027	349066	312335	306861	295918	322886	335090	323035	316626	331339	307079	303519	341392	323600	347022	332125	324295	357896	323914	288265	317686	313492	307322	310962	293793	273359	306391	300087	294253	296292	319510	305045	289163	319147	320334	332062
188344	150261	143360	142210	167683	151440	143111	149754	164621	171955	190775	184351	194107	219011	283567	259916	286567	225219	222955	440533	482704	509734	449821	456720	329470	485231	524846	527582	507818	529174	510586	520657	549442	482964	420518	375086	341703	251477	255543	255329	238591	234134	236737	240579	227870	219890	233073	229355	233850	237321
487124	455376	511675	516390	480334	476693	514583	509531	532437	497842	430007	508654	521295	500704	515048	491569	520215	545188	554584	549970	538843	562592	547688	545212	536191	516602	521396	529295	533047	519166	517553	537122	528116	509786	526279	520200	515340	514791	547539	571542	583677	583000	578248	587193	588739	580745	596298	601227	592761	594535
404178	367480	342997	347346	361786	348599	359267	361143	343442	351229	289762	329828	364105	368938	346558	355430	367678	367757	375292	398105	394507	365982	379770	437279	400028	504031	422295	378129	344966	388019	414912	605801	467581	516491	489397	485993	458555	414011	513503	505142	635699	643744	1058024	943502	1177773	1235563	1136451	959583	916362	837052
342982	372233	321611	325461	345245	382515	412785	421701	404970	411141	385077	393985	412134	444944	406283	370751	450952	420272	409333	413879	406229	396196	439574	414742	409734	392897	403829	387123	420238	428872	409621	372661	402521	405777	420082	442367	445293	447556	453239	446870	481416	512766	471167	523089	491122	508310	502222	479434	478050	469615
190831	201977	206906	195683	205361	199973	189505	186305	200398	207628	216175	209067	210020	218625	224322	204906	221474	225934	232078	231377	233599	229315	227362	231634	224833	219755	218980	214854	216666	221141	236491	230529	251172	243391	239019	271998	267356	251249	264180	275948	276421	287437	283142	309089	307615	320693	306306	304985	298010	315183
1682545	1657199	1614419	1429275	1653404	1731384	1796947	1679010	1651684	1977441	2143526	2178675	2235962	2026289	1670504	1778689	1895561	1849547	1805449	1861350	1730868	1778917	1715929	1785477	1690815	1353100	1548881	1606046	1871726	1886735	1814686	1976945	2028038	2070254	2026560	2025238	2111652	2035337	2059775	2075568	2054124	2029142	2016205	2029179	2049013	2056342	2136573	2118679	2119877	2140050
1010954	1010130	1045713	997241	1009426	1027595	1069501	1060332	893599	1033144	1064906	1014445	1003727	1061193	1116445	1177570	1165080	1191082	1251335	1231088	1136306	1128056	1118774	1179779	1145531	1116043	1134724	1177030	1149569	1052646	1075137	1100293	1100351	1212201	1184051	1161808	1173911	1179636	1180776	1236119	1229599	1256589	1238004	1225063	1243708	1222549	1251900	1242573	1266049	1257222
455562	427577	345741	401144	380783	406771	409492	435073	404639	351866	333387	352269	347753	370776	363006	377750	393803	380834	349766	334645	347831	321622	276815	120331	193862	240227	328395	443498	493182	499100	520143	478504	510964	570731	586171	642409	681562	726312	746643	685211	677680	704007	755230	743988	745498	706622	693070	760222	927047	924281
464553	459137	474021	469532	410779	409749	377476	315615	339520	374115	307783	393327	409497	452564	543028	683965	739882	811172	847212	812207	797445	793601	768358	785507	822898	745697	779599	788239	858384	824753	769472	760410	706242	867239	858312	819772	827564	760504	814224	774646	825924	889600	945026	926594	937067	911725	906026	915062	937194	940452
160183	170556	177485	169145	164375	170660	187285	188400	168690	179801	204784	181438	185965	192806	194469	199009	212849	214673	214386	210011	205878	205772	208229	214855	207556	214864	208012	205211	201799	205629	209440	201913	215352	216591	214521	214852	215042	207383	215928	214601	219692	217035	220652	231137	241246	228435	229391	224025	234860	234330
339451	378663	406030	404602	425230	425596	606683	561147	547531	554087	550478	553373	513729	573031	633069	648330	676136	707655	661517	649820	625862	644886	655519	656838	641193	625962	631225	651732	672327	664799	684563	697787	676092	683519	681953	700058	704528	684289	719926	679864	658335	660029	684476	705954	732162	742715	726944	750512	776805	791005
337370	315850	377588	368352	371189	375398	363459	370397	401795	413084	409477	399172	416810	404525	410420	423103	421472	405573	420373	426379	419047	417481	411779	430189	430356	422858	423315	425489	413870	429922	420611	453669	434280	462933	459295	488233	499179	482880	463760	461432	477554	459173	465219	493041	501563	513055	527364	519109	493511	500579
683515	686286	722021	735421	702447	701221	831285	773052	827836	817302	798700	744844	760212	748150	802230	764847	884068	845898	870007	1029907	1113871	1085036	1078278	1177349	1207590	1179501	1104430	1073635	1116395	1108031	1049558	1056756	981612	908976	944463	912617	954116	960160	967945	905987	935569	936844	971039	931215	899796	829882	810331	742696	817362	811866
346912	341846	354670	383582	351180	354299	365338	381038	361886	400571	385457	392825	393112	388245	417166	437220	436645	402211	405302	374611	346361	386179	327950	315094	322082	290915	339679	364229	372502	372363	371926	363963	350023	334980	372293	356589	360439	354349	335647	337455	347831	378573	405266	362809	371123	370103	373255	365513	395450	378796
1006942	1026669	1032593	1039284	1024667	1011013	1061165	1079309	1051743	1082513	1045634	1085470	1075946	1093915	1111494	1067571	1101392	1127163	1154623	1155730	1174405	1192264	1222451	1257599	1295828	1283109	1232838	1202401	1250823	1251597	1194123	1274963	1266540	1236120	1238060	1190941	1206976	1202371	1216092	1138280	1133871	1168776	1194326	1095866	1141481	1137084	1129584	1149008	1102410	1089871
79624	93524	103485	114518	134558	136399	122734	128562	138350	143314	152890	147225	138748	153765	140737	141195	133847	132789	128684	146595	148020	200051	202015	207571	201348	206972	205736	196979	189239	160791	187345	179904	180582	198909	186632	176564	167144	170898	173197	174007	178239	186212	169483	174253	173395	171565	164833	160329	155914	150792
837685	851240	842548	864343	837268	845719	859431	866721	861348	858079	845365	785330	837140	835558	819055	860788	857010	884670	870556	922599	1014942	1045135	1055775	1073800	1094193	1045961	1047337	1061498	1075778	1069361	1092734	1092685	1092740	1128520	1114920	1063157	1029933	988424	984980	929262	895392	874353	894768	889136	975222	974064	983746	1034953	1062586	1113955
687599	684092	698681	693039	678443	664707	687289	690498	712004	723654	739185	724296	727590	717611	728877	734384	718104	722610	712577	723489	746245	741192	747932	775929	782542	804333	783307	791802	792918	820167	828804	808136	834127	885379	907526	895980	909004	921262	916371	928210	932225	946910	952823	942379	924795	954441	943101	973993	952246	952684
1676610	1637415	1669867	1663954	1723969	1736736	1775164	1718671	1685994	1777875	1823223	1799077	1745605	1838318	1844440	2044407	2099141	2307143	2223819	2388808	2264811	2546976	2608402	2603260	2607462	2685123	2428631	2437601	2347615	2480915	2375287	1985370	2118157	1543491	1587429	1626556	1750839	1801720	1921697	1833163	1976680	1852655	1931905	1867526	1944816	1991424	1789982	1673645	1697338	1794217
1136374	1171316	1138151	1147344	1160166	1180054	1195353	1192623	1232875	1259292	1314727	1307460	1254299	1304921	1302470	1290155	1303449	1279582	1255652	1288524	1296081	1314399	1310912	1306560	1280822	1279020	1307968	1346090	1368383	1354448	1384212	1356060	1373660	1366378	1379347	1382582	1441022	1451205	1436381	1411672	1421594	1437128	1460848	1475397	1501500	1485792	1456657	1459436	1458728	1514935
427914	415670	403291	415268	426185	426979	449997	419201	456626	413357	419654	430900	423487	443509	455813	456105	454118	449690	460244	462616	457756	467871	453947	505509	483798	493655	509280	472474	469750	484891	487954	481737	487183	475376	477483	464506	478880	515168	508400	516046	516254	520044	540783	529328	507923	510181	480222	524545	515649	542819
1101791	1082299	1034211	1060559	1096297	1096514	1117140	1126845	1146661	1058774	1067090	1072544	1043367	1099061	1104558	1140444	1087348	1079508	1026570	1113391	1107286	1125377	1091846	1124488	1036498	949132	856819	1040090	1064100	1075531	1114862	1074548	1047362	1081267	1129337	1103148	1122626	1142159	1161276	1187273	1177135	1162897	1166095	1184582	1129631	1104206	1108864	1075113	1097923	1021380
344555	372371	364708	363880	370139	373343	360520	346839	370637	388581	399413	405177	396180	408029	402247	404948	431839	415489	414779	418109	425130	422182	428249	436488	432769	435890	438678	438031	430792	434938	435865	436995	436480	442512	451966	443082	452769	452290	449320	447829	449574	460598	450415	456288	454758	457885	458858	458090	449782	459945
114317	108062	109746	109680	120155	107332	111426	116541	105981	100752	99924	100857	98059	100693	100936	102327	106900	104312	104677	106885	102737	101894	104815	106095	105996	108204	105173	105025	103003	104389	105045	126426	127898	134604	125294	100551	107632	105790	107612	105701	102626	102855	105899	113495	123245	119494	117356	124034	130900	130540
390822	326777	315602	487794	545212	589647	594630	579796	555242	582407	587174	584456	528216	544348	569456	617988	628799	631951	642844	650124	663152	634554	677548	702762	676457	666536	656629	684632	654413	625631	644429	628671	618333	620955	617488	564196	529540	554629	571287	590770	577166	573604	579051	532641	574122	638137	588520	612933	624164	631034
105	134	164	131	158	164	95	140	1493	961	1339	1362	1117	1315	2864	1447	7655	1930	1891	2777	2431	3118	3081	847	552	5488	2830	2961	1340	1620	1474	2065	1630	4377	2194	2188	1616	1771	1522	835	1708	1815	1945	1681	2138	1466	1840	2574	1904	3705
965	3459	646	734	4286	1961	2895	3304	4044	3739	5320	5682	12799	7694	9517	8526	8574	14205	16914	16039	21507	11996	12662	13428	15130	12172	11088	11908	11394	10931	14777	13269	12010	12052	9932	10636	10117	10819	13586	10648	15631	11635	11888	13459	12005	14354	24579	18842	20517	22703
19433	20696	20523	16854	18778	19147	19257	17713	17633	21044	21793	26503	29021	30451	35642	36043	31791	30801	34087	32823	30164	27975	35005	33530	32430	32295	37370	35421	35942	32351	37347	41437	38221	36256	38792	38712	40922	44046	42453	45456	43014	49526	45235	48697	50251	47125	48214	46008	47084	50626
46	112	36	36	26	1905	24	216	465	112	135	132	121	137	345	105	468	377	101	1451	17	231	334	1074	2262	2809	2841	3189	1696	1235	1639	1664	2372	3661	1062	1557	1222	1428	1455	1434	1541	1244	1614	2043	2248	3513	3549	3605	2482	4521
0	0	0	0	0	1	14	9	6	655	1688	37	26	232	3476	33	327	615	71	530	40	34	691	29	28	33	118	43	172	53	56	333	29	40	35	33	29	2696	1179	181	39	31	39	1273	35	34	54	40	33	466
349	219	307	749	929	503	469	625	852	2126	5234	1736	3118	5260	1899	2532	5089	2851	4838	2938	3732	7072	5719	6392	4105	9062	12935	12128	11687	14761	14479	11343	24276	23802	19812	31891	36094	24618	25644	33342	38912	40691	27865	30882	34487	36137	38430	39713	45492	56195
2255	3465	3694	4852	4452	4054	4602	3633	3979	4984	4048	4333	4439	4649	13049	11132	5232	8872	10773	4715	4132	4375	6351	4193	9894	4405	4305	5300	8418	4682	4705	4538	8445	4465	4385	4879	5514	6248	4772	5663	7532	7130	4940	4834	4249	4571	5051	4967	4967	8270
906	9836	1061	2802	5656	4562	4611	7337	6734	7763	6183	6772	5864	9157	7847	7393	8171	9348	10845	11695	12431	12689	21256	22271	20983	22154	22854	19444	24233	23813	21347	25126	21345	24886	23435	23504	23237	25806	27562	21680	26275	26850	25246	26857	28459	35640	30027	32815	31714	31368
163	135	113	114	1014	7480	27637	29594	27846	31263	32109	33374	31694	30406	24048	23891	14868	14082	14482	12633	15229	14257	17278	9793	14347	14830	17679	14545	16073	21032	15166	17690	16010	17086	18277	15528	17849	17962	22084	21548	25355	28968	26803	27639	28607	23924	26414	27867	25695	28452
3450	3492	3530	3892	4413	6353	6474	17135	22293	23644	31115	24370	26121	30998	32399	33259	32016	31234	32589	22575	24121	29925	43136	32268	32910	37650	36495	38015	38445	36248	43599	46264	43332	40073	38916	41739	49024	40800	38702	36037	37647	36611	33889	31467	32981	33992	35802	40378	40388	45696
5418	3237	8552	5490	5189	8927	7689	4507	4119	5102	4750	6036	4965	5624	5200	5542	7763	7849	6875	7377	7682	7420	8017	9555	6560	7141	6952	12418	9805	8008	8719	8044	7479	9571	9431	7747	7996	9134	6777	7731	8228	8051	9504	8614	8450	10989	13165	15805	10211	7857
3671	4692	853	910	785	2049	8774	519	11948	20518	24692	34900	24154	16834	22129	31411	31668	26897	17748	26417	21242	5101	1613	8268	30703	21583	32237	39497	36185	34476	35168	31017	32320	22468	14326	1373	25785	16519	18587	215	37306	37332	23933	38721	39302	40198	44338	30250	28188	22076
363	306	274	350	266	216	3308	6975	4264	7117	4900	9823	20426	6062	4549	6616	28045	33525	33743	32163	40558	39486	36644	46491	58040	50183	63526	50403	53693	60363	56287	89446	68562	69890	67731	68132	80580	80981	69641	73305	64385	73581	71258	60908	63488	70739	65728	65430	70276	59938
8101	429	2925	6765	4315	8328	6242	5636	4530	8383	5058	7295	14340	16211	15104	18530	15281	16743	12062	21563	17349	17448	16853	21033	20422	19345	21800	18669	23177	19199	19290	21013	23820	23301	21170	21694	22450	20416	24651	26726	27783	32127	35705	36276	37242	37997	41623	42733	38112	36648
7517	6050	2654	9608	10572	7742	7741	12032	6724	7984	6368	6758	5852	6163	6979	7289	7019	5702	5691	12864	6873	5720	5330	4866	5363	6234	8044	8919	10884	10604	11641	12810	12230	13025	17564	18654	15740	12752	14810	13470	14381	12918	12556	16538	14030	17547	22634	13882	14684	14133
1507	1461	1390	1445	1538	2687	5682	1404	1407	1640	1521	1473	1466	2558	3721	2868	1336	1726	1733	1955	1283	1868	4554	11897	8338	5723	5988	6247	4557	4242	4221	5881	5296	8699	3379	5617	4862	4776	7557	7322	6602	8369	8079	8306	8448	8141	7787	8443	7114	7732
5547	6461	7142	6509	8516	27010	25090	22355	24738	29838	29395	36398	28874	32734	33726	37863	38262	38667	33614	38951	46602	43316	41515	46291	44850	44841	49067	50142	51458	45466	46450	41793	38386	53892	57073	43044	56320	61638	61437	57737	49394	59726	61166	58124	69005	54041	46659	57020	70597	72757
346	383	365	1224	744	3023	1095	2991	4528	5718	6815	6408	7582	11158	6765	4580	7327	8501	5819	7155	7896	8061	7829	7150	7619	15381	15579	14877	11588	11843	13987	14927	22459	19116	14621	24887	13329	18508	13791	13773	11642	12523	12790	9857	8709	11804	6808	9620	7622	9332
1040	1091	1119	1129	1090	1185	1140	2675	7087	3186	2926	3609	5502	5468	11923	15999	15866	19578	23728	28642	26228	32063	28977	29854	27858	29775	29516	29342	29508	27961	29702	38629	39602	42350	43928	48468	44917	45427	44945	45578	42804	44354	49939	42491	44143	45431	43448	45677	47759	44954
7727	498	457	7037	5711	6278	9733	14717	10077	21562	23732	47533	65233	66957	59439	45583	64434	82415	114592	116142	121418	112657	113744	118610	132089	126296	142613	151503	151650	148865	139888	141266	125839	126764	141770	117301	98911	108799	145909	143230	140507	140757	144931	151322	152391	145038	149317	152299	150537	138184
38	42	21	1782	577	54	1803	1812	3562	6995	7230	20870	26950	19857	21004	25397	34107	34169	43609	47228	42845	37515	41994	39082	68293	65287	58906	70689	65642	67022	73367	74468	70663	75424	81332	85767	77470	75129	75192	75387	84534	78263	76974	78930	86306	83950	85521	77705	93362	76137
154	7227	7549	8844	12408	29832	41680	38361	38628	38034	46734	48247	46603	44865	48216	73727	86976	93130	90584	86709	93383	87301	92857	97534	110189	117405	112018	114211	116756	104195	97974	101668	117570	123474	126989	129105	137795	142496	145776	145605	139674	142294	147200	160454	153653	156744	161686	169023	160464	155259
234	218	654	183	340	779	215	204	575	1300	239	212	295	3684	207	1270	246	6287	1576	1638	417	1049	204	212	1576	913	216	1526	1739	1904	1874	1977	1978	2086	2896	3578	3947	6485	2840	2780	2958	4024	2481	4832	2962	3141	3392	5287	6310	3583
432	3126	3433	4367	6263	6532	5459	8527	4790	5015	4958	3200	3249	6411	6936	6651	8282	9574	8710	11885	12077	11347	11312	12627	12714	14842	11236	11636	13972	10701	12200	11499	11016	11933	9613	11400	10395	13583	13042	12224	15759	10175	10889	15372	7127	11431	10047	11439	10936	11954
32574	34718	32125	33927	33723	32033	32282	29229	28289	31959	26518	28267	30478	29666	29773	21534	22775	24620	31987	32227	33919	31842	31093	32668	16444	40933	40851	34740	45557	41061	32335	24505	43483	41824	46233	42127	40984	44209	47367	41890	40523	46113	44927	47040	47831	49809	47517	47970	46598	40581
590	815	812	1539	1166	1182	1148	1252	1321	1203	1024	701	681	1438	1001	1439	1763	1491	1250	2196	1138	1029	1194	1164	1134	1147	1119	1679	2175	1301	1128	1150	2088	1034	2511	1122	2738	2877	1577	6979	1165	5195	3980	1174	4644	1906	2643	1345	1341	1161
169	6828	8591	8698	6355	10841	8302	7222	7739	13440	12509	12190	7061	7636	7732	6032	5185	3863	8285	12679	6448	14261	6924	6101	5788	12253	7513	13849	7006	4960	7477	21461	8429	9315	9641	10332	12157	12021	9663	11728	7682	12059	6972	7699	4848	10064	9499	8649	10357	11077
14285	16832	14156	12986	14310	14744	15067	16011	12800	14708	15242	15418	17494	17833	19617	21202	14013	15195	18602	17353	16537	19017	18019	16762	19042	23050	16877	17769	19028	18884	17131	17051	17352	24159	17758	21984	19644	20977	26808	19728	21396	21612	23014	23450	22384	20191	20577	21964	24434	21218
421	902	635	806	886	1215	1474	1614	1240	1784	1602	1538	1752	2485	1507	3853	1828	1040	1606	2676	2148	2054	2062	1983	2223	1761	2833	2871	3016	5065	3711	4274	4519	4118	4774	4565	2780	3406	4617	4684	5014	4885	5781	5585	3667	5630	6524	7334	6568	5800
304	3654	6210	4761	6942	9994	8488	12127	10496	8314	8374	6983	6941	8181	8301	12320	13419	18181	13038	17318	16855	15178	12980	12007	10891	11125	11272	14069	12007	12569	16133	14375	12296	13251	13905	15344	15149	13025	14867	13122	20972	26176	17043	19577	13251	19380	47660	36868	20363	32455
587	828	820	1254	1166	1182	1148	1251	1324	1397	1025	701	682	923	1024	1450	1679	1491	1250	1615	1101	1026	1145	1179	1161	1157	1794	1547	2134	1117	1003	1149	1265	1034	1824	1116	1213	2697	1140	3904	1178	1100	1139	1179	1201	1319	1501	1350	1348	1124
417	897	638	811	883	1215	1474	1614	1203	1698	1568	1537	1685	1960	1501	3853	1826	1035	1268	1838	1213	2444	2062	1984	1899	2815	4720	5194	4162	5113	3742	3893	3173	2876	4620	3968	4264	4310	5084	4754	5015	4888	6052	4381	4178	5828	4106	4786	6916	5800
360	386	448	421	6461	376	351	3944	751	3375	2312	3648	3473	16554	16189	2819	3279	8789	27435	20202	10960	12846	22397	24069	21435	21579	20862	19954	15923	35523	17722	12464	15741	6066	516	6981	9750	8282	14791	5914	9194	10347	7523	7068	7251	5226	5768	5534	5956	5815
15876	15393	12778	13017	12236	12087	10589	7520	13446	19621	16916	18270	33365	37742	36384	17786	16683	15462	23372	34223	40617	39199	30798	31889	23970	18076	36419	28909	17916	28377	26594	29270	29641	35817	41885	31469	26946	30577	32233	29438	32227	41486	38468	38436	34504	37582	42503	27994	26756	27099
6469	6122	18346	31423	33113	34599	33402	31209	37392	41922	41176	43066	46238	47276	48597	60782	65196	63632	63044	64684	65957	73743	78884	71064	75094	81437	78075	83733	81866	80158	88924	90621	92509	88860	97607	93720	94990	97172	97813	101948	99873	100350	97215	103732	101730	98035	113336	103636	110905	109638
2753	1816	732	591	540	3211	19541	16862	17351	18625	16782	16935	17630	16928	18655	16401	17221	17904	17429	17635	18555	18444	18316	18696	21468	18956	18927	17721	21278	20242	19702	19266	20746	17607	17881	19071	21567	19834	20024	20794	18967	20567	19600	18947	19616	21818	21904	23915	21851	20647
24	22	15	45	2534	1587	2770	42	1894	30	53	297	4214	62	57	9650	19007	8943	6587	19842	15877	15226	18319	14900	16061	13541	14055	13495	18084	20047	18180	16992	20068	17319	18439	17982	18427	18541	22257	21037	19624	20087	20928	22176	18862	20567	20004	22449	21807	23159
170524	235616	258923	235354	227404	254767	320577	237312	280763	271937	268511	269456	281777	268172	314986	303632	306044	344399	475221	374434	344775	332058	337868	412596	483776	397527	436114	425493	553836	470767	461255	492550	562480	660165	669071	670605	681517	691982	768521	812485	801241	1000231	907777	963641	961324	954802	979471	1013961	983554	984529
5382	5254	32117	20607	11458	18362	58583	53009	26696	48771	54944	49445	98394	105957	127421	143571	138023	125401	130846	146085	121385	121542	117619	87651	111586	105168	130846	147817	143377	170460	183326	149333	181654	151738	148509	162114	168663	153590	182988	175030	160431	174139	237766	250950	241672	220855	266323	228778	218329	288758
48214	39661	31591	30927	43292	54493	47197	50716	28568	31961	35794	44859	55243	53139	64207	62519	83461	72631	56914	57625	56942	59608	55282	56016	72120	215771	205896	230010	210021	214041	222667	220038	268308	219144	211920	211690	208555	207843	205263	220230	222545	226933	226895	222462	220361	230860	230369	235104	237638	239335
20661	17841	12376	46552	68260	71835	58838	71262	71200	62897	127167	109145	127579	123039	121454	124477	172573	172397	172080	162979	165239	149221	171958	169330	175317	153030	143434	138571	140224	134617	243584	244340	223120	196063	197250	199414	180253	195068	228772	220682	235895	258929	265445	271915	292303	275226	300596	285825	355068	271108
416734	415718	415581	405895	413018	397687	413561	412282	412928	417916	405634	408277	395305	412807	446078	416155	389317	362794	387165	409095	390390	394247	436862	449607	443898	423073	429369	450694	446871	440127	432689	415446	401795	430831	413176	409179	404841	424476	405952	408995	423013	431377	433718	447457	439914	445184	448308	453661	440785	480694
279378	277774	280207	278037	279839	275682	279140	274843	285300	301523	281895	295011	311011	349970	357335	345764	346438	344068	348832	349365	355106	356810	360862	364113	364924	358980	369184	365924	370029	363573	370683	374917	377983	381060	374839	384430	386724	390707	387651	407960	401559	407455	397184	405194	404843	400057	410328	413508	408197	412802
181250	187324	207523	216328	218975	210723	208017	170010	195195	176464	192584	172850	185203	216113	210548	202428	193988	228674	232241	216605	193295	227624	216199	207207	193059	201364	211303	227174	243611	195683	188018	276021	304738	332548	376201	525456	404930	316264	209147	180639	205485	240903	211594	418051	304517	217483	235989	199651	194820	256208
455078	442602	461962	469294	485090	482072	485976	488740	508870	497396	494174	516528	469363	487902	489909	484071	507368	497816	513840	478286	452809	443197	459840	456412	460269	468389	487015	478470	490606	468246	447651	466960	445449	413728	426700	434543	432928	444234	458272	395130	393980	420324	416635	384378	451546	470318	480598	483721	488545	476634
161690	181713	157774	163058	163942	160224	161825	161908	155675	153121	515777	127006	129195	118608	111744	148230	159303	166924	173125	166026	183208	181200	188454	200649	227337	220570	200849	206185	223821	180591	173030	208297	173647	164248	159932	157028	156822	161119	159065	162090	152167	160998	158918	150022	154879	154715	206162	177300	195644	222632
580962	614585	633954	646399	656325	628972	634750	632987	650825	662553	661273	655145	645830	654966	652827	655791	681275	704150	693507	682922	682474	689080	688602	679621	679173	675894	656137	657640	668662	673592	684144	672965	680961	670688	669307	678483	656865	686863	676561	669875	688402	691065	698969	689838	663163	662214	678684	701756	698784	717527
251945	250112	251550	265056	249142	254597	286400	292546	279921	297048	302806	292305	332150	315332	306091	306267	372240	411477	367202	296407	249997	276046	322765	320978	322699	300158	329633	352785	329207	340756	352832	354081	328401	321571	347884	361879	361522	358618	412626	376420	426452	323127	270764	245963	311072	404896	491239	554571	593213	601487
94678	88365	87099	88288	92340	85494	85993	119044	186567	184960	319125	175602	164891	165419	162138	141931	169504	152341	142518	149128	194273	190021	183199	167448	167707	178296	203682	183447	178791	192914	180195	185796	179825	219842	178219	178598	209978	180451	182892	189852	182065	174926	180128	186491	191850	181327	184839	262721	175952	191112
594	2368	4254	5680	9383	11564	16117	44923	32358	26942	43591	54897	35411	54999	46955	69200	55924	58471	56194	66183	67364	67549	106903	142152	138716	144053	162978	188863	172025	229317	231422	262106	279070	262566	296592	306041	323871	419659	420390	414735	380463	318746	459174	532314	539707	525888	551171	625696	644373	584368
54296	130611	149252	117801	242900	237174	249156	252667	227681	232096	253290	223532	243270	219930	254055	386744	312688	325439	305691	313299	311065	317404	345973	395926	391707	362961	371836	351973	390311	373081	368065	399615	387457	367009	401339	431772	438539	455145	449794	462403	417055	403562	426103	431989	395709	445243	491462	462565	470031	522422
1239	38520	84047	96678	48444	50457	76118	85875	102486	62883	74272	152646	64408	114632	104742	118852	143283	185377	183948	146794	196923	156608	191249	149494	153238	304196	258229	314423	226370	392551	356551	390794	392688	394844	379914	399707	425816	410018	412233	458818	432209	472677	404815	422782	494847	500677	456810	499447	483837	478314
1265	18003	992	5826	972	1049	1166	1255	1038	1190	1175	1524	20401	1059	1218	1190	946	14042	1522	61526	3923	14657	6032	4389	1076	1169	934	1705	69834	78758	4015	19266	6651	1053	85127	1069	9014	1012	8344	1055	803	15212	980	964	18969	21369	1083	6393	7466	1118
62648	65251	63579	102916	154605	187000	184559	167389	352591	339161	346611	335790	309519	490628	498055	564764	594736	597341	604021	589335	782217	661933	649312	715486	642861	679452	653202	685825	850983	867620	926560	930224	903919	849365	904986	896645	903787	892023	917677	953767	879354	1000197	882377	864960	925277	971257	1038058	1087855	1026270	1110655
29345	28915	31122	47864	37126	169903	263418	261806	248170	217413	263466	238471	208206	331796	236117	345185	254495	290887	348955	313104	367486	413641	482253	443417	570116	558308	542875	569746	591829	566167	601769	626550	586540	655539	706944	649387	719486	706578	779726	833434	832969	830935	825542	784435	743484	833161	768517	821881	846858	840181
703	20669	523	758	675	2128	35287	629	19006	34747	5342	771	150792	7025	656	798	742	765	92365	622	5409	63579	665	571	21416	21292	54511	9853	19012	9060	8794	11249	9642	11147	11652	12135	61044	40881	100841	47750	47397	69989	44329	97004	144880	44232	48182	53575	48361	107740
1930	3047	2983	3931	4358	36551	19775	4488	20313	174228	10812	14408	16027	12168	6409	132056	4035	45874	46686	4036	3899	14897	29969	27931	57735	57263	135180	197570	79708	146633	140942	164570	127865	95277	87931	119049	103891	110654	153793	70878	84706	106408	101692	90116	231914	82644	80551	77390	72128	211439
25350	1256	773	64402	1478	14037	19752	11796	9688	158821	280004	1802	6092	30651	2040	2094	40544	3151	1978	12129	18900	16077	22148	1885	17651	5638	74296	20571	1968	16856	1855	3964	2031	27003	13112	2592	1876	9093	12397	2098	14528	1445	10124	2110	27552	2201	12087	65506	2066	1926
247	222	40387	76324	168	67273	14949	20557	7223	42219	13077	13831	8083	5845	11577	14758	28548	45731	32863	54746	50279	44024	48398	63704	41855	249329	84627	145808	129420	168397	148983	153678	164619	165887	104852	195489	133658	146934	140688	140312	189157	143127	162770	162646	142185	176219	195224	226188	132450	147597
46997	67898	57258	12210	117627	105970	101027	113142	132285	126148	126298	119858	127085	127804	99421	71582	86618	86438	179794	123993	194911	127692	124597	170315	133716	106667	100211	169453	156190	86861	81643	147358	204342	106004	91359	160964	134025	141228	182965	224327	197029	224317	372837	281106	215370	185796	236193	205194	215045	219633
32386	155513	145902	161714	173966	220002	246197	235400	333513	375294	366706	359542	228459	185691	184665	143527	170198	292227	443454	343425	449284	543156	439884	543874	482888	515740	495005	572638	547324	529843	468769	396881	458685	432583	489311	577446	597549	673164	780441	731780	710540	846844	771461	774077	749590	752125	762534	802058	815369	783432
132452	280812	333543	136854	120585	172614	280973	322537	448710	350101	84193	40673	113030	170812	165476	323545	335491	389558	407237	439844	468437	466945	525678	522942	497632	483539	494346	590175	506681	497871	506069	520566	582571	521570	499272	526536	563865	495596	509060	513181	450291	475746	466171	489717	494545	552476	408951	437470	405859	451593
71892	52127	53238	41781	87035	98759	101736	106376	111150	94477	99958	146333	108590	100495	142666	113230	147402	162780	181873	183849	204826	247926	218240	246420	217075	202874	201919	192113	239070	222647	243152	298435	263952	247694	257217	266718	275742	230892	288417	277405	376574	392001	395824	412379	504986	510245	407128	709881	451872	473533
33297	10264	61496	62234	59854	56673	96097	78685	68145	71010	135255	87030	71743	94635	134483	110929	128171	141450	164883	112354	169051	145555	133607	127895	132301	148124	127498	129486	136640	174266	196411	177478	132684	40645	41284	43198	23734	28296	52166	160970	139390	134004	93868	100250	113068	162050	103572	124593	133339	135316
97770	85307	92368	94239	70679	108702	92270	70625	99888	108580	63645	78532	79842	102217	109373	131177	96242	100939	97071	127553	91033	139007	115732	35694	45356	87443	81638	74643	129784	86592	72519	63254	75555	83115	69737	82717	110213	121859	107826	102219	119587	122255	132300	125064	121255	130763	144028	140546	143112	139940
454	52234	23543	66492	338390	23981	29512	36510	25938	29973	36390	26349	47376	62665	26951	48882	59827	129139	277341	37720	182989	117712	112015	208720	216819	142342	137693	139651	127175	144785	178531	143382	120044	185660	131484	125258	125959	130549	133922	127451	135142	127952	129148	171376	129363	128097	122765	133095	128154	125969
1794	1646	9471	34228	147901	94784	90232	93255	117301	89291	95083	249103	215376	235230	176341	202144	213084	245435	210085	197271	212096	240830	224394	343111	241299	298311	189685	201607	210565	235024	243255	310302	241984	278887	318564	278412	259134	272279	254952	238211	276927	356996	269094	265860	254207	263055	264816	261409	257152	289150
179	146	95	180	234	231	391	289	377	354	511	442	356	7219	347	36002	14843	77434	562	42309	41600	32916	1333	27379	392	58523	52253	48914	46521	45742	45183	116066	47146	248184	65397	89228	23623	75022	74717	41861	136399	72870	63306	139093	55752	152093	56406	160937	47397	111932
755	701	5455	4061	18087	10523	27939	43901	37650	62648	61631	37841	10279	11603	76013	56999	150217	74775	114059	95467	74523	91289	87214	134518	152851	226730	140616	75480	125420	113417	124979	109312	137788	134862	225726	232488	165199	142822	181324	210380	164964	167233	126036	151052	187215	150620	128646	134612	129898	123174
110340	42446	71072	57889	65882	194758	146441	165127	170522	132633	117043	119160	129387	141867	177825	187796	172175	183354	185348	151905	132340	112687	124895	103998	114404	173313	105740	121862	151890	173220	179762	209687	231295	248952	253668	336024	273835	287546	382736	379251	404164	481095	471995	509167	481812	492795	525572	528205	533614	530717
5427	110996	129160	131733	206291	195694	215704	186053	185090	190334	184977	197868	191731	183185	173003	218967	220690	205732	220018	205495	171010	205782	288462	340226	299822	148366	168893	227377	217969	230598	329892	228397	242440	219370	226108	314162	312947	335915	357905	452726	456087	486923	491380	458751	486498	532415	487721	547672	647327	574262
162192	164905	165313	146110	140056	146599	166354	208453	252811	265027	266312	330089	289326	351900	313448	305358	270380	366877	413280	416851	414971	487992	414481	434502	516613	475224	435128	444500	476177	433170	419820	455165	467275	475164	513064	588321	567230	543166	716446	729809	713214	777280	784017	745990	736011	722144	1026408	942474	853120	811618
6578	9210	57908	11547	10221	10201	57611	10816	10977	9482	8936	8667	14140	7559	7437	8843	4944	7095	8516	6276	7816	5679	25233	9428	8490	23011	9534	11057	11511	11354	12912	12192	23812	25813	25461	12635	12346	11689	21153	11389	37385	11638	34448	34939	14482	11676	11359	11428	11860	11192
54552	22685	77114	38770	80748	19321	23984	213654	71071	18676	236986	48207	47031	29697	44428	42810	18950	30074	23516	112181	34268	28090	20745	33766	24459	22186	25497	32302	32109	28606	32153	33891	44846	38817	33049	44451	39092	48851	63015	46480	46893	58555	43505	44439	54040	65269	60143	54837	55158	47366
70498	74991	93810	89032	96842	163069	130174	164296	131715	160424	136868	141474	141619	143944	150709	151075	144050	159839	145117	159516	138967	149180	148902	154591	186665	167589	155249	162033	151433	157920	154590	189986	198610	223422	210312	238170	233458	241089	269052	227703	270252	255537	249952	257833	265300	288450	286856	290802	357313	311589
239	16824	75168	77974	63408	75896	85878	78911	88814	73615	74326	76637	70195	86312	78320	84887	88940	98073	77917	94261	93070	110095	55215	50522	887	3582	61247	42621	97254	118991	139580	236508	219964	212398	241805	230537	234573	306969	242716	255666	284198	252772	262478	268239	272363	281942	270827	278970	280838	281601
276	196	229	45375	245	13016	203	177	413	168	227	296	239	448	16593	1203	1072	2670	2144	4301	903	664	884	815	1275	614	2521	11889	1874	5894	8259	8032	6074	4098	23514	24336	7386	14285	4624	4050	5314	6640	6619	6200	3902	4925	6648	7241	6437	5004
49952	3870	5262	4458	35033	6412	6756	6968	7343	6881	10667	8683	30654	17722	26230	21596	11450	12404	30102	14862	12577	23748	19175	19985	24956	21314	21417	28542	18081	19962	54308	71452	228422	72645	318587	317131	352619	333910	352056	353859	366127	300457	331219	130557	29816	17656	15938	15343	14496	13952
4227	3307	4431	4159	4871	5949	60581	18750	20279	42206	17942	51107	41095	25358	20930	23530	29137	19865	22237	29776	27497	42454	28773	29068	53365	33197	46632	37964	57627	135495	147056	42341	98175	65485	40340	34526	49488	60098	29851	31876	43038	31539	30449	47611	48938	65394	16007	17307	17687	18150
4501	22771	6419	25719	33863	34028	92455	39560	57075	41312	141574	119493	95287	204010	234366	391725	267693	243234	374546	378857	362445	381763	432232	462551	496935	550431	583364	603735	572830	522998	558004	582241	596328	598216	635392	616645	673457	666142	637149	682917	739066	696377	761491	801315	767579	837951	759597	774898	820660	917620
16261	15228	22043	18731	58924	50891	54614	67337	79313	102657	191933	184150	243010	249158	213650	183404	180954	182906	211291	363424	364964	342965	361970	357220	329381	316544	326235	307262	294647	301161	337778	354396	358270	335462	233261	253751	342615	362166	419173	398122	361059	516375	545374	500218	574432	827356	702248	805508	786188	842135
27288	36274	40906	164716	105282	203924	238207	298560	324611	341342	361817	365149	357171	379740	369851	362174	290187	297923	405290	488862	470390	464220	484342	460819	473276	475891	457627	475744	481508	508410	486845	500494	500878	526598	469584	507553	491734	507376	516328	504343	507358	524144	447712	428678	481283	438016	508936	499628	479523	462176
6501	6018	5699	6215	5866	38995	33758	59056	48712	25776	72232	27605	103856	69956	53652	56066	58542	103992	101378	75838	49235	65462	74580	83960	91357	101405	110691	119435	132836	120565	145045	127532	124842	130548	121056	116015	122719	102799	118396	96646	94508	79078	98364	106061	126203	119463	189151	163634	159844	221985
25228	26030	34989	35659	48022	36826	37102	35187	57643	35609	91800	42233	93896	36885	75586	90334	62384	47534	41493	38938	43367	107820	74517	86511	33059	57240	26942	50857	24190	29773	45306	24593	29056	29696	25721	29829	30236	30498	34581	51323	32997	45576	33841	44813	40091	41900	47416	73930	40719	41855
420	58489	49878	220355	471562	469635	681278	695365	692165	699374	696486	838186	854214	977941	967573	1012029	1054056	1073326	1152644	1220554	1164747	1182882	1335316	1278125	1213338	1289420	1177213	1221982	1336782	1343230	1305854	1353195	1537962	1506477	1547547	1728055	1663934	1664459	1660478	1610839	1624120	1704201	1718035	1686597	1733699	1728544	1828804	1796407	1655725	1552248
127079	136947	200146	278693	245725	270479	319538	285412	250751	257426	267023	250607	265084	247922	276065	271259	234273	87367	59316	148335	184946	147476	230214	335506	267415	412882	356060	334512	431557	336378	324873	310930	295933	263417	283266	297847	233790	366354	450906	362588	445487	366709	348330	416646	390312	440323	488849	448340	437885	421595
119378	121876	118727	124348	158617	219526	210770	490311	553932	537192	655390	574973	613748	672507	728791	723909	739024	717867	887221	798929	571308	841816	968704	1195227	1179496	1253619	1330893	1327606	1451955	1439912	1514778	1540608	1615281	1619883	1631258	1705539	1650890	1750058	1701514	1741074	1769439	1888329	1859806	1897226	2066553	2055586	1988362	2304764	2248984	2262348
45992	45485	54944	85944	55094	41933	51643	68390	58152	121721	148725	89453	62924	62170	78136	610868	254003	397607	305902	408960	346454	323464	498400	487836	523989	559087	530116	570499	503918	509303	506262	554391	516382	547140	533132	520042	518139	538459	541689	542842	565467	528539	547367	544232	588356	581853	578495	549529	589120	571688
9889	5288	4496	43254	83229	78839	83408	83158	62446	93151	85297	122628	139947	173609	156219	185901	312816	289949	278194	366330	422186	344647	376954	337961	402152	368603	420148	405984	459462	394328	409446	422989	441873	484363	462838	502615	646294	512579	488028	497754	504293	453550	540151	459647	518866	619229	565418	481086	545946	523293
1146	74783	24032	649	4780	120735	241267	237743	235393	232496	235272	201257	256035	234197	169321	241507	351872	403082	422187	451976	468611	494644	605065	687328	627593	720451	566249	536756	546041	441524	481552	512785	497774	588519	641333	611826	580006	668291	750879	763962	915661	878737	911454	900791	960666	1014250	1029560	1024453	1038552	1021308
486	7816	7667	10633	20304	31312	120367	72801	69424	54665	80014	95979	109541	113881	155480	140552	123395	119383	134689	144993	124239	147817	177741	88898	202436	185821	225269	235466	182411	243712	172855	210096	109246	135601	126362	108891	102529	116688	144241	150720	118318	257575	298401	222434	212204	207622	248560	241139	201113	249125
134	266	1282	486	982	194430	217377	245014	252437	256119	236614	246726	261882	269080	292870	265091	446724	261792	250990	262836	220463	279234	325148	311800	302242	273940	290577	341432	266965	276914	287636	282386	287366	265503	308549	271130	269543	257592	291124	332644	328887	385033	332263	311750	353983	311535	330887	303881	295560	348849
1704	28511	11045	28196	15852	28234	20605	12564	33928	71478	61425	45349	51440	43541	57222	104330	51121	40723	86684	60060	44102	50779	37956	47237	47357	26963	45705	71818	87297	68449	64846	89343	81875	100626	91221	92955	150610	188285	98121	116392	149638	140285	165594	253986	210183	200363	294855	158684	202806	363202
2342	1930	6648	2525	67095	74730	6968	23743	44878	100401	94313	117588	125733	107613	113272	109183	121886	106161	131889	117150	130463	124108	150868	143278	147347	197598	163061	159863	146921	230358	167810	171682	186073	152684	181932	231207	333432	214009	247260	204311	241630	266779	257081	224527	233004	224998	273623	297968	274663	275067
1171	2283	37276	29456	22376	23023	21026	51085	23498	22362	22059	41597	25374	58128	46100	55923	32970	24846	32559	23906	77258	30099	29882	109851	35955	44783	37145	55531	39047	46559	82360	49938	42939	47729	39354	56190	51905	45953	51556	45060	56227	51191	72364	52641	60127	53289	46777	45477	46425	53445
35292	22410	16749	17188	13075	5436	5076	46147	51330	26832	69118	43859	11808	23400	80005	24666	16181	14093	31710	21327	22166	13264	25728	13760	16768	29074	24153	27318	32438	39902	63547	39523	85823	101441	98352	69010	76164	81454	122265	196262	99072	97087	145553	132364	172711	242656	258547	238137	275734	310566
16692	1082	2915	20033	111992	36521	19771	22	7074	37773	50667	15713	15815	14687	63144	55743	101930	81006	79138	84333	80022	91374	77580	92542	89467	89601	93305	92787	112060	83940	85618	100176	102756	89095	111671	107801	93865	103004	95178	98411	112407	101109	104424	165376	163629	133616	136202	141554	126826	114414
30673	4793	889	1255	1793	6551	33317	15136	84026	30146	2466	14024	38232	60246	17839	47107	39818	1892	59227	52945	124925	52784	70903	71642	92675	74144	61990	67069	177206	50379	95429	127948	77389	65731	83516	98357	60943	77179	261731	420449	436290	530480	440579	587580	508149	554426	603266	565077	712035	643104
353515	665857	694715	801123	807461	818005	796378	847470	763625	796004	832293	881756	895787	976849	913935	1006720	1178158	892933	982465	920777	1042769	986973	1139482	1237185	994829	1209189	1283418	1334522	1086558	1170460	1270827	1409378	1489009	1473052	1660176	1388395	1588985	1889238	2374496	1781559	1860957	1601935	1499883	1356248	1383514	1620006	2123707	2298046	2661975	2596352
10517	6873	76992	141524	138508	164661	207429	400436	365026	306453	229677	253346	246394	242528	193357	191284	323521	300049	292416	323794	333064	309925	420952	413966	514239	367728	444396	471624	462633	311502	284575	450170	426522	319592	356473	451394	422438	505788	418207	533638	543568	642825	724339	490235	529538	463471	525505	413897	447786	569508
75128	6692	42967	2383	2209	3742	25505	89103	3815	11699	29848	3597	92733	87662	85407	97178	95332	83737	92700	102995	107312	98056	96894	83235	95570	109786	104413	84054	80979	89717	94871	95986	102295	123090	166422	141542	140861	280364	139991	146288	91914	108890	146913	163425	229115	166704	129862	110147	221129	139679
50479	42116	31231	26648	49544	82772	65294	133310	148743	160532	112424	90324	7275	12291	81314	122629	137264	161286	331095	360123	451838	368652	423006	501617	499558	498754	440163	492783	496507	488178	633389	766517	818649	761747	713587	780461	704188	671127	691673	600233	693503	681688	647131	826215	806570	763624	783611	846617	831028	853580
69397	12206	14773	748	41262	87218	9469	24528	23497	23281	62671	74095	58410	56269	105120	113807	14590	62126	30413	85498	39182	94362	102901	80365	75988	53218	49167	18552	27938	64328	20085	40379	44785	69684	67765	22628	30575	34659	93953	43408	60552	48168	34121	66846	37602	49229	42808	36129	61991	36236
243221	227465	202018	192071	189460	179304	203896	188325	231110	234654	328850	267625	266567	267547	273171	231745	249337	256015	271117	264909	278631	259056	368483	399249	413868	464218	475228	473789	492783	551342	522000	550904	517877	605249	629791	575206	643654	636974	650424	648279	718803	655026	711269	783227	825188	821623	869106	824522	865190	844081
40805	81338	88339	112895	86678	82015	83656	97242	91132	115037	112992	168856	246041	280916	316075	285488	369741	372514	398094	404390	415094	435693	474357	557859	558247	616345	571672	565843	567056	547799	598126	692880	779823	750392	802518	806073	888342	943622	875911	960135	884636	923507	833246	938214	967360	917682	791785	725435	830875	791956
28375	1309	1943	3648	4785	46644	7176	14086	12778	17028	16750	87894	100897	89769	72907	116348	99173	65763	108571	124133	67272	85686	109032	175319	140893	186346	108555	60004	103598	35577	76710	47456	90082	109544	105927	183136	147358	197500	209508	219380	219627	226047	202175	257579	279982	292811	310106	324696	353992	357707
54135	9440	20218	380	3976	942	144810	1282	21906	80458	102721	121806	153800	261314	219916	215296	283401	261223	217558	173834	224593	239328	253988	275037	275638	287417	383070	337095	379547	299383	403185	381375	536915	536590	585864	705096	683635	638271	625650	632329	585844	577866	646503	691929	759104	696690	710288	769886	807532	931647
4122	29707	82929	166707	185026	189060	224676	306482	298403	356335	545988	557267	614775	698821	734543	761484	930866	905749	1046258	979251	1040367	1143395	1095821	1145499	1170295	1321401	1304290	1445570	1602054	1639314	1785862	1918596	1853879	1951117	1932468	1979098	2122952	2088929	2110162	2261827	2187243	2278258	2275997	2322902	2299222	2254716	2387729	2381029	2513232	2579909
475	732	4694	15975	1081	21854	2406	83608	19066	33095	106765	200374	231111	203881	218507	159803	169709	102626	82217	196814	304508	172322	463687	371921	216574	238843	121236	304075	295107	390394	340604	335448	397168	463089	460407	476981	448240	426399	431327	404898	361866	409610	461436	502960	593794	565634	524505	651134	761293	688982
48648	66157	9	32068	5411	580	19628	236801	6131	121460	7395	1847	73643	37882	79583	108910	141738	338570	607292	770802	752006	717238	851904	787255	859837	555752	286036	255419	460725	611453	927252	1025310	953988	975490	1011147	1073958	1004634	928647	997694	1009002	991626	1106049	992771	1099472	1021868	1124034	950511	991006	926044	844590
26318	2677	31618	27299	35655	128874	189937	197993	340625	428563	330027	199905	264892	282559	240634	262890	442701	388013	385088	236066	379442	344609	309724	387656	359415	475328	375088	433090	506152	776044	457524	412887	629169	610710	611497	757426	864811	878549	722684	832003	717502	641639	618769	772745	738389	740858	789727	555659	910562	793927
8382	2722	20626	8796	54075	88458	65721	80462	143117	76396	137528	139154	162904	142369	121373	125624	211539	257241	260293	314273	307175	290129	231092	310877	310715	447788	332876	430675	316933	427601	383512	458448	551271	516491	520772	403922	390047	362490	401085	568882	611402	626153	824643	656174	688637	884845	934196	729879	966099	853719
91	199	74481	73749	114733	82774	153397	167093	221351	358157	394487	538138	760565	684566	657131	709372	691464	619807	310026	446926	400692	544736	607905	597100	647146	655537	727603	678353	657879	708613	673685	804920	740498	787149	810387	756921	765176	900213	973389	725995	800016	761447	761815	741548	766503	690329	717693	699976	711124	739517
63720	205715	340399	311012	290380	288576	294844	337599	303332	374958	453096	492144	444148	437401	461028	577824	623546	602114	605928	652378	683563	675587	719949	675798	718443	781455	631753	623900	711679	683723	651564	667643	739924	730908	811371	636537	753936	778329	798591	855074	801355	779470	756472	688345	618155	646526	603434	679854	470131	299959
21398	3696	3981	4201	11998	17069	29382	54235	61458	53951	94463	50794	99377	143454	67781	83471	85273	126140	105227	56081	52865	131327	161627	126922	71886	90812	110881	142010	144598	372068	506303	404786	350436	180296	204334	401689	114701	225775	175835	178692	232362	229255	237296	248426	215175	212249	219708	217066	227689	223342
7845	4261	5947	7379	63260	129597	157252	156259	158849	149909	154146	164482	143178	171199	159318	163599	151935	178283	164021	204955	213650	200774	208016	213243	223543	225377	239710	212752	202378	201901	228421	207944	252143	273848	263232	264030	280175	271181	280880	296451	304875	299167	299094	327648	362907	355467	347540	355642	356106	392230
5826	25992	19557	12664	70189	82508	54034	56657	76661	41978	61659	64822	63187	110254	87802	97935	153326	102326	98263	83163	106439	109402	108976	126566	118349	40184	77078	72912	79533	32699	77917	35282	56341	54506	58186	68654	105894	60101	52486	17917	47546	24945	57937	31633	59850	51157	66808	50281	70665	61366
44760	44871	110738	146396	173420	270704	190970	258193	311112	330254	348770	402312	410891	419163	385027	369950	366308	653874	735532	590535	763469	838517	987559	970699	919698	900561	867368	851294	960208	906889	1011933	1124631	1166324	1299402	1231565	1243314	1213989	1234015	1237628	1324508	1235371	1476436	1381141	1545529	1562939	1472591	1458936	1477389	1379235	1338474
82517	80391	46519	30872	35278	34271	33635	21872	17549	24871	34122	30581	28533	84778	44018	52794	60568	91530	76271	88976	49941	84692	69258	92404	93436	108363	132612	134072	173976	181133	204761	212020	213910	206756	208718	218762	207512	225917	207192	221300	201815	250465	258173	249153	239343	244665	323401	286686	349263	343953
417645	416072	438961	488923	524511	490471	519794	517305	500855	483499	483251	480156	492488	520443	528920	513440	525550	563389	512510	510424	632703	521511	654763	589817	612446	543726	551725	551908	568977	579659	586685	633804	609603	589503	605369	561408	642684	673550	636562	598483	572088	623663	609563	613206	626518	619005	603325	592825	661195	647644
105624	95543	113578	126227	138321	173091	165061	201117	187234	264798	180751	254595	332291	303653	319193	299682	328544	322459	326994	374104	296649	329588	380508	388828	353591	344412	367688	396288	401428	359074	370401	407878	405330	329454	312550	327153	364042	346126	404487	414314	402106	418606	338289	382388	474224	497841	482941	483852	430062	423206
658	700	768	5671	1047	907	732	7327	67043	87165	101754	35431	966	96210	4739	51769	153081	170835	165497	164885	168990	182590	190348	192933	187263	195818	196962	202326	198511	190134	199156	171739	205134	188316	187009	195385	194441	233722	188675	195832	228950	200542	186658	198166	199826	185277	175077	182488	182527	191306
110570	100920	186444	305379	23595	221960	323310	364528	362114	347283	348587	313857	275035	254446	277011	341255	307641	345055	301775	358972	245731	182055	380421	383860	562829	464481	562370	595807	563132	664107	589692	641931	599133	610132	634899	632554	559423	622952	638442	642953	690425	683484	662188	669352	705280	685179	673048	669682	727867	661759
15938	15681	14345	15413	93361	118967	97949	108714	109117	115645	111030	111790	113458	109932	117273	118424	115650	114708	121246	139285	127091	124307	119902	124652	122094	119505	113268	110173	104453	106749	109936	107815	104548	104575	105097	105224	102073	106552	114607	100348	99179	83253	74632	80968	82191	85139	85722	85513	86147	87534
280087	299041	303818	273521	253064	282641	246442	289136	227288	229910	234725	214510	195860	239582	208265	363621	325553	297348	319964	347406	341259	346312	347056	343224	334133	360554	348238	364620	376477	368352	406166	397469	443649	415939	387638	411259	419375	572446	639961	645961	564899	631772	606929	600735	602406	617666	652912	660690	691567	676392
139084	137523	145747	164608	167615	178899	177560	202012	224625	235674	216280	215844	214685	251979	344030	335939	237253	226680	224231	204953	345742	283983	220170	277627	307424	335863	355912	382258	393469	317237	342850	320672	322440	371183	322958	356111	371979	367247	369237	317570	308121	322943	313147	362377	362196	533850	493216	549420	525924	561614
6575	14205	46175	23755	42554	158279	17793	19772	19695	17675	19644	20978	21308	17826	17099	17299	18805	20598	21540	20275	16911	21585	19175	20157	17745	18663	20687	94549	123141	15230	21728	19413	21911	20501	20586	21740	23350	19865	20824	15669	24078	24938	19285	20866	21341	21480	22251	20776	22679	33599
1284	7880	74699	55352	82040	87383	70067	61029	156870	228942	163933	159732	177389	185280	191354	183707	168696	163995	296296	191668	229974	217355	293482	238300	249011	203988	228168	209859	231923	227023	217090	249355	279487	263155	234638	243727	283495	229995	214259	205631	208300	222079	254433	228481	209225	188005	232701	220438	252636	213948
3187	88238	81331	68450	79714	68171	84483	46061	42485	34476	89558	64171	66133	48068	54489	68987	84525	72307	73438	83514	99634	89020	97055	103833	119938	101453	130025	117004	80680	81183	94772	89304	88007	99117	101469	94911	82334	136280	131034	130853	154725	153710	154990	187544	172920	155630	159180	47964	86360	146111
36470	15547	80411	35404	31091	34393	31575	34834	66996	49806	41974	37893	42093	37608	72423	60048	23911	50109	37583	65138	37924	34774	38377	36825	79467	34575	37553	23421	28962	29775	30774	43248	37423	55034	37971	38764	63880	27110	16900	93449	103806	183918	178797	73067	196638	35191	27802	25631	24179	22272
14155	201677	283753	331837	348539	349609	361549	341008	340502	388142	408512	394349	374744	361591	403146	426650	446738	432052	514603	501999	481586	577024	583789	619875	641023	663441	721402	740317	756520	776010	809722	819423	820713	804997	820374	815792	859273	834261	931173	930695	940225	1090698	1120063	1258648	1359025	1434053	1452302	1348918	1400337	1539926
81159	134442	147168	245802	135197	120443	113366	106234	83224	85836	90179	77129	81477	113814	128798	109565	153854	144152	129325	130621	131445	109169	125557	137849	126569	181017	147058	145050	103990	138335	156952	136429	139185	161507	141236	127559	136021	181785	228264	218026	219754	208161	188011	221837	237854	188315	163406	204242	155894	186994
118	198	400	446	635	6215	9807	19786	15530	20704	36537	49697	53849	17670	24376	24339	46316	63261	57543	45212	122771	120753	135796	143551	144051	151007	187380	160917	155117	180527	160430	151784	165008	151591	154038	182534	151882	166488	165900	174792	173561	163441	153980	181448	175393	183660	187633	170565	209924	174997
932	12630	32353	47630	58464	38814	52055	60788	63712	56661	55788	46217	47530	53491	76410	82082	112709	92289	79142	82224	68849	75882	106705	71587	74054	61836	100301	83405	81069	82569	93733	91883	93201	85521	90934	102398	94786	88923	87667	86790	122296	111111	110388	96934	126994	91034	248569	241921	97602	111355
75333	63260	64708	206609	173176	98420	231360	167350	110171	126856	140167	152220	127046	144416	254720	251270	318037	305959	407612	341968	363901	321112	279020	281992	338827	321782	336356	271799	332917	307131	284657	336184	281950	356173	490659	399685	436929	380757	420904	430975	347999	348374	377068	335772	379343	303740	333377	310520	230612	305702
87	103	1848	4460	2419	506	492	859	742	437	38475	2023	1841	17519	2053	1584	19605	5321	41676	5628	5620	40087	5699	7291	20555	7068	6635	6224	52081	5702	16717	6206	17824	5944	31831	18811	23724	51524	16267	16119	11586	19128	20277	8819	7488	7558	40218	24010	33053	17926
22635	22704	44034	17179	22598	42476	38174	48575	46378	49502	45558	56372	45019	56247	64825	32802	59286	55146	13045	50308	31708	49366	53347	50102	88025	137593	135633	112736	147683	139267	131573	109747	119601	147820	150763	151359	145669	136160	133397	165178	172034	167205	175734	184457	224331	172418	188271	217164	176413	181444
3269	22842	26123	21381	149817	55214	54172	40765	83799	47266	83109	34789	150571	154210	160700	150618	104935	102487	125274	106814	119883	144752	115459	139757	125553	149090	188878	153811	125905	168685	130604	156604	166547	143118	151007	123054	147172	151861	188847	133036	201745	156359	190251	163890	180252	168282	186533	220034	169093	198419
26763	7206	78907	187588	1869	29227	85083	295252	334175	275950	326529	303058	298447	281543	93572	39136	31756	62597	189588	291282	333391	467906	478360	486119	554436	606420	588042	587245	623734	580382	463345	195766	210567	172467	276686	316772	228773	224686	320366	315255	342406	394732	415905	431990	483437	486008	451112	442886	456523	458230
774	13267	7075	117998	43061	20353	49258	97681	78229	65287	86322	71843	80985	80455	128813	168054	139979	160475	111777	163170	178710	163105	233759	271403	195719	250985	227863	191531	267239	290821	521635	618848	475861	568593	292047	504230	375557	337378	217864	216787	246968	212603	239937	236795	250569	301740	377265	559322	400868	292117
25384	36409	140210	4176	2334	12615	138712	154405	100046	131059	136607	83585	143166	121070	120545	88549	132183	120202	176066	142643	140829	124845	160873	164338	159574	186984	304351	206932	150734	176022	186502	197410	138431	201892	195316	180710	166653	184058	223281	268182	285040	369334	302784	316743	312724	328497	335825	322834	391065	416663
8	39067	104	37	26652	36777	28402	41797	38849	50022	77580	54642	78768	132354	53546	75370	100997	78949	137871	166776	188071	151040	158954	116598	203484	103814	190797	235900	340561	309871	328642	336582	405628	358105	409257	428481	439476	447755	403080	408364	441341	409237	417919	457314	490133	517545	456466	482962	490894	538356
68195	67046	80558	116878	97931	109372	175000	126921	132908	119403	131987	172433	154670	174072	167819	156065	184355	194413	136104	156869	170794	165131	261316	240373	239154	279415	370446	481998	560123	393480	517831	402076	378652	655933	926866	762944	792575	641587	554209	495587	453519	411447	387833	414699	409745	439190	529396	520651	576222	688529
12986	9216	67790	39056	35608	37687	52056	29194	98690	72034	97389	44046	69595	119725	48494	46339	65428	84492	91556	67406	212319	34994	73725	85499	80689	102971	64141	92711	81108	68938	71124	63988	112569	128594	160132	162065	162568	190580	148273	134238	150960	126705	122507	132695	164227	199110	173251	171061	174721	166710
14352	77	402	6889	1434	1371	11487	5551	6073	5970	6284	5618	64917	15317	64223	56718	76240	57957	103485	59784	87745	74365	64219	48369	54004	67727	126011	65251	87636	82237	157728	145620	159305	46450	40900	115247	76231	13407	10621	38876	127211	98595	94643	219388	230486	279658	307001	338630	296435	287697
31041	17	143	16281	12072	44357	103438	126351	133571	78700	56996	149561	107842	154732	173094	222579	191102	228086	230632	267571	229018	169470	142317	160734	211538	170925	304748	294043	285862	278175	311667	352800	415396	544409	463912	492843	528985	697004	684499	574867	555625	539229	673161	655281	660092	656394	367847	333712	308762	423861
3416	4787	6117	76453	98165	116185	91999	88475	88027	73117	57999	160951	75822	106765	99849	66056	49230	195528	127772	159785	173036	186579	193902	235889	236373	275464	410719	455751	429801	412090	399980	491442	401914	496590	540237	403404	569253	490197	516757	544013	547369	545339	594982	585599	575694	641476	600627	571333	649057	577562
1881	1005	548	2696	2070	3887	1388	82583	1982	18799	3603	3989	864	11443	97227	10613	32343	23427	346	690	5297	18475	41357	5783	968	695	684	566	1891	344	13108	12199	19804	9587	1706	3721	1554	63616	4881	1072	38321	1976	84952	4044	1414	2312	2268	2142	6127	2524
28569	7700	82355	181718	341800	391230	273861	214979	227889	47374	149782	290449	31991	53159	3413	111260	24498	13144	26118	78725	139	116245	47099	98259	20093	27658	59917	34877	26866	43444	20214	50368	129780	250600	308853	312496	378400	370908	345186	393056	377154	373606	392463	327876	360178	421479	486079	409780	429537	497177
415	145	99	30611	146	5443	6180	2827	479	4516	497	561	553	315	4091	353	12781	299	594	480	31584	21114	124430	923	2262	28167	5027	99	25836	154	215	51920	223	884	236	7058	236	123806	134152	134108	144347	136995	171402	145076	142403	146329	143829	142413	128897	165940
1052	14258	2164	782	18041	3235	1064	16109	10758	1097	947	1077	1018	961	9676	918	1250	14782	1234	37133	7241	1300	4731	1276	9479	1296	13582	1804	7803	814	17213	4629	1477	10851	7687	14921	3120	884	877	743	2865	1026	792	806	1968	1016	2671	1572	729	4540
26	9	27	54621	54972	61209	71182	72865	84084	92206	92377	74003	93995	95654	104683	88559	130162	160868	142747	180593	154124	116741	34399	85807	134966	113548	152910	141918	158875	180224	200333	196171	284971	311472	335270	310575	323887	318600	345681	332085	348512	366985	314382	320111	314900	302511	306796	306060	337496	312648
1709	9833	1145	7343	42894	15353	33586	15259	1024	2571	4754	8864	10468	27822	11269	6716	14955	10233	3260	11626	63766	36015	23370	30410	30513	24496	39895	42421	77971	51759	45607	45721	68482	84545	101298	84268	83207	80159	98461	117215	66940	86324	106861	86715	74649	54231	60547	61054	58266	67925
2929	288	264	292	716	11639	12610	3427	28019	38001	18359	11298	91381	6703	23723	240	6502	7254	48252	29765	48944	42036	16096	44450	78064	400	15945	2870	46599	120530	2285	118441	178027	60018	103072	19058	69720	55734	58200	33345	79128	34397	116135	706	60385	93601	77899	170404	110400	225313
2216	2457	1324	1098	26038	70610	141714	82199	80201	76571	53558	37396	32165	54061	92552	90267	60563	59038	41513	68485	88707	190450	190600	50280	107642	48929	42232	143757	258922	147073	161356	281579	364080	415291	372924	392649	307003	365614	520197	476514	517397	513893	528199	530168	460821	549602	646937	627705	604952	591822
63166	57048	56158	21212	78519	105331	76469	68952	109456	108064	77412	88782	144956	105724	87886	166987	278848	164899	136368	112951	200090	134044	105041	145201	61926	137490	143447	144128	120471	112132	169661	124155	138506	96770	107066	163200	204822	227910	243218	318588	266877	233323	336401	300345	305825	285574	291705	314777	248471	311033
41679	20502	6853	276927	16038	40369	58391	60898	125812	121653	102424	155973	193633	201462	236460	255779	252328	311587	304625	363303	358965	569682	381222	347114	290289	315267	285137	215507	246401	281990	436363	583245	592817	495712	647031	695948	852092	973296	922862	957390	928266	805582	751394	739972	766418	885059	1091364	1198353	1129412	1261193
8172	1765	9292	3655	15725	2024	83627	62435	98820	158281	143871	203690	254915	231498	195242	194815	116835	24288	35644	54865	139941	118674	156967	204901	327668	370431	292091	376857	348123	390784	584098	567922	493272	548461	500944	444831	500099	536977	504448	539258	605841	701984	562656	560176	615513	662763	679813	735842	835570	1039550
3657	3466	140	90131	1284	80485	100948	288764	170449	176701	703777	401554	177379	299670	907894	997521	163606	33800	52606	245111	598696	347678	258361	44594	814558	1154997	1808564	1730195	1642745	1798604	1759553	2047431	2257653	2110415	1132794	1323011	2444752	806082	724622	420074	1306007	1852064	2152857	2346750	2205362	1719631	1840012	1984670	2043404	2078928
198309	204723	211448	286952	233096	81571	225997	309529	122711	470536	371340	388593	388868	433619	545661	534933	612459	535966	631126	558148	613213	733612	658468	560379	552856	691302	775002	832564	745538	903110	1081238	1007494	1053259	1075861	1196898	1069119	1076642	1123490	1076141	1212838	1093841	1238696	1215358	1284033	1329070	1355461	1371400	1360183	1194322	1260134
120190	111142	143841	124821	159205	282798	294563	303520	346267	361752	371700	298357	259943	234792	358027	383640	147128	140572	190328	239981	360177	624087	631569	629761	747247	703459	784435	794115	777754	813770	871930	862211	976158	1005865	977086	1030797	1191476	1159556	1067453	1110882	730341	721462	645119	659221	681781	719596	728472	782524	765322	852941
13	32222	21	6	17825	22484	23879	45327	26289	44610	67390	63977	84216	122387	36823	57318	83667	69009	124903	130032	212869	135483	195299	88329	135416	32207	47884	126999	241480	268861	279717	283233	311509	275460	294433	336033	351558	351534	340815	334670	358270	334782	339788	376411	434775	448168	379503	408120	397544	414808
238	13298	142559	344	4037	20097	151095	160818	102775	77907	146334	86303	156855	57256	49282	76765	172984	220214	91272	86621	59747	63307	48481	47946	55231	84903	203100	104957	73577	112896	170282	140168	117274	303680	237840	252972	228189	241846	289770	356984	394471	457654	423936	405374	372296	414538	418774	412475	477735	481932
108	169	152	284	2700	1403	375	26898	337	9012	14869	34422	11923	1243	14639	170	5393	36155	1822	1160	44605	2078	173	1677	602	46736	22230	159	1583	37453	223	37849	29986	2869	1441	51407	38738	58986	132301	69151	127901	214577	207513	131915	184163	247681	146594	203171	253027	113874
416	4804	1960	171	976	332	462	275	54695	28	61	161	54	36443	153	47854	354	3619	293	447	5851	1649	390	12663	301	2676	365	8736	144188	45744	6217	20504	25368	43779	2265	37429	9781	10126	24961	437	211	6053	19186	20119	2276	12153	422	31945	30687	261008
14327	44361	13717	50629	86249	36616	39492	41295	50490	55502	62276	67498	64443	90906	75807	75746	71258	81516	69176	72299	80009	85788	118750	103242	96415	109079	113295	125712	117447	112960	116078	116814	88336	94348	85131	88827	90648	94054	102064	102951	96457	98245	105118	108775	102297	99993	126623	113708	107476	123221
719	1465	536	691	31468	3065	37597	6921	36897	62393	146369	67508	6793	96894	40706	41870	54214	48699	161984	87583	30528	17707	37946	100981	72802	143316	131719	256136	276773	309215	299234	278616	262513	272644	266350	282724	268725	297503	298319	306851	32467	66597	57489	79583	45423	66614	187379	241811	186507	132870
2718	11211	1486	158907	813	2338	2100	2052	1708	71736	16512	2013	109028	1701	1437	3019	1764	1589	2319	3064	1234	1292	790	13643	28625	1011	10093	1261	9296	41506	99735	503	932	789	939	56927	1909	1872	6598	12541	1681	111487	132763	119802	136418	110630	125675	123100	111862	112879
38946	57277	13114	22046	41414	56994	58555	45994	162850	148886	172523	192426	293384	272854	326832	412935	398325	604577	800990	636304	534388	522549	550874	564557	728602	621387	967649	957911	888215	672571	838329	767602	858783	1019935	989841	1182537	1125763	1100712	1441462	1457049	707198	337022	660104	1203020	1850847	1512678	1694596	1744399	1804636	2051845
250	267	183	5346	97	150	218	299	85798	65594	60458	115135	67956	83064	80198	35692	100367	78042	67359	68248	84556	35306	91045	74313	101155	131188	166106	184450	233135	205117	200201	274371	215804	236413	245295	216552	230231	257381	283143	123423	139008	190866	164422	190535	178997	208748	229352	214690	207475	214196
23170	13509	11574	9970	11289	20883	10992	12648	13241	11739	12460	13190	55627	35391	38886	30448	58655	61602	75318	101183	109129	131864	175938	162115	150749	166712	220255	288019	303935	340483	375335	235697	272744	315382	332847	349102	432932	408654	463895	445629	522309	441391	481830	501459	537945	550102	598259	593830	615645	632103
680	25219	77610	111912	133624	117993	136772	252770	234930	242430	235373	130832	254239	317299	385791	392417	372802	525827	393315	405076	444079	501485	560358	600167	491334	517668	502176	531892	625119	556087	586030	547377	552556	583828	729151	665423	703942	733697	792919	822351	793818	795979	751686	746512	725861	694149	698844	706841	683426	715473
7490	15720	25261	68673	62162	88204	63982	1901	49345	43316	43138	43051	73709	39632	105537	246417	186796	157672	227813	218000	138331	130597	168879	91276	170280	254609	208605	106213	166418	237687	319455	409591	493711	298259	481101	792226	385325	542532	372342	620760	453061	764435	689399	832489	915058	958112	1051672	1119308	1124925	1222004
14528	16247	17246	48613	60882	64331	85567	66769	62121	62093	53087	53239	48937	40428	62561	99290	74040	73568	55189	81071	106237	117492	134444	175086	97985	243937	230893	115629	120333	124536	115501	118946	137696	190592	182637	160306	218622	253395	279845	284977	259676	307867	310076	367721	433463	425175	410035	471760	480187	654481
236	36055	31301	33356	41130	43777	55945	50543	65665	47107	33431	39721	56262	34679	37705	40499	38495	57902	35270	61213	47928	6583	31501	47679	38786	35705	43339	117600	63357	76008	70890	74519	87126	128327	118605	134712	154584	134682	146656	149813	154438	150014	216886	173242	175987	168292	170944	147840	171782	174835
31778	15004	4618	17157	6703	40633	43083	60139	47979	50185	49799	44749	76636	39855	53090	65636	99755	64438	24940	34332	33036	41251	59901	63645	55748	69092	50071	120304	75053	88216	92624	111355	190855	124805	178668	188447	239288	231144	276148	232894	221791	195192	260320	252450	244894	304913	301850	237039	344589	532813
47	12442	14583	6298	22220	71294	97140	125730	133515	68252	48906	49248	41883	57545	78454	49522	73767	75255	96653	113039	82849	94898	129454	166705	95304	104013	120116	91370	102788	97927	152326	194843	183674	197659	216451	214969	338159	321334	273929	255333	305799	279772	264535	297781	268352	282568	279670	316474	346214	340025
129759	65419	66661	123345	255574	258423	320501	250481	355822	325871	383804	444523	437907	526711	476644	550876	705581	685420	663410	695714	637216	447151	524764	531430	665457	688140	724128	831464	842305	877888	992769	920694	947765	930585	940940	967686	1022071	1174761	1191910	1180952	1171235	1174216	1043041	965737	960676	993679	1054977	1074668	1101742	1136401
1027	9118	9101	37092	70026	80852	62301	56835	70562	154439	263416	244076	239790	246730	256033	225071	244657	149914	172672	213134	299518	284261	396651	378850	373716	403889	457367	582954	651892	654604	628190	680105	675177	740946	805977	852204	820157	915404	909203	913587	902821	927467	955429	939389	1016545	1101501	1040658	1108645	1109416	1135606
8071	6395	3334	22808	20583	32775	31903	70074	44111	13473	82670	72208	107725	73474	107166	146383	163514	173464	211401	193518	201809	242435	200184	320924	318268	365791	336352	248988	85735	100295	30498	33686	16303	8907	50542	58159	57607	76272	83690	115571	64742	346985	288079	347773	312165	278521	264634	340854	366634	303069
566	670	31052	7695	17058	27142	11036	29014	44844	49284	49667	50160	29677	29701	33546	42815	27315	16989	16132	28277	26541	37568	72594	47904	14507	3359	49597	12947	3942	37120	20179	27174	12561	39698	35735	30322	29090	61253	84593	85639	111890	117830	102816	95770	191568	233198	217920	143475	59428	71158
4963	29759	33597	28891	41582	40853	25309	11130	19178	39010	48216	23697	49435	54226	67098	57113	59865	73180	60001	59700	74614	95599	83523	84213	112365	94603	125647	128005	161426	158743	161160	322505	245093	352277	423396	477761	510093	453660	550441	561227	513467	372963	311723	283023	155598	178196	155846	123685	181690	230417
495	55	119	237	47410	12611	18171	15455	11491	14185	43565	66727	57050	80162	94970	94629	148420	185669	105391	74848	141185	76487	125429	89965	95114	62576	56312	59575	63976	100488	119196	109330	81473	89138	114835	79167	97514	109526	113654	115907	119222	113516	114766	115168	115744	114227	115056	118739	116218	114133
31	45	1249	24695	151848	168565	125726	252458	297926	288471	214606	233998	272862	341908	308986	337804	277651	317943	368674	528253	353802	352138	410890	487316	491723	183699	129750	127156	149570	215296	206810	283118	372435	675615	739150	830177	811186	809059	763894	834632	846991	905575	862209	834065	922328	960729	933790	969647	1017271	805724
58	80	64	88	21352	119	152	42657	48384	49999	39874	53044	11256	8231	10771	10931	34107	41444	40852	41106	51774	48925	48786	48809	81241	70908	43434	42698	41405	43952	38970	42463	42963	53290	170461	145365	42624	67612	82453	51944	55576	79559	76780	71939	147757	77342	77569	114135	80437	110349
7841	5691	21505	23438	39478	58731	71805	71855	56673	28179	7531	64562	56610	78420	65650	84186	161750	74276	73401	127588	209889	235383	229069	174094	229473	278730	296853	370516	436077	418177	487195	488060	520459	585865	561637	556774	691221	698392	703286	715795	728093	764769	771511	806515	952932	882718	831950	847308	875486	859403
29688	41199	45105	41711	50335	48957	85097	78216	78947	89296	117610	124246	134942	134672	150855	137134	132952	153232	144999	126305	150183	103773	115208	120419	111403	140301	132194	112714	127273	112087	143113	147356	176312	170891	173196	167381	143589	74769	80203	37913	74085	120288	129179	95631	125045	124841	137317	110344	145860	102737
11202	29912	25711	30234	30042	40121	50424	68456	32753	68102	81661	98995	93096	92517	70463	58646	81063	86728	89755	86886	61723	67159	66342	85202	66650	65917	86040	79096	84432	83784	71025	71855	77326	77370	50241	71129	61694	63517	71977	90869	105266	128017	103305	81516	88351	79353	82611	86821	79994	74324
22340	18150	19510	34210	25134	21510	71129	38872	54610	71771	66114	73195	56065	89102	70921	50258	86493	121995	148823	266585	294188	324133	371566	454187	514895	677664	424416	421016	350257	283072	172027	190333	269289	236939	159051	180676	210096	358875	543155	611679	619997	676986	755087	700643	707782	806028	715943	574721	564188	594184
33457	14705	23357	22635	53914	96108	99595	74747	101267	124993	127756	114513	100250	150482	169448	165242	165208	170053	164388	171357	361039	418178	642382	469231	556109	620443	694618	339239	414970	374650	417920	633351	634392	493513	580402	664127	789372	695763	751696	662650	758654	738356	620875	652945	704873	557045	478495	432235	367436	325990
230	246	241	361	6404	276	4243	5441	3711	421	6183	550	395	640	1804	12713	10401	32311	650	23793	5455	5503	32894	43124	38341	55525	63162	45036	111101	183136	267758	160460	145672	155224	154209	153793	200351	161197	161137	129242	133834	143510	201433	277513	501099	446001	572528	530911	591817	557116
102380	102479	141954	148925	183457	187121	201267	199108	202153	200761	206855	228022	225495	273664	292503	175121	241701	394099	388849	332193	309291	367337	351687	386002	425060	410795	388177	388090	393472	359297	374983	412982	411232	356962	312976	366831	331280	296366	305000	301604	319250	330456	329004	360364	311257	331905	346932	359162	345976	360058
67645	43506	13529	18169	20547	89524	151483	125790	164881	171251	221585	156204	135822	140991	114835	74473	162187	431258	245090	403703	499383	474454	448335	438976	519769	285202	276072	249144	352811	529242	544162	519090	634420	557842	628603	475311	448420	433414	487660	439682	418724	429592	396728	425405	390918	415016	465649	508353	490703	441931
23818	20050	108	1343	27690	5375	9008	11148	136130	13787	18196	12183	30331	51486	133142	102499	98638	92942	70150	60884	73155	73064	107985	35918	51725	137078	117897	119114	115695	117717	176553	145030	210268	203494	177841	166902	198882	159626	223223	249242	149298	303902	240352	244893	289579	220080	249631	312742	315919	316238
36269	25530	23426	53253	55676	89970	107992	129731	130693	133177	195454	202956	191741	216003	239247	197806	293811	240256	334241	264308	349990	426107	369128	399190	466767	632572	657836	653299	633614	627062	714851	917818	1114282	1065657	1002950	1130807	1125155	979699	1156320	1074526	1341013	1403178	1724956	1625022	1637411	1715577	1763143	1906408	2065189	1994175
214	181	45143	1414	7455	9251	13112	23442	29670	29698	47693	43481	22341	73941	16814	11322	35851	48483	40594	4083	39148	76040	60374	74750	65446	88453	90319	85375	91661	85729	98220	97864	83481	85127	88992	76086	78563	79712	64541	58645	72685	82404	64669	51674	117853	60961	54336	52668	50487	85206
25583	795	2562	17408	16051	17793	16521	13710	19034	5355	5871	322	27130	2330	113	884	59996	61113	46620	19958	6809	32677	50930	50542	52138	22392	26261	33879	47963	7933	36006	89174	97388	85422	76721	120879	157187	176612	114942	94911	144834	147008	108639	94769	70612	114331	102983	83227	37917	36989
11303	18178	13540	44359	15524	120454	167902	155237	116334	142344	153399	87502	21205	49098	44762	58782	153601	161196	176577	141774	155823	183031	73058	5332	7590	18403	42329	14187	61857	64137	114700	228348	225723	182751	138016	165339	316534	283339	431255	366983	490880	431301	456528	458818	532285	520816	601275	563553	594603	557828
758	951	14573	1726	1821	40695	269	7010	387	21924	96788	121255	55328	132251	150930	144888	147991	27568	14983	48602	27739	1716	1523	31622	13050	8882	248	2041	488	201	448	45208	56807	84693	77828	59974	40594	68217	46421	195850	48036	107040	101888	146569	85868	98947	97133	90099	89044	110345
24882	129	174	536	2413	7610	6770	8225	73164	107848	193496	197251	121554	161297	164704	89584	173717	174949	153323	167674	165089	184162	285495	308005	283878	441053	499147	374932	511270	340461	496401	561849	575019	538904	582577	597988	642597	515844	348151	357066	349570	350291	365712	430977	554224	534552	592980	767397	887118	860800
17623	22877	14356	21841	19664	13527	15774	17140	40223	40457	14011	13743	16898	14352	12638	24867	26632	25627	21828	10566	24004	13931	3493	1406	57921	66566	33623	85993	107862	144853	241266	222364	258540	215420	260474	307957	334181	374720	402216	405393	408864	424256	452688	567865	424871	463533	503787	685676	645580	702141
14594	24104	31596	119305	157433	157612	206790	166763	136106	81049	50579	132684	60633	161520	140992	110820	62425	42883	123552	173773	209176	226260	250388	279799	283909	269548	276904	337957	253672	305787	442437	321924	328996	284732	340128	367017	455281	558399	657448	694204	624065	658302	731365	546480	388606	425453	366571	408738	570439	539573
48389	45493	56429	113227	49224	52803	54403	299954	163436	166313	213792	196719	245030	247241	330901	306882	315720	302592	302467	284699	278694	304837	310429	324751	459807	304153	289000	316158	356149	285067	296617	296601	322464	307440	365786	299711	311449	307034	371098	478382	370362	364654	314177	368698	321485	338165	315433	356659	386276	414414
1032	375	4941	38846	17847	46556	40928	14394	82939	15711	43302	147016	48607	139984	91952	146537	114966	147378	174864	98722	105634	263741	123121	131712	127403	102086	116407	114602	153807	198710	181993	288001	193662	311234	328645	453131	426842	539049	269510	252855	236800	176379	274973	279400	277381	270316	333543	295983	339809	286305
1689	12327	9461	34162	56769	43086	63791	56926	48209	51212	53782	33746	25371	51761	63903	70869	72782	46835	17150	69939	62971	49549	50876	25880	19959	49356	40953	45442	70507	106764	157174	128606	122153	119039	183504	249122	216966	191087	182405	187177	207452	207469	199404	228862	313817	242746	208386	214229	205215	211689
98734	11439	2565	2284	2118	2792	3438	2735	2865	3690	6427	3043	2438	2812	33019	53165	52326	44575	70248	24239	87811	43479	67897	50996	53764	130762	56584	54875	55674	76032	78968	54030	61597	116333	109965	60451	53819	60000	52339	60726	54054	81265	59217	71484	61523	84911	87366	109888	59356	57194
18063	6030	933	1617	597	3048	428	17365	623	1491	479	68316	471	401	1410	808	3345	60989	16591	494	1311	360	522	753	3337	24190	19062	9522	2035	2500	5379	4487	3232	4528	59630	26970	5700	29661	37062	32473	15691	26029	13285	79859	93613	37138	5361	3641	5558	106695
15814	54219	43450	68091	46525	23579	18180	23235	25134	29987	28491	48946	213737	267363	227398	165526	81078	49874	61846	67743	73029	67934	49421	44883	67442	84920	82725	106219	129292	249796	387147	453562	380583	284416	173953	158301	230772	138278	139515	137503	160272	161299	127523	227049	193370	121981	202734	250537	144936	348669
372	5187	2715	2697	1549	17536	10717	56952	51949	38528	34295	28633	52722	33112	41267	8422	20855	55941	70736	107812	29655	45369	26421	28282	42718	72550	42251	89855	76001	93573	82048	62171	66930	82570	89768	143449	152252	96791	105608	126301	142895	153398	148284	245296	210957	189402	150253	151576	157019	198615
30701	28809	46199	84743	121757	105347	114260	161392	154960	176514	169564	219442	319879	247708	378282	340065	298069	352306	300875	368581	401261	101637	322832	315200	317846	486306	376553	589318	467876	707297	627528	588362	605385	570795	186838	362251	484821	446575	455481	1267864	1260694	1331144	1336653	913917	1004107	656144	141318	251520	126938	257767
163	17749	11437	44139	82	153	126548	5951	918	1784	3912	3285	5299	4518	4353	19486	360	45855	34434	306	2127	2311	21399	14675	4599	4252	3276	8657	4386	7502	8114	19278	42748	12990	5685	15284	17284	38961	39412	12893	39172	4407	13928	17088	5548	6131	8725	8541	16421	16553
249138	205835	98545	123451	4810	129341	111968	29875	246602	138082	258404	314751	356064	327950	434902	154760	12893	25768	39363	175015	353377	392496	625430	605317	679360	663441	1081214	939183	893324	1029015	855692	1082548	1125149	1206561	1165893	1205049	1081466	1055860	1108862	950988	1116208	693740	690063	661773	887318	1169006	553127	917975	1125655	832116
6338	2931	2981	4788	4704	1666	37780	27268	2647	2915	6241	17744	9984	1564	4572	21128	13391	18568	47726	48267	50880	54752	55152	15986	32217	36122	33494	14609	15030	27987	24493	16734	16702	19492	26919	15791	17084	24503	22508	20476	23232	23561	45512	47612	65514	46427	51906	40114	42292	36923
1480	2174	3014	18701	20923	1614	893	1191	13400	1333	6097	22691	138929	11589	22720	43238	43803	83251	44046	33347	277699	53662	76936	215552	170039	206222	137755	175457	212102	136064	4194	127506	92552	47756	68863	34863	71628	60836	10149	74004	1508	64141	23557	10974	8503	3672	41209	8583	1810	5211
9691	30574	70515	80832	76709	68562	150695	169953	165916	190845	190078	204724	202723	203391	353036	72308	111305	65862	100971	169344	316259	291689	456588	479874	492718	268251	233184	328127	279172	520212	485458	555991	527175	699935	694986	721195	699146	668091	778453	699602	695818	550487	625975	630957	523629	606190	543810	591604	569853	594791
132108	135168	135693	129092	134131	123559	205182	219913	177970	165074	177051	158276	154988	180473	218424	142089	93780	147628	143762	150093	199057	195402	254360	252854	313460	344892	295906	379978	362725	426896	464837	439221	391883	531084	340825	315336	286634	333640	356815	413357	522605	380145	507583	563744	671190	548679	627250	708702	666656	772874
94165	31897	554	47507	199631	467068	579111	630774	655946	559517	625524	473097	633379	553918	746142	802540	641513	765444	743517	710303	800270	676587	562965	611422	775725	440840	523388	664030	784317	731026	703977	798141	973426	985792	971909	1013395	1137683	845303	919011	886268	938505	1153124	962835	762941	1221971	1189856	986680	1250291	1161392	1316838
6593	20966	19037	14525	19959	39976	41703	117093	132066	140114	142280	150810	222868	231059	309236	400902	326100	386627	455786	308541	269148	158399	133852	141801	160164	83507	43199	62351	79967	131767	135456	141575	187002	161094	186220	198657	208518	258935	276667	286918	227640	267635	232404	213754	242911	272095	218058	252557	216719	318890
20722	18439	15298	11757	95509	87680	119058	203589	317057	431819	457374	418240	440724	413890	448924	433231	31788	15493	125926	4544	5176	4052	2277	4912	54903	70501	149985	171975	292363	136219	113365	114157	115479	157272	119360	164477	180608	169451	224621	262213	275520	186260	248077	273681	337414	214164	241432	355227	228592	296985
84992	25819	9702	30438	66314	25814	5489	53173	203036	230790	186751	81131	62468	84221	298545	335908	298777	383665	399465	479893	420326	409764	185201	202027	155170	121314	140332	225461	278515	422296	438019	374025	451650	326905	68601	291	282944	430937	332854	335224	319583	441796	399337	458308	497901	507542	485263	371311	495124	520334
355837	342877	336691	371256	340453	338349	342907	339323	92503	85653	90798	259690	106298	63660	166136	191247	175900	320393	6612	5708	34736	175978	235072	186464	147137	207135	357539	336033	375931	421722	387152	282807	388271	437972	426396	216524	110311	171556	120999	251122	343457	522474	314973	332987	404732	457813	490349	474056	505493	491136
6647	1573	1371	2521	3924	3376	2515	3188	23291	2536	1836	2006	3094	1899	2753	2514	53706	1766	755	886	966	779	969	1085	1403	1316	29882	1754	1839	2265	2411	2235	2707	2448	4319	6976	11273	2822	2743	3106	10040	3896	3468	3184	3679	3708	15311	6176	3992	24488
126	8224	3500	2601	113430	226	312	520	541	11615	6988	3964	6076	1749	12421	24961	176427	135726	48375	101569	63900	60023	76939	79669	73193	96336	81951	106018	128956	203682	168956	150133	241875	221195	251353	209226	336861	329194	276484	245621	435495	314744	248254	403584	286083	447117	413960	498647	541880	587529
102914	85624	78873	78358	94884	77289	82304	88450	109018	96066	98282	112309	15169	619	21931	1766	1820	1046	628	18123	30972	918	8872	10276	80176	1451	21232	4361	927	925	1850	16067	89057	46904	43380	35694	33175	32578	25495	20729	16623	38680	49736	51103	57249	56593	103820	130178	143447	114725
1052	1058	1858	2455	2901	1890	2898	5316	3949	4100	5320	8433	4351	4453	4863	7850	16848	29359	32877	7951	12886	8661	10137	9693	28950	67765	87488	89079	59086	56741	74985	70592	98694	94741	151509	177846	192716	181096	232115	226060	311923	328987	360795	400251	450377	460649	446719	514789	522438	430730
56686	47844	50853	50765	50809	49694	53773	66278	92937	184908	93064	178741	191223	173159	198572	165304	118338	157998	149417	173960	192083	144784	168306	12459	21750	18158	63906	79283	86972	133956	158533	192926	428123	451041	464123	376960	393677	485280	534689	532238	510667	443808	329877	311658	339309	339590	330739	330770	350352	344827
3660	1571	21601	10022	14451	81435	138724	82825	95959	36702	118935	71317	15629	32699	112669	121098	167796	259676	257324	250965	238311	145796	84187	131727	114551	113936	90467	108959	142013	134104	114078	107712	83025	107004	94776	98047	116704	83080	86167	117994	94437	75506	81641	88433	75883	97602	118522	90989	77351	92148
35275	70140	104680	97154	124671	118838	140308	182619	153629	170663	144899	167366	245460	251125	242317	184405	187245	186313	136360	172822	137844	57068	200020	204401	173454	239947	165409	134668	122305	145533	262547	260810	274269	272326	315534	258540	246600	282292	268604	380304	413227	267852	341971	298528	163683	165358	179497	183560	199919	208033
6443	34490	6953	4464	1033	57549	58225	213731	170055	146072	145384	156261	151506	115914	102520	48149	66371	66257	60318	64792	73030	140332	224715	348518	490148	565588	634077	671729	504677	453374	406072	500362	628115	698958	758715	713326	519742	735240	744604	871403	672741	769132	747272	656654	811295	855082	819460	822733	802480	785362
223066	137386	138530	153847	205600	218080	61598	118123	139299	188799	293977	260309	276204	249811	282495	392757	453656	487599	413425	494435	600508	603867	635933	504224	443068	282778	279893	306047	333688	401166	261223	258254	321983	400488	347044	335300	328394	368124	346034	377357	393628	386621	382403	381929	398184	416367	427836	470044	395369	426195
2422	9669	177093	3474	3039	3305	5498	62674	72355	70624	77062	73934	74558	75122	72730	75228	48517	109472	29287	41033	65462	47554	77861	69722	64058	74707	61884	65637	114700	66374	78572	90837	108369	66706	47103	16560	16800	46694	61391	69856	73043	84387	124322	91124	97204	126355	125535	102230	109853	136067
10494	11272	18036	19219	45347	79171	76514	119144	123944	132947	181014	200257	202778	231438	279096	290012	267926	301223	270391	298005	265623	268738	268583	261935	258788	218732	188018	188577	201763	257408	273767	303844	235145	115751	116098	93801	101324	106792	106668	178707	218483	174671	219359	223275	246962	291427	284395	179532	273744	265286
144	149	169	2280	832	764	830	606	447	3254	717	928	10234	555	859	640	668	312	247	263	328	204	243	44196	318	41639	36723	49031	47747	51523	71981	94508	127204	144826	156473	127039	121380	154009	139051	159827	173854	184226	143716	145032	173642	201243	205707	176268	214026	199029
4089	47364	40912	69468	82669	35677	89676	106968	128661	199660	233049	188666	55428	49890	62858	57187	52462	100522	87493	202215	163219	254689	288297	155344	121637	151408	21809	22338	14453	14197	12839	11902	14070	13465	12526	10476	10306	12106	11379	11940	12300	12364	11698	11653	12617	12789	13265	13102	13610	13338
8820	13851	28938	26918	28258	31620	37176	37894	36468	41687	48251	47268	50211	51462	53493	54923	53211	51984	46229	49128	50471	48290	46807	42545	32227	44315	42371	41887	42771	45825	43500	42706	48684	46703	46837	58504	55715	49916	52201	24882	31144	48196	54053	41296	56724	75941	66679	64618	66825	47027
2003	2096	2325	3903	4593	6136	5396	11848	10975	15163	17590	20187	18602	23555	25321	28758	33884	35381	35889	35943	32552	38155	37692	42330	35820	32430	38732	41059	42647	37613	44240	45950	51730	52014	57622	63302	65135	70525	67351	82252	80442	77492	74601	81065	89329	90761	93570	100416	102802	104638
2568	9297	7208	6002	5163	6530	10882	14144	20080	17788	13642	11228	12928	23582	28359	33085	34622	32884	33617	39524	40618	39927	41258	47265	42274	42967	44428	45187	45708	44882	44583	41742	40947	38720	40452	40626	40803	41540	41464	42478	42008	41881	41693	42478	44257	41407	44074	42068	42048	42326
4864	4779	9408	9945	17178	25181	20538	29075	28249	28793	36198	53266	54166	58170	56069	60933	62863	69354	85753	75075	89661	99642	105362	119217	132417	137160	156714	163695	133323	120708	138224	161604	86051	119989	166463	153261	141924	161328	138408	121334	120991	145626	155312	171316	155759	142614	157370	176794	180615	172900
199	140	7925	161	134	136	66	130	1626	289	493	137	1287	104	435	3598	520	4103	1759	240	17277	1968	239	8489	9828	12755	16886	12358	11198	3602	5499	1336	2486	3973	10120	8680	7869	9670	7800	9744	6480	7514	9086	8282	14705	11375	10445	10011	9995	12791
5237	6936	4445	16734	17617	18198	17196	24892	28814	36129	34360	35402	36616	35895	42603	34721	36128	36529	34163	38962	35547	43530	42814	39450	36286	37682	41167	42000	39119	29181	34013	41255	43468	42133	47296	43887	43892	45335	46032	43527	41878	43558	46523	51023	56718	62318	63392	64722	65266	54645
4251	3553	5686	5503	4771	6078	9346	6493	6810	7178	7159	6889	7425	7528	8009	9409	6394	7774	7824	14000	11625	13026	34919	32089	27451	24792	21094	26295	26680	22482	20596	20969	20315	24263	20051	22541	24555	26637	31310	29244	26257	26982	36091	36265	34925	34572	34100	35409	40090	31931
153	2030	319	113	92	690	2421	3821	2435	1761	1835	2331	2951	3822	6411	7403	11391	11684	12975	13328	14832	10069	12446	11860	18240	8054	9162	10222	8322	13610	8594	8804	9279	14814	10750	8337	9393	7500	8898	10269	10208	7060	14486	7770	11204	8299	7598	7845	8100	6705
1237	581	1468	440	571	363	354	462	287	563	3986	2026	7359	1734	2687	3402	8949	1091	396	3685	5651	2415	2004	4275	510	662	2457	2005	2782	1642	1120	1564	560	1899	381	1311	1298	1624	405	2638	322	1569	2451	456	2446	3589	4007	5979	3040	1923
913	1870	2121	2128	1816	2036	986	1526	2123	1671	1695	1977	5240	2363	2235	2871	2302	5118	4965	3329	6126	7469	4842	6149	5914	5110	5893	5395	10085	9123	6627	6239	8303	14855	24352	10648	15486	18106	16654	12982	21173	14362	12015	16119	18361	17746	19741	18865	19607	15113
13848	12254	11265	10106	10368	15246	9366	6395	10563	17965	22038	18603	19663	22211	20673	21925	22011	21650	20063	20996	25807	19649	20279	20430	17111	11092	16839	18403	20478	23029	28889	25008	26012	29686	22996	35301	37528	43384	37556	32786	39984	50188	45011	47310	50395	47150	47046	53341	49494	45659
103	1209	189	111	1856	681	3160	3999	2438	1721	1833	2852	2897	3601	6732	10708	11391	11705	13700	13329	14536	10237	10671	10811	18210	8083	9161	9604	8322	12948	7711	8804	9177	14724	11791	8329	13178	7500	8836	10303	10300	7094	15394	6693	12062	7543	6526	7839	7187	6704
2714	827	97	643	4019	75	202	76	975	81	3373	9842	2965	7171	6653	10568	8361	8450	5450	8732	7669	7561	10001	10110	10380	11456	9281	5101	4825	3561	5185	8423	13162	8216	9710	6888	6514	6800	7356	7193	7482	9993	7174	8624	9503	9641	9598	8752	9646	10401
4736	20110	63286	55916	44772	44585	74028	65504	65980	69626	73523	74277	67400	68030	73183	55058	51066	54796	61833	66944	78238	71186	66841	63133	64240	68933	74947	78075	74258	70478	71476	79056	80342	77024	78797	81633	89439	83730	79245	79897	70164	80470	78467	77730	79292	79380	81586	85654	88570	81903
5916	2937	3846	9283	7087	8324	8057	9805	12725	7331	6050	6077	10627	11563	12408	13100	9337	7791	10660	11388	14968	7487	7531	6847	9878	10258	9975	19180	16395	21064	11811	11045	11563	8741	9260	15612	15068	18219	31741	23833	39191	39935	38127	48172	58240	37300	39763	52649	46559	48462
2690	6521	9830	13453	19230	31938	31157	36006	33199	35250	44848	44450	45019	41644	45445	54822	63885	62337	69288	78281	88515	102204	81276	79461	80341	80512	83380	78903	85088	84776	82440	74042	74799	82275	78137	87889	97634	101327	95176	99675	97534	95998	90964	98589	100163	101988	97874	95969	95955	94537
3056	5945	11270	10684	29501	56973	36067	36543	34089	44135	39431	49766	47919	46952	48262	48549	42647	59831	68950	75782	92249	85208	83708	76552	74405	75412	76340	78829	76843	76822	74324	78888	99169	96642	99089	101341	90354	87054	76141	78583	77241	85807	81213	81668	91807	80346	78971	79657	79235	78229
3610	87	9207	8685	13027	9461	12076	21050	11556	12352	13459	20759	18238	17830	17492	18455	17291	18996	17406	18017	17090	17225	16637	16692	16726	16549	17839	19813	18809	18592	18504	19421	18001	17938	18874	19690	18638	20461	17930	17586	17848	18015	17990	17763	17505	19723	18106	18724	21186	19537
8484	11472	10253	10303	13118	12983	13499	13623	13255	13866	13722	12401	11913	10844	12249	15684	11590	10673	11861	11804	12664	12959	13452	14671	13014	12133	13279	20951	16658	17049	16738	17774	17676	18646	18393	17450	20587	20265	21183	30565	21411	20432	20638	20805	21154	20254	20600	24247	23844	24595
85	91	124	143	133	140	165	104	171	149	168	127	163	118	131	101	120	126	115	125	144	158	119	136	261	124	1837	143	135	142	155	118	115	3228	138	125	127	144	7975	2365	142	354	131	372	163	130	144	127	4019	2786
118	195	149	2071	3000	2643	2966	2997	3222	3355	3460	4105	15390	13973	15262	14630	15106	16989	15206	13740	17065	18468	24150	24141	24388	42107	34639	34450	41444	38369	51401	54550	61356	56851	50197	46843	45462	47054	48006	49239	55134	59113	52998	52116	58477	52268	54538	55647	61486	54988
7960	9654	12347	11192	14231	17320	12246	10051	11773	12564	21064	11234	13284	15626	12361	11749	8330	16095	18065	16883	17893	17318	14736	15462	17646	14225	17303	16808	64908	43270	43548	50806	63637	55535	54043	54303	47410	63252	64214	73397	57768	50315	55044	51683	67921	66195	63599	60426	63869	65842
18550	14516	18768	22817	26219	22957	18582	17659	19366	20248	23562	19890	25403	22157	30508	34281	31796	34513	33015	31419	30121	30469	30007	30153	31870	31967	33691	31161	29865	30850	36895	36350	40718	36268	37489	47016	41984	48499	49248	44353	42783	37725	47927	46468	45850	44835	46445	51030	55606	70003
267	4950	1496	2010	652	866	1855	3958	2026	2324	2605	2016	1330	2049	5586	5773	7140	5670	3292	4528	11212	9032	9099	10055	5290	13561	4459	2544	4236	5064	8871	7385	7850	14824	17398	15776	14612	16384	17839	21993	20624	26324	29641	33455	38005	33241	32974	32177	37546	39563
2877	3838	3376	4608	4761	7505	13490	13700	12780	12686	12448	13613	15968	14834	13827	12727	13151	12712	14854	16658	17101	20178	24093	21540	19484	19650	22908	33722	23830	25188	22428	22328	22022	24011	25175	24317	23250	31962	34591	35578	43471	38097	42371	41193	42136	43630	45217	42650	47601	43756
4312	4966	6002	4589	3231	4360	6604	14618	16277	17563	17914	17374	22716	22514	15435	27614	34154	35250	36468	39184	39476	39508	39732	35969	31222	32826	28530	32263	31420	30280	43014	44065	50005	58195	71629	73216	61258	58215	67510	50916	39920	40791	47343	47516	50758	54811	63801	46601	56146	65038
4371	5656	5254	3702	5813	5850	5986	960	11219	10615	7981	6514	7070	9332	10984	6523	17483	22654	20060	18929	21876	20684	20780	22901	20722	8346	15025	20466	17927	25904	26883	26788	18210	21851	37975	41262	44673	37947	39373	40174	37653	29107	39522	30532	31327	33345	32494	28954	34441	34091
6753	6756	5947	8098	6617	6581	6503	4101	8551	7260	7894	7946	9505	8526	9024	10425	12151	11357	17164	12932	9055	13134	17850	16300	15314	17482	17432	14417	14685	13305	19348	16275	16729	22409	28239	24329	23460	36924	32704	20153	21649	46964	39271	44105	41011	39721	37320	38124	36983	36172
43905	16914	42347	111239	138785	229429	425777	498832	525700	462561	517891	537302	452729	393046	456773	336611	375371	361174	363385	422623	444464	497051	480675	478388	484811	462061	526571	483470	462916	504413	503434	440407	547212	509813	588915	566830	602224	540896	561118	591031	512778	530761	543711	536307	555834	515118	510289	509498	525107	519362
38134	49884	47799	39943	70642	85332	83900	83818	125072	122618	118906	131362	130411	118288	151198	182643	171683	176763	176825	180414	184169	168178	170171	193510	210629	195470	202782	226255	266106	235033	283047	264124	262377	278068	305377	280678	286554	304142	297650	343045	353381	353124	343494	345708	349606	366902	370537	382500	415145	437077
148223	171993	181506	218344	196118	208617	215075	196459	204908	202435	229147	226270	234035	240006	240429	232505	244082	247158	239565	246565	252401	246146	240054	273466	268876	265946	271873	264681	260233	266211	262814	238929	260498	265956	233930	191419	168440	202178	235942	237276	246737	241388	241458	249495	243925	245082	242169	254808	247261	250828
2279	16611	43896	17517	28034	124982	16633	16629	16001	16966	18712	21789	35024	17600	18547	18806	23605	25672	19497	40170	70365	82270	63013	62581	67298	66064	64578	65405	65867	65391	55778	50422	51084	48059	47010	49667	56479	41569	39690	42361	39950	33592	31119	29370	26139	24846	23973	24462	23932	24469
[truncated: 1,950 more columns]
