# Supplementary material for: Intracellular growth of Mycobacterium tuberculosis after macrophage cell death leads to serial killing of host cells
Source: eLife journal article supplement (doi:10.7554/elife.22028), 2017-01-28
Supplement: supp [file elife-22028-supp-v1.zip › elife_poa_e22028_Figure_7_source_data_3.xlsx]

## Sheet: Sheet1
4028	4093	4169.5	4275.25	4358.75	4402.5	4407.25	4407.25	4344.75	4313.25	4307.5	4304.5	4315	4317.75	4284	4260	4260	4262	4274.25	4270.25	4268.5	4254.5	4236	4228	4238.5	4239.5	4241	4284.5	4350.75	4392.5	4396.75	4400	4421.25	4453	4473.5	4511	4473.5	4476.5	4497.5	4517	4471.25	4519.25	4547	4526.25	4549.5	4588.5	4617.75	4655.5	4686	4727.5
3190	3263.25	3278.5	3326.75	3342	3363	3363	3361.25	3334.25	3329	3329	3314	3314	3323.25	3339	3308.25	3341.5	3348.5	3374.75	3367.75	3377.75	3368.5	3368.5	3368.5	3378.25	3363.25	3396.25	3425.5	3426.75	3426.75	3426.75	3410.25	3393.5	3413.5	3413.5	3449.5	3441.5	3462.25	3469.5	3448.75	3448.75	3475.5	3475.5	3470	3459.75	3452.25	3438.25	3461.25	3456.75	3479.5
1154	1155.5	1161.25	1161.25	1159.75	1150.25	1153	1142	1138	1150.25	1151.5	1134.25	1132.75	1140.5	1140.5	1129.5	1153	1164	1148.5	1129.75	1144.25	1142	1134.5	1133.25	1143.25	1133	1133	1142.25	1145	1134.5	1146	1136.75	1136.25	1136.75	1144.5	1136.75	1134.5	1143.5	1170	1152.5	1167.25	1188.75	1192	1173.5	1178.5	1172.25	1173.5	1165	1192.5	1216.25
790	820.75	829.75	847.75	842.75	870.5	866	866	841	832.75	822	822	827.25	822.25	831	826.5	826.5	838	848.75	851.75	859.75	859.75	855.75	850.5	840	819.5	801.25	795	795	800.5	817.75	836.5	836.5	836.5	839.75	850.5	833.5	864	837.75	836.25	834.75	860.25	837	846.25	846	841.75	841.75	843.75	848	855
3472	3614.25	3677.5	3719	3719	3732	3731	3703.25	3695.5	3711.75	3710.5	3710.5	3710.5	3716.25	3709	3699.5	3721	3730.5	3730.5	3773.25	3799.25	3803.5	3817.75	3835.25	3860.25	3860.25	3824.75	3853.25	3805	3817.25	3876.75	3911	3882.25	3927.75	3903	3907.25	3898.25	3898.25	3881.5	3897.25	3906.75	3951.5	3958.5	3978.75	3983.5	3982.75	4031.25	4150	4183.5	4216
1295	1237.5	1220.25	1211.5	1191.25	1212.75	1210.25	1192.5	1169.25	1185.5	1167.5	1154.75	1139.75	1122.75	1122.75	1118.75	1131.75	1126	1128.25	1110.5	1094.75	1094.75	1100.25	1084.25	1099.75	1096.75	1099.25	1105.5	1126.5	1121.75	1121.75	1132.5	1117.25	1122.75	1141.75	1157.25	1143.25	1153.75	1144.75	1149	1135.75	1140	1141.75	1143.25	1143.25	1152.75	1152.25	1156.5	1176	1184
1718	1702.5	1702.5	1717.75	1732.5	1732.5	1761	1733.25	1709.75	1721	1743.75	1720.75	1740	1740	1717.75	1720.5	1732.5	1732	1749	1749	1749	1748.25	1733.5	1735.25	1716	1696.75	1720.5	1738	1711	1726	1745	1749	1749.5	1770.25	1803.5	1836.5	1836.5	1856.5	1848	1813	1818	1818	1807.25	1820.25	1831	1831	1850.75	1884.5	1899.75	1899.75
1650	1656	1656	1658.75	1674.75	1671.75	1671.75	1667.5	1676.5	1676.5	1684.5	1685.75	1682.5	1682.75	1682	1675.25	1676	1684.25	1694.75	1696.5	1697.25	1694.25	1694.25	1696.5	1700.75	1705.5	1715.5	1735.25	1726.25	1751.75	1764	1756.25	1749.75	1770	1764.5	1752.75	1763	1781.75	1781.75	1814.5	1859.25	1884.5	1893	1893	1876.75	1878.25	1882.25	1887.5	1909.25	1909.25
1700	1699	1723	1728.5	1704	1712.75	1706.5	1688.75	1666.5	1669.5	1641	1630	1630	1647.75	1617	1614.5	1639.75	1677.25	1667.75	1675.5	1688	1672.75	1660.75	1645	1633.25	1614.25	1603	1607.75	1607.75	1604.5	1623.5	1654.5	1654.5	1653.75	1667.75	1665.25	1659.5	1659.5	1659.5	1650	1640.25	1651.75	1679	1679	1678.75	1681.5	1659	1656.75	1653	1666.75
1884	1869.75	1890.75	1917.75	1901.25	1892.75	1902.25	1871	1845.5	1823.25	1812.75	1812.75	1813.25	1831.5	1831.5	1825.75	1787.25	1794.25	1794.25	1794.25	1807.75	1831	1832.25	1814	1814	1794.5	1780	1780	1786	1808.75	1845.75	1846	1869.75	1867.75	1859.5	1850	1872.5	1873	1872.25	1872.25	1888.75	1878.5	1882.25	1895.25	1895.25	1890.5	1888.25	1905.75	1880.75	1905.75
1387	1367.5	1349.5	1331	1331	1343.25	1343.75	1339.25	1377.75	1353	1347	1368.75	1383.5	1386	1402.25	1402.25	1416	1428.25	1447.75	1439	1477	1442.25	1403.75	1395.5	1415	1415	1414.75	1432.5	1454.75	1490	1517.5	1527	1531	1531	1527	1530.5	1508.25	1510.5	1537.75	1545	1539.5	1559	1549	1536.5	1522.5	1514	1512.75	1522.5	1525.75	1525.75
3087	3127	3153.5	3184.5	3153.5	3176	3174.75	3149.75	3120.25	3103	3095.75	3094.5	3102.5	3104.25	3103.75	3103.75	3113.75	3144.75	3182.25	3199.75	3238.25	3234	3206	3160.75	3147.75	3147.75	3162.75	3166.25	3184.5	3228	3297.5	3316.5	3316.5	3272.5	3271.5	3257.25	3277.75	3317.25	3344.75	3357.25	3357.25	3377	3356.25	3335.75	3318	3310.5	3310.5	3322	3329	3348
4466	4568.5	4631.5	4680.25	4680.25	4698	4717.5	4681	4647	4647	4649	4623.75	4602.25	4603.75	4606.75	4601.25	4617.25	4617.25	4624.5	4603.5	4603.5	4569.75	4619.25	4632	4680.5	4688	4691.75	4701	4702.75	4760.5	4835.75	4870.25	4870.25	4843.75	4835.75	4827.75	4827.75	4859	4894.5	4931	4968.75	5010.25	5033.5	5041.25	5041.25	5069.5	5018.25	5071.5	5101.5	5155.75
1964	1952.5	1922.25	1903.75	1898.75	1883.25	1878.75	1885.75	1883.5	1872.75	1880	1891.25	1898.5	1905.5	1905.5	1896.25	1899.5	1914	1910.25	1924.75	1932.5	1932.25	1949.5	1990.5	2009.25	1985.5	1992.5	1974.25	1968.75	1967.5	1975	2000.25	2000.25	2022.75	2035	2044.5	2022	2044	2068	2065.75	2065.75	2080.25	2053.25	2026.75	2050.25	2037	2037	2037	2063.75	2050.75
1755	1803.5	1833	1853.75	1875.5	1871.75	1869.5	1855	1868.75	1843.75	1825.5	1831.5	1785.25	1754.5	1740.5	1742.75	1742.75	1770.75	1823.5	1839.75	1847.5	1835.25	1829.75	1804	1822	1799.5	1820.25	1810.75	1829.75	1829.75	1853.5	1853.5	1859.5	1856	1846.75	1846.75	1856	1871.5	1897.25	1897.25	1930.5	1938.75	1908.75	1862.5	1892.5	1860.25	1844.5	1857.25	1887.5	1889.25
4145	4145	4150	4175.5	4192.25	4234.5	4234.5	4193.75	4181.75	4162.75	4162.75	4176.25	4176	4169.5	4170.75	4167.75	4167.75	4162	4190.25	4257.5	4288	4237.25	4248	4258.75	4247.25	4251.25	4284.5	4284.5	4284.5	4319	4352.5	4379	4379	4379	4328.5	4344.25	4318.75	4385.25	4327	4406.25	4421.5	4423.5	4418.25	4418.25	4351.5	4329.5	4310.5	4310.5	4354	4401.5
2824	2870.25	2897	2926.75	2920.75	2920.75	2897.5	2881.75	2841.75	2818	2815	2823	2824.25	2837	2837	2812.75	2799.75	2790	2790	2791	2818.5	2814.75	2794.5	2755.75	2799.75	2754.5	2733.25	2771	2815.5	2814	2822.5	2854.5	2832	2866.75	2896.25	2916.75	2916.25	2916.25	2887.75	2872	2866.25	2866.25	2866.25	2856.25	2862.75	2878.25	2849.75	2892.75	2926.5	2932.75
1372	1362.75	1362.75	1366.25	1383.75	1383.75	1382.75	1380.75	1380	1380	1380	1383.25	1386.75	1368.75	1344.75	1351.75	1355.25	1357	1357.25	1364.5	1378	1356.25	1337.25	1350	1352	1334.25	1352	1366	1378.25	1391	1400.75	1403	1403	1396.5	1395.25	1387.5	1388.25	1392.75	1405.75	1399.5	1400	1386	1392.25	1377.5	1389	1378.75	1390.5	1390.75	1396.5	1389.5
646	637.25	641.75	636.25	636.25	636.25	642.75	633.25	637.5	637.5	649	654.75	654.75	643	642	642	634	657.5	657.5	642.75	631.25	635.75	630.5	640	640	649.75	642.75	651	643.5	646	650.25	654.25	654.5	654.5	650.75	639.25	644.25	637.25	652	677.75	698	680.5	691.5	684	655.5	655	654.5	649.75	670.5	686.75
2910	2899.75	2913.5	2909.5	2909.25	2908	2916.75	2902.75	2899.25	2896	2903.5	2896	2881.75	2888	2858.5	2836.5	2837.5	2858.75	2861.75	2858.25	2904.5	2932.5	2948	2946	2968.25	2976.25	2963.25	2941.5	2960.25	2933.75	2937.5	2973.5	2998.5	3009.25	3014	3031.5	3064.25	3066.5	3066.5	3110	3135.25	3134.75	3147	3153.5	3150.75	3157.75	3168.25	3177	3202	3266.25
2398	2430	2446.5	2452.75	2466.75	2464	2492.5	2462	2448	2423	2446	2422.5	2414.5	2404	2395	2377	2381.5	2378.5	2380	2399.5	2428.25	2409	2399.25	2425	2395	2377.5	2387	2379	2377	2363.5	2393.5	2393.5	2403.5	2398.75	2408.25	2406.75	2406.75	2404.5	2423.25	2437.25	2448.25	2445.5	2468.75	2444.25	2444.25	2468.25	2462.75	2468.25	2483.25	2459.5
900	961.5	991.5	1004.5	1005.5	1005.5	994	994	988.75	1001.5	1004	1004	984.5	980	969	958.25	964	965.5	947.25	958.5	963.75	963.75	959.75	970.75	983	982.5	965.25	967.5	959.5	959.5	960.75	975.25	973.75	975.25	970.25	984.75	973.5	973.5	986.75	989.25	996.5	1013	1013	1006	1021.25	992.5	985	1003.25	1034.25	1034.25
3360	3436.25	3486.25	3529.75	3577.25	3577.25	3587.25	3564.5	3528.5	3524.25	3543.75	3522	3491.75	3461.75	3422.25	3415	3427.75	3451.75	3491.5	3527.25	3557.75	3588.25	3595.25	3595.25	3595.25	3577.25	3581	3555.75	3529.25	3549.25	3602.5	3578	3578	3580.75	3578	3578	3594.5	3635	3670	3691.75	3707.5	3707.5	3701.75	3691.25	3672.75	3672.75	3689	3685	3716.25	3719.25
3579	3863.75	3962.25	3962.25	4000.5	4081.25	4142	4133.25	4133.25	4141.75	4170.25	4101.25	4145.75	4145.75	4075.75	4030	4038.5	4005.5	4016.25	3997	4017.5	4010.5	4034.5	4068.25	4068.25	4040	4061	4087.25	4071.75	4094	4121.25	4119	4119	4127	4144.25	4140	4154.5	4208.25	4248.75	4247.75	4258	4270.5	4263.25	4246.5	4254.25	4285	4241.75	4213	4249.25	4240.75
4137	4235.25	4291.25	4354.5	4387	4391.75	4457.5	4457.5	4397	4350	4338.75	4278.25	4272	4247	4215.25	4192.25	4210.25	4208.25	4209.5	4263.75	4318	4295.75	4291.5	4317.5	4289.5	4259.25	4261	4292.25	4269.5	4298	4331	4380.75	4346	4371.75	4429.25	4387.75	4387.75	4444.75	4445.5	4428	4461.75	4480	4480.25	4480.25	4485.5	4496.5	4471	4452	4487.5	4538.75
1968	1935.5	1970.5	1983	1984.25	2024.75	2029.75	2051.75	2077.5	2093.25	2081.5	2082	2063.5	2025.25	2020	2020	2039.75	2037.5	2050.5	2063	2083	2066	2076.5	2100	2115	2119.5	2140.25	2155.5	2162.5	2162.5	2169.75	2170.25	2177.5	2186.5	2213.75	2226.5	2233.25	2233.25	2238.75	2270.25	2310	2330.25	2330.25	2307.25	2307.25	2278	2271	2281.5	2300.75	2300.75
4004	4150.25	4253.25	4301.5	4327.5	4327.5	4346.5	4379.25	4352.25	4325.5	4325.5	4301.5	4279.5	4256	4227.25	4215.75	4219.25	4219.25	4238.25	4279.25	4316.25	4351.5	4316.25	4320.75	4351.75	4356.5	4361.75	4401.75	4401.75	4410.25	4415.5	4415.5	4392.25	4435	4499.25	4516.5	4524.5	4567.5	4596.5	4623.5	4645.75	4645.75	4664	4637.25	4645.5	4683.5	4724	4729	4729	4695.75
851	828	828	816	825.75	829.25	850.75	828.5	828.5	826.75	847.5	819	840.5	840.5	812.5	805.25	826.75	830.75	833.25	845.75	864	867.5	850.75	877	874.25	848.25	852.5	853.75	837	851.25	852.75	838	842	851.25	851.25	865.5	885.25	894	907.75	909	899.25	891	880.75	860	859.25	866	866	863.25	881.25	867
1865	1899.5	1944.5	1992.75	2008.25	2008.25	2010	1982.25	1928.25	1921.75	1971.5	1960.25	1995.5	1995.5	1973.75	1909.25	1907.25	1901.25	1935.25	1947.75	1954.5	1951.75	1951.75	1951.5	1951.5	1932.5	1890.5	1889.75	1849.75	1851.25	1850	1871	1871	1877.75	1879.5	1882	1897.25	1925	1930.25	1930.25	1925.5	1906.25	1891	1875.5	1872	1858.75	1858.75	1853.5	1844.5	1825
821	818.25	798.5	797	793.25	793.25	786.25	781.75	781.75	784.25	781.75	790.25	793.75	791.75	792.25	809	796.5	796.5	784	787	775.5	775.5	787.5	787.5	792	795.25	792.75	796	796	790.75	791.25	791.5	791.5	791.5	805.5	807.5	799.5	786.25	796	796	804.75	805.75	809.25	811.5	817.5	821.25	821.25	816.75	803.5	799
1326	1352	1366	1370.5	1377.5	1380.75	1386	1385.25	1386.25	1374.5	1374.5	1360	1365.25	1368.25	1356.5	1354	1368.75	1370.75	1370.75	1383.25	1399	1397.25	1396.75	1398	1388.5	1368.5	1386.75	1390.75	1376	1363.5	1364.5	1363	1352.5	1363	1374.75	1373.25	1362	1382.25	1382.25	1378.5	1389	1394.25	1396	1391.75	1393	1387.5	1378.75	1378.75	1390.25	1400.5
4690	4679.5	4679.5	4699.5	4735	4765.25	4777.75	4786.5	4808.75	4821.75	4835	4835	4822	4817	4786	4786	4807.5	4808.75	4829.25	4854	4858.25	4832	4860	4851.25	4859.75	4901.75	4966	4992	5033.25	5040.75	5040.75	5042.25	5034	5004.25	5021.5	5090.5	5102.25	5201	5259.5	5289	5302.5	5305	5306.5	5306.5	5325.75	5334.75	5321.5	5340.25	5358	5391.25
4208	4164.75	4164.75	4125.75	4151.75	4186.25	4196	4175.75	4175.75	4174.25	4127	4085.5	4083.5	4073.25	4071.75	4055.25	4045.25	4043.5	4004.5	4037.5	4061	4045.25	4019.5	4033.75	4060.5	4023.25	4023.25	4014.5	4036	3991.5	4003.5	4003.5	4032	3992.75	4022.5	4022.5	4010.25	3964.25	4018.75	4030.5	4048.5	4071.5	4089	4098.5	4093	4094.5	4110.5	4117	4117	4117
2664	2641.5	2641.5	2647.25	2676.75	2711.5	2736.5	2736.5	2736	2701.75	2685.5	2670.25	2685.5	2681	2704	2733	2749	2749	2758.75	2751.25	2752.75	2752.75	2747.5	2747.5	2754.5	2750.5	2781.5	2785	2816.75	2758.75	2772.5	2761.75	2753.5	2731.5	2757.75	2787.75	2781.25	2831.75	2842.5	2814.75	2795.25	2800	2787	2787	2783	2765.5	2765.75	2771	2768.25	2776.5
1655	1630	1630	1630.25	1649.75	1661.25	1661.25	1658.75	1653.25	1649.75	1638.5	1638.5	1628.25	1630.25	1619.75	1613.5	1616	1618.25	1618.25	1624	1633.5	1642.75	1653.5	1653.5	1670.25	1670.75	1645.25	1630.25	1642.25	1642.25	1643	1650.75	1650.75	1650.25	1660.75	1659.5	1662	1665.75	1677.5	1665.75	1667.75	1683.75	1697.25	1692.25	1692.25	1692.25	1703.5	1710.5	1740	1754.25
1097	1046.75	1037.25	1037.25	1058.5	1057.25	1057.25	1042.75	1026.25	1020.75	1016.75	1001.75	979	998.25	980.25	977.5	1003	1017.5	1000.75	1006.75	1002.25	992.25	992.25	997.5	1003.25	998.5	1005.75	1015.75	1028.25	1002.5	1022	1017.75	1013	1014.5	1025.5	1012.75	1020.75	1025	1016.25	1004.75	1005.75	1010.75	1010.5	1025	1045.5	1045.5	1042	1038.75	1056.25	1032.5
2016	1871.75	1859	1842.25	1875.75	1877.5	1911.75	1877.5	1845	1819.5	1809.5	1806.5	1806.5	1814	1797.75	1802	1773	1773	1765	1800.75	1832.75	1832.75	1839.75	1835.5	1816.5	1811.5	1814.25	1795.5	1814.25	1811.75	1827.75	1872.75	1895.25	1897.75	1914.5	1948.25	1948.5	1959	1936.5	1915.75	1915.75	1949	1986.25	2008.5	2008.5	1987.5	1953.5	1953.5	1956.5	1988
968	981	1008.25	1030.25	1032.25	1032.25	1028.25	1013	992.75	988	993.5	993.5	999.25	1016	1027	1021.25	1011.75	1016.25	1016.25	1020.75	1020.75	1014.25	1024.75	1002.75	1000	1005.5	1013.25	1008.25	1013.25	1016	1025.75	1023.5	1029.25	1034.25	1034.25	1045.75	1053	1053	1060.75	1062.75	1068.25	1085.75	1092	1085	1085	1082.25	1082.25	1082	1088.5	1091
1547	1406.25	1340	1304	1261.5	1234.75	1219.75	1206.5	1206.5	1208.75	1234	1270.5	1282.5	1284	1299.5	1320.75	1322.25	1323	1315.75	1315.75	1313	1330	1332.75	1333	1322	1326.25	1327	1324.75	1323.25	1338	1333	1319.5	1333	1346.5	1360.75	1378.75	1397	1383.25	1385.75	1397.25	1397.25	1378.5	1379	1370.75	1383.5	1372	1377.25	1407	1443.25	1449.5
1344	1256.25	1191.5	1158.5	1126.75	1078.75	1043.75	1028.75	1016.25	1010.75	1005.5	1000.25	991.25	985	985	987.5	979.25	985.25	980.5	978.25	961.5	969.25	964.25	968	968.5	973.75	983	983	980	980	988.75	994.5	994.5	1013.75	1025	1033.25	1033.25	1033.25	1025	1030	1030.25	1030.25	1031.75	1044.5	1064	1072.5	1087.5	1095.75	1107	1103.5
2024	1848	1724.25	1654.25	1599.25	1535.75	1498.25	1474	1474	1461.5	1439.75	1466.75	1466.75	1439.75	1454.75	1507	1535.5	1585.75	1592.75	1607	1612.5	1640.25	1638.25	1666	1681.75	1697	1727.25	1765.75	1790.75	1809	1826.25	1837.25	1837.25	1856	1898.5	1925	1983.25	1983.25	1988.25	1988.75	2009	2009.75	2054.5	2057.75	2058.5	2035.25	1993.5	1923	1842.25	1723
940	852.5	808.5	780.5	745.25	725.5	704.5	703.75	711	720.75	729.5	729.5	741.5	745.75	745.75	746.5	763.25	758.5	760.25	761.25	760.75	760.75	771.5	771.5	780.5	795.25	803	801.75	801.75	802.5	778.5	777	799.25	810.75	799	811.25	813.25	819.75	837	849.5	847.5	847.5	843.5	844.25	844.25	856	868.25	868.25	874.75	874.75
652	652	565.25	506.25	481.25	473.25	473	467	453	431	427.25	443	443.75	460.75	464.25	466.25	465.25	465.25	466	474.75	472.5	478.75	472.5	459.75	458	469	454	457	453.75	456.25	456	484	488.25	488.25	479	482.75	482.75	479.5	488.25	489	486.25	486.25	488	486.5	489.5	493	494.5	494.75	494.75	494.75
893	790	717.75	678.75	665.75	655	636.25	636.25	648.75	648.75	654.5	654.5	654	660.25	658	662.75	667.75	667.75	663.75	664.75	653	633.75	653.75	641.75	646	656	676.25	670.25	670.25	666.5	663.25	660.5	658.5	668.5	663.75	663.75	660.25	659.25	655	653.75	657.5	652.75	659.75	665.5	681.5	681.75	695.25	708.5	713.25	721.5
351	325.5	309.75	300.25	287.5	274.25	280.75	276.25	269.25	275	279.75	276.75	278	278	282	283.25	293.25	300.75	300.75	305.5	306.75	316.5	315	315	315	312.5	304.25	311.5	311.5	315.5	316	320.5	322.25	322.25	323.25	323.25	332	343.75	362.25	366	369.75	367.75	370.5	373	382.5	395.5	400	400	400	400
2122	2055	1955.25	1863	1796.75	1757	1757	1757.5	1773.5	1775	1798	1795.25	1800.75	1775.5	1805	1810.75	1829.25	1832.5	1832.5	1831.75	1816.75	1815.25	1823.25	1833.75	1829.25	1837.25	1842.75	1839	1858.25	1856.25	1823.5	1804.25	1807.75	1800.75	1813.5	1845	1862.5	1864	1864	1839.75	1827	1827	1837.75	1844.75	1880.75	1929.75	1974.75	2001.5	2001.5	2014.25
932	859.25	804.25	769	749.75	743.25	737.25	730.5	733	733.25	725.5	721.75	721.75	711.75	711.75	723.5	714.5	729.75	733.25	730	716	729.25	723.25	735.25	729.5	740	745	745	761.75	768.5	756.5	750.75	763	760.75	766.25	776.75	777.25	772	776.25	784.75	782.5	790.25	790.25	791.5	803	815.75	821	833.5	845.5	861.25
847	789.5	747.75	710.25	692.25	689.25	684.75	666	654.25	636	636	649.75	649.75	650.75	666.75	661	671.5	685.5	685.25	693.5	693.5	694	670.75	669.25	669.25	690	688.25	708.75	719.5	709.75	713.5	713.5	711.25	700.25	719.25	710.5	710.5	713.5	716	708	711.75	730.5	724	746.25	746.25	727	727	750.75	754.75	755
1770	1655.5	1569.75	1511.25	1463.5	1426	1400.75	1400.5	1400.5	1410	1425	1445.25	1453	1481.5	1492.5	1492.25	1476	1492.25	1487.5	1491.75	1478.75	1491.25	1480.75	1470.5	1467.5	1472.75	1467.5	1467.5	1471.75	1469.5	1469.5	1476	1487.75	1496.5	1508.75	1516	1516.25	1515.75	1515.75	1515.75	1530.75	1547.25	1571.25	1571.25	1557.75	1561.25	1592.75	1608.25	1627.25	1634.25
3789	3789	3552	3302.75	3159.75	3153.25	3125.5	3107	3102.5	3102.5	3098.25	3098.25	3111.25	3145	3193.25	3269.5	3305.5	3319.25	3337.25	3378.25	3427	3473	3494	3496.75	3517.5	3517.5	3522.5	3523.25	3492.5	3480.25	3505.5	3478.75	3488.75	3519.75	3552.25	3560.75	3616.75	3641.5	3656.75	3677.25	3677.25	3695.75	3725.25	3782.25	3795	3846.25	3884.75	3884.75	3903	3926
1583	1500.25	1426	1367.5	1324.25	1323.25	1313.25	1289.75	1303	1303.5	1287.25	1283.5	1291.75	1299.75	1317.25	1321.25	1327	1318.25	1318.25	1324.25	1323.75	1325.75	1336.5	1350.25	1349	1362.75	1373	1373	1358.75	1358.75	1365.25	1350.75	1371.25	1393	1404.5	1417.75	1433.75	1449.25	1435.25	1435.25	1450.5	1471.25	1481.25	1536.75	1563.25	1543.75	1552.5	1566	1565.25	1572
598	358.25	252.25	233.5	226.5	216.75	222	219.75	217.25	227	227	219.25	219	223.25	222.75	227.75	229.25	229.25	228	226.25	221.5	221.5	219.5	217.75	219.25	230	229.25	225.5	237.5	237.25	229.5	228	228.5	228.5	231.5	242.75	242.75	246.25	244.5	257	243.5	258	256.25	259.25	248	261	261	266	268	271
1004	507.25	334.5	322.25	313.25	314.5	306.25	291.75	289.75	296.75	293.75	299.25	299.25	296	291.5	284.75	284.75	284.75	285.75	289.75	288.5	274	273	271.5	271.5	288.25	292.75	292.75	289.75	284.75	284.75	282.25	279.5	285.75	281	279	280.75	280.75	275.5	277.75	278.25	269	272	283	284.5	296.75	306.25	309.25	306.25	309.25
2440	1602.5	1294	1253	1206	1162.75	1136.25	1128.25	1108	1103.5	1077	1070.5	1082.75	1097	1101.75	1124	1124	1124	1116.5	1099.25	1089.5	1092.5	1096.25	1087	1106.5	1127.75	1134	1115	1124.25	1112.75	1104.25	1097	1089.25	1066.25	1071.25	1071.25	1072.5	1099	1099	1123.25	1116.75	1123.5	1129.5	1139.5	1143.5	1143.5	1156.75	1163.75	1176.25	1176.25
3366	2565.75	2202.75	2068.5	1960.75	1932.75	1909.5	1882.5	1879	1857	1857	1889.25	1916.25	1917	1932	1959	1993.75	1994.75	2000	2012.75	2006.75	2029.75	2163	2432	2710.75	2988.75	3257.75	3381.25	3381.25	3381.75	3354.5	3331.75	3331.75	3350.25	3357.25	3407	3451.5	3462.25	3428.5	3426.25	3347	3279.5	3246	3231	3215.75	3200.75	3200.75	3201.75	3243.25	3317
2779	2011	1668	1541	1462.75	1409	1344.25	1344.25	1341.75	1305.25	1333.5	1341.5	1337.75	1363.75	1383	1398.75	1464.25	1511.75	1515	1479.5	1488.25	1457	1440.25	1409.25	1440.5	1447.5	1447	1497.75	1524.75	1719	1951.5	2006.75	1744.5	1771	1771	1614.75	1596.25	1601.5	1572.75	1572.75	1650.25	1670.25	1702.75	1702.75	1693.75	1674.75	1684.25	1670.75	1723.75	1782
2513	1569	1272	1239.75	1223.5	1223.5	1217.25	1204	1186.5	1173.25	1160.5	1160.5	1174.25	1213	1255	1273.25	1273.25	1257.75	1234.25	1209	1207	1207	1223.25	1242	1260	1274.25	1275.75	1284.75	1289.25	1285	1262	1272	1272	1240	1240.75	1268.75	1242.75	1245.5	1265.25	1271	1273.25	1292.5	1292.5	1298.5	1299.25	1293.75	1290.75	1290.75	1299.25	1316.75
3413	2212.5	1765.75	1701	1640.75	1596.25	1563.75	1542.75	1542.75	1542.75	1537.25	1543.5	1572	1609.25	1646.5	1665.25	1683.5	1694	1688.25	1696.75	1694.5	1669	1673	1681	1684.25	1735.5	1743.5	1765	1765	1743.5	1718.75	1693.75	1678	1670.25	1655.25	1665.75	1678.75	1701	1705.25	1712.75	1722.5	1749.25	1743.25	1756.75	1761.25	1761.25	1757.25	1785	1824.25	1825.75
1980	1496.75	1283.5	1221	1172.25	1157.5	1149.5	1141.25	1149.75	1144.25	1127.75	1145	1161.75	1151.75	1167	1185.5	1189.5	1186.5	1202.5	1208.5	1196.25	1192.75	1192.75	1180.25	1180.25	1196	1184	1222	1237.25	1228.5	1214	1225.25	1225.25	1217.5	1225.25	1238.5	1253	1259.5	1261.5	1267	1261	1260.5	1261.5	1275.5	1315	1332	1359.25	1364.25	1342.25	1342.25
3195	2255.75	1845	1757.75	1727.75	1714.75	1700.75	1700.5	1694	1685	1685	1678.75	1678.75	1657.75	1665.75	1682.75	1681.75	1676	1696.5	1696.5	1677.25	1701	1685.75	1667	1667	1675.75	1676.5	1676.5	1671.5	1658	1649.5	1645.25	1639.25	1641	1639.25	1659.5	1667.25	1688	1678	1681.5	1683.5	1703	1684.5	1682.5	1707.5	1712	1729.5	1733.5	1743.5	1737.5
[truncated: 1,950 more columns]
