# Supplementary material for: Intracellular growth of Mycobacterium tuberculosis after macrophage cell death leads to serial killing of host cells
Source: eLife journal article supplement (doi:10.7554/elife.22028), 2017-01-28
Supplement: supp [file elife-22028-supp-v1.zip › elife_poa_e22028_Figure_8_figure_supplement_1.pdf]

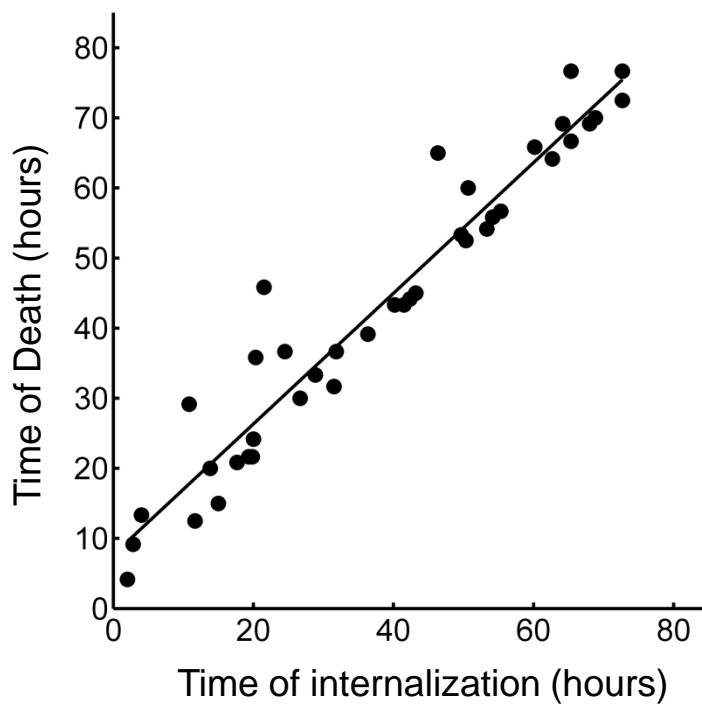

**Figure 8-Figure supplement 1:** Correlation of time of last pickup and time to death in cells internalizing a dead infected cell.  $R^2=0.93$  ( $p=8 \times 10^{-23}$ ), with a median time to cell death of 3.2 hours (interquartile range 1.5 to 6 hours).
