# Supplementary material for: Intracellular growth of Mycobacterium tuberculosis after macrophage cell death leads to serial killing of host cells
Source: eLife journal article supplement (doi:10.7554/elife.22028), 2017-01-28
Supplement: supp [file elife-22028-supp-v1.zip › elife_poa_e22028_Figure_9_figure_supplement_1.pdf]

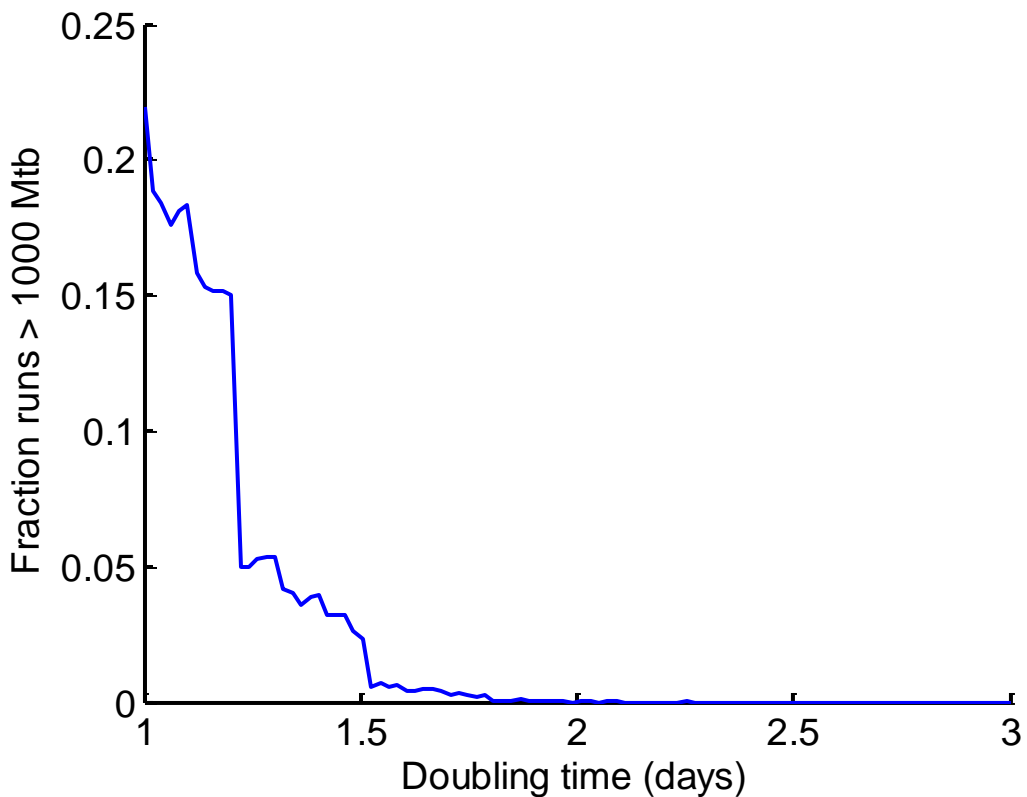

**Figure 9-Figure supplement 1:** Sensitivity of Mtb expansion to doubling time in dead cells. The stochastic simulation described in Figure 9 was repeated for doubling times ranging from 1 to 3 days, with 10,000 iterations per doubling time value. The fraction of iterations where Mtb expanded by more than 3 orders of magnitude (from 1 to >1000 bacilli) was calculated for each doubling time (y-axis).
